# Supplementary material for: Diet during pregnancy and infancy and risk of allergic or autoimmune disease: A systematic review and meta-analysis
Source: PLoS Med. 2018 Feb 28;15(2):e1002507. doi: 10.1371/journal.pmed.1002507 (PMC5830033; doi:10.1371/journal.pmed.1002507)
Supplement: S3 Data — (XLSX) [file pmed.1002507.s008.xlsx]

## Sheet: FATTY ACIDS-INTERV
FIRST AUTHOR	YEAR OF PUBLICATION	STUDY NAME	STUDY DESIGN	SPECIFIC OUTCOME	OUTCOME SUBGROUP	AGE AT OUTCOME	AGE AT OUTCOME GROUP	DISEASE RISK	FATTY ACID SOURCE	TIME AT INTERVENTION	TIME ADMINISTRATION GROUP	MATERNAL/CHILD ADMINISTRATION	TYPE OF INTERVENTION	TYPE OF FA	N.inter	n.inter	N.ctrl	n.ctrl	RR	LN(RR)	s.e(lnRR)	LL	UL	OVERALL RISK OF BIAS	OVERALL RISK OF BIAS GROU[	CONFLICT OF INTEREST BIAS	CONFLICT OF INTEREST BIAS GROUP
AUTHOR	YEAR	STUDY	design	spec.out	subgroup analysis (if applicable)	age at outcome	age.out	disease.risk	FA-SOURCE	Time.Inter	when	who	type	exp	N.inter	n.inter	N.ctrl	n.ctrl	RR	LN(RR)	s.e(lnRR)	LL	UL	bias.overall	overall.risk	Risk of Bias due to potential conflict of interest [No evidence of industry involvement = Low Risk of Bias]. Look at the the funding/acknowledgements/conflict of interest sections of the paper, if available	CoI
Berman	2015	Berman	RCT	AD		3	0to4	normal	FATTY ACIDS	pregnancy	pre-post-natal	pregnancy.only	n3	n3	57	23	27	3	3.63158	1.28967	0.567654	1.19371	11.0482	Unclear	High/Unclear	Unclear	High/Unclear
Best	2016	DOMInO	RCT	AD		6	5plus	high	FATTY ACIDS	pregnancy	pre-post-natal	pregnancy.only	n3	n3	367	108	336	115	0.859803	-0.151052	0.110697	0.692104	1.06814	Low	Low	Low	Low
Best	2016	DOMInO	RCT	AD-atopic		6	5plus	high	FATTY ACIDS	pregnancy	pre-post-natal	pregnancy.only	n3	n3	367	36	336	36	0.915531	-0.0882507	0.223281	0.591034	1.41819	Low	Low	Low	Low
Best	2016	DOMInO	RCT	Wheeze.rec	SPT	6	5plus	high	FATTY ACIDS	pregnancy	pre-post-natal	pregnancy.only	n3	n3	367	79	336	73	0.99078	-0.00926228	0.143722	0.747548	1.31315	Low	Low	Low	Low
Best	2016	DOMInO	RCT	Wheeze-atopic	SPT	6	5plus	high	FATTY ACIDS	pregnancy	pre-post-natal	pregnancy.only	n3	n3	367	60	336	45	1.22071	0.199431	0.182175	0.854164	1.74455	Low	Low	Low	Low
Best	2016	DOMInO	RCT	AR	SPT	6	5plus	high	FATTY ACIDS	pregnancy	pre-post-natal	pregnancy.only	n3	n3	367	81	336	98	0.756715	-0.278769	0.129803	0.586735	0.975939	Low	Low	Low	Low
Best	2016	DOMInO	RCT	AR-atopic	SPT	6	5plus	high	FATTY ACIDS	pregnancy	pre-post-natal	pregnancy.only	n3	n3	367	75	336	72	0.953678	-0.0474287	0.146701	0.715365	1.27138	Low	Low	Low	Low
Best	2016	DOMInO	RCT	AS-PEANUT	SPT	6	any	high	FATTY ACIDS	pregnancy	pre-post-natal	pregnancy.only	n3	n3	367	27	336	39	0.633829	-0.455975	0.238699	0.396998	1.01194	High	High/Unclear	Low	Low
Best	2016	DOMInO	RCT	AS-ANY	SPT	6	any	high	FATTY ACIDS	pregnancy	pre-post-natal	pregnancy.only	n3	n3	367	185	336	163	1.0391	0.0383549	0.0764159	0.894563	1.20699	High	High/Unclear	Low	Low
Bisgaard	2016	COPSAC	RCT	Wheeze.rec		5	5plus	normal	FATTY ACIDS	pregnancy/lactation	pre-post-natal	mother.and.child	n3	n3	346		349		0.68	-0.3857	0.1706	0.49	0.95	Low	Low	Low	Low
Bisgaard	2016	COPSAC	RCT	AD		5	5plus	normal	FATTY ACIDS	pregnancy/lactation	pre-post-natal	mother.and.child	n3	n3	346		349		1.1	0.0953	0.1374	0.83	1.44	Low	Low	Low	Low
Bisgaard	2016	COPSAC	RCT	AS	SPT-ANY	5	any	normal	FATTY ACIDS	pregnancy/lactation	pre-post-natal	mother.and.child	n3	n3	345	30	346	23	1.30813	0.268598	0.266501	0.77589	2.20547	Low	Low	Low	Low
Bisgaard	2016	COPSAC	RCT	AR		5	5plus	normal	FATTY ACIDS	pregnancy/lactation	pre-post-natal	mother.and.child	n3	n3	324	33	321	45	0.726543	-0.319457	0.215229	0.476491	1.10782	Low	Low	Low	Low	HR 0.68 95%CI 0.49, 0.95 P=0.024	RR 0.71 (95%CI 0.52, 0.95) based on 325 intervention 322 control successfully followed up. I suggest we use this RR, which is in the supplementary material, rather than the HR although they agree well.
Dotterud	2013	PACT	RCT	AD		2	0to4	normal	FATTY ACIDS/FISH	pregnancy-1st year	pre-post-natal	mother.and.child	n3 intake plus supplement	n3	1374	216	4780	788	0.953605	-0.0475053	0.070439	0.830634	1.09478	High	High/Unclear	Low	Low	HR 1.10 95%CI 0.83, 1.44 P=0.516
Dotterud	2013	PACT	RCT	Wheeze		2	0to4	normal	FATTY ACIDS/FISH	pregnancy-1st year	pre-post-natal	mother.and.child	n3 intake plus supplement	n3	1374	340	4780	1255	0.942489	-0.0592309	0.0529243	0.849623	1.04551	High	High/Unclear	Low	Low
Dotterud	2013	PACT	RCT	Wheeze.rec		2	0to4	normal	FATTY ACIDS/FISH	pregnancy-1st year	pre-post-natal	mother.and.child	n3 intake plus supplement	n3	1374	71	4780	337	0.732942	-0.310689	0.126944	0.571495	0.939998	High	High/Unclear	Low	Low
Dunstan	2003	Dunstan	RCT	AD		1	0to4	high	FATTY ACIDS	pregnancy	pre-post-natal	pregnancy.only	n3	n3	40	18	43	13	1.48846	0.397743	0.290212	0.842761	2.62888	Low	Low	Low	Low
Dunstan	2003	Dunstan	RCT	FA-ANY		1	0to4	high	FATTY ACIDS	pregnancy	pre-post-natal	pregnancy.only	n3	n3	40	3	43	5	0.645	-0.438505	0.696475	0.164706	2.52587	Low	Low	Low	Low
Dunstan	2003	Dunstan	RCT	AS-ANY	SPT-ANY	1	any	high	FATTY ACIDS	pregnancy	pre-post-natal	pregnancy.only	n3	n3	35	9	37	14	0.679592	-0.386263	0.356288	0.338041	1.36624	Low	Low	Low	Low
Dunstan	2003	Dunstan	RCT	AS-CM	SPT-CM	1	any	high	FATTY ACIDS	pregnancy	pre-post-natal	pregnancy.only	n3	n3	35	1	37	5	0.211429	-1.55387	1.06977	0.0259752	1.72095	Low	Low	Low	Low
Dunstan	2003	Dunstan	RCT	AS-EGG	SPT-EGG	1	any	high	FATTY ACIDS	pregnancy	pre-post-natal	pregnancy.only	n3	n3	35	6	37	14	0.453061	-0.791728	0.427196	0.196119	1.04663	Low	Low	Low	Low
Dunstan	2003	Dunstan	RCT	AS-PEANUT	SPT-PEANUT	1	any	high	FATTY ACIDS	pregnancy	pre-post-natal	pregnancy.only	n3	n3	35	3	37	6	0.528571	-0.637577	0.666634	0.143104	1.95234	Low	Low	Low	Low
Dunstan	2003	Dunstan	RCT	Wheeze		1	0to4	high	FATTY ACIDS	pregnancy	pre-post-natal	pregnancy.only	n3	n3	40	10	43	12	0.895833	-0.110001	0.367529	0.435893	1.84109	Low	Low	Low	Low
Dunstan	2003	Dunstan	RCT	Wheeze.rec		1	0to4	high	FATTY ACIDS	pregnancy	pre-post-natal	pregnancy.only	n3	n3	40	2	43	6	0.358333	-1.02629	0.786391	0.0767181	1.6737	Low	Low	Low	Low
D'Vaz	2012	D'Vaz	RCT	FA-ANY		1	0to4	high	FATTY ACIDS	1st year	postnatal.only	child.only	n3	n3	156	19	167	25	0.81359	-0.206299	0.283255	0.466975	1.41748	Unclear	High/Unclear	Low	Low
D'Vaz	2012	D'Vaz	RCT	AS-ANY	SPT-ANY	1	any	high	FATTY ACIDS	1st year	postnatal.only	child.only	n3	n3	156	44	163	46	0.999443	-0.000557569	0.178665	0.704166	1.41854	Unclear	High/Unclear	Low	Low
D'Vaz	2012	D'Vaz	RCT	AS-CM	SPT-CM	1	any	high	FATTY ACIDS	1st year	postnatal.only	child.only	n3	n3	156	2	163	9	0.232194	-1.46018	0.77367	0.050967	1.05782	Unclear	High/Unclear	Low	Low
D'Vaz	2012	D'Vaz	RCT	AS-EGG	SPT-EGG	1	any	high	FATTY ACIDS	1st year	postnatal.only	child.only	n3	n3	156	35	163	36	1.01585	0.0157233	0.209294	0.674022	1.53103	Unclear	High/Unclear	Low	Low
D'Vaz	2012	D'Vaz	RCT	AS-PEANUT	SPT-PEANUT	1	any	high	FATTY ACIDS	1st year	postnatal.only	child.only	n3	n3	156	16	163	17	0.983409	-0.0167304	0.329816	0.515216	1.87706	Unclear	High/Unclear	Low	Low
D'Vaz	2012	D'Vaz	RCT	Wheeze		1	0to4	high	FATTY ACIDS	1st year	postnatal.only	child.only	n3	n3	115	21	126	16	1.43804	0.363283	0.305756	0.789782	2.61841	Unclear	High/Unclear	Low	Low
D'Vaz	2012	D'Vaz	RCT	AD		1	0to4	high	FATTY ACIDS	1st year	postnatal.only	child.only	n3	n3	156	61	167	68	0.960313	-0.040496	0.136752	0.734526	1.2555	Unclear	High/Unclear	Low	Low
Foiles	2016	DIAMOND	RCT	Wheeze		4	0to4	normal	FATTY ACIDS	1st year	postnatal.only	child.only	n3	n3	72	21	19	8	0.692708	-0.367146	0.325728	0.365835	1.31164	High	High/Unclear	High	High
Furuhjelm	2009	Furuhjelm	RCT	AS-CM	SPT-CM	0.5	any	high	FATTY ACIDS	pregnancy/lactation	pre-post-natal	mother.perinatal	n3	n3	54	3	65	5	0.722222	-0.325422	0.706704	0.180764	2.88555	Low	Low	Unclear	High/Unclear
Furuhjelm	2009	Furuhjelm	RCT	AS-EGG	SPT-EGG	1	any	high	FATTY ACIDS	pregnancy/lactation	pre-post-natal	mother.perinatal	n3	n3	52	6	63	16	0.454327	-0.788938	0.440526	0.191596	1.07734	Low	Low	Unclear	High/Unclear
Furuhjelm	2011	Furuhjelm	RCT	AD		2	0to4	high	FATTY ACIDS	pregnancy/lactation	pre-post-natal	mother.perinatal	n3	n3	54	11	65	21	0.630511	-0.461224	0.323458	0.334472	1.18857	Low	Low	Unclear	High/Unclear
Furuhjelm	2011	Furuhjelm	RCT	AD-atopic		2	0to4	high	FATTY ACIDS	pregnancy/lactation	pre-post-natal	mother.perinatal	n3	n3	54	5	63	15	0.388889	-0.944462	0.481949	0.151211	1.00016	Low	Low	Unclear	High/Unclear
Furuhjelm	2011	Furuhjelm	RCT	AR		2	0to4	high	FATTY ACIDS	pregnancy/lactation	pre-post-natal	mother.perinatal	n3	n3	54	2	65	2	1.2037	0.185403	0.982902	0.17533	8.26386	Low	Low	Unclear	High/Unclear
Furuhjelm	2011	Furuhjelm	RCT	AR-atopic		2	0to4	high	FATTY ACIDS	pregnancy/lactation	pre-post-natal	mother.perinatal	n3	n3	54	1	65	2	0.601852	-0.507744	1.21082	0.0560809	6.45899	Low	Low	Unclear	High/Unclear
Furuhjelm	2011	Furuhjelm	RCT	FA-ANY		2	0to4	high	FATTY ACIDS	pregnancy/lactation	pre-post-natal	mother.perinatal	n3	n3	54	6	65	16	0.451389	-0.795426	0.441886	0.18985	1.07323	Low	Low	Unclear	High/Unclear
Furuhjelm	2011	Furuhjelm	RCT	AS-AERO	SPT-AEROALLERGEN	2	any	high	FATTY ACIDS	pregnancy/lactation	pre-post-natal	mother.perinatal	n3	n3	51	1	62	4	0.303922	-1.19099	1.10194	0.035057	2.6348	Low	Low	Unclear	High/Unclear
Furuhjelm	2011	Furuhjelm	RCT	AS-ANY	SPT-ANY	2	any	high	FATTY ACIDS	pregnancy/lactation	pre-post-natal	mother.perinatal	n3	n3	52	10	61	22	0.533217	-0.628827	0.331407	0.278487	1.02095	Low	Low	Unclear	High/Unclear
Furuhjelm	2011	Furuhjelm	RCT	AS-FOOD	SPT-FOOD	2	any	high	FATTY ACIDS	pregnancy/lactation	pre-post-natal	mother.perinatal	n3	n3	52	8	61	21	0.446886	-0.805451	0.370128	0.21634	0.923117	Low	Low	Unclear	High/Unclear
Furuhjelm	2011	Furuhjelm	RCT	Wheeze.rec		2	0to4	high	FATTY ACIDS	pregnancy/lactation	pre-post-natal	mother.perinatal	n3	n3	54	7	65	8	1.05324	0.0518718	0.483688	0.408135	2.71801	Low	Low	Unclear	High/Unclear
Furuhjelm	2011	Furuhjelm	RCT	Wheeze.rec-atopic		2	0to4	high	FATTY ACIDS	pregnancy/lactation	pre-post-natal	mother.perinatal	n3	n3	54	2	64	4	0.592593	-0.523248	0.846083	0.112864	3.11141	Low	Low	Unclear	High/Unclear
Hansen	2017	Olsen	RCT	Wheeze.rec		18	15plus	normal	FATTY ACIDS	pregnancy	pre-post-natal	pregnancy.only	n3	n3	188	50	104	35	0.790274	-0.235376	0.183404	0.551647	1.13212	Unclear	High/Unclear	Low	Low
Hansen	2017	Olsen	RCT	AS-AERO	sIgE-AERO	18	any	normal	FATTY ACIDS	pregnancy	pre-post-natal	pregnancy.only	n3	n3	108	35	72	30	0.777778	-0.251314	0.196867	0.528785	1.14402	High	High/Unclear	Low	Low
Hansen	2017	Olsen	RCT	AR		18	15plus	normal	FATTY ACIDS	pregnancy	pre-post-natal	pregnancy.only	n3	n3	188	21	104	17	0.683354	-0.380742	0.302503	0.377703	1.23635	Unclear	High/Unclear	Low	Low
Imhoff-Kunsch	2011	Romieu	RCT	Wheeze		0.5	0to4	normal	FATTY ACIDS	pregnancy	pre-post-natal	mother.perinatal	n3	n3	420	50	414	45	1.09524	0.0909718	0.193458	0.749608	1.60023	Low	Low	Low	Low
Kitz	2006	Kitz	RCT	AD		1	0to4	high	FATTY ACIDS	lactation/1st year	postnatal.only	mother.and.child	n6	n6	55	10	76	14	0.987013	-0.0130721	0.374284	0.473942	2.05551	Unclear	High/Unclear	Unclear	High/Unclear
Lauritzen	2005	Lauritzen	RCT	AD		2.5	0to4	normal	FATTY ACIDS	lactation	postnatal.only	mother.postnatal	n3	n3	42	6	30	4	1.07143	0.0689929	0.599603	0.330804	3.47021	Unclear	High/Unclear	Low	Low
Lauritzen	2005	Lauritzen	RCT	FA-ANY		2.5	0to4	normal	FATTY ACIDS	lactation	postnatal.only	mother.postnatal	n3	n3	42	4	30	1	2.85714	1.04982	1.09218	0.335931	24.3005	Unclear	High/Unclear	Low	Low
Lauritzen	2005	Lauritzen	RCT	Wheeze		2.5	0to4	normal	FATTY ACIDS	lactation	postnatal.only	mother.postnatal	n3	n3	42	13	30	6	1.54762	0.436718	0.431795	0.663915	3.60757	Unclear	High/Unclear	Low	Low
Linnamaa	2010	Linnamaa's Blackcurrant Seed Supplementation Study	RCT	AD		1	0to4	normal	FATTY ACIDS	pregnancy/lactation/1st year	pre-post-natal	mother.and.child	n6	n6	100	33	110	52	0.698077	-0.359426	0.174479	0.495888	0.982704	High	High/Unclear	Low	Low
Linnamaa	2010	Linnamaa's Blackcurrant Seed Supplementation Study	RCT	AS-EGG	SPT-EGG	1	any	normal	FATTY ACIDS	pregnancy/lactation/1st year	pre-post-natal	mother.and.child	n6	n6	98	14	104	18	0.825397	-0.191891	0.32736	0.434518	1.5679	High	High/Unclear	Low	Low
Marks	2006	Childhood ASTHMA Prevention Study (CAPS)	RCT	AD		5	5plus	high	FATTY ACIDS	1st year	postnatal.only	child.only	n3 plus canola	n3	267	54	249	59	0.853552	-0.158349	0.166452	0.615946	1.18281	Low	Low	Unclear	High/Unclear
Marks	2006	Childhood ASTHMA Prevention Study (CAPS)	RCT	AR		5	5plus	high	FATTY ACIDS	1st year	postnatal.only	child.only	n3 plus canola	n3	267	111	249	102	1.01487	0.0147616	0.105126	0.825896	1.24709	Low	Low	Unclear	High/Unclear
Marks	2006	Childhood ASTHMA Prevention Study (CAPS)	RCT	Wheeze		5	5plus	high	FATTY ACIDS	1st year	postnatal.only	child.only	n3 plus canola	n3	267	83	249	82	0.943957	-0.0576744	0.128382	0.733958	1.21404	Low	Low	Unclear	High/Unclear
Marks	2006	Childhood ASTHMA Prevention Study (CAPS)	RCT	Wheeze.rec		5	5plus	high	FATTY ACIDS	1st year	postnatal.only	child.only	n3 plus canola	n3	267	62	249	51	1.13373	0.125513	0.167259	0.816838	1.57356	Low	Low	Unclear	High/Unclear
Mihrshahi	2003	Childhood ASTHMA Prevention Study (CAPS)	RCT	AD		1.5	0to4	high	FATTY ACIDS	1st year	postnatal.only	child.only	n3 plus canola	n3	279	47	275	48	0.965128	-0.0354941	0.186787	0.669251	1.39181	Low	Low	Low	Low
Mihrshahi	2003	Childhood ASTHMA Prevention Study (CAPS)	RCT	AS-AERO	SPT-AEROALLERGEN	1.5	any	high	FATTY ACIDS	1st year	postnatal.only	child.only	n3 plus canola	n3	278	31	275	32	0.958296	-0.0425987	0.237223	0.601966	1.52555	Low	Low	Low	Low
Mihrshahi	2003	Childhood ASTHMA Prevention Study (CAPS)	RCT	AS-ANY	SPT-ANY	1.5	any	high	FATTY ACIDS	1st year	postnatal.only	child.only	n3 plus canola	n3	278	51	275	58	0.869821	-0.139467	0.172092	0.620786	1.21876	Low	Low	Low	Low
Mihrshahi	2003	Childhood ASTHMA Prevention Study (CAPS)	RCT	AS-EGG	SPT-EGG	1.5	any	high	FATTY ACIDS	1st year	postnatal.only	child.only	n3 plus canola	n3	278	18	275	24	0.741906	-0.298532	0.299981	0.412098	1.33567	Low	Low	Low	Low
Mihrshahi	2003	Childhood ASTHMA Prevention Study (CAPS)	RCT	AS-PEANUT	SPT-PEANUT	1.5	any	high	FATTY ACIDS	1st year	postnatal.only	child.only	n3 plus canola	n3	278	12	275	13	0.913116	-0.0908927	0.391181	0.424175	1.96565	Low	Low	Low	Low
Mihrshahi	2003	Childhood ASTHMA Prevention Study (CAPS)	RCT	Wheeze		1.5	0to4	high	FATTY ACIDS	1st year	postnatal.only	child.only	n3 plus canola	n3	279	119	275	145	0.808923	-0.212051	0.089885	0.678259	0.96476	Low	Low	Low	Low
Mihrshahi	2003	Childhood ASTHMA Prevention Study (CAPS)	RCT	Wheeze.rec		1.5	0to4	high	FATTY ACIDS	1st year	postnatal.only	child.only	n3 plus canola	n3	279	41	275	34	1.18859	0.172771	0.215827	0.778606	1.81447	Low	Low	Low	Low
Noakes	2012	SiPS	RCT	AD		0.5	0to4	high	FISH (salmon)	pregnancy	pre-post-natal	pregnancy.only	n3 intake	n3	48	12	38	7	1.35714	0.305382	0.423133	0.592172	3.11031	Unclear	High/Unclear	Low	Low
Noakes	2012	SiPS	RCT	AS-ANY	SPT-ANY	0.5	any	high	FISH (salmon)	pregnancy	pre-post-natal	pregnancy.only	n3 intake	n3	48	6	38	5	0.95	-0.0512933	0.565259	0.313737	2.87661	Unclear	High/Unclear	Low	Low
Noakes	2012	SiPS	RCT	AS-CM	SPT-CM	0.5	any	high	FISH (salmon)	pregnancy	pre-post-natal	pregnancy.only	n3 intake	n3	48	2	38	2	0.791667	-0.233615	0.976141	0.116852	5.36352	Unclear	High/Unclear	Low	Low
Noakes	2012	SiPS	RCT	AS-EGG	SPT-EGG	0.5	any	high	FISH (salmon)	pregnancy	pre-post-natal	pregnancy.only	n3 intake	n3	48	3	38	4	0.59375	-0.521297	0.732246	0.141352	2.49404	Unclear	High/Unclear	Low	Low
Noakes	2012	SiPS	RCT	Wheeze		0.5	0to4	high	FISH (salmon)	pregnancy	pre-post-natal	pregnancy.only	n3 intake	n3	46	11	37	7	1.26398	0.234262	0.430116	0.544022	2.93671	Unclear	High/Unclear	Low	Low
Olsen	2008	Olsen	RCT	Wheeze.rec		16	15plus	normal	FATTY ACIDS	pregnancy	pre-post-natal	pregnancy.only	n3	n3	263	2	136	8	0.129278	-2.04579	0.783482	0.0278362	0.600395	Unclear	High/Unclear	Low	Low
Palmer	2012	DOMInO	RCT	AD-atopic		1	0to4	high	FATTY ACIDS	pregnancy	pre-post-natal	pregnancy.only	n3	n3	357	26	324	39	0.605042	-0.502457	0.241278	0.377056	0.97088	Low	Low	Unclear	High/Unclear
Palmer	2012	DOMInO	RCT	FA-ANY		1	0to4	high	FATTY ACIDS	pregnancy	pre-post-natal	pregnancy.only	n3	n3	357	11	324	11	0.907563	-0.0969923	0.419441	0.398879	2.06496	Low	Low	Unclear	High/Unclear
Palmer	2012	DOMInO	RCT	AS-CM	SPT-CM	1	any	high	FATTY ACIDS	pregnancy	pre-post-natal	pregnancy.only	n3	n3	349	6	317	3	1.81662	0.596977	0.702837	0.458138	7.20329	Low	Low	Unclear	High/Unclear
Palmer	2012	DOMInO	RCT	AS-EGG	SPT-EGG	1	any	high	FATTY ACIDS	pregnancy	pre-post-natal	pregnancy.only	n3	n3	349	34	317	52	0.593895	-0.521053	0.206452	0.396254	0.890113	Low	Low	Unclear	High/Unclear
Palmer	2013	DOMInO	RCT	AR		3	0to4	high	FATTY ACIDS	pregnancy	pre-post-natal	pregnancy.only	n3	n3	368	18	338	20	0.82663	-0.190398	0.316037	0.444933	1.53578	Low	Low	Unclear	High/Unclear
Palmer	2013	DOMInO	RCT	Wheeze		3	0to4	high	FATTY ACIDS	pregnancy	pre-post-natal	pregnancy.only	n3	n3	368	6	338	5	1.10217	0.0972845	0.600825	0.339483	3.57835	Low	Low	Unclear	High/Unclear
Peat	2004	Childhood ASTHMA Prevention Study (CAPS)	RCT	AD-atopic	no eczema; nonatopic eczema; atopic eczema	3	0to4	high	FATTY ACIDS	1st year	postnatal.only	child.only	n3 plus canola	n3	267	33	259	31	1.03262	0.0320998	0.234424	0.652221	1.63488	Low	Low	Unclear	High/Unclear
Peat	2004	Childhood ASTHMA Prevention Study (CAPS)	RCT	AS-FOOD	SPT-FOOD	3	any	high	FATTY ACIDS	1st year	postnatal.only	child.only	n3 plus canola	n3	134	21	163	24	1.06437	0.062379	0.275115	0.620738	1.82504	Low	Low	Unclear	High/Unclear
Peat	2004	Childhood ASTHMA Prevention Study (CAPS)	RCT	Wheeze-atopic	no wheeze; nonatopic wheeze; atopic wheeze	3	0to4	high	FATTY ACIDS	1st year	postnatal.only	child.only	n3 plus canola	n3	267	37	259	37	0.970037	-0.0304206	0.215517	0.635823	1.47993	Low	Low	Unclear	High/Unclear
van Gool	2003	EFAtop Study	RCT	AD		1	0to4	high	FATTY ACIDS	1st year	postnatal.only	child.only	n6	n6	60	23	58	28	0.794048	-0.230612	0.212802	0.523246	1.205	Unclear	High/Unclear	High	High/Unclear
van Gool	2003	EFAtop Study	RCT	AS-FOOD	sIgE-FOOD	1	any	high	FATTY ACIDS	1st year	postnatal.only	child.only	n6	n6	58	10	54	5	1.86207	0.621688	0.514043	0.679882	5.09986	Unclear	High/Unclear	High	High/Unclear

## Sheet: BIOTICS-INTERV
FIRST AUTHOR	YEAR OF PUBLICATION	STUDY NAME	STUDY DESIGN	SPECIFIC OUTCOME	OUTCOME SUBGROUP	AGE AT OUTCOME	AGE AT OUTCOME GROUP	DISEASE RISK	INTERVENTION	INTERVENTION GROUP	TYPE OF BACTERIA	MATERNAL-INFANT ADMINISTRATION	TIME OF INTERVENTION	N.inter	n.inter	N.ctrl	n.ctrl	OVERALL RISK OF BIAS	CONFLIC OF INTEREST BIAS	Mean.inter	SD.inter	Mean.ctrl	SD.ctrl
AUTHOR	YEAR	STUDY	design	spec.out	out.subg	age at outcome	age.out	disease.risk	exp	Interv	Type	Post.Admin	Time.Inter	N.inter	n.inter	N.ctrl	n.ctrl	overall.risk	CoI	Mean.inter	SD.inter	Mean.ctrl	SD.ctrl
Abrahamsson	2007	Abrahamsson	RCT	AD		2	0to4	High	PRO-SYNB	PROBIOTICS	No L.rhamnosus	Infant only	Other	95	34	93	32	High/Unclear	High/Unclear
Abrahamsson	2007	Abrahamsson	RCT	AtopicAD		2	0to4	High	PRO-SYNB	PROBIOTICS	No L.rhamnosus	Infant only	Other	76	13	75	21	High/Unclear	High/Unclear
Abrahamsson	2007	Abrahamsson	RCT	RC		2	0to4	High	PRO-SYNB	PROBIOTICS	No L.rhamnosus	Infant only	Other	100	1	100	4	High/Unclear	High/Unclear
Abrahamsson	2007	Abrahamsson	RCT	WHZ		2	0to4	High	PRO-SYNB	PROBIOTICS	No L.rhamnosus	Infant only	Other	94	17	94	15	High/Unclear	High/Unclear
Abrahamsson	2007	Abrahamsson	RCT	WHZ.REC		2	0to4	High	PRO-SYNB	PROBIOTICS	No L.rhamnosus	Infant only	Other	100	7	91	10	High/Unclear	High/Unclear
Abrahamsson	2007	Abrahamsson	RCT	AD		7	5to14	High	PRO-SYNB	PROBIOTICS	No L.rhamnosus	Infant only	Other	94	39	90	36	High/Unclear	High/Unclear
Abrahamsson	2007	Abrahamsson	RCT	AtopicAD		7	5to14	High	PRO-SYNB	PROBIOTICS	No L.rhamnosus	Infant only	Other	80	13	77	11	High/Unclear	High/Unclear
Abrahamsson	2007	Abrahamsson	RCT	LFobsrt		7	5to14	High	PRO-SYNB	PROBIOTICS	No L.rhamnosus	Infant only	Other	57	5	63	3	High/Unclear	High/Unclear
Abrahamsson	2007	Abrahamsson	RCT	LFrev		7	5to14	High	PRO-SYNB	PROBIOTICS	No L.rhamnosus	Infant only	Other	57	7	63	5	High/Unclear	High/Unclear
Abrahamsson	2007	Abrahamsson	RCT	RC		7	5to14	High	PRO-SYNB	PROBIOTICS	No L.rhamnosus	Infant only	Other	94	25	90	18	High/Unclear	High/Unclear
Abrahamsson	2007	Abrahamsson	RCT	WHZ		7	5to14	High	PRO-SYNB	PROBIOTICS	No L.rhamnosus	Infant only	Other	94	18	90	14	High/Unclear	High/Unclear
Abrahamsson	2007	Abrahamsson	RCT	WHZ.REC		7	5to14	High	PRO-SYNB	PROBIOTICS	No L.rhamnosus	Infant only	Other	94	17	90	15	High/Unclear	High/Unclear
Abrahamsson	2007	Abrahamsson	RCT	ASfd	sIgE - food	2	any	High	PRO-SYNB	PROBIOTICS	No L.rhamnosus	Infant only	Other	76	26	72	26	High/Unclear	High/Unclear
Abrahamsson	2007	Abrahamsson	RCT	ASany	SPT - common	2	any	High	PRO-SYNB	PROBIOTICS	No L.rhamnosus	Infant only	Other	94	17	93	27	High/Unclear	High/Unclear
Abrahamsson	2007	Abrahamsson	RCT	AScm	SPT - cow's milk	2	any	High	PRO-SYNB	PROBIOTICS	No L.rhamnosus	Infant only	Other	100	4	86	6	High/Unclear	High/Unclear
Abrahamsson	2007	Abrahamsson	RCT	ASegg	SPT - egg	2	any	High	PRO-SYNB	PROBIOTICS	No L.rhamnosus	Infant only	Other	93	13	91	21	High/Unclear	High/Unclear
Allen	2012	Allen	RCT	AD		2	0to4	High	PRO-SYNB	PROBIOTICS	No L.rhamnosus	Infant only	Other	214	73	222	72	High/Unclear	High/Unclear
Allen	2012	Allen	RCT	AtopicAD		2	0to4	High	PRO-SYNB	PROBIOTICS	No L.rhamnosus	Infant only	Other	171	9	173	21	High/Unclear	High/Unclear
Allen	2012	Allen	RCT	FAany		2	0to4	High	PRO-SYNB	PROBIOTICS	No L.rhamnosus	Infant only	Other	200	22	204	31	High/Unclear	High/Unclear
Allen	2012	Allen	RCT	RC		2	0to4	High	PRO-SYNB	PROBIOTICS	No L.rhamnosus	Infant only	Other	190	10	201	10	High/Unclear	High/Unclear
Allen	2012	Allen	RCT	WHZ		2	0to4	High	PRO-SYNB	PROBIOTICS	No L.rhamnosus	Infant only	Other	171	23	179	20	High/Unclear	High/Unclear
Allen	2012	Allen	RCT	ASany	SPT - common	2	any	High	PRO-SYNB	PROBIOTICS	No L.rhamnosus	Infant only	Other	171	18	173	32	High/Unclear	High/Unclear
Allen	2012	Allen	RCT	AScm	SPT - cow's milk	2	any	High	PRO-SYNB	PROBIOTICS	No L.rhamnosus	Infant only	Other	171	1	173	6	High/Unclear	High/Unclear
Allen	2012	Allen	RCT	ASegg	SPT - egg	2	any	High	PRO-SYNB	PROBIOTICS	No L.rhamnosus	Infant only	Other	171	9	173	19	High/Unclear	High/Unclear
Arslanoglu	2008	Moro	RCT	AD		2	0to4	High	PRE-SYNB	PREBIOTICS	PREBIO.only	Infant only	Postnatal only	66	9	68	19	High/Unclear	High/Unclear
Arslanoglu	2008	Moro	RCT	WHZ.REC		2	0to4	High	PRE-SYNB	PREBIOTICS	No L.rhamnosus	Infant only	Postnatal only	66	5	68	14	High/Unclear	High/Unclear
Arslanoglu	2012	Moro	RCT	AD		5	5to14	High	PRE-SYNB	PREBIOTICS	PREBIO.only	Infant only	Postnatal only	42	8	50	19	High/Unclear	High/Unclear
Arslanoglu	2012	Moro	RCT	RC		5	5to14	High	PRE-SYNB	PREBIOTICS	PREBIO.only	Infant only	Postnatal only	42	2	50	8	High/Unclear	High/Unclear
Arslanoglu	2012	Moro	RCT	WHZ.REC		5	5to14	High	PRE-SYNB	PREBIOTICS	No L.rhamnosus	Infant only	Postnatal only	42	8	50	12	High/Unclear	High/Unclear
Boyle	2011	Boyle	RCT	AD		1	0to4	High	PRO-SYNB	PROBIOTICS	L.rhamnosus	unclear	Other	108	35	102	43	Low	Low
Boyle	2011	Boyle	RCT	AtopicAD		1	0to4	High	PRO-SYNB	PROBIOTICS	L.rhamnosus	unclear	Other	107	19	101	19	Low	Low
Boyle	2011	Boyle	RCT	WHZ		1	0to4	High	PRO-SYNB	PROBIOTICS	L.rhamnosus	unclear	Other	122	27	120	29	Low	Low
Boyle	2011	Boyle	RCT	ASaero	SPT - aero	1	any	High	PRO-SYNB	PROBIOTICS	L.rhamnosus	unclear	Other	107	11	101	11	Low	Low
Boyle	2011	Boyle	RCT	ASany	SPT - common	1	any	High	PRO-SYNB	PROBIOTICS	L.rhamnosus	unclear	Other	107	35	101	33	Low	Low
Boyle	2011	Boyle	RCT	AScm	SPT - cow's milk	1	any	High	PRO-SYNB	PROBIOTICS	L.rhamnosus	unclear	Other	107	7	101	7	Low	Low
Boyle	2011	Boyle	RCT	ASegg	SPT - egg	1	any	High	PRO-SYNB	PROBIOTICS	L.rhamnosus	unclear	Other	107	27	101	22	Low	Low
Boyle	2011	Boyle	RCT	ASfd	SPT - food	1	any	High	PRO-SYNB	PROBIOTICS	L.rhamnosus	unclear	Other	107	31	101	29	Low	Low
Boyle	2011	Boyle	RCT	ASpn	SPT - peanut	1	any	High	PRO-SYNB	PROBIOTICS	L.rhamnosus	unclear	Other	107	7	101	6	Low	Low
Boyle	2016	PATCH	RCT	AD		1	0to4	High	PRE-SYNB	PREBIOTIC		Infant only	Postnatal only	347	107	370	112	Low	High/Unclear
Cabana	2015	Cabana	RCT	WHZ.REC		2	0to4	High	PRO-SYNB	PROBIOTICS	L.rhamnosus	Infant only	Postnatal only	93	20	92	26	High/Unclear	High/Unclear
Cabana	2015	Cabana	RCT	AD		2	0to4	High	PRO-SYNB	PROBIOTICS	L.rhamnosus	Infant only	Postnatal only	93	34	92	34	High/Unclear	High/Unclear
Dotterud	2010	Pro-PACT	RCT	AD		2	0to4	Normal/low	PRO-SYNB	PROBIOTICS	L.rhamnosus	Other	Other	138	29	140	48	High/Unclear	High/Unclear
Dotterud	2010	Pro-PACT	RCT	AtopicAD		2	0to4	Normal/low	PRO-SYNB	PROBIOTICS	L.rhamnosus	Other	Other	138	9	140	10	High/Unclear	High/Unclear
Dotterud	2010	Pro-PACT	RCT	RC		2	0to4	Normal/low	PRO-SYNB	PROBIOTICS	L.rhamnosus	Other	Other	138	1	140	1	High/Unclear	High/Unclear
Dotterud	2010	Pro-PACT	RCT	WHZ.REC		2	0to4	Normal/low	PRO-SYNB	PROBIOTICS	L.rhamnosus	Other	Other	138	8	140	12	High/Unclear	High/Unclear
Dotterud	2010	Pro-PACT	RCT	ASany	SPT or sIgE - common	2	any	Normal/low	PRO-SYNB	PROBIOTICS	L.rhamnosus	Other	Other	131	20	133	15	High/Unclear	High/Unclear
Enomoto	2014	Enomoto	CCT	AD		1.5	0to4	Normal/low	PRO-SYNB	PROBIOTICS	No L.rhamnosus	Infant only	Other	94	9	31	8	High/Unclear	High/Unclear
Enomoto	2014	Enomoto	CCT	WHZ		1.5	0to4	Normal/low	PRO-SYNB	PROBIOTICS	No L.rhamnosus	Infant only	Other	94	2	31	1	High/Unclear	High/Unclear
Gorrisen	2014	PANDA	RCT	AD		6	5to14	High	PRO-SYNB	PROBIOTICS	No L.rhamnosus	Other	Other	39	13	44	14	High/Unclear	High/Unclear
Gorrisen	2014	PANDA	RCT	WHZ		6	5to14	High	PRO-SYNB	PROBIOTICS	No L.rhamnosus	Other	Other	39	5	44	8	High/Unclear	High/Unclear
Gorrisen	2014	PANDA	RCT	FAany		6	5to14	High	PRO-SYNB	PROBIOTICS	No L.rhamnosus	Other	Other	39	4	44	2	High/Unclear	High/Unclear
Gorrisen	2014	PANDA	RCT	RC		6	5to14	High	PRO-SYNB	PROBIOTICS	No L.rhamnosus	Other	Other	39	5	44	1	High/Unclear	High/Unclear
Gruber	2010	MIPS-1	RCT	AD		1	0to4	Normal/low	PRE-SYNB	PREBIOTICS	PREBIO.only	Infant only	Postnatal only	292	17	300	29	High/Unclear	High/Unclear
Gruber	2010	MIPS-1	RCT	AScm	sIgE - cow's milk	1	any	Normal/low	PRE-SYNB	PREBIOTICS	PREBIO.only	Infant only	Postnatal only	137	7	122	7	High/Unclear	High/Unclear
Gruber	2010	MIPS-1	RCT	ASegg	sIgE - egg	1	any	Normal/low	PRE-SYNB	PREBIOTICS	PREBIO.only	Infant only	Postnatal only	137	3	122	3	High/Unclear	High/Unclear
Ivakhnenko	2013	Ivakhnenko	RCT	AD		1.5	0to4	Normal/low	PRE-SYNB	PREBIOTICS	No L.rhamnosus	Infant only	Postnatal only	62	3	53	9	High/Unclear	High/Unclear
Ivakhnenko	2013	Ivakhnenko	RCT	FAany		1.5	0to4	Normal/low	PRE-SYNB	PREBIOTICS	No L.rhamnosus	Infant only	Postnatal only	62	3	53	9	High/Unclear	High/Unclear
Ivakhnenko	2013	Ivakhnenko	RCT	FAcm		1.5	0to4	Normal/low	PRE-SYNB	PREBIOTICS	No L.rhamnosus	Infant only	Postnatal only	62	2	53	8	High/Unclear	High/Unclear
Kalliomaki	2003	Kalliomaki	RCT	AD		2	0to4	High	PRO-SYNB	PROBIOTICS	L.rhamnosus	Other	Other	64	15	68	31	High/Unclear	High/Unclear
Kalliomaki	2003	Kalliomaki	RCT	FAcm		4	0to4	High	PRO-SYNB	PROBIOTICS	L.rhamnosus	Other	Other	53	2	54	2	High/Unclear	High/Unclear
Kalliomaki	2003	Kalliomaki	RCT	RC		4	0to4	High	PRO-SYNB	PROBIOTICS	L.rhamnosus	Other	Other	53	10	54	5	High/Unclear	High/Unclear
Kalliomaki	2003	Kalliomaki	RCT	WHZ.REC		4	0to4	High	PRO-SYNB	PROBIOTICS	L.rhamnosus	Other	Other	53	3	54	1	High/Unclear	High/Unclear
Kalliomaki	2007	Kalliomaki	RCT	AD		7	5to14	High	PRO-SYNB	PROBIOTICS	L.rhamnosus	Other	Other	53	23	62	41	High/Unclear	High/Unclear
Kalliomaki	2007	Kalliomaki	RCT	RC		7	5to14	High	PRO-SYNB	PROBIOTICS	L.rhamnosus	Other	Other	53	12	62	6	High/Unclear	High/Unclear
Kalliomaki	2007	Kalliomaki	RCT	WHZ.REC		7	5to14	High	PRO-SYNB	PROBIOTICS	L.rhamnosus	Other	Other	52	9	60	3	High/Unclear	High/Unclear
Kalliomaki	2001	Kalliomaki	RCT	ASany	SPT - common	2	any	High	PRO-SYNB	PROBIOTICS	L.rhamnosus	Other	Other	61	11	65	9	Low	High/Unclear
Kalliomaki	2003	Kalliomaki	RCT	ASpn	SPT - peanut	4	any	High	PRO-SYNB	PROBIOTICS	L.rhamnosus	Other	Other	50	0	50	1	Low	High/Unclear
Kalliomaki	2001	Kalliomaki	RCT	total IgE		2	any	High	PRO-SYNB	PROBIOTICS	L.rhamnosus	Other	Other	64		68		Low	High/Unclear	31.3	5.969	32.7	7.449
Kim	2010	Kim	RCT	AD		1	0to4	High	PRO-SYNB	PROBIOTICS	No L.rhamnosus	Other	Other	33	12	35	22	Low	High/Unclear
Kim	2010	Kim	RCT	AtopicAD		1	0to4	High	PRO-SYNB	PROBIOTICS	No L.rhamnosus	Other	Other	31	3	29	6	Low	High/Unclear
Kim	2010	Kim	RCT	AScm	sIgE - cow's milk	1	any	High	PRO-SYNB	PROBIOTICS	No L.rhamnosus	Other	Other	31	9	29	11	High/Unclear	High/Unclear
Kim	2010	Kim	RCT	ASegg	sIgE - egg	1	any	High	PRO-SYNB	PROBIOTICS	No L.rhamnosus	Other	Other	31	9	29	8	High/Unclear	High/Unclear
Kim	2010	Kim	RCT	ASfd	sIgE - food	1	any	High	PRO-SYNB	PROBIOTICS	No L.rhamnosus	Other	Other	31	12	29	15	High/Unclear	High/Unclear
Kopp	2008	Kopp	RCT	AD		2	0to4	High	PRO-SYNB	PROBIOTICS	L.rhamnosus	Other	Other	50	19	44	14	Low	High/Unclear
Kopp	2008	Kopp	RCT	WHZ.REC		2	0to4	High	PRO-SYNB	PROBIOTICS	L.rhamnosus	Other	Other	50	13	44	4	Low	High/Unclear
Kopp	2008	Kopp	RCT	ASaero	sIgE - aero	2	any	High	PRO-SYNB	PROBIOTICS	L.rhamnosus	Other	Other	50	4	44	5	Low	High/Unclear
Kuitunen	2009	Kukkonen	RCT	AD		5	5to14	High	PRE-SYNB	SYNBIOTICS	L.rhamnosus	Infant only	Other	445	175	446	193	High/Unclear	High/Unclear
Kuitunen	2009	Kukkonen	RCT	AD		5	5to14	High	PRO-SYNB	SYNBIOTICS	L.rhamnosus	Infant only	Other	445	175	446	193	High/Unclear	High/Unclear
Kuitunen	2009	Kukkonen	RCT	AtopicAD		5	5to14	High	PRE-SYNB	SYNBIOTICS	L.rhamnosus	Infant only	Other	445	107	446	112	High/Unclear	High/Unclear
Kuitunen	2009	Kukkonen	RCT	AtopicAD		5	5to14	High	PRO-SYNB	SYNBIOTICS	L.rhamnosus	Infant only	Other	445	107	446	112	High/Unclear	High/Unclear
Kuitunen	2009	Kukkonen	RCT	RC		5	5to14	High	PRE-SYNB	SYNBIOTICS	L.rhamnosus	Infant only	Other	445	92	446	85	High/Unclear	High/Unclear
Kuitunen	2009	Kukkonen	RCT	RC		5	5to14	High	PRO-SYNB	SYNBIOTICS	L.rhamnosus	Infant only	Other	445	92	446	85	High/Unclear	High/Unclear
Kuitunen	2009	Kukkonen	RCT	WHZ.REC		5	5to14	High	PRE-SYNB	SYNBIOTICS	L.rhamnosus	Infant only	Other	445	58	446	63	High/Unclear	High/Unclear
Kuitunen	2009	Kukkonen	RCT	WHZ.REC		5	5to14	High	PRO-SYNB	SYNBIOTICS	L.rhamnosus	Infant only	Other	445	58	446	63	High/Unclear	High/Unclear
Kuitunen	2009	Kukkonen	RCT	ASaero	SPT - aero	5	any	High	PRO-SYNB	SYNBIOTICS	L.rhamnosus	Infant only	Other	444	169	446	162	High/Unclear	High/Unclear
Kuitunen	2009	Kukkonen	RCT	ASaero	SPT - aero	5	any	High	PRE-SYNB	SYNBIOTICS	L.rhamnosus	Infant only	Other	444	169	446	162	High/Unclear	High/Unclear
Kuitunen	2009	Kukkonen	RCT	ASfd	SPT - food	5	any	High	PRO-SYNB	SYNBIOTICS	L.rhamnosus	Infant only	Other	443	92	446	105	High/Unclear	High/Unclear
Kuitunen	2009	Kukkonen	RCT	ASfd	SPT - food	5	any	High	PRE-SYNB	SYNBIOTICS	L.rhamnosus	Infant only	Other	443	92	446	105	High/Unclear	High/Unclear
Kukkonen	2007	Kukkonen	RCT	AD		2	0to4	High	PRE-SYNB	SYNBIOTICS	L.rhamnosus	Infant only	Other	461	120	464	150	High/Unclear	High/Unclear
Kukkonen	2007	Kukkonen	RCT	AD		2	0to4	High	PRO-SYNB	SYNBIOTICS	L.rhamnosus	Infant only	Other	461	120	464	150	High/Unclear	High/Unclear
Kukkonen	2007	Kukkonen	RCT	AtopicAD		2	0to4	High	PRE-SYNB	SYNBIOTICS	L.rhamnosus	Infant only	Other	459	57	463	82	High/Unclear	High/Unclear
Kukkonen	2007	Kukkonen	RCT	AtopicAD		2	0to4	High	PRO-SYNB	SYNBIOTICS	L.rhamnosus	Infant only	Other	459	57	463	82	High/Unclear	High/Unclear
Kukkonen	2011	Kukkonen	RCT	WHZ		5	5to14	High	PRE-SYNB	SYNBIOTICS	L.rhamnosus	Infant only	Other	64	4	67	4	High/Unclear	High/Unclear
Kukkonen	2011	Kukkonen	RCT	WHZ		5	5to14	High	PRO-SYNB	SYNBIOTICS	L.rhamnosus	Infant only	Other	64	4	67	4	High/Unclear	High/Unclear
Kukkonen	2007	Kukkonen	RCT	ASany	SPT - common	2	any	High	PRE-SYNB	SYNBIOTICS	L.rhamnosus	Infant only	Other	454	127	462	144	High/Unclear	High/Unclear
Kukkonen	2007	Kukkonen	RCT	ASany	SPT - common	2	any	High	PRO-SYNB	SYNBIOTICS	L.rhamnosus	Infant only	Other	454	127	462	144	High/Unclear	High/Unclear
Kukkonen	2007	Kukkonen	RCT	total IgE		2	any	High	PRO-SYNB	SYNBIOTICS	L.rhamnosus	Infant only	Other	456		463		High/Unclear	High/Unclear	25.7	2.092	27.2	2.449
Lau	2012	Lau	RCT	AD		3	0to4	High	PRO-SYNB	PROBIOTICS	No L.rhamnosus	Infant only	Postnatal only	303	89	303	97	Low	High/Unclear
Lau	2012	Lau	RCT	ASaero	sIgE - aero	0.6	any	High	PRO-SYNB	PROBIOTICS	No L.rhamnosus	Infant only	Postnatal only	253	4	273	3	Low	High/Unclear
Lau	2012	Lau	RCT	ASfd	sIgE - food	0.6	any	High	PRO-SYNB	PROBIOTICS	No L.rhamnosus	Infant only	Postnatal only	253	114	273	121	Low	High/Unclear
Lodinová-Žádníková	2010	Lodinová-Žádníková	RCT	AD		5	5to14	High	PRO-SYNB	PROBIOTICS	No L.rhamnosus	Infant only	Postnatal only	46	2	45	10	High/Unclear	High/Unclear
Lodinová-Žádníková	2010	Lodinová-Žádníková	RCT	FAany		5	5to14	High	PRO-SYNB	PROBIOTICS	No L.rhamnosus	Infant only	Postnatal only	46	1	45	3	High/Unclear	High/Unclear
Lodinová-Žádníková	2010	Lodinová-Žádníková	RCT	WHZ		5	5to14	High	PRO-SYNB	PROBIOTICS	No L.rhamnosus	Infant only	Postnatal only	46	1	45	2	High/Unclear	High/Unclear
Lodinová-Žádníková	2010	Lodinová-Žádníková	RCT	ASany	sIgE - common	1	any	High	PRO-SYNB	PROBIOTICS	No L.rhamnosus	Infant only	Postnatal only	56	4	57	11	High/Unclear	High/Unclear
Morisset	2008	Morisset	RCT	FAcm		1	0to4	High	PRO-SYNB	PROBIOTICS	Unclear	Other	Postnatal only	59	6	56	9	High/Unclear	High/Unclear
Morisset	2008	Morisset	RCT	AScm	sIgE - cow's milk	1	any	High	PRO-SYNB	PROBIOTICS	Unclear	Other	Postnatal only	59	1	56	7	High/Unclear	High/Unclear
Niers	2009	PandA	RCT	AD		2	0to4	High	PRO-SYNB	PROBIOTICS	No L.rhamnosus	Infant only	Other	50	27	48	33	High/Unclear	High/Unclear
Niers	2009	PandA	RCT	AtopicAD		2	0to4	High	PRO-SYNB	PROBIOTICS	No L.rhamnosus	Infant only	Other	50	10	48	8	High/Unclear	High/Unclear
Niers	2009	PandA	RCT	ASaero	SPT - aero	2	any	High	PRO-SYNB	PROBIOTICS	No L.rhamnosus	Infant only	Other	46	3	47	1	High/Unclear	High/Unclear
Niers	2009	PandA	RCT	ASany	SPT - common	2	any	High	PRO-SYNB	PROBIOTICS	No L.rhamnosus	Infant only	Other	46	4	47	4	High/Unclear	High/Unclear
Niers	2009	PandA	RCT	ASfd	SPT - food	2	any	High	PRO-SYNB	PROBIOTICS	No L.rhamnosus	Infant only	Other	46	2	47	3	High/Unclear	High/Unclear
Ou	2012	Ou	RCT	AD		3	0to4	High	PRO-SYNB	PROBIOTICS	L.rhamnosus	Other	Other	65	16	64	16	High/Unclear	High/Unclear
Ou	2012	Ou	RCT	RC		3	0to4	High	PRO-SYNB	PROBIOTICS	L.rhamnosus	Other	Other	65	15	64	13	High/Unclear	High/Unclear
Ou	2012	Ou	RCT	WHZ		3	0to4	High	PRO-SYNB	PROBIOTICS	L.rhamnosus	Other	Other	65	14	64	11	High/Unclear	High/Unclear
Ou	2012	Ou	RCT	ASany	sIgE - common	1.5	any	High	PRO-SYNB	PROBIOTICS	L.rhamnosus	Other	Other	58	21	58	16	High/Unclear	High/Unclear
Prescott	2008	Taylor	RCT	AD		2.5	0to4	High	PRO-SYNB	PROBIOTICS	No L.rhamnosus	Infant only	Postnatal only	74	31	76	25	High/Unclear	Low
Prescott	2008	Taylor	RCT	AtopicAD		2.5	0to4	High	PRO-SYNB	PROBIOTICS	No L.rhamnosus	Infant only	Postnatal only	75	17	72	12	High/Unclear	Low
Prescott	2008	Taylor	RCT	WHZ		2.5	0to4	High	PRO-SYNB	PROBIOTICS	No L.rhamnosus	Infant only	Postnatal only	76	18	74	13	High/Unclear	Low
Prescott	2008	Taylor	RCT	WHZ.REC		2.5	0to4	High	PRO-SYNB	PROBIOTICS	No L.rhamnosus	Infant only	Postnatal only	74	5	77	7	High/Unclear	Low
Prescott	2008	Taylor	RCT	ASaero	SPT - aero	2.5	any	High	PRO-SYNB	PROBIOTICS	No L.rhamnosus	Infant only	Postnatal only	71	20	69	18	High/Unclear	Low
Prescott	2008	Taylor	RCT	ASany	SPT - common	2.5	any	High	PRO-SYNB	PROBIOTICS	No L.rhamnosus	Infant only	Postnatal only	71	24	69	20	High/Unclear	Low
Prescott	2008	Taylor	RCT	AScm	SPT - cow's milk	2.5	any	High	PRO-SYNB	PROBIOTICS	No L.rhamnosus	Infant only	Postnatal only	71	1	69	5	High/Unclear	Low
Prescott	2008	Taylor	RCT	ASegg	SPT - egg	2.5	any	High	PRO-SYNB	PROBIOTICS	No L.rhamnosus	Infant only	Postnatal only	71	11	69	8	High/Unclear	Low
Prescott	2008	Taylor	RCT	ASfd	SPT - food	2.5	any	High	PRO-SYNB	PROBIOTICS	No L.rhamnosus	Infant only	Postnatal only	71	14	69	12	High/Unclear	Low
Prescott	2008	Taylor	RCT	ASpn	SPT - peanut	2.5	any	High	PRO-SYNB	PROBIOTICS	No L.rhamnosus	Infant only	Postnatal only	79	11	69	6	High/Unclear	Low
Rautava	2006	Rautava 2006	RCT	AtopicAD		1	0to4	Normal/low	PRO-SYNB	PROBIOTICS	L.rhamnosus	Infant only	Postnatal only	32	4	40	8	High/Unclear	Low
Rautava	2006	Rautava 2006	RCT	FAcm		1	0to4	Normal/low	PRO-SYNB	PROBIOTICS	L.rhamnosus	Infant only	Postnatal only	32	0	40	3	High/Unclear	Low
Rautava	2006	Rautava 2006	RCT	AScm	SPT - cow's milk	1	any	Normal/low	PRO-SYNB	PROBIOTICS	L.rhamnosus	Infant only	Postnatal only	32	0	40	1	High/Unclear	Low
Rautava (A)	2012	Rautava Multi 1	RCT	AD		2	0to4	High	PRO-SYNB	PROBIOTICS	L.rhamnosus	Other	Other	73	21	31	22	Low	Low
Rautava (A)	2012	Rautava Multi 1	RCT	ASany	SPT - common	2	any	High	PRO-SYNB	PROBIOTICS	L.rhamnosus	Other	Other	76	17	33	9	Low	Low
Rautava (B)	2012	Rautava Multi 2	RCT	AD		2	0to4	High	PRO-SYNB	PROBIOTICS	No L.rhamnosus	Other	Other	70	20	31	22	Low	Low
Rautava (B)	2012	Rautava Multi 2	RCT	ASany	SPT - common	2	any	High	PRO-SYNB	PROBIOTICS	No L.rhamnosus	Other	Other	73	19	33	9	Low	Low
Roze	2012	Roze	RCT	AD		0.5	0to4	Normal/low	PRE-SYNB	SYNBIOTICS	L.rhamnosus	Infant only	Postnatal only	39	1	45	8	Low	High/Unclear
Roze	2011	Roze	RCT	AD		0.5	0to4	Normal/low	PRO-SYNB	SYNBIOTICS	L.rhamnosus	Infant only	Postnatal only	39	1	45	8	Low	High/Unclear
Scalabrin	2017	Scalabrin	RCT	AD		3	0to4	Normal/low	PRO-SYNB	PROBIOTICS	L.rhamnosus	Infant only	Postnatal only	46	19	52	16	High/Unclear	High/Unclear
Scalabrin	2017	Scalabrin	RCT	WHZ		3	0to4	Normal/low	PRO-SYNB	PROBIOTICS	L.rhamnosus	Infant only	Postnatal only	46	15	52	12	High/Unclear	High/Unclear
Scalabrin	2017	Scalabrin	RCT	RC		3	0to4	Normal/low	PRO-SYNB	PROBIOTICS	L.rhamnosus	Infant only	Postnatal only	46	0	52	2	High/Unclear	High/Unclear
Scalabrin	2017	Scalabrin	RCT	FAany		3	0to4	Normal/low	PRO-SYNB	PROBIOTICS	L.rhamnosus	Infant only	Postnatal only	46	3	52	0	High/Unclear	High/Unclear
Scalabrin	2017	Scalabrin	RCT	AD		5	5to14	Normal/low	PRO-SYNB	PROBIOTICS	L.rhamnosus	Infant only	Postnatal only	36	16	32	11	High/Unclear	High/Unclear
Scalabrin	2017	Scalabrin	RCT	WHZ		5	5to14	Normal/low	PRO-SYNB	PROBIOTICS	L.rhamnosus	Infant only	Postnatal only	36	9	32	10	High/Unclear	High/Unclear
Scalabrin	2017	Scalabrin	RCT	RC		5	5to14	Normal/low	PRO-SYNB	PROBIOTICS	L.rhamnosus	Infant only	Postnatal only	36	5	32	3	High/Unclear	High/Unclear
Scalabrin	2017	Scalabrin	RCT	FAany		5	5to14	Normal/low	PRO-SYNB	PROBIOTICS	L.rhamnosus	Infant only	Postnatal only	36	2	32	1	High/Unclear	High/Unclear
Sierra	2015	Sierra	RCT	ASany	SPT - common	1	any	Normal/low	PRE-SYNB	PREBIOTICS	No L.rhamnosus	Infant only	Postnatal only	85	6	84	9	High/Unclear	High/Unclear
Sierra	2015	Sierra	RCT	AScm	SPT - cow's milk	1	any	Normal/low	PRE-SYNB	PREBIOTICS	No L.rhamnosus	Infant only	Postnatal only	85	2	84	2	High/Unclear	High/Unclear
Sierra	2015	Sierra	RCT	ASegg	SPT - egg	1	any	Normal/low	PRE-SYNB	PREBIOTICS	No L.rhamnosus	Infant only	Postnatal only	85	6	84	1	High/Unclear	High/Unclear
Sierra	2015	Sierra	RCT	ASfd	SPT - food	1	any	Normal/low	PRE-SYNB	PREBIOTICS	No L.rhamnosus	Infant only	Postnatal only	85	6	84	3	High/Unclear	High/Unclear
Simpson	2015	Pro-PACT	RCT	AD		6	5to14	Normal/low	PRO-SYNB	PROBIOTICS	L.rhamnosus	Other	Other	81	22	82	36	High/Unclear	High/Unclear
Simpson	2015	Pro-PACT	RCT	WHZ		6	5to14	Normal/low	PRO-SYNB	PROBIOTICS	L.rhamnosus	Other	Other	132	46	142	55	High/Unclear	High/Unclear
Simpson	2015	Pro-PACT	RCT	WHZ.REC		6	5to14	Normal/low	PRO-SYNB	PROBIOTICS	L.rhamnosus	Other	Other	136	3	145	1	High/Unclear	High/Unclear
Simpson	2015	Pro-PACT	RCT	RC		6	5to14	Normal/low	PRO-SYNB	PROBIOTICS	L.rhamnosus	Other	Other	134	22	145	20	High/Unclear	High/Unclear
Simpson	2015	Pro-PACT	RCT	ASany	SPT or sIgE - common	6	any	Normal/low	PRO-SYNB	PROBIOTICS	L.rhamnosus	Other	Other	80	23	78	19	High/Unclear	High/Unclear
Soh	2009	Soh	RCT	AD		1	0to4	High	PRO-SYNB	PROBIOTICS	L.rhamnosus	Infant only	Postnatal only	124	27	121	30	High/Unclear	High/Unclear
Soh	2009	Soh	RCT	AtopicAD		1	0to4	High	PRO-SYNB	PROBIOTICS	L.rhamnosus	Infant only	Postnatal only	123	9	121	7	High/Unclear	High/Unclear
Soh	2009	Soh	RCT	AD		5	5to14	High	PRO-SYNB	PROBIOTICS	L.rhamnosus	Infant only	Postnatal only	124	31	121	38	High/Unclear	High/Unclear
Soh	2009	Soh	RCT	FAany		5	5to14	High	PRO-SYNB	PROBIOTICS	L.rhamnosus	Infant only	Postnatal only	117	1	109	1	High/Unclear	High/Unclear
Soh	2009	Soh	RCT	RC		5	5to14	High	PRO-SYNB	PROBIOTICS	L.rhamnosus	Infant only	Postnatal only	124	16	121	23	High/Unclear	High/Unclear
Soh	2009	Soh	RCT	WHZ.REC		5	5to14	High	PRO-SYNB	PROBIOTICS	L.rhamnosus	Infant only	Postnatal only	124	26	121	25	High/Unclear	High/Unclear
Soh	2009	Soh	RCT	ASaero	SPT - aero	1	any	High	PRO-SYNB	PROBIOTICS	L.rhamnosus	Infant only	Postnatal only	123	24	121	20	High/Unclear	High/Unclear
Soh	2009	Soh	RCT	ASany	SPT - common	1	any	High	PRO-SYNB	PROBIOTICS	L.rhamnosus	Infant only	Postnatal only	123	30	121	23	High/Unclear	High/Unclear
Soh	2009	Soh	RCT	ASegg	SPT - egg	1	any	High	PRO-SYNB	PROBIOTICS	L.rhamnosus	Infant only	Postnatal only	123	6	120	6	High/Unclear	High/Unclear
Soh	2009	Soh	RCT	ASfd	SPT - food	1	any	High	PRO-SYNB	PROBIOTICS	L.rhamnosus	Infant only	Postnatal only	123	7	120	6	High/Unclear	High/Unclear
Soh	2009	Soh	RCT	total IgE		1	any	High	PRO-SYNB	PROBIOTICS	L.rhamnosus	Infant only	Postnatal only	124		121		High/Unclear	High/Unclear	18.76	3.173	23.13	3.628
Taylor	2007	Taylor	RCT	FAany		1	0to4	High	PRO-SYNB	PROBIOTICS	No L.rhamnosus	Infant only	Postnatal only	88	14	87	9	Low	Low
Taylor	2012	Taylor	RCT	AD		5	5to14	High	PRO-SYNB	PROBIOTICS	No L.rhamnosus	Infant only	Postnatal only	62	19	56	9	High/Unclear	Low
Taylor	2012	Taylor	RCT	AtopicAD		5	5to14	High	PRO-SYNB	PROBIOTICS	No L.rhamnosus	Infant only	Postnatal only	60	13	54	7	High/Unclear	Low
Taylor	2012	Taylor	RCT	FAany		5	5to14	High	PRO-SYNB	PROBIOTICS	No L.rhamnosus	Infant only	Postnatal only	64	8	51	3	High/Unclear	Low
Taylor	2012	Taylor	RCT	RC		5	5to14	High	PRO-SYNB	PROBIOTICS	No L.rhamnosus	Infant only	Postnatal only	58	8	50	9	High/Unclear	Low
Taylor	2012	Taylor	RCT	WHZ		5	5to14	High	PRO-SYNB	PROBIOTICS	No L.rhamnosus	Infant only	Postnatal only	64	14	53	6	High/Unclear	Low
Taylor	2012	Taylor	RCT	WHZ.REC		5	5to14	High	PRO-SYNB	PROBIOTICS	No L.rhamnosus	Infant only	Postnatal only	66	8	57	5	High/Unclear	Low
Van der Aa	2010	Van der Aa	RCT	WHZ		1	0to4	High	PRO-SYNB	SYNBIOTICS	No L.rhamnosus	Infant only	Postnatal only	36	1	39	12	Low	High/Unclear
Van der Aa	2010	Van der Aa	RCT	WHZ.REC		1	0to4	High	PRE-SYNB	SYNBIOTICS	No L.rhamnosus	Infant only	Postnatal only	36	5	39	13	Low	High/Unclear
Van der Aa	2010	Van der Aa	RCT	WHZ.REC		1	0to4	High	PRO-SYNB	SYNBIOTICS	No L.rhamnosus	Infant only	Postnatal only	36	5	39	13	Low	High/Unclear
Van des Aa	2010	Van der Aa	RCT	ASaero	sIgE - aero	1	any	High	PRO-SYNB	SYNBIOTICS	No L.rhamnosus	Infant only	Postnatal only	29	3	33	5	High/Unclear	High/Unclear
West	2009	West	RCT	AD		1	0to4	Normal/low	PRO-SYNB	PROBIOTICS	L.rhamnosus	Infant only	Postnatal only	84	9	87	19	High/Unclear	Low
West	2009	West	RCT	RC		1	0to4	Normal/low	PRO-SYNB	PROBIOTICS	L.rhamnosus	Infant only	Postnatal only	84	1	87	0	High/Unclear	Low
West	2009	West	RCT	WHZ		1	0to4	Normal/low	PRO-SYNB	PROBIOTICS	L.rhamnosus	Infant only	Postnatal only	84	2	87	5	High/Unclear	Low
West	2009	West	RCT	AD		8	5to14	High	PRO-SYNB	PROBIOTICS	L.rhamnosus	Infant only	Postnatal only	59	16	62	19	High/Unclear	Low
West	2009	West	RCT	AtopicAD		8	5to14	High	PRO-SYNB	PROBIOTICS	L.rhamnosus	Infant only	Postnatal only	53	4	59	7	High/Unclear	Low
West	2009	West	RCT	FAany		8	5to14	Normal/low	PRO-SYNB	PROBIOTICS	L.rhamnosus	Infant only	Postnatal only	59	5	62	6	High/Unclear	Low
West	2009	West	RCT	LFrev		8	5to14	Normal/low	PRO-SYNB	PROBIOTICS	L.rhamnosus	Infant only	Postnatal only	58	1	59	5	High/Unclear	Low
West	2009	West	RCT	RC		8	5to14	Normal/low	PRO-SYNB	PROBIOTICS	L.rhamnosus	Infant only	Postnatal only	58	8	62	6	High/Unclear	Low
West	2009	West	RCT	WHZ		8	5to14	High	PRO-SYNB	PROBIOTICS	L.rhamnosus	Infant only	Postnatal only	59	22	62	14	High/Unclear	Low
West	2009	West	RCT	WHZ.REC		8	5to14	High	PRO-SYNB	PROBIOTICS	L.rhamnosus	Infant only	Postnatal only	59	12	62	12	High/Unclear	Low
West	2009	West	RCT	ASaero	sIgE - aero	8	any	Normal/low	PRO-SYNB	PROBIOTICS	L.rhamnosus	Infant only	Postnatal only	58	15	60	14	High/Unclear	Low
West	2009	West	RCT	ASany	sIgE - common	1	any	Normal/low	PRO-SYNB	PROBIOTICS	L.rhamnosus	Infant only	Postnatal only	81	7	82	9	High/Unclear	Low
West	2009	West	RCT	ASfd	sIgE - food	8	any	Normal/low	PRO-SYNB	PROBIOTICS	L.rhamnosus	Infant only	Postnatal only	54	9	60	10	High/Unclear	Low
Wickens	2013	Wickens	RCT	Fev1_percFVC		6	5to14	High	PRO-SYNB	PROBIOTICS	No L.rhamnosus	Other	Other	142		73		Low	Low	82.8099	0.792192	84.1	0.765306
Wickens	2013	Wickens	RCT	total IgE		6	any	High	PRO-SYNB	PROBIOTICS	No L.rhamnosus	Other	Other	194		98		Low	Low	87.3469	26.5685	104.3	19.6429
Wickens (2A)	2013	Wickens 2A	RCT	AD		6	5to14	High	PRO-SYNB	PROBIOTICS	L.rhamnosus	Other	Other	112	26	64.5	21.5	Low	Low
Wickens (2A)	2013	Wickens 2A	RCT	LFrev		6	5to14	High	PRO-SYNB	PROBIOTICS	L.rhamnosus	Other	Other	52	8	31	4.5	Low	Low
Wickens (2A)	2013	Wickens 2A	RCT	RC		6	5to14	High	PRO-SYNB	PROBIOTICS	L.rhamnosus	Other	Other	134	22	144	22	Low	Low
Wickens (2A)	2013	Wickens 2A	RCT	WHZ		6	5to14	High	PRO-SYNB	PROBIOTICS	L.rhamnosus	Other	Other	134	35	144	41	Low	Low
Wickens (2A)	2013	Wickens 2A	RCT	WHZ.REC		6	5to14	High	PRO-SYNB	PROBIOTICS	L.rhamnosus	Other	Other	134	31	144	35	Low	Low
Wickens (2B)	2013	Wickens 2B	RCT	AD		6	5to14	High	PRO-SYNB	PROBIOTICS	No L.rhamnosus	Other	Other	133	41	64.5	21.5	Low	Low
Wickens (2B)	2013	Wickens 2B	RCT	LFrev		6	5to14	High	PRO-SYNB	PROBIOTICS	No L.rhamnosus	Other	Other	60	6	31	4.5	Low	Low
Wickens (2B)	2013	Wickens 2B	RCT	RC		6	5to14	High	PRO-SYNB	PROBIOTICS	No L.rhamnosus	Other	Other	144	21	144	22	Low	Low
Wickens (2B)	2013	Wickens 2B	RCT	WHZ		6	5to14	High	PRO-SYNB	PROBIOTICS	No L.rhamnosus	Other	Other	144	40	144	41	Low	Low
Wickens (2B)	2013	Wickens 2B	RCT	WHZ.REC		6	5to14	High	PRO-SYNB	PROBIOTICS	No L.rhamnosus	Other	Other	144	37	144	35	Low	Low
Wickens (A)	2008	Wickens 1A	RCT	ASany	SPT - common	2	any	High	PRO-SYNB	PROBIOTICS	L.rhamnosus	Other	Other	141	30	73	21	Low	Low
Wickens (A)	2008	Wickens 1A	RCT	ASfd	SPT - food	2	any	High	PRO-SYNB	PROBIOTICS	L.rhamnosus	Other	Other	141	22	73	16	Low	Low
Wickens (A)	2012	Wickens 2A	RCT	AD		4	0to4	High	PRO-SYNB	PROBIOTICS	L.rhamnosus	Other	Other	157	51	80	39	Low	Low
Wickens (A)	2012	Wickens 2A	RCT	AtopicAD		4	0to4	High	PRO-SYNB	PROBIOTICS	L.rhamnosus	Other	Other	157	28	80	22	Low	Low
Wickens (A)	2012	Wickens 2A	RCT	RC		4	0to4	High	PRO-SYNB	PROBIOTICS	L.rhamnosus	Other	Other	136	8	72	11	Low	Low
Wickens (A)	2012	Wickens 2A	RCT	WHZ		4	0to4	High	PRO-SYNB	PROBIOTICS	L.rhamnosus	Other	Other	157	86	80	51	Low	Low
Wickens (B)	2008	Wickens 1B	RCT	ASany	SPT - common	2	any	High	PRO-SYNB	PROBIOTICS	No L.rhamnosus	Other	Other	149	35	73	21	Low	Low
Wickens (B)	2008	Wickens 1B	RCT	ASfd	SPT - food	2	any	High	PRO-SYNB	PROBIOTICS	No L.rhamnosus	Other	Other	149	22	73	16	Low	Low
Wickens (B)	2012	Wickens 2B	RCT	AD		4	0to4	High	PRO-SYNB	PROBIOTICS	No L.rhamnosus	Other	Other	158		80		Low	Low
Wickens (B)	2012	Wickens 2B	RCT	AtopicAD		4	0to4	High	PRO-SYNB	PROBIOTICS	No L.rhamnosus	Other	Other	158		80		Low	Low
Wickens (B)	2012	Wickens 2B	RCT	RC		4	0to4	High	PRO-SYNB	PROBIOTICS	No L.rhamnosus	Other	Other	158		72		Low	Low
Wickens (B)	2012	Wickens 2B	RCT	WHZ		4	0to4	High	PRO-SYNB	PROBIOTICS	No L.rhamnosus	Other	Other	158		80		Low	Low
Ziegler	2007	Ziegler	RCT	AD		0.3	0to4	Normal/low	PRE-SYNB	PREBIOTICS	PREBIO.only	Infant only	Postnatal only	106		58		High/Unclear	High/Unclear

## Sheet: VITAMINS-INTERV
FIRST AUTHOR	YEAR OF PUBLICATION	STUDY NAME	STUDY DESIGN	VITAMIN INTERVENTION	SPECIFIC OUTCOME	OUTCOME SUBGROUP	AGE AT OUTCOME GROUP	n.inter	N.inter	n.ctrl	N.ctrl	RISK OF BIAS	OVERALL RISK OF BIAS	CONFLICT OF INTEREST BIAS
AUTHOR	YEAR	STUDY	design	Intervention	spec.out	sub.out	age.out	n.inter	N.inter	n.ctrl	N.ctrl	RISK OF BIAS	overall.risk	CoI
Aage	2015	Aage	RCT	VIT-A	AD	AD	5to14	12	748	15	730	Unclear-high	High	Low
Aage	2015	Aage	RCT	VIT-A	ASany	SPT	any	121	724	107	706	Unclear-high	High	Low
Aage	2015	Aage	RCT	VIT-A	WHZ	WHZ	5to14	57	748	46	730	Unclear-high	High	Low
Chawes	2016	COPSAC	RCT	VIT-D	AD	AD	0to4	68	295	72	286	Low	Low	Low
Chawes	2016	COPSAC	RCT	VIT-D	ASany	SPT	any	24	294	19	283	Low	Low	Low
Chawes	2016	COPSAC	RCT	VIT-D	WHZ.REC	WHZ.REC	0to4	47	295	57	286	Low	Low	Low
Checkley	2011	Checkley	RCT	VIT-A	WHZ	WHZ	5to14	90	536	92	476	Unclear-high	High	Low
Checkley	2011	Checkley	RCT	B-Carotene	WHZ	WHZ	5to14	79	539	92	476	Unclear-high	High	Low
Checkley	2011	Checkley	RCT	VIT-A	WHZ.REC	WHZ.REC	5to14	6	536	2	476	Unclear-high	High	Low
Checkley	2011	Checkley	RCT	B-Carotene	WHZ.REC	WHZ.REC	5to14	3	539	2	476	Unclear-high	High	Low
Czeizel	1994	Czeizel	RCT	Multi-VIt.	AD	AD	0to4	15	1628	4	1606	Unclear-high	Unclear-high	Low
Czeizel	1994	Czeizel	RCT	Multi-VIt.	FA	FA	0to4	7	1628	8	1606	Unclear-high	Unclear-high	Low
Czeizel	1994	Czeizel	RCT	Multi-VIt.	WHZ	WHZ	0to4	7	1628	3	1606	Unclear-high	Unclear-high	Low
Czeizel	1994	Czeizel	RCT	Multi-VIt.	WHZ.REC	WHZ.REC	0to4	4	1628	1	1606	Unclear-high	Unclear-high	Low
Goldring	2013	Goldring	RCT	VIT-D	AD	AD	0to4	30	102	15	49	Low	Low	Low
Goldring	2013	Goldring	RCT	VIT-D	ASaero	SPT	any	11	68	7	27	Low	Low	Low
Goldring	2013	Goldring	RCT	VIT-D	FA	FA	0to4	12	102	3	49	Low	Low	Low
Goldring	2013	Goldring	RCT	VIT-D	WHZ	WHZ	0to4	26	108	14	50	Low	Low	Low
Goldring	2013	Goldring	RCT	VIT-D	WHZ.REC	WHZ.REC	0to4	17	108	7	50	Low	Low	Low
Grant	2016	Grant	RCT	VIT-D	ASaero	SPT	any	2	119	6	65	Low	Low	Low
Grant	2016	Grant	RCT	VIT-D	WHZ	WHZ	0to4	37	156	19	80	Low	Low	Low
Grant	2016	Grant	RCT	VIT-D	WHZ.REC	WHZ.REC	0to4	3	156	9	80	Low	Low	Low
Greenough	2010	Greenough	RCT	VIT-C and E	AD	AD	0to4	98	386	86	366	Unclear-high	Unclear-high	Low
Greenough	2010	Greenough	RCT	VIT-C and E	WHZ	WHZ	0to4	90	386	103	366	Unclear-high	Unclear-high	Low
Greenough	2010	Greenough	RCT	VIT-C and E	WHZ.REC	WHZ.REC	0to4	15	386	17	366	Unclear-high	Unclear-high	Low
Kiraly	2013	Kiraly	RCT	VIT-A	ASaero	SPT	any	22	131	18	132
Litonjua	2016	Litonjua	RCT	VIT-D	AD	AD	0to4	83	405	89	401	Low	Low	Low
Litonjua	2016	Litonjua	RCT	VIT-D	ASany	sIgE	any	146	279	147	264	Unclear-high	Unclear-high	Low
Litonjua	2016	Litonjua	RCT	VIT-D	WHZ.REC	WHZ.REC	0to4	98	405	120	401	Low	Low	Low
McEvoy	2014	McEvoy	RCT	VIT-C and E	WHZ	WHZ	0to4	15	70	31	77

## Sheet: MULTIFACETED-INTERV
FIRST AUTHOR	YEAR OF PUBLICATION	STUDY NAME	STUDY DESIGN	TYPE OF INTERVENTION	SPECIFIC OUTCOME	OUTCOME SUBGROUP	Age at outcome in years (average if possible)	AGE AT OUTCOME GROUP	DISEASE RISK GROUP		INTERVENTION	INTERVENTION SUBGROUP	INTERVENTON SUBGROUP	TIME OF INTERVENTION	N.inter	n.inter	N.ctrl	n.ctrl	OVERALL RISK OF BIAS Low Risk of Bias overall, if there is a Low Risk of Bias on all of the key domains: Assessment Bias Selection Bias Attrition Bias	OVERALL RISK OF BIAS GROUP	CONFICT OF INTERST BIAS	CONFLICT OF INTEREST BIAS GROUP	Mean.inter	SD.inter	Mean.ctrl	SD.ctrl
AUTHOR	YEAR	STUDY	design	Type of Intervention	spec.out	out.subg	Age at outcome in years (average if possible)	age.out	disease.risk	Selected population? (e.g., specific racial group; formula feeding from very young age, etc - something unrepresentative of UK)	exp	exp.subg	interv.subg	PRE-POST-PARTUM	N.inter	n.inter	N.ctrl	n.ctrl	OVERALL RISK OF BIAS Low Risk of Bias overall, if there is a Low Risk of Bias on all of the key domains: Assessment Bias Selection Bias Attrition Bias	overall.risk	Risk of Bias due to potential conflict of interest [No evidence of industry involvement = Low Risk of Bias]. Look at the the funding/acknowledgements/conflict of interest sections of the paper, if available	CoI	Mean.inter	SD.inter	Mean.ctrl	SD.ctrl
Arshad	2003	Isle of Wight Prevention Study	RCT	Multifaceted	TotIgE		8	any	High	Representative population	MULTI			post	55		62		Unclear	High/Unclear	Low	Low	103.6	5.5	91.69	5.4
Arshad	2003	Isle of Wight Prevention Study	RCT	Multifaceted	BHR		8	5to14	High	Representative population	MULTI			post	52	17	58	25	Unclear	High/Unclear	Low	Low
Arshad	2003	Isle of Wight Prevention Study	RCT	Multifaceted	ASaero		8	any	High	Representative population	MULTI			post	55	11	62	28	Unclear	High/Unclear	Low	Low
Arshad	2003	Isle of Wight Prevention Study	RCT	Multifaceted	ASfd		8	any	High	Representative population	MULTI			post	55	0	62	5	Unclear	High/Unclear	Low	Low
Arshad	2003	Isle of Wight Prevention Study	RCT	Multifaceted	Wheeze		8	5to14	High	Representative population	MULTI			post	58	8	62	17	Unclear	High/Unclear	Low	Low
Arshad	2007	Isle of Wight Prevention Study	RCT	Multifaceted	AD		8	5to14	High	Representative population	MULTI			post	58	21	62	29	Unclear	High/Unclear	Low	Low
Arshad	2007	Isle of Wight Prevention Study	RCT	Multifaceted	ADatop		8	5to14	High	Representative population	MULTI			post	55	5	62	17	Unclear	High/Unclear	Low	Low
Arshad	2007	Isle of Wight Prevention Study	RCT	Multifaceted	AR		8	5to14	High	Representative population	MULTI			post	58	19	62	28	Unclear	High/Unclear	Low	Low
Arshad	2007	Isle of Wight Prevention Study	RCT	Multifaceted	ARatop		8	5to14	High	Representative population	MULTI			post	55	7	62	19	Unclear	High/Unclear	Low	Low
Arshad	2007	Isle of Wight Prevention Study	RCT	Multifaceted	FAany		8	5to14	High	Representative population	MULTI			post	58	11	62	26	Unclear	High/Unclear	Low	Low
Arshad	2007	Isle of Wight Prevention Study	RCT	Multifaceted	RecWheeze		8	5to14	High	Representative population	MULTI			post	58	23	62	30	Unclear	High/Unclear	Low	Low
Arshad	2007	Isle of Wight Prevention Study	RCT	Multifaceted	RecWheeze.atop		8	5to14	High	Representative population	MULTI			post	55	7	62	16	Unclear	High/Unclear	Low	Low
Arshad	1992	Isle of Wight Prevention Study	RCT	Multifaceted	AD		1	0to4	High	Representative	MULTI		envir.control	post	58	4	62	12	Unclear	High/Unclear	Unclear	High/Unclear
Arshad	1992	Isle of Wight Prevention Study	RCT	Multifaceted	FAany		1	0to4	High	Representative	MULTI			post	58	2	62	7	Unclear	High/Unclear	Unclear	High/Unclear
Arshad	1992	Isle of Wight Prevention Study	RCT	Multifaceted	RecWheeze		1	0to4	High	Representative	MULTI			post	58	4	62	12	Unclear	High/Unclear	Unclear	High/Unclear
Arshad	1992	Isle of Wight Prevention Study	RCT	Multifaceted	ASany		1	any	High	Representative	MULTI			post	58	2	62	6	Unclear	High/Unclear	Unclear	High/Unclear
Becker	2004	CAPPS	RCT	Multifaceted	RecWheeze		1	0to4	High	Representative	MULTI			post	251	38	242	46	Low	Low	Low	Low
Becker	2004	CAPPS	RCT	Multifaceted	ASany		1	any	High	Representative	MULTI			post	251	52	242	49	Low	Low	Low	Low
Carlsten	2013	CAPPS	RCT	Multifaceted	AD		7	5to14	High	Representative	MULTI			post	198	43	175	42	High	High/Unclear	Low	Low
Chan-Yeung	2000	Canadian asthma primary prevention study (CAPPS)	RCT	Multifaceted	FEV1perc_pred		7	5to14	High	Representative population	MULTI	pHF-whey	Multifaceted intervention	post	178		202		Low	Low	Low	Low	93.3	12.5	92.7	11.3
Chan-Yeung	2000	Canadian asthma primary prevention study (CAPPS)	RCT	Multifaceted	AR		1	0to4	High	Representative population	MULTI	pHF-whey	Multifaceted intervention	post	251	42	242	66	Low	Low	Low	Low
Chan-Yeung	2000	Canadian asthma primary prevention study (CAPPS)	RCT	Multifaceted	ASaero		1	any	High	Representative population	MULTI	pHF-whey	Multifaceted intervention	post	251	11	242	11	Low	Low	Low	Low
Chan-Yeung	2005	CAPPS	RCT	Multifaceted	BHR		7	5to14	High	Representative	MULTI			post	202	141	178	117	Low	Low	Low	Low
Chan-Yeung	2005	CAPPS	RCT	Multifaceted	AR		7	5to14	High	Representative	MULTI			post	202	64	178	49	Low	Low	Low	Low
Chan-Yeung	2005	CAPPS	RCT	Multifaceted	RecWheeze		7	5to14	High	Representative	MULTI			post	202	30	178	41	Low	Low	Low	Low
Chan-Yeung	2005	CAPPS	RCT	Multifaceted	Wheeze		7	5to14	High	Representative	MULTI			post	202	35	178	52	Low	Low	Low	Low
Halmerbauer	2002	SPACE *	RCT	Multifaceted	ASany		1	any	High	Representative population	MULTI			post	322	20	300	32	Unclear	High/Unclear	Low	Low
Halmerbauer	2002	SPACE *	RCT	Multifaceted	ASegg		1	any	High	Representative population	MULTI			post	322	15	300	16	Unclear	High/Unclear	Low	Low
Halmerbauer	2002	SPACE*	RCT	Multifaceted	AScm		1	any	High	Representative population	MULTI			post	322	4	300	8	Unclear	High/Unclear	Low	Low
Halmerbauer	2003	SPACE	RCT	Multifaceted	AD		1	0to4	High	Representative	MULTI		envir.control	post	349	40	347	46	High	High/Unclear	Low	Low
Halmerbauer	2003	SPACE	RCT	Multifaceted	FAany		1	0to4	High	Representative	MULTI			post	349	18	347	14	High	High/Unclear	Low	Low
Halmerbauer	2003	SPACE	RCT	Multifaceted	RecWheeze		1	0to4	High	Representative	MULTI			post	349	25	347	23	High	High/Unclear	Low	Low
Halmerbauer	2003	SPACE	RCT	Multifaceted	Wheeze		1	0to4	High	Representative	MULTI			post	349	70	347	70	High	High/Unclear	Low	Low
Hide	1996	Isle of Wight Prevention Study	RCT	Multifaceted	AR		4	0to4	High	Representative population	MULTI			post	58	6	62	11	Unclear	High/Unclear	Low	Low
Hide	1996	Isle of Wight Prevention Study	RCT	Multifaceted	AScm		4	any	High	Representative population	MULTI			post	58	0	62	3	Unclear	High/Unclear	Low	Low
Hide	1996	Isle of Wight Prevention Study	RCT	Multifaceted	ASegg		4	any	High	Representative population	MULTI			post	58	2	62	4	Unclear	High/Unclear	Low	Low
Kuikka	1995	POYSA	RCT	Multifaceted	ASaero		10	any	High	Representative	MULTI			post	35	14	33	13	Unclear	High/Unclear	Low	Low
Lovegrove	1994	Lovegrove	RCT	Multifaceted	AD		1	0to4	High	Representative	MULTI		nonenvir.control	pre/post	12	5	14	8	Unclear	High/Unclear	High	High/Unclear
Matthew	1977	Matthew	RCT	Multifaceted	AD		1	0to4	High	Representative	MULTI		envir.control	post	23	3	19	9	High	High/Unclear	Unclear	High/Unclear
Matthew	1977	Matthew	RCT	Multifaceted	ASany		1	any	High	Representative	MULTI			post	23	12	19	13	High	High/Unclear	Unclear	High/Unclear
Matthew	1977	Matthew	RCT	Multifaceted	AScm		1	any	High	Representative	MULTI			post	23	6	19	9	High	High/Unclear	Unclear	High/Unclear
Poysa	1989	POYSA	RCT	Multifaceted	AD		5	5to14	High	Representative	MULTI			post	37	9	33	7	Unclear	High/Unclear	Low	Low
Poysa	1991	POYSA	RCT	Multifaceted	AC		10	5to14	High	Representative	MULTI			post	35	8	33	3	Unclear	High/Unclear	Low	Low
Poysa	1991	POYSA	RCT	Multifaceted	AR		10	5to14	High	Representative	MULTI			post	35	5	33	8	Unclear	High/Unclear	Low	Low
Poysa	1991	POYSA	RCT	Multifaceted	FAany		10	5to14	High	Representative	MULTI			post	35	4	33	1	Unclear	High/Unclear	Low	Low
Poysa	1991	POYSA	RCT	Multifaceted	RecWheeze		10	5to14	High	Representative	MULTI			post	35	3	33	2	Unclear	High/Unclear	Low	Low
Schonberger	2005	PREVASC	RCT	Multifaceted	AD		2	0to4	High	Representative population	MULTI		envir.control	post	212	58	200	46	Unclear	High/Unclear	Unclear	High/Unclear
Schonberger	2005	PREVASC	RCT	Multifaceted	RecWheeze		2	0to4	High	Representative population	MULTI	eHF-whey	Multifaceted intervention	post	189	49	184	47	Unclear	High/Unclear	Unclear	High/Unclear
Schonberger	2005	PREVASC	RCT	Multifaceted	ASany		2	any	High	Representative population	MULTI	eHF-whey	Multifaceted intervention	post	197	13	208	11	Unclear	High/Unclear	Unclear	High/Unclear
Scott	2012	Isle of Wight prevention cohort	RCT	Multifaceted	AD		18	15plus	High	Representative population	MULTI			post	56	7	58	15	Unclear	High/Unclear	Low	Low
Scott	2012	Isle of Wight prevention cohort	RCT	Multifaceted	RecWheeze		18	15plus	High	Representative population	MULTI			post	56	13	58	20	Unclear	High/Unclear	Low	Low
Scott	2012	Isle of Wight prevention cohort	RCT	Multifaceted	RecWheeze.atop		18	15plus	High	Representative population	MULTI			post	48	4	55	13	Unclear	High/Unclear	Low	Low
Scott	2012	Isle of Wight prevention cohort	RCT	Multifaceted	RecWheeze.Natop		18	15plus	High	Representative population	MULTI			post	48	2	55	2	Unclear	High/Unclear	Low	Low
Shao	2006	Shao	RCT	Multifaceted	AD		1.5	0to4	High	Representative	MULTI		nonenvir.control	post	23	4	23	9	Unclear	High/Unclear	Unclear	High/Unclear
Shao	2006	Shao*	RCT	Multifaceted	ASfd		1.5	any	High	Representative	MULTI			post	23	3	23	9	Unclear	High/Unclear	Unclear	High/Unclear
Wong	2013	CAPPS	RCT	Multifaceted	AScm		15	any	High	Representative	MULTI			post	176	3	149	2	High	High/Unclear	Low	Low
Wong	2013	CAPPS	RCT	Multifaceted	ASegg		15	any	High	Representative	MULTI			post	176	4	149	2	High	High/Unclear	Low	Low
Wong	2013	CAPPS	RCT	Multifaceted	ASpn		15	any	High	Representative	MULTI			post	176	19	149	16	High	High/Unclear	Low	Low
Zeiger	1994	Zeiger 1994	RCT	Multifaceted	AD		7	5to14	High	Representative population	MULTI	eHF-casein	Multifaceted intervention	post	59	9	106	24	High	High/Unclear	Unclear	High/Unclear
Zeiger	1994	Zeiger 1994	RCT	Multifaceted	AR		7	5to14	High	Representative population	MULTI	eHF-casein	Multifaceted intervention	post	59	21	106	47	High	High/Unclear	Unclear	High/Unclear
Zeiger	1994	Zeiger 1994	RCT	Multifaceted	FAany		7	5to14	High	Representative population	MULTI	eHF-casein	Multifaceted intervention	post	59	6	106	24	High	High/Unclear	Unclear	High/Unclear
Zeiger	1994	Zeiger 1994	RCT	Multifaceted	RecWheeze		7	5to14	High	Representative population	MULTI	eHF-casein	Multifaceted intervention	post	59	21	106	46	High	High/Unclear	Unclear	High/Unclear
Zeiger	1994	Zeiger 1994	RCT	Multifaceted	ASaero		7	any	High	Representative population	MULTI	eHF-casein	Multifaceted intervention	post	59	23	106	56	High	High/Unclear	Unclear	High/Unclear

## Sheet: ALLERGENIC FOOD AVOIDANC-INTERV
FIRST AUTHOR	YEAR OF PUBLICATION		STUDY DESIGN	TYPE OF INTERVENTION	SPECIFIC OUTCOME	OUTCOME SUBGROUP	AGE AT OUTCOME	AGE AT OUTCOME GROUP	DISEASE RISK	INTERVENTION	N.inter	n.inter	N.ctrl	n.ctrl	OVERALL RISK OF BIAS	OVERALL RISK OF BIAS GROUP	CONFLICT OF INTEREST BIAS	CONFLICT OF INTEREST BIAS GROUP	TIME OF MULTIFACETED INTERVENTION
AUTHOR	YEAR	STUDY	design	Type of Intervention	spec.out	subgroup analysis (if applicable)	age at outcome assessment (last FU)	age.out	disease.risk	exp	N.inter	n.inter	N.ctrl	n.ctrl	OVERALL RISK OF BIAS Low Risk of Bias overall, if there is a Low Risk of Bias on all of the key domains: Assessment Bias Selection Bias Attrition Bias	overall.risk	Risk of Bias due to potential conflict of interest [No evidence of industry involvement = Low Risk of Bias]. Look at the the funding/acknowledgements/conflict of interest sections of the paper, if available	CoI	PRE-POST-PARTUM
Arshad	2003	Isle of Wight Prevention Study	RCT	Multifaceted	ASaero		8	any	High	MULTI	55	11	62	28	Unclear	High/Unclear	Low	Low	post
Arshad	2003	Isle of Wight Prevention Study	RCT	Multifaceted	ASfd		8	any	High	MULTI	55	0	62	5	Unclear	High/Unclear	Low	Low	post
Arshad	2003	Isle of Wight Prevention Study	RCT	Multifaceted	BHR		8	5to14	High	MULTI	52	17	58	25	Unclear	High/Unclear	Low	Low	post
Arshad	2003	Isle of Wight Prevention Study	RCT	Multifaceted	Wheeze		8	5to14	High	MULTI	58	8	62	17	Unclear	High/Unclear	Low	Low	post
Arshad	2007	Isle of Wight Prevention Study	RCT	Multifaceted	AD		8	5to14	High	MULTI	58	21	62	29	Unclear	High/Unclear	Low	Low	post
Arshad	2007	Isle of Wight Prevention Study	RCT	Multifaceted	ADatop		8	5to14	High	MULTI	55	5	62	17	Unclear	High/Unclear	Low	Low	post
Arshad	2007	Isle of Wight Prevention Study	RCT	Multifaceted	RecWheeze		8	5to14	High	MULTI	58	23	62	30	Unclear	High/Unclear	Low	Low	post
Arshad	2007	Isle of Wight Prevention Study	RCT	Multifaceted	RecWheeze.atop		8	5to14	High	MULTI	55	7	62	16	Unclear	High/Unclear	Low	Low	post
Arshad	2007	Isle of Wight Prevention Study	RCT	Multifaceted	FA-ANY		8	5to14	High	MULTI	58	11	62	26	Unclear	High/Unclear	Low	Low	post
Arshad	2007	Isle of Wight Prevention Study	RCT	Multifaceted	AR		8	5to14	High	MULTI	58	19	62	28	Unclear	High/Unclear	Low	Low	post
Arshad	2007	Isle of Wight Prevention Study	RCT	Multifaceted	ARatop		8	5to14	High	MULTI	55	7	62	19	Unclear	High/Unclear	Low	Low	post
Arshad	1992	Isle of Wight Prevention Study	RCT	Multifaceted	AD		1	0to4	High	MULTI	58	4	62	12	Unclear	High/Unclear	Unclear	High/Unclear	post
Arshad	1992	Isle of Wight Prevention Study	RCT	Multifaceted	ASany		1	any	High	MULTI	58	2	62	6	Unclear	High/Unclear	Unclear	High/Unclear	post
Arshad	1992	Isle of Wight Prevention Study	RCT	Multifaceted	RecWheeze		1	0to4	High	MULTI	58	4	62	12	Unclear	High/Unclear	Unclear	High/Unclear	post
Arshad	1992	Isle of Wight Prevention Study	RCT	Multifaceted	FA-ANY		1	0to4	High	MULTI	58	2	62	7	Unclear	High/Unclear	Unclear	High/Unclear	post
Becker	2004	CAPPS	RCT	Multifaceted	ASany		1	any	High	MULTI	251	52	242	49	Low	Low	Low	Low	post
Becker	2004	CAPPS	RCT	Multifaceted	RecWheeze		1	0to4	High	MULTI	251	38	242	46	Low	Low	Low	Low	post
Carlsten	2013	CAPPS	RCT	Multifaceted	AD		7	5to14	High	MULTI	198	43	175	42	High	High/Unclear	Low	Low	post
Chan-Yeung	2000	CAPPS	RCT	Multifaceted	ASaero		1	any	High	MULTI	251	11	242	11	Low	Low	Low	Low	post
Chan-Yeung	2000	CAPPS	RCT	Multifaceted	AR		1	0to4	High	MULTI	251	42	242	66	Low	Low	Low	Low	post
Chan-Yeung	2005	CAPPS	RCT	Multifaceted	RecWheeze		7	5to14	High	MULTI	202	30	178	41	Low	Low	Low	Low	post
Chan-Yeung	2005	CAPPS	RCT	Multifaceted	Wheeze		7	5to14	High	MULTI	202	35	178	52	Low	Low	Low	Low	post
Chan-Yeung	2005	CAPPS	RCT	Multifaceted	BHR		7	5to14	High	MULTI	202	141	178	117	Low	Low	Low	Low	post
Chan-Yeung	2005	CAPPS	RCT	Multifaceted	AR		7	5to14	High	MULTI	202	64	178	49	Low	Low	Low	Low	post
Falth-Magnusson	1987	Falth-Magnusson	RCT	AFA alone	AD		1.5	0to4	High	AFA	76	22	95	21	High	High/Unclear	Unclear	High/Unclear
Falth-Magnusson	1987	Falth-Magnusson	RCT	AFA alone	AScm	SPT-CM	1.5	any	High	AFA	77	1	96	0	High	High/Unclear	Unclear	High/Unclear
Falth-Magnusson	1987	Falth-Magnusson	RCT	AFA alone	ASegg	SPT-EGG	1.5	any	High	AFA	77	7	96	7	High	High/Unclear	Unclear	High/Unclear
Falth-Magnusson	1987	Falth-Magnusson	RCT	AFA alone	RecWheeze		1.5	0to4	High	AFA	76	3	95	1	High	High/Unclear	Unclear	High/Unclear
Falth-Magnusson	1987	Falth-Magnusson	RCT	AFA alone	FA-ANY		1.5	0to4	High	AFA	76	4	95	3	High	High/Unclear	Unclear	High/Unclear
Falth-Magnusson	1987	Falth-Magnusson	RCT	AFA alone	AR		1.5	0to4	High	AFA	76	3	95	0	High	High/Unclear	Unclear	High/Unclear
Falth-Magnusson	1992	Falth-Magnusson	RCT	AFA alone	AD		5	5to14	High	AFA	66	29	89	24	High	High/Unclear	Unclear	High/Unclear
Falth-Magnusson	1992	Falth-Magnusson	RCT	AFA alone	ASany	SPT-ANY	5	any	High	AFA	64	12	91	24	High	High/Unclear	Unclear	High/Unclear
Falth-Magnusson	1992	Falth-Magnusson	RCT	AFA alone	RecWheeze		5	5to14	High	AFA	66	29	89	25	High	High/Unclear	Unclear	High/Unclear
Falth-Magnusson	1992	Falth-Magnusson	RCT	AFA alone	FA-ANY		5	5to14	High	AFA	84	16	114	20	High	High/Unclear	Unclear	High/Unclear
Falth-Magnusson	1992	Falth-Magnusson	RCT	AFA alone	FA-EGG		5	5to14	High	AFA	84	6	114	0	High	High/Unclear	Unclear	High/Unclear
Falth-Magnusson	1992	Falth-Magnusson	RCT	AFA alone	AR		5	5to14	High	AFA	66	13	89	14	High	High/Unclear	Unclear	High/Unclear
Hattevig	1989	Kjellman Maternal Dietary Exclusion Trial	CCT	AFA alone	AD		1.5	0to4	High	AFA	65	17	50	20	High	High/Unclear	Low	Low
Hattevig	1989	Kjellman Maternal Dietary Exclusion Trial	CCT	AFA alone	FA-ANY		1.5	0to4	High	AFA	65	8	50	9	High	High/Unclear	Low	Low
Hattevig	1989	Kjellman Maternal Dietary Exclusion Trial	CCT	AFA alone	FA-CM		1.5	0to4	High	AFA	65	7	50	7	High	High/Unclear	Low	Low
Hattevig	1989	Kjellman Maternal Dietary Exclusion Trial	CCT	AFA alone	FA-EGG		1.5	0to4	High	AFA	65	5	50	3	High	High/Unclear	Low	Low
Hattevig	1999	Kjellman Maternal Dietary Exclusion Trial	CCT	AFA alone	AD		10	5to14	High	AFA	65	28	50	30	High	High/Unclear	Low	Low
Hattevig	1999	Kjellman Maternal Dietary Exclusion Trial	CCT	AFA alone	ASaero	SPT-AEROALLERGEN	10	any	High	AFA	65	21	50	23	High	High/Unclear	Low	Low
Hattevig	1999	Kjellman Maternal Dietary Exclusion Trial	CCT	AFA alone	ASfd	SPT-FOOD	10	any	High	AFA	65	9	50	12	High	High/Unclear	Low	Low
Hattevig	1999	Kjellman Maternal Dietary Exclusion Trial	CCT	AFA alone	RecWheeze		10	5to14	High	AFA	65	14	50	14	High	High/Unclear	Low	Low
Hattevig	1999	Kjellman Maternal Dietary Exclusion Trial	CCT	AFA alone	FA-ANY		10	5to14	High	AFA	65	7	50	8	High	High/Unclear	Low	Low
Hattevig	1999	Kjellman Maternal Dietary Exclusion Trial	CCT	AFA alone	FA-CM		10	5to14	High	AFA	65	1	50	1	High	High/Unclear	Low	Low
Hattevig	1999	Kjellman Maternal Dietary Exclusion Trial	CCT	AFA alone	FA-EGG		10	5to14	High	AFA	65	3	50	5	High	High/Unclear	Low	Low
Hattevig	1999	Kjellman Maternal Dietary Exclusion Trial	CCT	AFA alone	AR		10	5to14	High	AFA	65	22	50	19	High	High/Unclear	Low	Low
Herrmann	1996	Herrmann	CCT	AFA alone	AD		1	0to4	High	AFA	30	6	41	5	High	High/Unclear	Low	Low
Herrmann	1996	Herrmann	CCT	AFA alone	AScm	sIgE-CM	1	any	High	AFA	24	1	30	1	High	High/Unclear	Low	Low
Herrmann	1996	Herrmann	CCT	AFA alone	ASegg	sIgE-EGG	1	any	High	AFA	24	3	30	3	High	High/Unclear	Low	Low
Hide	1996	Isle of Wight Prevention Study	RCT	Multifaceted	AScm		4	any	High	MULTI	58	0	62	3	Unclear	High/Unclear	Low	Low	post
Hide	1996	Isle of Wight Prevention Study	RCT	Multifaceted	ASegg		4	any	High	MULTI	58	2	62	4	Unclear	High/Unclear	Low	Low	post
Hide	1996	Isle of Wight Prevention Study	RCT	Multifaceted	AR		4	0to4	High	MULTI	58	6	62	11	Unclear	High/Unclear	Low	Low	post
Jirapinyo	2013	Jirapinyo	RCT	AFA alone	AD		<0.5	0to4	High	AFA	30	2	32	8	Unclear	High/Unclear	Low	Low
Lilja	1989	Lilja	RCT	AFA alone	AD		1.5	0to4	High	AFA	81	27	82	23	Unclear	High/Unclear	Low	Low
Lilja	1989	Lilja	RCT	AFA alone	AR		1.5	0to4	High	AFA	81	1	82	1	Unclear	High/Unclear	Low	Low
Lilja	1989	Lilja	RCT	AFA alone	FA-CM		1.5	0to4	High	AFA	81	4	82	6	Unclear	High/Unclear	Low	Low
Lilja	1989	Lilja	RCT	AFA alone	FA-EGG		1.5	0to4	High	AFA	81	2	82	1	Unclear	High/Unclear	Low	Low
Lilja	1989	Lilja	RCT	AFA alone	RecWheeze		1.5	0to4	High	AFA	81	4	82	7	Unclear	High/Unclear	Low	Low
Lovegrove	1994	Lovegrove	RCT	Multifaceted	AD		1	0to4	High	MULTI	12	5	14	8	Unclear	High/Unclear	High	High/Unclear	pre/post
Scott	2012	Isle of Wight prevention cohort	RCT	Multifaceted	AD		18	15plus	High	MULTI	56	7	58	15	Unclear	High/Unclear	Low	Low	post
Scott	2012	Isle of Wight prevention cohort	RCT	Multifaceted	RecWheeze		18	15plus	High	MULTI	56	13	58	20	Unclear	High/Unclear	Low	Low	post
Scott	2012	Isle of Wight prevention cohort	RCT	Multifaceted	RecWheeze.atop		18	15plus	High	MULTI	48	4	55	13	Unclear	High/Unclear	Low	Low	post
Shao	2006	Shao*	RCT	Multifaceted	ASfd		1.5	any	High	MULTI	23	3	23	9	Unclear	High/Unclear	Unclear	High/Unclear	post
Shao	2006	Shao	RCT	Multifaceted	AD		1.5	0to4	High	MULTI	23	4	23	9	Unclear	High/Unclear	Unclear	High/Unclear	post
Sigurs	1992	Kjellman Maternal Dietary Exclusion Trial	CCT	AFA alone	ASany	SPT-ANY	4	any	High	AFA	65	8	50	11	High	High/Unclear	Low	Low
Sigurs	1992	Kjellman Maternal Dietary Exclusion Trial	CCT	AFA alone	AScm	SPT-CM	4	any	High	AFA	65	2	50	2	High	High/Unclear	Low	Low
Sigurs	1992	Kjellman Maternal Dietary Exclusion Trial	CCT	AFA alone	ASegg	SPT-EGG	4	any	High	AFA	65	2	50	4	High	High/Unclear	Low	Low
Sigurs	1992	Kjellman Maternal Dietary Exclusion Trial	CCT	AFA alone	ASpn	SPT-PEANUT	4	any	High	AFA	65	0	50	3	High	High/Unclear	Low	Low
Sigurs	1992	Kjellman Maternal Dietary Exclusion Trial	CCT	AFA alone	RecWheeze		4	0to4	High	AFA	65	7	50	6	High	High/Unclear	Low	Low
Sigurs	1992	Kjellman Maternal Dietary Exclusion Trial	CCT	AFA alone	Wheeze		4	0to4	High	AFA	65	8	50	6	High	High/Unclear	Low	Low
Sigurs	1992	Kjellman Maternal Dietary Exclusion Trial	CCT	AFA alone	AR		4	0to4	High	AFA	65	8	50	5	High	High/Unclear	Low	Low
Wong	2013	CAPPS	RCT	Multifaceted	AScm		15	any	High	MULTI	176	3	149	2	High	High/Unclear	Low	Low	post
Wong	2013	CAPPS	RCT	Multifaceted	ASegg		15	any	High	MULTI	176	4	149	2	High	High/Unclear	Low	Low	post
Wong	2013	CAPPS	RCT	Multifaceted	ASpn		15	any	High	MULTI	176	19	149	16	High	High/Unclear	Low	Low	post
Zeiger	1994	Zeiger 1994	RCT	Multifaceted	AD		7	5to14	High	MULTI	59	9	106	24	High	High/Unclear	Unclear	High/Unclear	post
Zeiger	1994	Zeiger 1994	RCT	Multifaceted	ASaero		7	any	High	MULTI	59	23	106	56	High	High/Unclear	Unclear	High/Unclear	post
Zeiger	1994	Zeiger 1994	RCT	Multifaceted	RecWheeze		7	5to14	High	MULTI	59	21	106	46	High	High/Unclear	Unclear	High/Unclear	post
Zeiger	1994	Zeiger 1994	RCT	Multifaceted	FA-ANY		7	5to14	High	MULTI	59	6	106	24	High	High/Unclear	Unclear	High/Unclear	post
Zeiger	1994	Zeiger 1994	RCT	Multifaceted	AR		7	5to14	High	MULTI	59	21	106	47	High	High/Unclear	Unclear	High/Unclear	post

## Sheet: REVIEW C-OBSERVAT
FIRST AUTHOR	YEAR OF PUBLICATION	STUDY NAME	Design	DESIGN GROUP	EXPOSURE	SPECIFIC FOOD	FOOD SUBGROUP	SPECIFIC EXPOSURE GROUP	MOTHER-CHILD EXPOSURE	if exposure is categorical reference group	if exposure is categorical comparison groups	EXPOSURE SIZE GROUP	EXPOSURE CATEGORIES	to reverse REFERENCE GROUP	OUTCOME GROUP	SPECIFIC OUTCOME	OUTCOME SUBGROUP	AGE AT OUTCOME	AGE AT OUTCOME GROUP	DISEASE RISK	OVERALL RISK OF BIAS	OVERALL RISK OF BIAS	Risk of Bias due to potential conflict of interest [No evidence of industry involvement = Low Risk of Bias]. Look at the the funding/acknowledgements/conflict of interest sections of the paper, if available	CoI	n cases	No. EXPOSED in CASES (if exposure is categorical)	No. NON-Exposed in CASES (if exposure is categorical)	No. EXPOSED in CONTROLS (if exposure is categorical)	No. NON-Exposed in CONTROLS (if exposure is categorical)	Total no. participants with outcome and exposure data in Exposed group (denominator)	No. participants with the outcome in Exposed	Total no. participants with outcome and exposure data in Non-exposed group (denominator)	No.participants with outcome in Non-Exposed	Effect measure association (OR, HR, Mean Difference (B))	Effect size	95% CI [lower]	95% CI [upper]	p-value	Other	Effect measure association (OR, HR, Mean Difference (B))	adj. Effect size	adj.95% CI [lower]	adj.95% CI [upper]	adj.p-value	FINAL_Effect measure association (OR, HR, Mean Difference (B))	unadj.lnOR (RAW NUMBERS OR unadj.OR/RR/HR)	unadj.SE(lnOR) (RAW NUMBERS OR unadj.OR/RR/HR)	adj.lnOR	adj.SE(lnOR)
AUTHOR	YEAR	STUDY	Design	design	EXPOSURE	SPECIFIC EXPOSURE	exp.subg	exp	mother-pregnancy, lactation; infant, suppl, intro, intake	if exposure is categorical reference group	if exposure is categorical comparison groups	exp.code	exp.cutoff	TO REVERSE ESTIMATES (REF=LOWER/NO VS HIGHER/YES)	out.type	spec.out	out.subg	age cleaned	age.out	disease.risk	OVERALL RISK OF BIAS Low Risk of Bias overall, if there is a Low Risk of Bias on all of the key domains: 1. Assessment bias 2. Selection Bias 3. Confounding	overall.risk	Risk of Bias due to potential conflict of interest [No evidence of industry involvement = Low Risk of Bias]. Look at the the funding/acknowledgements/conflict of interest sections of the paper, if available	CoI	n cases	No. EXPOSED in CASES (if exposure is categorical)	No. NON-Exposed in CASES (if exposure is categorical)	No. EXPOSED in CONTROLS (if exposure is categorical)	No. NON-Exposed in CONTROLS (if exposure is categorical)	Total no. participants with outcome and exposure data in Exposed group (denominator)	No. participants with the outcome in Exposed	Total no. participants with outcome and exposure data in Non-exposed group (denominator)	No.participants with outcome in Non-Exposed	Effect measure association (OR, HR, Mean Difference (B))	Effect size	95% CI [lower]	95% CI [upper]	p-value	Other	Effect measure association (OR, HR, Mean Difference (B))	adj. Effect size	adj.95% CI [lower]	adj.95% CI [upper]	adj.p-value	FINAL_Effect measure association (OR, HR, Mean Difference (B))	combined.unadj.lnOR	combined.unadj.SE(lnOR)	adj.lnOR	adj.SE(lnOR)
Roduit	2012	PASTURE	prospective cohort	prospective	chocolate	chocolate	CHOCOLATE	INFANT CONFECTIONERY INTRODUCTION	infant-1st year-intro	>12	3 to 12	8plus	categ(months)	1=yes	atopic	AD		4	0to4	low-normal	Low	Low	High	Unclear-High																OR	0.53	0.36	0.77		OR			-0.634878	0.190568
Roduit	2012	PASTURE	prospective cohort	prospective	age at introduction -butter	butter	ANIMAL- DAIRY- SATURATED	INFANT FAT SOURCE INTRODUCTION	infant-1st year-intro	>12	3 to 12	8plus	categ(months)	1=yes	atopic	AD		4	0to4	low-normal	Low	Low	High	Unclear-High																OR	0.89	0.6	1.3		OR			-0.116534	0.193315
Roduit	2012	PASTURE	prospective cohort	prospective	age at introduction -Vegetables or fruits	fruits and vegetables	ANY	INFANT FRUIT AND VEG INTRODUCTION	infant-1st year-intro	>6	<6	5to7	categ(months)	1=yes	atopic	AD		4	0to4	low-normal	Low	Low	High	Unclear-High																OR	0.46	0.31	0.7		OR			-0.776529	0.214211
Roduit	2012	PASTURE	prospective cohort	prospective	age at introduction - meat	meat		INFANT MEAT INTRODUCTION	infant-1st year-intro	>8	3TO8	8plus	categ(months)	1=yes	atopic	AD		4	0to4	low-normal	Low	Low	High	Unclear-High																OR	0.75	0.49	1.14		OR			-0.287682	0.213628
Andreasyan	2007	Tasmanian Infant Health Survey- >CARHS	prospectvie cohort	prospective	SPECIFIC FOOD INTAKE - CHILD	honey	HONEY	INFANT CONFECTIONERY INTRODUCTION	infant-1st year-intro	>1	<=1	0to4	categ(months)	1=yes	atopic	AD		9	5to14	low-normal	Unclear	Unclear-high	Low	Low										RR	0.4	0.11	1.5			RR	0.44	0.12	1.65		RR	-0.916291	0.674365	-0.820981	0.674365
Roduit	2012	PASTURE	prospective cohort	prospective	Specific food exposure - infant	Farm milk' - either boiled or not boiled		INFANT FARM MILK INTAKE	infant-1st year-intake	No farm milk in first year	Farm milk in infant diet	oftenVSnever-rare	yes-no	2=no	atopic	AD		4	0to4	low-normal	Unclear	Unclear-high	Low	Low																OR	0.88	0.49	1.57		OR			-0.127833	0.295362
Alm	2009	Infants of Western Sweden	prospective cohort	prospective	type of fat on bread	type of fat on bread	ANIMAL- DAIRY- SATURATED	INFANT FAT SOURCE INTRODUCTION	infant-1st year-intake	Dairy (<12)	Nil(>12)	8plus	yes-no	1=yes	atopic	AD		1	0to4	low-normal	High	Unclear-high	Low	Low										OR	1.06	0.77	1.47							NS	OR	0.0582689	0.166833
Alm	2009	Infants of Western Sweden	prospective cohort	prospective	lactic acid (yoghurt, fermented vegetables, etc)	lactic acid (yoghurt, fermented vegetables, etc)		INFANT FERMENTED FOOD INTAKE	infant-1st year-intake	>3	0	oftenVSnever-rare	freq(times/week)	2=no	atopic	AD		1	0to4	low-normal	High	Unclear-high	Low	Low										OR	2.87	2.24	3.69							NS	OR	1.05431	0.128222
Kull	2006	BAMSE	prospective cohort	prospective	FISH	fish	any fish	INFANT FISH- FISH OIL INTAKE	infant-1st year-intake	<=1 time/mo	> =2-3 time/mo	oftenVSnever-rare	freq(times/week)	2=no	atopic	AD		4	0to4	low-normal	Low	Low	Low	Low						2896	551	716	190							OR	0.69	0.57	0.84		OR	-0.430029	0.0969826	-0.371064	0.100362
Magnussonm	2013	BAMSE	prospective cohort	prospective	FISH	fish	any fish	INFANT FISH- FISH OIL INTAKE	infant-1st year-intake	<=1 time/mo	> =2-3 time/mo	oftenVSnever-rare	freq(times/week)	2=no	atopic	AD		12	5to14	low-normal	Low	Low	Low	Low																OR	0.87	0.7	1.08		OR			-0.139262	0.110318
Alm	2009	Infants of Western Sweden	prospective cohort	prospective	FISH	fish	any fish	INFANT FISH- FISH OIL INTAKE	infant-1st year-intake	>3	0	oftenVSnever-rare	freq(times/week)	2=no	atopic	AD		1	0to4	low-normal	High	Unclear-high	Low	Low										OR	2.73	1.8	4.13							NS	OR	1.0043	0.211212
Oien	2009	PACT	prospective cohort	prospective	Fatty acid	fish	any fish	INFANT FISH- FISH OIL INTAKE	infant-1st year-intake	Never	?1x/week	oftenVSnever-rare	freq(times/week)	2=no	atopic	AD		2	0to4	low-normal	Low	Low	Low	Low										OR	0.65	0.45	0.94			OR	0.62	0.42	0.91		OR	-0.430783	0.188218	-0.478036	0.195778
Zutavern	2006	LISA	prospective cohort	prospective	fruit	fruits	FRUIT	INFANT FRUIT INTRODUCTION	infant-1st year-intro	0-4	>6m	0to4	categ(months)	2=no	atopic	AD		2	0to4	low-normal	Low	Low	Low	Low																OR	1.11	0.78	1.57		OR			0.10436	0.176896
Dunlop	2006	Slovak birth cohort	prospective cohort	prospective	CITRUS FRUIT	citrus fruits	FRUIT	INFANT FRUIT INTRODUCTION	infant-1st year-intro	>12	<12	8plus	categ(months)	1=yes	atopic	AD		1	0to4	low-normal	High	Unclear-high	Low	Low										OR	1.11	0.7	1.8								OR	0.10436	0.246646
Andreasyan	2007	Tasmanian Infant Health Survey- >CARHS	prospectvie cohort	prospective	SPECIFIC FOOD INTAKE - CHILD	fruit syrup	FRUIT JUICE-SYRUP	INFANT FRUIT INTRODUCTION	infant-1st year-intro	>1	<=1	0to4	categ(months)	1=yes	atopic	AD		9	5to14	low-normal	Unclear	Unclear-high	Low	Low										RR	1	0.64	1.56			RR	1.22	0.77	1.92		RR	0	0.226881	0.198851	0.231364
Zutavern	2006	LISA	prospective cohort	prospective	VEGETABLES	vegetables	VEGETABLES	INFANT VEGETABLE INTRODUCTION	infant-1st year-intro	0-4	>6m	0to4	categ(months)	2=no	atopic	AD		2	0to4	low-normal	Low	Low	Low	Low																OR	1.49	1.06	2.1		OR			0.398776	0.175082
Zutavern	2004	ZUTAVERN, A	prospective cohort	prospective	vegetables	vegetables	VEGETABLES	INFANT VEGETABLE INTRODUCTION	infant-1st year-intro	<=4	>4	0to4	categ(months)	2=no	atopic	AD		5.5	5to14	low-normal	Low	Low	Low	Low						174	58.638	449	162.538					0.57	in the paper they call it prevalence at age 5.5 but based on the definition it is not for AD and transiet wheeze	OR	0.83	0.55	1.3		OR	-0.109998	0.188057	-0.18633	0.228925
Zutavern	2006	LISA	prospective cohort	prospective	meat	meat		INFANT MEAT INTRODUCTION	infant-1st year-intro	0-4	>6m	0to4	categ(months)	2=no	atopic	AD		2	0to4	low-normal	Low	Low	Low	Low																OR	1.63	1	2.65		OR			0.48858	0.247949
Zutavern	2004	ZUTAVERN, A	prospective cohort	prospective	meat	meat		INFANT MEAT INTRODUCTION	infant-1st year-intro	<=5	>5	5to7	categ(months)	2=no	atopic	AD		5.5	5to14	low-normal	High	Unclear-high	Low	Low						256	93.952	365	127.02					0.64	in the paper they call it prevalence at age 5.5 but based on the definition it is not for AD and transiet wheeze						OR	0.0827335	0.169969
Andreasyan	2007	Tasmanian Infant Health Survey- >CARHS	prospectvie cohort	prospective	SPECIFIC FOOD INTAKE - CHILD	Non-milk fluids	ANY NON-MILK FLUID	INFANT NON-MILK FLUID INTRODUCTION	infant-1st year-intro	>1	<=1	0to4	categ(months)	2=no	atopic	AD		9	5to14	low-normal	Unclear	Unclear-high	Low	Low										RR	0.88	0.32	2.42			RR	1.01	0.35	2.87		RR	-0.127833	0.516123	0.00995033	0.532838
Oien	2009	PACT	prospective cohort	prospective	Fatty acid	vegetables	VEGETABLES	INFANT VEGETABLE INTAKE	infant-1st year-intake	?1x/week	Almost daily	oftenVSnever-rare	freq(times/week)	2=no	atopic	AD		2	0to4	low-normal	Low	Low	Low	Low										OR	0.92	0.48	1.77								OR	-0.0833816	0.333858
Bisgaard	2009	COPSAC	prospective cohort	prospective	ALCOHOL	alcohol		MATERNAL ALCOHOL INTAKE	mother-pregnancy-intake	NO	YES	oftenVSnever-rare	yes-no	2=no	atopic	AD		3	0to4	high	Low	Low	Low	Low										OR	1.74	1	3.05	0.05		OR	1.88	0.94	3.75	0.07	OR	0.553885	0.286355	0.631272	0.352288
Linneberg	2004	DANISH BIRTH COHORT	prospective cohort	prospective	MATERNAL INTAKE of alcohol late pregnancy	alcohol		MATERNAL ALCOHOL INTAKE	mother-pregnancy-intake	0	?4	HighestVSLowest	tertile-quartile-quintile	2=no	atopic	AD		1.5	0to4	low-normal	High	Unclear-high	Low	Low										HR	1.01	0.8	1.29			HR	1.05	0.82	1.33		HR	0.00995033	0.124843	0.0487902	0.120607
Miyake	2010	OMCHS	prospective cohort	prospective	any dairy product	dairy	ALL DAIRY	MATERNAL DAIRY INTAKE	mother-pregnancy-intake	Q1 lowest intake	Q4 highest intake	HighestVSLowest	tertile-quartile-quintile	2=no	atopic	AD		2	0to4	low-normal	Low	Low	Low	Low										OR	0.88	0.54	1.43			OR	1.01	0.59	1.73		OR	-0.127833	0.247708	0.00995033	0.274577
Sausenthaler	2007	LISA	prospective cohort	prospective	Specific food intake - maternal	milk	MILK	MATERNAL DAIRY INTAKE	mother-pregnancy-intake	Low	High maternal intake during pregnancy	HighestVSLowest	tertile-quartile-quintile	2=no	atopic	AD		2	0to4	low-normal	Low	Low	Low	Low						1710	304	803	142							OR	1.04	0.8	1.34		OR	0.00645041	0.112053	0.0392207	0.129311
Sausenthaler	2007	LISA	prospective cohort	prospective	Specific food intake - maternal	egg	EGG	MATERNAL EGG INTAKE	mother-pregnancy-intake	Low	High maternal intake during pregnancy	HighestVSLowest	tertile-quartile-quintile	2=no	atopic	AD		2	0to4	low-normal	Low	Low	Low	Low						1838	318	670	127							OR	0.81	0.62	1.06		OR	-0.111492	0.116268	-0.210721	0.13724
Miyake	2010	OMCHS	prospective cohort	prospective	Eggs	egg	EGG	MATERNAL EGG INTAKE	mother-pregnancy-intake	Q1 - lowest	Q4 - highest	HighestVSLowest	tertile-quartile-quintile	2=no	atopic	AD		0.33	0to4	low-normal	Low	Low	Low	Low										OR	0.81	0.38	1.68			OR	0.73	0.33	1.61		OR	-0.210721	0.372201	-0.314711	0.403543
Nwaru	2012	DIPP	prospective cohort	prospective	Specific food intake - maternal [pregnancy]	fat - saturated	ANIMAL- DAIRY- SATURATED	MATERNAL FAT INTAKE	mother-pregnancy-intake	Second/third quartile of intake	Highest quartile	HighestVSLowest	tertile-quartile-quintile	2=no	atopic	AD		5	5to14	low-normal	Low	Low	Low	Low										OR	1.04	0.85	1.27			OR	1.03	0.84	1.27		OR	0.0392207	0.101937	0.0295588	0.106866
Sausenthaler	2007	LISA	prospective cohort	prospective	Fatty acid	butter	ANIMAL- DAIRY- SATURATED	MATERNAL FAT INTAKE	mother-pregnancy-intake	Low	High maternal intake of butter during pregnancy	HighestVSLowest	tertile-quartile-quintile	2=no	atopic	AD		2	0to4	low-normal	Low	Low	Low	Low						1616	274	857	162							OR	1.08	0.79	1.46		OR	-0.132473	0.109574	0.076961	0.153814
Miyake	2009	OMCHS	prospective cohort	prospective	Saturated fatty acids pregnancy	fat saturated	ANIMAL- DAIRY- SATURATED	MATERNAL FAT INTAKE	mother-pregnancy-intake	Q1 lowest intake	Q4 highest intake	HighestVSLowest	tertile-quartile-quintile	2=no	atopic	AD		2	0to4	low-normal	Low	Low	Low	Low										OR	1.3	0.78	2.18			OR	1.6	0.92	2.83		OR	0.262364	0.263755	0.470004	0.290956
Oien	2009	PACT	prospective cohort	prospective	Fatty acid	cod liver oil	COD LIVER OIL	MATERNAL FISH OIL SUPPLEMENT	mother-pregnancy-suppl	Never	?4	oftenVSnever-rare	freq(times/week)	2=no	atopic	AD		2	0to4	low-normal	Low	Low	Low	Low										OR	0.96	0.77	1.2	0.71							OR	-0.040822	0.113849
Wang	2007	Tiawan Nationation Birth Cohort Study	prospective cohort	prospective	Fatty acid	fat - oils from deep sea fish	OTHER FISH OILS	MATERNAL FISH OIL SUPPLEMENT	mother-pregnancy-suppl	Maternal fish oil supplementation during pregnancy	No maternal fish oil supplementation during pregnancy	oftenVSnever-rare	yes-no	1=yes	atopic	AD		0.5	0to4	low-normal	Low	Low	Low	Low						152	9	1608	109	OR	1.15	0.91	2.83								OR	0.139762	0.459446
Willers	2007	ABERDEEN COHORT	prospectvie cohort	prospective	SPECIFIC FOOD INTAKE - MATERNAL	fish	FISH	MATERNAL FISH- OMEGA-3- PUFA- SEAFOOD INTAKE	mother-pregnancy-intake	never	?1/week	oftenVSnever-rare	freq(times/week)	2=no	atopic	AD		5	5to14	low-normal	Low	Low	Low	Low										OR	0.73	0.47	1.16	0.111		OR	0.68	0.43	1.1	0.05	OR	-0.314711	0.236291	-0.385662	0.245394
Leermakers	2013	GENERATION R	prospectvie cohort	prospective	Fish intake in pregnancy	fish	FISH	MATERNAL FISH- OMEGA-3- PUFA- SEAFOOD INTAKE	mother-pregnancy-intake	No fish intake in first trimester of pregnancy	Total fish >210g/week	oftenVSnever-rare	tertile-quartile-quintile	2=no	atopic	AD		4	0to4	low-normal	Low	Low	Low	Low																OR	0.96	0.73	1.28		OR			-0.040822	0.146777
Jedrychowski	2011	JEDRYCHOWSKI, W	prospective cohort	prospective	FISH INTAKE-PREGNANCY	fish	FISH	MATERNAL FISH- OMEGA-3- PUFA- SEAFOOD INTAKE	mother-pregnancy-intake	<=90	>205	HighestVSLowest	tertile-quartile-quintile	2=no	atopic	AD		1	0to4	low-normal	Low	Low	Low	Low																OR	0.57	0.35	0.93		OR			-0.562119	0.24977
Sausenthaler	2007	LISA	prospective cohort	prospective	Fatty acid	fish	FISH	MATERNAL FISH- OMEGA-3- PUFA- SEAFOOD INTAKE	mother-pregnancy-intake	Low	High maternal intake of fish during pregnancy	HighestVSLowest	tertile-quartile-quintile	2=no	atopic	AD		2	0to4	low-normal	Low	Low	Low	Low						771	122	1727	322							OR	0.75	0.57	0.98	<0,05	OR	-0.198171	0.116425	-0.287682	0.136469
Miyake	2009	OMCHS	prospective cohort	prospective	Fish	fish	FISH	MATERNAL FISH- OMEGA-3- PUFA- SEAFOOD INTAKE	mother-pregnancy-intake	Q1 lowest intake	Q4 highest intake	HighestVSLowest	tertile-quartile-quintile	2=no	atopic	AD		2	0to4	low-normal	Low	Low	Low	Low										OR	0.67	0.39	1.13			OR	0.73	0.3	1.75		OR	-0.400478	0.266681	-0.314711	0.446085
Oien	2009	PACT	prospective cohort	prospective	Fatty acid	fish	FISH	MATERNAL FISH- OMEGA-3- PUFA- SEAFOOD INTAKE	mother-pregnancy-intake	<1x/week	?1x/week	oftenVSnever-rare	freq(times/week)	2=no	atopic	AD		2	0to4	low-normal	Low	Low	Low	Low										OR	1.02	0.82	1.26	0.88							OR	0.0198026	0.107811
Nwaru	2012	DIPP	prospective cohort	prospective	Specific food intake - maternal [pregnancy]	fat - PUFA	OMEGA 3- PUFA	MATERNAL FISH- OMEGA-3- PUFA- SEAFOOD INTAKE	mother-pregnancy-intake	Second/third quartile of intake	Highest quartile	HighestVSLowest	tertile-quartile-quintile	2=no	atopic	AD		5	5to14	low-normal	Low	Low	Low	Low										OR	1	0.82	1.22			OR	1.03	0.83	1.27		OR	0	0.101455	0.0295588	0.106866
Wang	2007	Tiawan Nationation Birth Cohort Study	prospective cohort	prospective	Specific food intake - maternal	shrimp and crab	SEAFOOD	MATERNAL FISH- OMEGA-3- PUFA- SEAFOOD INTAKE	mother-pregnancy-intake	up to 3 times per week	>3times per week	oftenVSnever-rare	freq(times/week)	2=no	atopic	AD		0.5	0to4	low-normal	Low	Low	Low	Low						152		1608		OR	1.21	0.78	1.59								OR	0.19062	0.139344
Martindale	2005	ABERDEEN COHORT	prospective cohort	prospective	FRUITS	fruits	ANY FRUIT	MATERNAL FRUIT INTAKE	mother-pregnancy-intake	<=1	>1	HighestVSLowest	tertile-quartile-quintile	2=no	atopic	AD		2	0to4	low-normal	Low	Low	Low	Low										OR	1.72	1.22	2.43			OR	1.66	1.16	2.4		OR	0.542324	0.17631	0.506818	0.188087
Miyake	2010	OMCHS	prospective cohort	prospective	Maternal intake of total fruit	fruits	ANY FRUIT	MATERNAL FRUIT INTAKE	mother-pregnancy-intake	Q1 lowest intake	Q4 highest intake	HighestVSLowest	tertile-quartile-quintile	2=no	atopic	AD		2	0to4	low-normal	Low	Low	Low	Low										OR	0.66	0.39	1.1			OR	0.78	0.45	1.35		OR	-0.415515	0.260625	-0.248461	0.279881
Sausenthaler	2007	LISA	prospective cohort	prospective	Specific food intake - maternal	apples	APPLE	MATERNAL FRUIT INTAKE	mother-pregnancy-intake	Low	High maternal intake during pregnancy	HighestVSLowest	tertile-quartile-quintile	2=no	atopic	AD		2	0to4	low-normal	Low	Low	Low	Low						857	150	1651	296							OR	0.92	0.72	1.21		OR	-0.0291981	0.110442	-0.0833816	0.139797
Miyake	2009	OMCHS	prospective cohort	prospective	meat	meat		MATERNAL MEAT INTAKE	mother-pregnancy-intake	Q1 lowest intake	Q4 highest intake	HighestVSLowest	tertile-quartile-quintile	2=no	atopic	AD		2	0to4	low-normal	Low	Low	Low	Low										OR	1.12	0.69	1.83			OR	1.31	0.78	2.22		OR	0.113329	0.250504	0.270027	0.269122
Sausenthaler	2007	LISA	prospective cohort	prospective	Specific food intake - maternal	yoghurt	PROBIOTIC	MATERNAL PROBIOTIC	mother-pregnancy-intake	Low	High maternal intake during pregnancy	HighestVSLowest	tertile-quartile-quintile	2=no	atopic	AD		2	0to4	low-normal	Low	Low	Low	Low						1370	249	1146	197							OR	0.99	0.78	1.27		OR	0.0676815	0.105062	-0.0100503	0.127075
Miyake	2010	OMCHS	prospective cohort	prospective	yoghurt	yoghurt	PROBIOTIC	MATERNAL PROBIOTIC	mother-pregnancy-intake	Q1 lowest intake	Q4 highest intake	HighestVSLowest	tertile-quartile-quintile	2=no	atopic	AD		2	0to4	low-normal	Low	Low	Low	Low										OR	0.82	0.49	1.35			OR	0.79	0.46	1.37		OR	-0.198451	0.254365	-0.235722	0.280884
Wang	2007	Tiawan Nationation Birth Cohort Study	prospective cohort	prospective	Specific food intake - maternal	GINSENG	GINSENG	MATERNAL TEA INTAKE	mother-pregnancy-intake	Maternal intake during pregnancy	No maternal intake during pregnancy	oftenVSnever-rare	yes-no	1=yes	atopic	AD		0.5	0to4	low-normal	Low	Low	Low	Low						152		1608		OR	1.69	0.23	12.61								OR	0.524729	1.02539
Miyake	2010	OMCHS	prospective cohort	prospective	Maternal intake of vegetables	vegetables	ANY VEGETABLE	MATERNAL VEGETABLE INTAKE	mother-pregnancy-intake	Q1 lowest intake	Q4 highest intake	HighestVSLowest	tertile-quartile-quintile	2=no	atopic	AD		2	0to4	low-normal	Low	Low	Low	Low										OR	0.75	0.46	1.22			OR	0.7	0.41	1.19		OR	-0.287682	0.248231	-0.356675	0.270729
Oien	2009	PACT	prospective cohort	prospective	Fatty acid	vegetables	ANY VEGETABLE	MATERNAL VEGETABLE INTAKE	mother-pregnancy-intake	?1x/week	Almost daily	oftenVSnever-rare	freq(times/week)	2=no	atopic	AD		2	0to4	low-normal	Low	Low	Low	Low										OR	0.72	0.51	1.02								OR	-0.328504	0.177707
Sausenthaler	2007	LISA	prospective cohort	prospective	Specific food intake - maternal	cabbage	GREEN- LEAFY VEGETABLES	MATERNAL VEGETABLE INTAKE	mother-pregnancy-intake	Low	High maternal intake during pregnancy	HighestVSLowest	tertile-quartile-quintile	2=no	atopic	AD		2	0to4	low-normal	Low	Low	Low	Low						955	178	1548	268							OR	1.24	0.96	1.59		OR	0.0899716	0.106853	0.215111	0.126848
Marini	1996	Marini	prospective cohort (of RCT-CCT)	prospective	CITRUS FRUIT	citrus fruits	FRUIT	INFANT FRUIT INTRODUCTION	infant-1st year-intro	>=4	<4	0to4	categ(months)	1=yes	atopic	AD		1	0to4	high	Unclear	Unclear-high	Unclear	Unclear-High																OR	0.9	0.2	5.1		OR			-0.105361	0.885001
Sariachvili	2010	PIPO COHORT	NESTED CASE CONTROL	prospective	SPECIFIC FOOD INTAKE [INFANT]	fruits	FRUIT	INFANT FRUIT INTRODUCTION	infant-1st year-intro	>4	<=4	0to4	categ(months)	1=yes	atopic	AD		4	0to4	low-normal	Low	Low	Unclear	Unclear-High	252	57	195	86	219					OR	0.74	0.51	1.1	0.13							OR	-0.301105	0.202253
Sariachvili	2010	PIPO COHORT	NESTED CASE CONTROL	prospective	SPECIFIC FOOD INTAKE [INFANT]	vegetables	VEGETABLES	INFANT VEGETABLE INTRODUCTION	infant-1st year-intro	>4	<=4	0to4	categ(months)	1=yes	atopic	AD		4	0to4	low-normal	Low	Low	Unclear	Unclear-High	252	49	203	77	228					OR	0.72	0.48	1.07	0.1							OR	-0.328504	0.202124
Marini	1996	Marini	prospective cohort (of RCT-CCT)	prospective	BEEF	meat		INFANT MEAT INTRODUCTION	infant-1st year-intro	>=6	<6	5to7	categ(months)	1=yes	atopic	AD		1	0to4	high	Unclear	Unclear-high	Unclear	Unclear-High																OR	5.6	1.1	27.5		OR			1.72277	0.811949
Sariachvili	2010	PIPO COHORT	NESTED CASE CONTROL	prospective	SPECIFIC FOOD INTAKE [INFANT]	meat		INFANT MEAT INTRODUCTION	infant-1st year-intro	>4	<=4	0to4	categ(months)	1=yes	atopic	AD		4	0to4	low-normal	Low	Low	Unclear	Unclear-High	252	6	246	90	215					OR	1.84	0.51	6.58	0.34							OR	0.609766	0.650137
Bertelsen	2013	Norwegian Mother & Child Cohort Study	prospective cohort	prospective	Probiotic-pregnancy	PROBIOTICS (milk based)	PROBIOTIC	MATERNAL PROBIOTIC	mother-pregnancy-intake	no	yes	oftenVSnever-rare	yes-no	2=no	atopic	AD		0.5	0to4	low-normal	Unclear	Unclear-high	Unclear	Unclear-High																OR	0.94	0.89	0.99		OR			-0.0618754	0.0264414
Nwaru	2010	DIPP	prospective cohort	prospective	age at introduction to FRUITS AND BERRIES	fruits and berries	FRUIT	INFANT FRUIT INTRODUCTION	infant-1st year-intro	< 3.46	>4	0to4	categ(months)	2=no	atopic	aero	sIgEaero	5	any	low-normal	Low	Low	Low	Low										OR	1.3	0.89	1.91			OR	1.54	0.97	2.45		OR	0.262364	0.196295	0.431782	0.236891
Zutavern	2004	ZUTAVERN, A	prospective cohort	prospective	fruits	fruits	FRUIT	INFANT FRUIT INTRODUCTION	infant-1st year-intro	<=4	>4	0to4	categ(months)	2=no	atopic	aero	SPTaero	5.5	any	low-normal	High	Unclear-high	Low	Low						181	31.856	442	72.046					0.71	in the paper they call it prevalence at age 5.5 but based on the definition it is not for AD and transiet wheeze						OR	0.0923873	0.233836
Strassburger	2010	Strassburger, Sao Leopoldo Brazil	prospective cohort	prospective	time of introduction of fruit - FRUIT JUICE	fruit juice	FRUIT JUICE-SYRUP	INFANT FRUIT INTRODUCTION	infant-1st year-intro	>=4	<4	0to4	categ(months)	1=yes	atopic	aero	SPTaero	3.5	any	low-normal	Low	Low	Low	Low						52	21	269	72	OR	1.85	1	3.43	0.048		OR	1.39	0.7	2.74	0.335	OR	0.615186	0.314987	0.329304	0.346252
Nwaru	2010	DIPP	prospective cohort	prospective	age at introduction to POTATOES	potatoes	POTATO-CARROT-ROOT VEGETABLES	INFANT VEGETABLE INTRODUCTION	infant-1st year-intro	<3.1	>4	0to4	categ(months)	2=no	atopic	aero	sIgEaero	5	any	low-normal	Low	Low	Low	Low										OR	1.67	1.13	2.48			OR	1.93	1.2	3.11		OR	0.512824	0.201753	0.65752	0.24342
Zutavern	2004	ZUTAVERN, A	prospective cohort	prospective	vegetables	vegetables	VEGETABLES	INFANT VEGETABLE INTRODUCTION	infant-1st year-intro	<=4	>4	0to4	categ(months)	2=no	atopic	aero	SPTaero	5.5	any	low-normal	Low	Low	Low	Low						174	29.58	449	74.085					0.9	in the paper they call it prevalence at age 5.5 but based on the definition it is not for AD and transiet wheeze	OR	1	0.57	1.7		OR	0.035859	0.238529	0	0.270729
Nwaru	2010	DIPP	prospective cohort	prospective	age at introduction to RED MEET	meat		INFANT MEAT INTRODUCTION	infant-1st year-intro	<5.1	>5.5	5to7	categ(months)	2=no	atopic	aero	sIgEaero	5	any	low-normal	Low	Low	Low	Low										OR	1.38	1	1.91			OR	1.64	1.12	2.41		OR	0.322083	0.165826	0.494696	0.196393
Zutavern	2004	ZUTAVERN, A	prospective cohort	prospective	meat	meat		INFANT MEAT INTRODUCTION	infant-1st year-intro	<=5	>5	5to7	categ(months)	2=no	atopic	aero	SPTaero	5.5	any	low-normal	High	Unclear-high	Low	Low						256	48.896	365	55.48					0.23	in the paper they call it prevalence at age 5.5 but based on the definition it is not for AD and transiet wheeze						OR	0.275475	0.215721
Sausenthaler	2007	LISA	prospective cohort	prospective	Specific food intake - maternal	milk	MILK	MATERNAL DAIRY INTAKE	mother-pregnancy-intake	Low	High maternal intake during pregnancy	HighestVSLowest	tertile-quartile-quintile	2=no	atopic	aero	sIgEaero	2	any	low-normal	Unclear	Unclear-high	Low	Low						1445	67	688	36							OR	0.95	0.58	1.57		OR	-0.12717	0.212044	-0.0512933	0.256311
Sausenthaler	2007	LISA	prospective cohort	prospective	Specific food intake - maternal	egg	EGG	MATERNAL EGG INTAKE	mother-pregnancy-intake	Low	High maternal intake during pregnancy	HighestVSLowest	tertile-quartile-quintile	2=no	atopic	aero	sIgEaero	2	any	low-normal	Unclear	Unclear-high	Low	Low						1567	73	563	30							OR	0.9	0.53	1.53		OR	-0.141429	0.22266	-0.105361	0.270729
Calvani (FH+)	2006	APAL	retrospective cohort	retrospective	Butter intake pregnancy	butter	ANIMAL- DAIRY- SATURATED	MATERNAL FAT INTAKE	mother-pregnancy-intake	1 time/month or less	2-3 times/wk or more	oftenVSnever-rare	freq(times/week)	2=no	atopic	aero	SPTaero	5	any	high	Unclear	Unclear-high	Low	Low										OR	1.4	0.73	2.68			OR	1.59	0.51	4.97		OR	0.336472	0.331298	0.463734	0.581472
Sausenthaler	2007	LISA	prospective cohort	prospective	Fatty acid	butter	ANIMAL- DAIRY- SATURATED	MATERNAL FAT INTAKE	mother-pregnancy-intake	Low	High maternal intake of butter during pregnancy	HighestVSLowest	tertile-quartile-quintile	2=no	atopic	aero	sIgEaero	2	any	low-normal	Unclear	Unclear-high	Low	Low						1350	63	752	40							OR	0.86	0.43	1.53		OR	-0.137736	0.207496	-0.150823	0.293924
Nwaru	2010	DIPP	prospective cohort	prospective	Specific food exposures - Maternal [pregnancy]	fat - n6	OMEGA 6- MUFA	MATERNAL FAT INTAKE	mother-pregnancy-intake	2nd and 3rd quartile of n-6 PUFA intake	4th quartile of n-6 PUFA intake	HighestVSLowest	tertile-quartile-quintile	2=no	atopic	aero	sIgEaero	5	any	low-normal	Low	Low	Low	Low										OR	0.76	0.53	1.1			OR	0.78	0.52	1.17		OR	-0.274437	0.188646	-0.248461	0.20687
Calvani	2006	APAL	retrospective cohort	retrospective	Fish intake	fish	FISH	MATERNAL FISH- OMEGA-3- PUFA- SEAFOOD INTAKE	mother-pregnancy-intake	1 time/month or less	2-3 times/wk or more	oftenVSnever-rare	freq(times/week)	2=no	atopic	aero	SPTaero	5	any	low-normal	Unclear	Unclear-high	Low	Low										OR						OR	0.57	0.32	1.03		OR			-0.562119	0.301876
Sausenthaler	2007	LISA	prospective cohort	prospective	Fatty acid	fish	FISH	MATERNAL FISH- OMEGA-3- PUFA- SEAFOOD INTAKE	mother-pregnancy-intake	Low	High maternal intake of fish during pregnancy	HighestVSLowest	tertile-quartile-quintile	2=no	atopic	aero	sIgEaero	2	any	low-normal	Unclear	Unclear-high	Low	Low						663	32	1457	70							OR	0.94	0.56	1.57		OR	0.00483322	0.218727	-0.0618754	0.26171
Nwaru	2010	DIPP	prospective cohort	prospective	Specific food exposures - Maternal [pregnancy]	fat - n3	OMEGA 3- PUFA	MATERNAL FISH- OMEGA-3- PUFA- SEAFOOD INTAKE	mother-pregnancy-intake	2nd and 3rd quartile of n-3 PUFA intake	1st quartile of n-3 PUFA intake	HighestVSLowest	tertile-quartile-quintile	2=no	atopic	aero	sIgEaero	5	any	low-normal	Low	Low	Low	Low										OR	0.65	0.45	0.95	<0.01		OR	0.67	0.44	1.02		OR	-0.430783	0.193617	-0.400478	0.214429
Nwaru	2010	DIPP	prospective cohort	prospective	Specific food exposures - Maternal [pregnancy]	fruits	ANY FRUIT	MATERNAL FRUIT INTAKE	mother-pregnancy-intake			HighestVSLowest	continuous	2=no	atopic	aero	sIgEaero	5	any	low-normal	Low	Low	Low	Low										OR	1.32	1.08	1.62		Unit referred to in OR is not completely clear from the paper, but that stated in column M is implied in the Results section	OR	1.36	1.09	1.7		OR	0.277632	0.104487	0.307485	0.113849
Sausenthaler	2007	LISA	prospective cohort	prospective	Specific food intake - maternal	apples	APPLE	MATERNAL FRUIT INTAKE	mother-pregnancy-intake	Low	High maternal intake during pregnancy	HighestVSLowest	tertile-quartile-quintile	2=no	atopic	aero	sIgEaero	2	any	low-normal	Unclear	Unclear-high	Low	Low						734	30	1396	72							OR	0.87	0.52	1.47		OR	-0.243834	0.222257	-0.139262	0.267615
Sausenthaler	2007	LISA	prospective cohort	prospective	Specific food intake - maternal	yoghurt	PROBIOTIC	MATERNAL PROBIOTIC	mother-pregnancy-intake	Low	High maternal intake during pregnancy	HighestVSLowest	tertile-quartile-quintile	2=no	atopic	aero	sIgEaero	2	any	low-normal	Unclear	Unclear-high	Low	Low						1153	48	981	55							OR	0.69	0.43	1.12		OR	-0.312859	0.202485	-0.371064	0.247139
Chatzi	2008	Menorca birth cohort	prospective cohort	prospective	Vegetables	vegetables	ANY VEGETABLE	MATERNAL VEGETABLE INTAKE	mother-pregnancy-intake	<=8	>8	oftenVSnever-rare	freq(times/week)	2=no	atopic	aero	SPTaero	6.5	any	low-normal	Low	Low	Low	Low																OR	0.4	0.22	0.72		OR			-0.916291	0.299891
Sausenthaler	2007	LISA	prospective cohort	prospective	Specific food intake - maternal	cabbage	GREEN- LEAFY VEGETABLES	MATERNAL VEGETABLE INTAKE	mother-pregnancy-intake	Low	High maternal intake during pregnancy	HighestVSLowest	tertile-quartile-quintile	2=no	atopic	aero	sIgEaero	2	any	low-normal	Unclear	Unclear-high	Low	Low						831	43	1295	60							OR	1.16	0.71	1.9		OR	0.116184	0.204942	0.14842	0.251752
Andreasyan	2007	Tasmanian Infant Health Survey- >CARHS	prospectvie cohort	prospective	SPECIFIC FOOD INTAKE - CHILD	honey	HONEY	INFANT CONFECTIONERY INTRODUCTION	infant-1st year-intro	>1	<=1	0to4	categ(months)	1=yes	atopic	any	SPTany	9	any	low-normal	Unclear	Unclear-high	Low	Low										RR	1.27	0.84	1.95			RR	1.22	0.8	1.86		RR	0.239017	0.218782	0.198851	0.215166
Kull	2006	BAMSE	prospective cohort	prospective	FISH	fish	any fish	INFANT FISH- FISH OIL INTAKE	infant-1st year-intake	<=1 time/mo	> =2-3 time/mo	oftenVSnever-rare	freq(times/week)	2=no	atopic	any	sIgEany	4	any	low-normal	Low	Low	Low	Low						2044	456	501	156							OR	0.66	0.53	0.82		OR	-0.454049	0.110143	-0.415515	0.110747
Andreasyan	2007	Tasmanian Infant Health Survey- >CARHS	prospectvie cohort	prospective	SPECIFIC FOOD INTAKE - CHILD	fruit syrup	FRUIT JUICE-SYRUP	INFANT FRUIT INTRODUCTION	infant-1st year-intro	>1	<=1	0to4	categ(months)	1=yes	atopic	any	SPTany	9	any	low-normal	Unclear	Unclear-high	Low	Low										RR	1.02	0.76	1.37			RR	0.99	0.73	1.34		RR	0.0198026	0.150514	-0.0100503	0.154449
Andreasyan	2007	Tasmanian Infant Health Survey- >CARHS	prospectvie cohort	prospective	SPECIFIC FOOD INTAKE - CHILD	Non-milk fluids	ANY NON-MILK FLUID	INFANT NON-MILK FLUID INTRODUCTION	infant-1st year-intro	>1	<=1	0to4	categ(months)	2=no	atopic	any	SPTany	9	any	low-normal	Unclear	Unclear-high	Low	Low										RR	1.39	0.87	2.22			RR	1.43	0.9	2.28		RR	0.329304	0.238879	0.357674	0.238011
Sausenthaler	2007	LISA	prospective cohort	prospective	Specific food intake - maternal	milk	MILK	MATERNAL DAIRY INTAKE	mother-pregnancy-intake	Low	High maternal intake during pregnancy	HighestVSLowest	tertile-quartile-quintile	2=no	atopic	any	sIgEany	2	any	low-normal	Unclear	Unclear-high	Low	Low						1445	171	689	92							OR	0.93	0.67	1.28		OR	-0.138125	0.138483	-0.0725707	0.162975
Sausenthaler	2007	LISA	prospective cohort	prospective	Specific food intake - maternal	egg	EGG	MATERNAL EGG INTAKE	mother-pregnancy-intake	Low	High maternal intake during pregnancy	HighestVSLowest	tertile-quartile-quintile	2=no	atopic	any	sIgEany	2	any	low-normal	Unclear	Unclear-high	Low	Low						1568	192	563	71							OR	0.91	0.56	1.28		OR	-0.0336418	0.1485	-0.0943107	0.174067
Sausenthaler	2007	LISA	prospective cohort	prospective	Fatty acid	butter	ANIMAL- DAIRY- SATURATED	MATERNAL FAT INTAKE	mother-pregnancy-intake	Low	High maternal intake of butter during pregnancy	HighestVSLowest	tertile-quartile-quintile	2=no	atopic	any	sIgEany	2	any	low-normal	Unclear	Unclear-high	Low	Low						1350	163	753	96							OR	0.97	0.66	1.42		OR	-0.0620984	0.137536	-0.0304592	0.194447
Sausenthaler	2007	LISA	prospective cohort	prospective	Fatty acid	fish	FISH	MATERNAL FISH- OMEGA-3- PUFA- SEAFOOD INTAKE	mother-pregnancy-intake	Low	High maternal intake of fish during pregnancy	HighestVSLowest	tertile-quartile-quintile	2=no	atopic	any	sIgEany	2	any	low-normal	Unclear	Unclear-high	Low	Low						663	85	1458	177							OR	1.02	0.73	1.43		OR	0.062324	0.141157	0.0198026	0.172384
Sausenthaler	2007	LISA	prospective cohort	prospective	Specific food intake - maternal	apples	APPLE	MATERNAL FRUIT INTAKE	mother-pregnancy-intake	Low	High maternal intake during pregnancy	HighestVSLowest	tertile-quartile-quintile	2=no	atopic	any	sIgEany	2	any	low-normal	Unclear	Unclear-high	Low	Low						734	92	1397	170							OR	1.07	0.77	1.49		OR	0.0337293	0.138292	0.0676586	0.168937
Sausenthaler	2007	LISA	prospective cohort	prospective	Specific food intake - maternal	yoghurt	PROBIOTIC	MATERNAL PROBIOTIC	mother-pregnancy-intake	Low	High maternal intake during pregnancy	HighestVSLowest	tertile-quartile-quintile	2=no	atopic	any	sIgEany	2	any	low-normal	Unclear	Unclear-high	Low	Low						1154	132	981	132							OR	0.81	0.59	1.1		OR	-0.185458	0.131559	-0.210721	0.156138
Sausenthaler	2007	LISA	prospective cohort	prospective	Specific food intake - maternal	cabbage	GREEN- LEAFY VEGETABLES	MATERNAL VEGETABLE INTAKE	mother-pregnancy-intake	Low	High maternal intake during pregnancy	HighestVSLowest	tertile-quartile-quintile	2=no	atopic	any	sIgEany	2	any	low-normal	Unclear	Unclear-high	Low	Low						832	100	1295	164							OR	0.92	0.66	1.28		OR	-0.0596193	0.135454	-0.0833816	0.168491
Ivarsson	2002	Ivarsson, A.	CASE CONTROL	retrospective	SPECIFIC FOOD INTAKE -CHILD	gluten		INFANT GLUTEN INTAKE	infant-1st year-intake	<=16 grams /day	>16grams/day	HighestVSLowest	tertile-quartile-quintile	2=no	autoim	CD	CD	2	auto	low-normal	High	Unclear-high	Low	Low	392	188.16	203.84	212.84	413.16					OR	2	1.5	2.7	<0.001		OR	1.5	1.1	2.1		OR	0.693147	0.153115	0.405465	0.17167
Myleus	2012	Myleus, A.	CASE CONTROL	retrospective	SPECIFIC FOOD INTAKE - CHILD	GLUTEN FLOUR		INFANT GLUTEN INTAKE	infant-1st year-intake	SMALL-MEDIUM <=16grams/day	LARGE > 16grams/day	HighestVSLowest	tertile-quartile-quintile	2=no	autoim	CD	CD	< 2	auto	low-normal	High	Unclear-high	Low	Low	373	184	189	208	273											OR	1.9	1.4	2.6		OR	0.245122	0.138551	0.641854	0.160029
Calvani (FH-)	2006	APAL	retrospective cohort	retrospective	Fish intake	fish	FISH	MATERNAL FISH- OMEGA-3- PUFA- SEAFOOD INTAKE	mother-pregnancy-intake	1 time/month or less	2-3 times/wk or more	oftenVSnever-rare	freq(times/week)	2=no	atopic	cm	SPTcm	5	any	low-normal	Unclear	Unclear-high	Low	Low										OR						OR	0.05	0	0.54		OR			-2.99573	1.21405
Sicherer	2010	The Consortium of Food Allergy Research	prospective cohort	prospective	EGG-PREGNANCY	egg	EGG	MATERNAL EGG INTAKE	mother-pregnancy-intake	<2	>=2	oftenVSnever-rare	freq(times/week)	2=no	atopic	egg	sIgEegg	1	any	high	Low	Low	High	Unclear-High										OR	1.53	1.03	2.25			OR	1.75			0.026	OR	0.425268	0.196767
Calvani (FH-)	2006	APAL	retrospective cohort	retrospective	Fish intake	fish	FISH	MATERNAL FISH- OMEGA-3- PUFA- SEAFOOD INTAKE	mother-pregnancy-intake	1 time/month or less	2-3 times/wk or more	oftenVSnever-rare	freq(times/week)	2=no	atopic	egg	SPTegg	5	any	low-normal	Unclear	Unclear-high	Low	Low										OR						OR	0.33	0.1	1.07		OR			-1.10866	0.600164
DesRoches	2010	DesRoches, A.	CASE CONTROL	retrospective	SPECIFIC FOOD INTAKE-MOTHER LACTATION	allergenic food avoidance (egg)	EGG	MATERNAL EGG INTAKE	mother-lactation-intake	no consumption during pregnancy=yes avoidence	consumption during pregnancy =no avoidence	oftenVSnever-rare	yes-no	1=yes	atopic	FApn		<1.5	0to4	low-normal	High	Unclear-high	Low	Low	161	159	2	155	5											OR	1.27	0.67	2.38		OR	0.94177	0.84424	0.239017	0.320451
Lack	2003	ALSPAC	prospective cohort	prospective	Soybean meat	allergenic food avaoidence (soybean meat)	LEGUMES	MATERNAL VEGETABLE INTAKE	mother-pregnancy-intake	NO intake	YES-intake	oftenVSnever-rare	yes-no	2=no	atopic	FApn		5.5	5to14	low-normal	High	Unclear-high	Low	Low						877	1	10475	22	OR	0.54	0.07	4.02							NOT TESTED	OR	-0.616186	1.02422
Binkley	2011	Binkley, K. E.	CASE CONTROL	retrospective	SPECIFIC FOOD INTAKE - MATERNAL	allergenic food avoidance (peanut)	NUTS	MATERNAL VEGETABLE INTAKE	mother-pregnancy-intake	reduced intake of peanuts/peanut products -none	reduced intake of peanuts/peanut products during pregnancy - 'completely'	oftenVSnever-rare	yes-no	1=yes	atopic	FApn		5to14	5to14	high	High	Unclear-high	Low	Low	1300	71	1013	11	82					OR	0.53	0.27	1.03								OR	-0.634878	0.338999
DesRoches	2010	DesRoches, A.	CASE CONTROL	retrospective	SPECIFIC FOOD INTAKE-MOTHER LACTATION	allergenic food avoidance (nut)	NUTS	MATERNAL VEGETABLE INTAKE	mother-lactation-intake	no consumption during pregnancy=yes avoidence	consumption during pregnancy =no avoidence	oftenVSnever-rare	yes-no	1=yes	atopic	FApn		<1.5	0to4	low-normal	High	Unclear-high	Low	Low	160	132	28	110	49											OR	1.5	0.9	2.52		OR	0.741937	0.269795	0.405465	0.264691
Fox	2009	Fox, A. T.	CASE CONTROL	retrospective	SPECIFIC FOOD INTAKE - MATERNAL	peanut	NUTS	MATERNAL VEGETABLE INTAKE	mother-pregnancy-intake	no peanut consumption in pregnancy	15+	oftenVSnever-rare	tertile-quartile-quintile	2=no	atopic	FApn		<4	0to4	low-normal	Unclear	Unclear-high	Unclear	Unclear-High	133									OR	1.19	0.6	2.4								OR	0.173953	0.357916
Nwaru	2010	DIPP	prospective cohort	prospective	age at introduction to FRUITS AND BERRIES	fruits and berries	FRUIT	INFANT FRUIT INTRODUCTION	infant-1st year-intro	< 3.46	>4	0to4	categ(months)	2=no	atopic	food	sIgEfood	5	any	low-normal	Low	Low	Low	Low										OR	1.41	0.91	2.19			OR	1.7	1	2.9		OR	0.34359	0.224649	0.530628	0.272491
Nwaru	2010	DIPP	prospective cohort	prospective	age at introduction to POTATOES	potatoes	POTATO-CARROT-ROOT VEGETABLES	INFANT VEGETABLE INTRODUCTION	infant-1st year-intro	<3.1	>4	0to4	categ(months)	2=no	atopic	food	sIgEfood	5	any	low-normal	Low	Low	Low	Low										OR	1.74	1.12	2.7			OR	2.56	1.49	4.39		OR	0.553885	0.224167	0.940007	0.275164
Nwaru	2010	DIPP	prospective cohort	prospective	age at introduction to RED MEET	meat		INFANT MEAT INTRODUCTION	infant-1st year-intro	<5.1	>5.5	5to7	categ(months)	2=no	atopic	food	sIgEfood	5	any	low-normal	Low	Low	Low	Low										OR	1.35	0.94	1.95			OR	1.65	1.07	2.55		OR	0.300105	0.187615	0.500775	0.222101
Sausenthaler	2007	LISA	prospective cohort	prospective	Specific food intake - maternal	milk	MILK	MATERNAL DAIRY INTAKE	mother-pregnancy-intake	Low	High maternal intake during pregnancy	HighestVSLowest	tertile-quartile-quintile	2=no	atopic	food	sIgEfood	2	any	low-normal	Unclear	Unclear-high	Low	Low						1450	129	691	70							OR	0.95	0.66	1.37		OR	-0.143496	0.156221	-0.0512933	0.186788
Sausenthaler	2007	LISA	prospective cohort	prospective	Specific food intake - maternal	egg	EGG	MATERNAL EGG INTAKE	mother-pregnancy-intake	Low	High maternal intake during pregnancy	HighestVSLowest	tertile-quartile-quintile	2=no	atopic	food	sIgEfood	2	any	low-normal	Unclear	Unclear-high	Low	Low						1572	148	566	51							OR	0.9	0.63	1.38		OR	0.0483285	0.170319	-0.105361	0.218084
Calvani (FH+)	2006	APAL	retrospective cohort	retrospective	Butter intake pregnancy	butter	ANIMAL- DAIRY- SATURATED	MATERNAL FAT INTAKE	mother-pregnancy-intake	1 time/month or less	2-3 times/wk or more	oftenVSnever-rare	freq(times/week)	2=no	atopic	food	SPTfood	5	any	high	Unclear	Unclear-high	Low	Low										OR	1	0.37	2.67			OR	0.84	0.26	2.71		OR	0	0.50106	-0.174353	0.597603
Sausenthaler	2007	LISA	prospective cohort	prospective	Fatty acid	butter	ANIMAL- DAIRY- SATURATED	MATERNAL FAT INTAKE	mother-pregnancy-intake	Low	High maternal intake of butter during pregnancy	HighestVSLowest	tertile-quartile-quintile	2=no	atopic	food	sIgEfood	2	any	low-normal	Unclear	Unclear-high	Low	Low						1354	122	756	73							OR	0.93	0.6	1.43		OR	-0.0763377	0.155471	-0.0725707	0.219513
Nwaru	2010	DIPP	prospective cohort	prospective	Specific food exposures - Maternal [pregnancy]	fat - n6	OMEGA 6- MUFA	MATERNAL FAT INTAKE	mother-pregnancy-intake	2nd and 3rd quartile of n-6 PUFA intake	4th quartile of n-6 PUFA intake	HighestVSLowest	tertile-quartile-quintile	2=no	atopic	food	SPTfood	5	any	low-normal	Low	Low	Low	Low										OR	0.77	0.5	1.19			OR	0.69	0.42	1.13		OR	-0.261365	0.222101	-0.371064	0.251674
Calvani	2006	APAL	retrospective cohort	retrospective	Fish intake	fish	FISH	MATERNAL FISH- OMEGA-3- PUFA- SEAFOOD INTAKE	mother-pregnancy-intake	1 time/month or less	2-3 times/wk or more	oftenVSnever-rare	freq(times/week)	2=no	atopic	food	SPTfood	5	any	low-normal	Unclear	Unclear-high	Low	Low										OR						OR	0.42	0.17	1.02		OR			-0.867501	0.452706
Sausenthaler	2007	LISA	prospective cohort	prospective	Fatty acid	fish	FISH	MATERNAL FISH- OMEGA-3- PUFA- SEAFOOD INTAKE	mother-pregnancy-intake	Low	High maternal intake of fish during pregnancy	HighestVSLowest	tertile-quartile-quintile	2=no	atopic	food	sIgEfood	2	any	low-normal	Unclear	Unclear-high	Low	Low						664	66	1464	133							OR	1.01	0.69	1.48		OR	0.0994007	0.15841	0.00995033	0.194945
Nwaru	2010	DIPP	prospective cohort	prospective	Specific food exposures - Maternal [pregnancy]	fat - PUFA	OMEGA 3- PUFA	MATERNAL FISH- OMEGA-3- PUFA- SEAFOOD INTAKE	mother-pregnancy-intake	2nd and 3rd quartile of PUFA intake	4th quartile of PUFA intake	HighestVSLowest	tertile-quartile-quintile	2=no	atopic	food	SPTfood	5	any	low-normal	Low	Low	Low	Low										OR	0.86	0.56	1.32			OR	0.81	0.5	1.33		OR	-0.150823	0.218599	-0.210721	0.25301
Sausenthaler	2007	LISA	prospective cohort	prospective	Specific food intake - maternal	apples	APPLE	MATERNAL FRUIT INTAKE	mother-pregnancy-intake	Low	High maternal intake during pregnancy	HighestVSLowest	tertile-quartile-quintile	2=no	atopic	food	sIgEfood	2	any	low-normal	Unclear	Unclear-high	Low	Low						736	71	1402	127							OR	1.01	0.7	1.46		OR	0.0694072	0.155713	0.00995033	0.188003
Sausenthaler	2007	LISA	prospective cohort	prospective	Specific food intake - maternal	yoghurt	PROBIOTIC	MATERNAL PROBIOTIC	mother-pregnancy-intake	Low	High maternal intake during pregnancy	HighestVSLowest	tertile-quartile-quintile	2=no	atopic	food	sIgEfood	2	any	low-normal	Unclear	Unclear-high	Low	Low						1156	104	986	96							OR	0.89	0.62	1.27		OR	-0.0871842	0.148682	-0.116534	0.181403
Sausenthaler	2007	LISA	prospective cohort	prospective	Specific food intake - maternal	cabbage	GREEN- LEAFY VEGETABLES	MATERNAL VEGETABLE INTAKE	mother-pregnancy-intake	Low	High maternal intake during pregnancy	HighestVSLowest	tertile-quartile-quintile	2=no	atopic	food	sIgEfood	2	any	low-normal	Unclear	Unclear-high	Low	Low						834	74	1300	126							OR	0.84	0.58	1.22		OR	-0.0973632	0.15368	-0.174353	0.19041
Ellis	2012	CLARITY	case control	retrospective	Specific food exposure - maternal	alcohol		MATERNAL ALCOHOL INTAKE	mother-pregnancy-intake	no alcohol consumption in pregnancy	Any alcohol during pregnancy	oftenVSnever-rare	yes-no	2=no	autoim	JIA		0-18	auto	low-normal	Unclear	Unclear-high	Low	Low	246	43	179	82	366					OR						OR	0.97	0.44	2.16		OR	0.0697284	0.209212	-0.0304592	0.408453
Ellis	2012	CLARITY	case control	retrospective	Specific food exposure - maternal	coffee	COFFEE	MATERNAL COFFEE INTAKE	mother-pregnancy-intake	no coffee during pregnancy	Any coffee during pregnancy	oftenVSnever-rare	yes-no	2=no	autoim	JIA		0-18	auto	low-normal	Unclear	Unclear-high	Low	Low	246	127	93	245	203					OR						OR	0.66	0.36	1.22		OR	0.123535	0.166236	-0.415515	0.313452
Ellis	2012	CLARITY	case control	retrospective	fish oil	fish oils	OTHER FISH OILS	MATERNAL FISH OIL SUPPLEMENT	mother-pregnancy-suppl	No fish oil supplementation	Fish oil supplementation	oftenVSnever-rare	yes-no	2=no	autoim	JIA		0-18	auto	low-normal	Unclear	Unclear-high	Low	Low	246	6	210	26	383					OR						OR	0.7	0.15	3.36		OR	-0.86541	0.460978	-0.356675	0.800314
Kemp	2011	Tasmania Infant Health study (THIS)	prospective cohort	prospective	peanut	allergenic food avoidence (peanut)	NUTS	MATERNAL VEGETABLE INTAKE	mother-pregnancy-intake	never	ever	oftenVSnever-rare	yes-no	1=yes	atopic	pn	sIgEpn	16	any	low-normal	High	Unclear-high	High	Unclear-High																RR	0.71	0.34	1.49		RR			-0.34249	0.378197
Sicherer	2010	The Consortium of Food Allergy Research	prospective cohort	prospective	PEANUT-LACTATION	peanut	NUTS	MATERNAL VEGETABLE INTAKE	mother-lactation-intake	<2	>=2	oftenVSnever-rare	freq(times/week)	2=no	atopic	pn	sIgEpn	1	any	high	Low	Low	High	Unclear-High										OR	1.57	1.02	2.42		(Additional analyses of peanut specific IgE sensitization (>0.35 kUA/L) and linear regression modeling was performed. Univariate analyses were also performed for detectable peanut IgE (>0.35 kUA/L), and results showed similar trends and conclusions as those for peanut IgE >5 kUA/L.)					NS	OR	0.451076	0.220761
Dean	2007	Isle of Wight	prospectvie cohort	prospective	SPECIFIC FOOD INTAKE - MATERNAL	allergenic food avoidence (peanut)	NUTS	MATERNAL VEGETABLE INTAKE	mother-pregnancy-intake	No peanut avoidance during pregnancy	Peanut avoidance during pregnancy	oftenVSnever-rare	yes-no	1=yes	atopic	pn	SPTpn	2	any	low-normal	High	Unclear-high	Low	Low						428	10	230	3	OR					note denominators are estimated based on the total number avoiding/not avoiding peanut in the whole population assessed - only 76% of this population underwent outcome assessment ie spt. I think it is still valid to use these numbers						OR	0.593441	0.663424
Andreasyan	2007	Tasmanian Infant Health Survey- >CARHS	prospectvie cohort	prospective	SPECIFIC FOOD INTAKE - CHILD	honey	HONEY	INFANT CONFECTIONERY INTRODUCTION	infant-1st year-intro	>1	<=1	0to4	categ(months)	1=yes	atopic	RC		9	5to14	low-normal	Unclear	Unclear-high	Low	Low										RR	1.17	0.58	2.34			RR	1.31	0.65	2.64		RR	0.157004	0.353647	0.270027	0.357526
Kull	2006	BAMSE	prospective cohort	prospective	FISH	fish	any fish	INFANT FISH- FISH OIL INTAKE	infant-1st year-intake	<=1 time/mo	> =2-3 time/mo	oftenVSnever-rare	freq(times/week)	2=no	atopic	RC		4	0to4	low-normal	Low	Low	Low	Low						2901	261	706	112							OR	0.57	0.45	0.73		OR	-0.645633	0.121747	-0.562119	0.126229
Magnussonm	2013	BAMSE	prospective cohort	prospective	FISH	fish	any fish	INFANT FISH- FISH OIL INTAKE	infant-1st year-intake	<=1 time/mo	> =2-3 time/mo	oftenVSnever-rare	freq(times/week)	2=no	atopic	RC		12	5to14	low-normal	Low	Low	Low	Low																OR	0.78	0.63	0.95		OR			-0.248461	0.100596
Alm	2012	Infants of Western Sweden	prospective cohort	prospective	FISH	fish	any fish	INFANT FISH- FISH OIL INTAKE	infant-1st year-intake	<1	>1	oftenVSnever-rare	freq(times/week)	2=no	atopic	RC		4	0to4	low-normal	Low	Low	Low	Low										OR	0.43	0.29	0.62	<0.001							OR	-0.84397	0.186701
Andreasyan	2007	Tasmanian Infant Health Survey- >CARHS	prospectvie cohort	prospective	SPECIFIC FOOD INTAKE - CHILD	fruit syrup	FRUIT JUICE-SYRUP	INFANT FRUIT INTRODUCTION	infant-1st year-intro	>1	<=1	0to4	categ(months)	1=yes	atopic	RC		9	5to14	low-normal	Unclear	Unclear-high	Low	Low										RR	1.17	0.78	1.77			RR	1.19	0.78	1.81		RR	0.157004	0.211212	0.173953	0.213966
Andreasyan	2007	Tasmanian Infant Health Survey- >CARHS	prospectvie cohort	prospective	SPECIFIC FOOD INTAKE - CHILD	Non-milk fluids	ANY NON-MILK FLUID	INFANT NON-MILK FLUID INTRODUCTION	infant-1st year-intro	>1	<=1	0to4	categ(months)	2=no	atopic	RC		9	5to14	low-normal	Unclear	Unclear-high	Low	Low										RR	0.86	0.31	2.38			RR	0.84	0.3	2.36		RR	-0.150823	0.519349	-0.174353	0.527048
Erkkola	2012	DIPP	prospective cohort	prospective	cereals during pregnancy	cereal	OTHER- UNCLEAR	MATERNAL CEREAL INTAKE	mother-pregnancy-intake	155.0-246.2	246.2-772.9	HighestVSLowest	tertile-quartile-quintile	2=no	atopic	RC		5	5to14	low-normal	High	Unclear-high	Low	Low										HR	0.92	0.69	1.23			HR	0.89	0.62	1.28		HR	-0.0833816	0.148161	-0.116534	0.185405
Erkkola	2012	DIPP	prospective cohort	prospective	chocolate pregnancy	chocolate	CONFECTIONERY	MATERNAL CONFECTIONERY- SWEET DRINK INTAKE	mother-pregnancy-intake	7.14-26.7	26.7-250.4	HighestVSLowest	tertile-quartile-quintile	2=no	atopic	RC		5	5to14	low-normal	High	Unclear-high	Low	Low										HR	1.05	0.8	1.38			HR	1.24	0.9	1.7		HR	0.0487902	0.139435	0.215111	0.160978
Maslova	2013	DANISH BIRTH COHORT	prospective cohort	prospective	artificially-swetened non-corbonated soft drinks consumption during pregnancy	artificially-swetened non-corbonated soft drinks	SWEET DRINK	MATERNAL CONFECTIONERY- SWEET DRINK INTAKE	mother-pregnancy-intake	0	>= 1 /DAY	oftenVSnever-rare	freq(times/week)	2=no	atopic	RC		1.5	0to4	low-normal	Low	Low	Low	Low										OR	0.97	0.84	1.11			OR	1.03	0.86	1.24		OR	-0.0304592	0.0687853	0.0295588	0.0946697
Maslova	2013	DANISH BIRTH COHORT	prospective cohort	prospective	artificially-swetened corbonated soft drinks consumption during pregnancy	artificially-swetened corbonated soft drinks	SWEET DRINK	MATERNAL CONFECTIONERY- SWEET DRINK INTAKE	mother-pregnancy-intake	0	>= 1 /DAY	oftenVSnever-rare	freq(times/week)	2=no	atopic	RC		7	5to14	low-normal	Low	Low	Low	Low										OR	1.11	0.87	1.41			OR	1.31	0.98	1.74		OR	0.10436	0.122056	0.270027	0.144825
Erkkola	2012	DIPP	prospective cohort	prospective	milks	milk	MILK	MATERNAL DAIRY INTAKE	mother-pregnancy-intake	214.0-766.4	766.4-2756.3	HighestVSLowest	tertile-quartile-quintile	2=no	atopic	RC		5	5to14	low-normal	High	Unclear-high	Low	Low										HR	0.81	0.62	1.06			HR	0.85	0.61	1.19		HR	-0.210721	0.13724	-0.162519	0.17167
Nwaru	2012	DIPP	prospective cohort	prospective	Specific food intake - maternal [pregnancy]	fat	OTHER- UNCLEAR	MATERNAL FAT INTAKE	mother-pregnancy-intake	Second/third quartile of intake	Highest quartile	HighestVSLowest	tertile-quartile-quintile	2=no	atopic	RC		5	5to14	low-normal	Low	Low	Low	Low										HR	0.96	0.75	1.24			HR	0.98	0.75	1.27		HR	-0.040822	0.130578	-0.0202027	0.132255
Willers	2007	ABERDEEN COHORT	prospectvie cohort	prospective	SPECIFIC FOOD INTAKE - MATERNAL	fish (fatty)	OILY FISH	MATERNAL FISH- OMEGA-3- PUFA- SEAFOOD INTAKE	mother-pregnancy-intake	never	?1/week	oftenVSnever-rare	freq(times/week)	2=no	atopic	RC		5	5to14	low-normal	Low	Low	Low	Low										OR	0.38	0.15	0.98	0.155		OR	0.37	0.14	0.98	0.159	OR	-0.967584	0.483358	-0.994252	0.496964
Nwaru	2012	DIPP	prospective cohort	prospective	Specific food intake - maternal [pregnancy]	fat - PUFA	OMEGA 3- PUFA	MATERNAL FISH- OMEGA-3- PUFA- SEAFOOD INTAKE	mother-pregnancy-intake	Second/third quartile of intake	Highest quartile	HighestVSLowest	tertile-quartile-quintile	2=no	atopic	RC		5	5to14	low-normal	Low	Low	Low	Low										HR	0.75	0.57	0.97	<0.05		HR	0.73	0.55	0.96		HR	-0.287682	0.131236	-0.314711	0.139739
Erkkola	2012	DIPP	prospective cohort	prospective	vegetable fruits	fruits and vegetables	ANY	MATERNAL FRUIT AND VEGETABLE INTAKE	mother-pregnancy-intake	49.5-138.7	138.7-749	HighestVSLowest	tertile-quartile-quintile	2=no	atopic	RC		5	5to14	low-normal	High	Unclear-high	Low	Low										HR	1.12	0.87	1.45		joint p value = 0.342	HR	0.93	0.68	1.27		HR	0.113329	0.131752	-0.0725707	0.158973
Erkkola	2012	DIPP	prospective cohort	prospective	fruits	fruits	ANY FRUIT	MATERNAL FRUIT INTAKE	mother-pregnancy-intake	326.2-793.9	<326.2	HighestVSLowest	tertile-quartile-quintile	1=yes	atopic	RC		5	5to14	low-normal	High	Unclear-high	Low	Low										HR	0.89	0.68	1.16		joint p value = 0.679	HR	0.85	0.61	1.2		HR	-0.116534	0.135181	-0.162519	0.175939
Erkkola	2012	DIPP	prospective cohort	prospective	meat	meat		MATERNAL MEAT INTAKE	mother-pregnancy-intake	119.2-197.7	197.7-764.7	HighestVSLowest	tertile-quartile-quintile	2=no	atopic	RC		5	5to14	low-normal	High	Unclear-high	Low	Low										HR	1.02	0.78	1.33			HR	0.95	0.67	1.33		HR	0.0198026	0.135396	-0.0512933	0.17167
Erkkola	2012	DIPP	prospective cohort	prospective	fermented milk products pregnancy	fermented milk products	FERMENTED MILK	MATERNAL PROBIOTIC	mother-pregnancy-intake	100.0-309.6	309.6-3326.8	HighestVSLowest	tertile-quartile-quintile	2=no	atopic	RC		5	5to14	low-normal	High	Unclear-high	Low	Low										HR	1.04	0.81	1.34			HR	0.89	0.65	1.24		HR	0.0392207	0.129311	-0.116534	0.169207
Erkkola	2012	DIPP	prospective cohort	prospective	total vegetables	vegetables	ANY VEGETABLE	MATERNAL VEGETABLE INTAKE	mother-pregnancy-intake	149.1-315.1 g/d	312.1-2532.2	HighestVSLowest	tertile-quartile-quintile	2=no	atopic	RC		5	5to14	low-normal	High	Unclear-high	Low	Low										HR	1.13	0.87	1.47		joint p value = 0.532	HR	1.07	0.78	1.47		HR	0.122218	0.134207	0.0676586	0.162043
Maslova	2012	DANISH BIRTH COHORT	prospective cohort	prospective	TREE NUTS intake during pregnancy	nuts (tree nuts)	NUTS	MATERNAL VEGETABLE INTAKE	mother-pregnancy-intake	0	2TO3	oftenVSnever-rare	freq(times/week)	2=no	atopic	RC		7	5to14	low-normal	Low	Low	Low	Low										OR	0.97	0.87	1.08			OR	0.99	0.86	1.14		OR	-0.0304592	0.0548062	-0.0100503	0.0719789
Marini	1996	Marini	prospective cohort (of RCT-CCT)	prospective	CITRUS FRUIT	citrus fruits	FRUIT	INFANT FRUIT INTRODUCTION	infant-1st year-intro	>=4	<4	0to4	categ(months)	1=yes	atopic	RC		3	0to4	high	Unclear	Unclear-high	Unclear	Unclear-High																OR	0.9	0.2	1.2		OR			-0.105361	0.146777
Marini	1996	Marini	prospective cohort (of RCT-CCT)	prospective	BEEF	meat		INFANT MEAT INTRODUCTION	infant-1st year-intro	>=6	<6	5to7	categ(months)	1=yes	atopic	RC		3	0to4	high	Unclear	Unclear-high	Unclear	Unclear-High																OR	0.7	0.2	1.2		OR			-0.356675	0.274998
Bertelsen	2013	Norwegian Mother & Child Cohort Study	prospective cohort	prospective	Probiotic-pregnancy	PROBIOTICS	PROBIOTIC	MATERNAL PROBIOTIC	mother-pregnancy-intake	no	yes	oftenVSnever-rare	yes-no	2=no	atopic	RC		3	0to4	low-normal	Unclear	Unclear-high	Unclear	Unclear-High																OR	0.87	0.77	0.98		OR			-0.139262	0.0607446
Norris	1996	DAISY	nested case-control	prospective	SPECIFIC FOOD INTAKE - CHILD	fruits and vegatables	ANY	INFANT FRUIT AND VEG INTRODUCTION	infant-1st year-intro		0-6	5to7	categ(months)	2=no	autoim	TIDM	TIDM-Ab	<7	auto	high	Low	Low	Low	Low	18	7.92	10.08	79.56	73.44											OR	0.73	0.27	1.95		OR	-0.321205	0.501652	-0.314711	0.501296
Virtanen	2011	DIPP	prospective cohort	prospective	Age at introduction of allergenic food - Fruits and berries	fruits and berries	FRUIT	INFANT FRUIT INTRODUCTION	infant-1st year-intro	0-3.5	4+	0to4	categ(months)	2=no	autoim	TIDM	TIDM-Ab	<10	auto	high	Low	Low	Low	Low	237					1748	65	1586	73							HR	0.666667	0.469484	0.943396	0.06	HR			-0.405465	0.177141
Visalli	2003	EURODIAB Italy	CASE CONTROL	retrospective	SPECIFIC FOOD INTAKE - CHILD	fruits	FRUIT	INFANT FRUIT INTRODUCTION	infant-1st year-intro	?3	<3	0to4	categ(months)	1=yes	autoim	TIDM	TIDM	12	auto	low-normal	Unclear	Unclear-high	Low	Low	150									OR	0.4	0.05	3.09								OR	-0.916291	1.04309
Virtanen	2011	DIPP	prospective cohort	prospective	Age at introduction of allergenic food - Root vegetables	root vegetables	POTATO-CARROT-ROOT VEGETABLES	INFANT VEGETABLE INTRODUCTION	infant-1st year-intro	0-3	4+	0to4	categ(months)	2=no	autoim	TIDM	TIDM-Ab	<10	auto	high	Low	Low	Low	Low	237					1091	35	1163	48							HR	0.571429	0.363636	0.900901	0.006	HR			-0.559616	0.232273
Visalli	2003	EURODIAB Italy	CASE CONTROL	retrospective	TIMING OF FIRST NON-MILK FOOD INTRODUCTION [INFANT]	vegetables	VEGETABLES	INFANT VEGETABLE INTRODUCTION	infant-1st year-intro	?3	<3	0to4	categ(months)	1=yes	autoim	TIDM	TIDM	12	auto	low-normal	Unclear	Unclear-high	Low	Low	150									OR	0.76	0.09	6.27								OR	-0.274437	1.07664
Savilahti	2009	Savilhati, E.	nested case-control	prospective	AGE OF VEGETABLES [USUAL FIRST NON-MILK FEED IN THIS POPULATION] INTRODUCTION	vegetables	VEGETABLES	INFANT VEGETABLE INTRODUCTION	infant-1st year-intro	<3.9	3.9+	0to4	categ(months)	2=no	autoim	TIDM	TIDM	11.5	auto	low-normal	High	Unclear-high	Low	Low	45	22	11	2688	2319																OR	0.545486	0.37036
Wahlberg	2005	ABIS	prospectvie cohort	prospective	Specific Food Exposure - Infant	gluten		INFANT GLUTEN INTAKE	infant-1st year-intake	Low	High	HighestVSLowest	low-high	2=no	autoim	TIDM	TIDM-Ab	2	auto	low-normal	High	Unclear-high	Low	Low	1282					2729	15	3607	3							OR	2.9	1.5	5.5	0.001	OR	1.89306	0.632966	1.06471	0.32655
Norris	1996	DAISY	nested case-control	prospective	SPECIFIC FOOD INTAKE - CHILD	meat		INFANT MEAT INTRODUCTION	infant-1st year-intro		0-6	5to7	categ(months)	2=no	autoim	TIDM	TIDM-Ab	<7	auto	high	Low	Low	Low	Low	18	1.98	16.02	4.59	148.41											OR	4.66	0.91	23.8		OR	1.38536	0.889986	1.53902	0.831975
Visalli	2003	EURODIAB Italy	CASE CONTROL	retrospective	SPECIFIC FOOD INTAKE - CHILD	meat		INFANT MEAT INTRODUCTION	infant-1st year-intro	?3	<3	0to4	categ(months)	1=yes	autoim	TIDM	TIDM	12	auto	low-normal	Unclear	Unclear-high	Low	Low	150									OR	1.77	0.18	17.25								OR	0.57098	1.16165
Wahlberg	2005	ABIS	prospectvie cohort	prospective	Specific Food Exposure - Infant	milk		INFANT MILK INTAKE	infant-1st year-intake	Low	high	HighestVSLowest	low-high	2=no	autoim	TIDM	TIDM-Ab	2	auto	low-normal	High	Unclear-high	Low	Low	1282					126	2	642	35							OR	2.9	1.5	5.5	0.001	OR	-1.27395	0.733678	1.06471	0.32655
Virtanen	2011	DIPP	prospective cohort	prospective	SPECIFIC FOOD INTAKE - MATERNAL	alcohol		MATERNAL ALCOHOL INTAKE	mother-pregnancy-intake	No alcohol	Alcohol during pregnancy	oftenVSnever-rare	yes-no	2=no	autoim	TIDM	TIDM-Ab	<10	auto	high	Low	Low	Low	Low	165															HR	1.16	0.81	1.66		HR			0.14842	0.182856
Sipetic	2005	Sipetic, S.	CASE CONTROL	retrospective	SPECIFIC FOOD INTAKE - MATERNAL	alcohol		MATERNAL ALCOHOL INTAKE	mother-pregnancy-intake	no alcohol consumption in pregnancy	yes alcohol consumption in pregnancy	oftenVSnever-rare	yes-no	2=no	autoim	TIDM	TIDM	?16	auto	low-normal	High	Unclear-high	Low	Low	105	16	89	6	204									<0.001						NS	OR	1.81031	0.495282
Brekke	2010	ABIS	prospectvie cohort	prospective	MATERNAL INTAKE PREGNANCY/Coffee	coffee	COFFEE	MATERNAL COFFEE INTAKE	mother-pregnancy-intake	daily	never	oftenVSnever-rare	freq(times/week)	1=yes	autoim	TIDM	TIDM-Ab	5	auto	low-normal	Unclear	Unclear-high	Low	Low	191									OR	0.63	0.42	0.94			OR	0.67	0.41	1.1		OR	-0.462035	0.204163	-0.400478	0.252953
Virtanen	2011	DIPP	prospective cohort	prospective	SPECIFIC FOOD INTAKE - MATERNAL	coffee	COFFEE	MATERNAL COFFEE INTAKE	mother-pregnancy-intake	Q1 lowest	Q4 highest	HighestVSLowest	tertile-quartile-quintile	2=no	autoim	TIDM	TIDM-Ab	<10	auto	high	Low	Low	Low	Low	165															HR	0.59	0.37	0.96		HR			-0.527633	0.248373
Visalli	2003	EURODIAB Italy	CASE CONTROL	retrospective	SPECIFIC FOOD INTAKE - MATERNAL	coffee	COFFEE	MATERNAL COFFEE INTAKE	mother-pregnancy-intake	No coffee during pregnancy	Coffee during pregnancy	oftenVSnever-rare	yes-no	2=no	autoim	TIDM	TIDM	12	auto	low-normal	Unclear	Unclear-high	Low	Low	150									OR	0.89	0.6	1.31								OR	-0.116534	0.197225
Rosenbauer	2007	EURODIAB-Germany	case control	retrospective	Specific food intake - maternal	coffee	COFFEE	MATERNAL COFFEE INTAKE	mother-pregnancy-intake	No coffee	at least 3 cups per day	oftenVSnever-rare	tertile-quartile-quintile	2=no	autoim	TIDM	TIDM	<5	auto	low-normal	High	Unclear-high	Low	Low	760	200	187	159	158					OR	1.07	0.79	1.44			OR				NS	OR	0.0676586	0.151523
Rosenbauer	2008	Rosenbauer, J.	case control	retrospective	SPECIFIC FOOD INTAKE - MOTHER	coffee	COFFEE	MATERNAL COFFEE INTAKE	mother-pregnancy-intake	no coffee during pregnancy	3+ cups per day	oftenVSnever-rare	tertile-quartile-quintile	2=no	autoim	TIDM	TIDM	<5	auto	low-normal	Unclear	Unclear-high	Low	Low	760	222	247	684	473					OR	0.83	0.64	1.07	0.142						NS	OR	-0.18633	0.129586
Sipetic	2005	Sipetic, S.	CASE CONTROL	retrospective	SPECIFIC FOOD INTAKE - MATERNAL	coffee	COFFEE	MATERNAL COFFEE INTAKE	mother-pregnancy-intake	no coffee consumption in pregnancy	yes coffee consumption in pregnancy	oftenVSnever-rare	yes-no	2=no	autoim	TIDM	TIDM	?16	auto	low-normal	High	Unclear-high	Low	Low	105	86	19	128	82									<0.001						NS	OR	1.0646	0.290288
Sipetic	2005	Sipetic, S.	CASE CONTROL	retrospective	SPECIFIC FOOD INTAKE - MATERNAL	coca cola	SWEET DRINK	MATERNAL CONFECTIONERY- SWEET DRINK INTAKE	mother-pregnancy-intake	no coca -cola consumption in pregnancy	yes coca -cola consumption in pregnancy	oftenVSnever-rare	yes-no	2=no	autoim	TIDM	TIDM	?16	auto	low-normal	High	Unclear-high	Low	Low	105	23	82	16	194									0.001						NS	OR	1.22404	0.351181
Brekke	2010	ABIS	prospectvie cohort	prospective	MATERNAL INTAKE PREGNANCY/Milk/sour milk/yoghurt	milk	MILK	MATERNAL DAIRY INTAKE	mother-pregnancy-intake	No milk	1-2 dL/day	oftenVSnever-rare	yes-no	2=no	autoim	TIDM	TIDM-Ab	5	auto	low-normal	Unclear	Unclear-high	Low	Low	191									OR	1.02	0.74	1.42			OR	1.05	0.71	1.55		OR	0.0198026	0.168803	0.0487902	0.198707
Niinisto	2012	DIPP	prospectvie cohort	prospective	Specific food intake - maternal	milk	MILK	MATERNAL DAIRY INTAKE	mother-pregnancy-intake	Not low maternal consumtion of fresh milk during lactation - intermediate half of intake	Low maternal consumption of fresh milk during lactation - lowest quarter	HighestVSLowest	tertile-quartile-quintile	1=yes	autoim	TIDM	TIDM-Ab	<10	auto	high	Unclear	Unclear-high	Low	Low	143															HR	2.04	1.16	3.58		HR			0.71295	0.286945
Brekke	2010	ABIS	prospectvie cohort	prospective	MATERNAL INTAKE PREGNANCY/Eggs	egg	EGG	MATERNAL EGG INTAKE	mother-pregnancy-intake	1-2 times/week	<1 time/week	oftenVSnever-rare	freq(times/week)	1=yes	autoim	TIDM	TIDM-Ab	5	auto	low-normal	Unclear	Unclear-high	Low	Low	191									OR	0.851	0.63	1.15			OR	0.84	0.58	1.21		OR	-0.161343	0.153625	-0.174353	0.186211
Virtanen	2011	DIPP	prospective cohort	prospective	SPECIFIC FOOD INTAKE - MATERNAL	margarine	MARGARINE	MATERNAL FAT INTAKE	mother-pregnancy-intake	No vegetable margarines	Vegetable margarines during pregnancy	oftenVSnever-rare	yes-no	2=no	autoim	TIDM	TIDM-Ab	<10	auto	high	Low	Low	Low	Low	165															HR	1.21	0.86	1.69		HR			0.19062	0.170463
Fronczak	2003	DAISY	prospective cohort	prospective	Maternal intake of linoleic acid during pregnancy	fat - n6(linoleic acid)	OMEGA 6- MUFA	MATERNAL FAT INTAKE	mother-pregnancy-intake	<7.92g/day	>11.78g/day	HighestVSLowest	tertile-quartile-quintile	2=no	autoim	TIDM	TIDM-Ab	4	auto	high	Unclear	Unclear-high	Low	Low	16					73	4	75	4	HR	1.04	0.26	4.16	0.955						NS	HR	0.0392207	0.707293
Brekke	2010	ABIS	prospectvie cohort	prospective	MATERNAL INTAKE PREGNANCY/Open sea fish	fish /(open sea)	FISH	MATERNAL FISH- OMEGA-3- PUFA- SEAFOOD INTAKE	mother-pregnancy-intake	<1/week	1-2 times/week	oftenVSnever-rare	freq(times/week)	2=no	autoim	TIDM	TIDM-Ab	5	auto	low-normal	Unclear	Unclear-high	Low	Low	191									OR	0.75	0.53	1.08			OR	0.76	0.5	1.18		OR	-0.287682	0.186042	-0.274437	0.224465
Fronczak	2003	DAISY	prospective cohort	prospective	Maternal intake of EPAand DHA during pregnancy	fat - n3 (EPA and DHA )	OMEGA 3- PUFA	MATERNAL FISH- OMEGA-3- PUFA- SEAFOOD INTAKE	mother-pregnancy-intake	<0.10g/day	?0.10g/day	HighestVSLowest	tertile-quartile-quintile	2=no	autoim	TIDM	TIDM-Ab	4	auto	high	Unclear	Unclear-high	Low	Low	16					146	9	76	7	HR	0.64	0.24	1.71	0.38						NS	HR	-0.446287	0.501419
Sipetic	2005	Sipetic, S.	CASE CONTROL	retrospective	SPECIFIC FOOD INTAKE - MATERNAL	nitrosoamines		MATERNAL MEAT INTAKE	mother-pregnancy-intake	no nitrosoamines-rich food consumption in pregnancy	yes nitrosoamines-rich food consumption in pregnancy	oftenVSnever-rare	yes-no	2=no	autoim	TIDM	TIDM	?16	auto	low-normal	High	Unclear-high	Low	Low	105	76	29	84	126					OR	5.96	2.76	12.84			OR	4.33	1.95	9.61	<0.0001	OR	1.78507	0.391579	1.46557	0.406753
Virtanen	2011	DIPP	prospective cohort	prospective	SPECIFIC FOOD INTAKE - MATERNAL	tea	TEA	MATERNAL TEA INTAKE	mother-pregnancy-intake	Q1 lowest	Q4 highest	HighestVSLowest	tertile-quartile-quintile	2=no	autoim	TIDM	TIDM-Ab	<10	auto	high	Low	Low	Low	Low	165															HR	0.74	0.46	1.2		HR			-0.301105	0.246646
Visalli	2003	EURODIAB Italy	CASE CONTROL	retrospective	SPECIFIC FOOD INTAKE - MATERNAL	tea	TEA	MATERNAL TEA INTAKE	mother-pregnancy-intake	No tea during pregnancy	tea during pregnancy	oftenVSnever-rare	yes-no	2=no	autoim	TIDM	TIDM	12	auto	low-normal	Unclear	Unclear-high	Low	Low	150									OR	0.66	0.4	1.08								OR	-0.415515	0.251264
Sipetic	2005	Sipetic, S.	CASE CONTROL	retrospective	SPECIFIC FOOD INTAKE - MATERNAL	tea	TEA	MATERNAL TEA INTAKE	mother-pregnancy-intake	no tea consumption in pregnancy	yes tea consumption in pregnancy	oftenVSnever-rare	yes-no	2=no	autoim	TIDM	TIDM	?16	auto	low-normal	High	Unclear-high	Low	Low	105	6	99	47	163									0.057						NS	OR	-1.55976	0.451862
Brekke	2010	ABIS	prospectvie cohort	prospective	MATERNAL INTAKE PREGNANCY/Vegetables	vegetables	ANY VEGETABLE	MATERNAL VEGETABLE INTAKE	mother-pregnancy-intake	daily	1-2 times per week	oftenVSnever-rare	freq(times/week)	1=yes	autoim	TIDM	TIDM-Ab	5	auto	low-normal	Unclear	Unclear-high	Low	Low	191									OR	1.2	0.72	1.99			OR	1.3	0.69	2.45		OR	0.182322	0.258068	0.262364	0.323328
Stene	2003	Norwegian Childhood Diabetes Study Group	case control	retrospective	Infant vitamin D supp	cod liver oil	COD LIVER OIL	INFANT FISH- FISH OIL INTAKE	infant-1st year-suppl	no	yes - >=5 times/wk	oftenVSnever-rare	yes-no	2=no	autoim	TIDM	TIDM	8.8	auto	low-normal	High	Unclear-high	Unclear	Unclear-High	545	137	318	553	834					OR	0.65	0.52	0.82		P for trend = <0.001	OR	0.74	0.56	0.99		OR	-0.430783	0.118537	-0.301105	0.148497
Strotmeyer	2004	WHO Multinational Project for Childhood Diabetes (DiaMond)	CASE CONTROL	retrospective	SPECIFIC FOOD INTAKE - CHILD	vegetables	VEGETABLES	INFANT VEGETABLE INTRODUCTION	infant-1st year-intro	>4–6 months	4TO6	5to7	categ(months)	1=yes	autoim	TIDM	TIDM	9.7	auto	low-normal	Unclear	Unclear-high	Unclear	Unclear-High	247	118.066	128.934	209.034	231.966									NOT SIG		OR	1.5	1	2.2	0.04	OR			0.405465	0.195404
Majeed	2011	Majeed, A. A.	CASE CONTROL	retrospective	SPECIFIC FOOD INTAKE - MATERNAL	coffee	COFFEE	MATERNAL COFFEE INTAKE	mother-pregnancy-intake	no maternal coffee intake in pregnancy	yes maternal coffee intake in pregnancy	oftenVSnever-rare	yes-no	2=no	autoim	TIDM	TIDM	1.5-17	auto	low-normal	Unclear	Unclear-high	Unclear	Unclear-High	96	2	92	7	292									0.205						NS	OR	-0.0977977	0.810649
Stene	2003	Norwegian Childhood Diabetes Study Group	case control	retrospective	Maternal vitamin D intake (preg., supp)	cod liver oil	COD LIVER OIL	MATERNAL FISH OIL SUPPLEMENT	mother-pregnancy-suppl	no	yes - >=5 times/wk	oftenVSnever-rare	yes-no	2=no	autoim	TIDM	TIDM	8.8	auto	low-normal	High	Unclear-high	Unclear	Unclear-High	545	60	400	237	1206					OR	0.76	0.56	1.04		P for trend = 0.07	OR	1	0.74	1.55		OR	-0.274437	0.160029	0	0.223599
Majeed	2011	Majeed, A. A.	CASE CONTROL	retrospective	SPECIFIC FOOD INTAKE - MATERNAL	tea	TEA	MATERNAL TEA INTAKE	mother-pregnancy-intake	no maternal tea intake in pregnancy	yes maternal tea intake in pregnancy	oftenVSnever-rare	yes-no	2=no	autoim	TIDM	TIDM	1.5-17	auto	low-normal	Unclear	Unclear-high	Unclear	Unclear-High	96	84	12	187	112									<0.0001		OR	4.66	1.36	16.05	<0.05	OR	1.4333	0.330929	1.53902	0.630966
Frederikson	2012	DAISY	prospectvie cohort	prospective	Specific food exposure - child	fruits	FRUIT	INFANT FRUIT INTRODUCTION	infant-1st year-intro	0-4	4.0-6	0to4	categ(months)	2=no	autoim	TIDM	TIDM	unclear	auto	high	Unclear	Unclear-high	Low	Low	49															HR	0.434783	0.2	0.943396		HR			-0.832909	0.395225
Andreasyan	2007	Tasmanian Infant Health Survey- >CARHS	prospectvie cohort	prospective	SPECIFIC FOOD INTAKE - CHILD	honey	HONEY	INFANT CONFECTIONERY INTRODUCTION	infant-1st year-intro	>1	<=1	0to4	categ(months)	1=yes	atopic	WHZ		9	5to14	low-normal	Unclear	Unclear-high	Low	Low										RR	1.2	0.65	2.21			RR	1.12	0.61	2.06		RR	0.182322	0.311567	0.113329	0.310907
Zutavern	2004	ZUTAVERN, A	prospective cohort	prospective	fruits	fruits	FRUIT	INFANT FRUIT INTRODUCTION	infant-1st year-intro	<=4	>4	0to4	categ(months)	2=no	atopic	WHZ		2	0to4	low-normal	High	Unclear-high	Low	Low						181	48.146	442	141.882					0.18	in the paper they call it prevalence at age 5.5 but based on the definition it is not for AD and transiet wheeze						OR	-0.265833	0.196666
Strassburger	2010	Strassburger, Sao Leopoldo Brazil	prospective cohort	prospective	time of introduction of fruit - FRUIT JUICE	fruit juice	FRUIT JUICE-SYRUP	INFANT FRUIT INTRODUCTION	infant-1st year-intro	>=4	<4	0to4	categ(months)	1=yes	atopic	WHZ		3.5	0to4	low-normal	Low	Low	Low	Low						53	14	285	60	OR	1.34	0.68	2.64	0.368							OR	0.29267	0.345974
Andreasyan	2007	Tasmanian Infant Health Survey- >CARHS	prospectvie cohort	prospective	SPECIFIC FOOD INTAKE - CHILD	fruit syrup	FRUIT JUICE-SYRUP	INFANT FRUIT INTRODUCTION	infant-1st year-intro	>1	<=1	0to4	categ(months)	1=yes	atopic	WHZ		9	5to14	low-normal	Unclear	Unclear-high	Low	Low										RR	1.08	0.74	1.58			RR	0.97	0.66	1.43		RR	0.076961	0.194114	-0.0304592	0.198027
Strassburger	2010	Strassburger, Sao Leopoldo Brazil	prospective cohort	prospective	TIME OF INTRODUCTION OF SALTY PUREED FOOD	salty pureed food	SALTY PUREED FOOD	INFANT VEGETABLE INTRODUCTION	infant-1st year-intro	>=4	<4	0to4	categ(months)	1=yes	atopic	WHZ		3.5	0to4	low-normal	Low	Low	Low	Low						32	10	299	62	OR	1.73	0.78	3.86	0.171		OR	1.68	0.72	3.93	0.229	OR	0.548121	0.409462	0.518794	0.433595
Zutavern	2004	ZUTAVERN, A	prospective cohort	prospective	vegetables	vegetables	VEGETABLES	INFANT VEGETABLE INTRODUCTION	infant-1st year-intro	<=4	>4	0to4	categ(months)	2=no	atopic	WHZ		2	0to4	low-normal	Low	Low	Low	Low						174	44.718	449	145.027					0.11	in the paper they call it prevalence at age 5.5 but based on the definition it is not for AD and transiet wheeze	OR	0.77	0.5	1.2		OR	-0.321601	0.200705	-0.261365	0.226371
Binkley	2011	EISL	CROSS SECTIONAL	retrospective	Specific food intake - child	industrial food		INFANT INDUSTRIAL-PROCESSED FOOD INTAKE	infant-1st year-intake	no "industrial food" intake	yes industrial food intake at least once per month	oftenVSnever-rare	yes-no	2=no	atopic	WHZ		1.4	0to4	low-normal	High	Unclear-high	Low	Low	594	497 (to any extend)	97	647 (to any extend)	168									0.09	p for a trend: never, 1/mth, 1/wk, 1/d						OR	0.285497	0.140781
Zutavern	2004	ZUTAVERN, A	prospective cohort	prospective	meat	meat		INFANT MEAT INTRODUCTION	infant-1st year-intro	<=5	>5	5to7	categ(months)	2=no	atopic	WHZ		2	0to4	low-normal	High	Unclear-high	Low	Low						256	78.08	365	109.5					0.9	in the paper they call it prevalence at age 5.5 but based on the definition it is not for AD and transiet wheeze						OR	0.0236978	0.17741
Andreasyan	2007	Tasmanian Infant Health Survey- >CARHS	prospectvie cohort	prospective	SPECIFIC FOOD INTAKE - CHILD	Non-milk fluids	ANY NON-MILK FLUID	INFANT NON-MILK FLUID INTRODUCTION	infant-1st year-intro	>1	<=1	0to4	categ(months)	2=no	atopic	WHZ		9	5to14	low-normal	Unclear	Unclear-high	Low	Low										RR	0.24	0.04	1.57			RR	0.22	0.03	1.48		RR	-1.42712	0.958261	-1.51413	0.972536
Erkkola	2012	DIPP	prospective cohort	prospective	cereals	cereal	OTHER- UNCLEAR	MATERNAL CEREAL INTAKE	mother-pregnancy-intake	155.0-246.2	246.2-772.9	HighestVSLowest	tertile-quartile-quintile	2=no	atopic	WHZ		5	5to14	low-normal	High	Unclear-high	Low	Low										OR	0.86	0.67	1.1			OR	0.87	0.66	1.13		OR	-0.150823	0.125578	-0.139262	0.133408
Erkkola	2012	DIPP	prospective cohort	prospective	chocolate	chocolate	CONFECTIONERY	MATERNAL CONFECTIONERY- SWEET DRINK INTAKE	mother-pregnancy-intake	7.14-26.7	26.7-250.4	HighestVSLowest	tertile-quartile-quintile	2=no	atopic	WHZ		5	5to14	low-normal	High	Unclear-high	Low	Low										OR	1.11	0.87	1.42			OR	1.12	0.88	1.43		OR	0.10436	0.125662	0.113329	0.124666
Miyake	2010	OMCHS	prospective cohort	prospective	any dairy product	dairy	ALL DAIRY	MATERNAL DAIRY INTAKE	mother-pregnancy-intake	Q1 lowest intake	Q4 highest intake	HighestVSLowest	tertile-quartile-quintile	2=no	atopic	WHZ		2	0to4	low-normal	Low	Low	Low	Low										OR	0.42	0.25	0.71			OR	0.45	0.25	0.79		OR	-0.867501	0.267862	-0.798508	0.287135
Erkkola	2012	DIPP	prospective cohort	prospective	milks	milk	MILK	MATERNAL DAIRY INTAKE	mother-pregnancy-intake	214.0-766.4	766.4-2756.3	HighestVSLowest	tertile-quartile-quintile	2=no	atopic	WHZ		5	5to14	low-normal	High	Unclear-high	Low	Low										OR	1	0.8	1.26			OR	0.98	0.77	1.25		OR	0	0.117914	-0.0202027	0.124156
Willers	2008	PIAMA	prospectvie cohort	prospective	Cow's milk consumption during pregnancy	milk	MILK	MATERNAL DAIRY INTAKE	mother-pregnancy-intake	Less than once a day	Daily consumption during pregnancy	oftenVSnever-rare	freq(times/week)	2=no	atopic	WHZ		8	5to14	low-normal	Unclear	Unclear-high	Low	Low										OR	0.84	0.68	1.03			OR	0.88	0.71	1.09		OR	-0.174353	0.104037	-0.127833	0.109189
Willers	2008	PIAMA	prospectvie cohort	prospective	Egg consumption during pregnancy	egg	EGG	MATERNAL EGG INTAKE	mother-pregnancy-intake	Rarely if ever consumed during pregnancy	Daily or regular intake during pregnancy	oftenVSnever-rare	freq(times/week)	2=no	atopic	WHZ		8	5to14	low-normal	Unclear	Unclear-high	Low	Low										OR	0.97	0.84	1.12			OR	0.96	0.84	1.12		OR	-0.0304592	0.0733612	-0.040822	0.0786483
Miyake	2009	OMCHS	prospective cohort	prospective	Saturated fatty acids preganancy	fat saturated	ANIMAL- DAIRY- SATURATED	MATERNAL FAT INTAKE	mother-pregnancy-intake	Q1 lowest intake	Q4 highest intake	HighestVSLowest	tertile-quartile-quintile	2=no	atopic	WHZ		2	0to4	low-normal	Low	Low	Low	Low										OR	0.57	0.35	0.92			OR	0.65	0.39	1.1		OR	-0.562119	0.244254	-0.430783	0.268415
Nwaru	2012	DIPP	prospective cohort	prospective	Specific food intake - maternal [pregnancy]	margarine	MARGARINE	MATERNAL FAT INTAKE	mother-pregnancy-intake	No Margarine consumed	Margarine Consumer	oftenVSnever-rare	yes-no	2=no	atopic	WHZ		5	5to14	low-normal	Low	Low	Low	Low										HR	1.03	0.85	1.26			HR	1.04	0.84	1.29		HR	0.0295588	0.102833	0.0392207	0.109909
Castro-Rodriguez	2010	EISL	CROSS SECTIONAL	retrospective	DIETARY FAT-FATTY ACIDS	olive oil	OMEGA 6- MUFA	MATERNAL FAT INTAKE	mother-pregnancy-intake	mothers did not use olive oil for cooking/salads/vegetables in pregnancy	mothers used olive oil for cooking/salads/vegetables in pregnancy	HighestVSLowest	yes-no	2=no	atopic	WHZ		1.4	0to4	low-normal	High	Unclear-high	Low	Low	594	468	126	694	121					OR	0.65	0.5	0.9	0.002		OR	0.57	0.4	0.8	0.002	OR	-0.430783	0.166032	-0.562119	0.172947
Leermakers	2013	GENERATION R	prospectvie cohort	prospective	Fish intake in pregnancy	fish	FISH	MATERNAL FISH- OMEGA-3- PUFA- SEAFOOD INTAKE	mother-pregnancy-intake	No fish intake in first trimester of pregnancy	Total fish >210g/week	oftenVSnever-rare	tertile-quartile-quintile	2=no	atopic	WHZ		4	0to4	low-normal	Low	Low	Low	Low																OR	0.83	0.62	1.12		OR			-0.18633	0.152887
Jedrychowski	2008	Krakow birth cohort	prospectvie cohort	prospective	MATERNAL CONSUMPTION PREGNANCY/FISH	fish	FISH	MATERNAL FISH- OMEGA-3- PUFA- SEAFOOD INTAKE	mother-pregnancy-intake	<150g/week	>150g/week	HighestVSLowest	tertile-quartile-quintile	2=no	atopic	WHZ		2	0to4	low-normal	Low	Low	Low	Low							…									Incidence risk ratio	0.966	0.948	0.985		RR	-0.0345914	0.00993766
Miyake	2009	OMCHS	prospective cohort	prospective	Fish	fish	FISH	MATERNAL FISH- OMEGA-3- PUFA- SEAFOOD INTAKE	mother-pregnancy-intake	Q1 lowest intake	Q4 highest intake	HighestVSLowest	tertile-quartile-quintile	2=no	atopic	WHZ		2	0to4	low-normal	Low	Low	Low	Low										OR	0.76	0.47	1.23			OR	0.67	0.3	1.48		OR	-0.274437	0.245638	-0.400478	0.404347
Willers	2008	PIAMA	prospectvie cohort	prospective	Fish consumption during pregnancy	fish	FISH	MATERNAL FISH- OMEGA-3- PUFA- SEAFOOD INTAKE	mother-pregnancy-intake	Rarely if ever consumed during pregnancy	Daily or regular intake during pregnancy	oftenVSnever-rare	freq(times/week)	2=no	atopic	WHZ		8	5to14	low-normal	Unclear	Unclear-high	Low	Low										OR	1.15	0.99	1.35			OR	1.1	0.94	1.29		OR	0.139762	0.0818075	0.0953102	0.0812919
Nwaru	2012	DIPP	prospective cohort	prospective	Specific food intake - maternal [pregnancy]	fat - n3 from fish	OMEGA 3- PUFA	MATERNAL FISH- OMEGA-3- PUFA- SEAFOOD INTAKE	mother-pregnancy-intake	Second/third quartile of intake	Highest quartile	HighestVSLowest	tertile-quartile-quintile	2=no	atopic	WHZ		5	5to14	low-normal	Low	Low	Low	Low										HR	0.95	0.75	1.2			HR	0.95	0.74	1.22		HR	-0.0512933	0.119191	-0.0512933	0.127625
Erkkola	2012	DIPP	prospective cohort	prospective	vegetable fruits	fruits and vegetables	ANY	MATERNAL FRUIT AND VEGETABLE INTAKE	mother-pregnancy-intake	49.5-138.7	138.7-749	HighestVSLowest	tertile-quartile-quintile	2=no	atopic	WHZ		5	5to14	low-normal	High	Unclear-high	Low	Low										OR	1.17	0.94	1.46		joint p value = 0.308	OR	1.09	0.86	1.38		OR	0.157004	0.112976	0.0861777	0.12036
Erkkola	2012	DIPP	prospective cohort	prospective	fruits	fruits	ANY FRUIT	MATERNAL FRUIT INTAKE	mother-pregnancy-intake	326.2-793.9	>793.9-3908	HighestVSLowest	tertile-quartile-quintile	2=no	atopic	WHZ		5	5to14	low-normal	High	Unclear-high	Low	Low										OR	1.11	0.88	1.4		joint p value = 0.268	OR	1.07	0.83	1.37		OR	0.10436	0.118425	0.0676586	0.126098
Miyake	2010	OMCHS	prospective cohort	prospective	Maternal intake of total fruit	fruits	ANY FRUIT	MATERNAL FRUIT INTAKE	mother-pregnancy-intake	Q1 lowest intake	Q4 highest intake	HighestVSLowest	tertile-quartile-quintile	2=no	atopic	WHZ		2	0to4	low-normal	Low	Low	Low	Low										OR	1.2	0.73	1.96			OR	1.51	0.9	2.57		OR	0.182322	0.250318	0.41211	0.271325
Willers	2008	PIAMA	prospectvie cohort	prospective	Fruit consumption during pregnancy	fruits	ANY FRUIT	MATERNAL FRUIT INTAKE	mother-pregnancy-intake	Less than once a day	Daily consumption during pregnancy	oftenVSnever-rare	freq(times/week)	2=no	atopic	WHZ		8	5to14	low-normal	Unclear	Unclear-high	Low	Low										OR	0.82	0.7	0.96			OR	0.89	0.75	1.04		OR	-0.198451	0.0804229	-0.116534	0.0794666
Willers	2007	ABERDEEN COHORT	prospectvie cohort	prospective	SPECIFIC FOOD INTAKE - MATERNAL	apples	APPLE	MATERNAL FRUIT INTAKE	mother-pregnancy-intake	0-1/week	?4/week	oftenVSnever-rare	freq(times/week)	2=no	atopic	WHZ		5	5to14	low-normal	Low	Low	Low	Low										OR	0.59	0.4	0.88	0.009		OR	0.63	0.42	0.95	0.029	OR	-0.527633	0.203979	-0.462035	0.209562
Erkkola	2012	DIPP	prospective cohort	prospective	meat	meat		MATERNAL MEAT INTAKE	mother-pregnancy-intake	119.2-197.7	197.7-764.7	HighestVSLowest	tertile-quartile-quintile	2=no	atopic	WHZ		5	5to14	low-normal	High	Unclear-high	Low	Low										OR	1.22	0.97	1.55			OR	1.23	0.96	1.58		OR	0.198851	0.122145	0.207014	0.127761
Miyake	2009	OMCHS	prospective cohort	prospective	meat	meat		MATERNAL MEAT INTAKE	mother-pregnancy-intake	Q1 lowest intake	Q4 highest intake	HighestVSLowest	tertile-quartile-quintile	2=no	atopic	WHZ		2	0to4	low-normal	Low	Low	Low	Low										OR	0.73	0.46	1.16			OR	0.77	0.47	1.27		OR	-0.314711	0.236291	-0.261365	0.255297
Erkkola	2012	DIPP	prospective cohort	prospective	fermented milk products	fermented milk products	FERMENTED MILK	MATERNAL PROBIOTIC	mother-pregnancy-intake	100.0-309.6	309.6-3326.8	HighestVSLowest	tertile-quartile-quintile	2=no	atopic	WHZ		5	5to14	low-normal	High	Unclear-high	Low	Low										OR	0.82	0.66	1.03			OR	0.81	0.64	1.03		OR	-0.198451	0.116332	-0.210721	0.122592
Miyake	2010	OMCHS	prospective cohort	prospective	yoghurt	yoghurt	PROBIOTIC	MATERNAL PROBIOTIC	mother-pregnancy-intake	Q1 lowest intake	Q4 highest intake	HighestVSLowest	tertile-quartile-quintile	2=no	atopic	WHZ		2	0to4	low-normal	Low	Low	Low	Low										OR	1.03	0.62	1.69			OR	1.26	0.74	2.16		OR	0.0295588	0.252638	0.231112	0.274998
Erkkola	2012	DIPP	prospective cohort	prospective	total vegetables	vegetables	ANY VEGETABLE	MATERNAL VEGETABLE INTAKE	mother-pregnancy-intake	149.1-315.1 g/d	315.1-2532.2	HighestVSLowest	tertile-quartile-quintile	2=no	atopic	WHZ		5	5to14	low-normal	High	Unclear-high	Low	Low										OR	1.12	0.88	1.42		joint p value = 0.035	OR	1.14	0.9	1.45		OR	0.113329	0.121086	0.131028	0.122722
Miyake	2010	OMCHS	prospective cohort	prospective	Maternal intake of vegetables	vegetables	ANY VEGETABLE	MATERNAL VEGETABLE INTAKE	mother-pregnancy-intake	Q1 lowest intake	Q4 highest intake	HighestVSLowest	tertile-quartile-quintile	2=no	atopic	WHZ		2	0to4	low-normal	Low	Low	Low	Low										OR	0.74	0.45	1.19			OR	0.69	0.41	1.15		OR	-0.301105	0.242377	-0.371064	0.260625
Willers	2008	PIAMA	prospectvie cohort	prospective	Vegetable consumption during pregnancy	vegetables	ANY VEGETABLE	MATERNAL VEGETABLE INTAKE	mother-pregnancy-intake	Less than once a day	Daily consumption during pregnancy	oftenVSnever-rare	freq(times/week)	2=no	atopic	WHZ		8	5to14	low-normal	Unclear	Unclear-high	Low	Low										OR	0.97	0.85	1.12			OR	0.97	0.83	1.12		OR	-0.0304592	0.0733612	-0.0304592	0.0733612
Maslova	2012	DANISH BIRTH COHORT	prospective cohort	prospective	PEANUT AND PISTACHIO intake during pregnancy	peanut and pistachio	NUTS	MATERNAL VEGETABLE INTAKE	mother-pregnancy-intake	0	2TO3	oftenVSnever-rare	freq(times/week)	2=no	atopic	WHZ		1.5	0to4	low-normal	Low	Low	Low	Low										OR	0.95	0.89	1.01			OR	0.99	0.92	1.06		OR	-0.0512933	0.0312467	-0.0100503	0.0348568
Kull	2006	BAMSE	prospective cohort	prospective	FISH	fish	any fish	INFANT FISH- FISH OIL INTAKE	infant-1st year-intake	<=1 time/mo	> =2-3 time/mo	oftenVSnever-rare	freq(times/week)	2=no	atopic	WHZ.REC		4	0to4	low-normal	Low	Low	Low	Low						2883	178	712	69							OR	0.68	0.51	0.92		OR	-0.489035	0.148444	-0.385662	0.154225
Magnussonm	2013	BAMSE	prospective cohort	prospective	FISH	fish	any fish	INFANT FISH- FISH OIL INTAKE	infant-1st year-intake	<=1 time/mo	> =2-3 time/mo	oftenVSnever-rare	freq(times/week)	2=no	atopic	WHZ.REC		12	5to14	low-normal	Low	Low	Low	Low																OR	0.85	0.61	1.19		OR			-0.162519	0.17167
Oien	2009	PACT	prospective cohort	prospective	Fatty acid	fish	any fish	INFANT FISH- FISH OIL INTAKE	infant-1st year-intake	Never	?1x/week	oftenVSnever-rare	freq(times/week)	2=no	atopic	WHZ.REC		2	0to4	low-normal	Low	Low	Low	Low										OR	0.81	0.6	1.09	0.16							OR	-0.210721	0.151479
Zutavern	2004	ZUTAVERN, A	prospective cohort	prospective	fruits	fruits	FRUIT	INFANT FRUIT INTRODUCTION	infant-1st year-intro	<=4	>4	0to4	categ(months)	2=no	atopic	WHZ.REC		5.5	5to14	low-normal	High	Unclear-high	Low	Low						181	36.2	442	81.77					0.68	in the paper they call it prevalence at age 5.5 but based on the definition it is not for AD and transiet wheeze						OR	0.0965379	0.222566
Strassburger	2010	Strassburger, Sao Leopoldo Brazil	prospective cohort	prospective	time of introduction of fruit - FRUIT JUICE	fruit juice	FRUIT JUICE-SYRUP	INFANT FRUIT INTRODUCTION	infant-1st year-intro	>=4	<4	0to4	categ(months)	1=yes	atopic	WHZ.REC		3.5	0to4	low-normal	Low	Low	Low	Low						53	4	285	15	OR	1.46	0.46	4.61	0.507							OR	0.378436	0.586628
Strassburger	2010	Strassburger, Sao Leopoldo Brazil	prospective cohort	prospective	TIME OF INTRODUCTION OF SALTY PUREED FOOD	salty pureed food	SALTY PUREED FOOD	INFANT VEGETABLE INTRODUCTION	infant-1st year-intro	>=4	<4	0to4	categ(months)	1=yes	atopic	WHZ.REC		3.5	0to4	low-normal	Low	Low	Low	Low						32	4	299	15	OR	2.7	0.84	8.7	0.084		OR	2.24	0.62	8.1	0.216	OR	0.993252	0.596975	0.806476	0.65581
Zutavern	2004	ZUTAVERN, A	prospective cohort	prospective	vegetables	vegetables	VEGETABLES	INFANT VEGETABLE INTRODUCTION	infant-1st year-intro	<=4	>4	0to4	categ(months)	2=no	atopic	WHZ.REC		5.5	5to14	low-normal	Low	Low	Low	Low						174	36.018	449	82.167					0.5	in the paper they call it prevalence at age 5.5 but based on the definition it is not for AD and transiet wheeze	OR	1.2	0.7	2		OR	0.153049	0.2234	0.182322	0.260625
Dela Bianca	2012	Dela Bianca	CROSS SECTIONAL	retrospective	SPECIFIC FOOd intake -CHILD	PROCESSED FOOD		INFANT INDUSTRIAL-PROCESSED FOOD INTAKE	infant-1st year-intake	NO	YES	oftenVSnever-rare	yes-no	2=no	atopic	WHZ.REC		1	0to4	low-normal	Unclear	Unclear-high	Low	Low	467									OR	1.68	1.1	2.5			OR					OR	0.518794	0.202805
Whu	2007	Whu, R., BRONX, NY	CASE CONTROL	retrospective	SPECIFIC FOOD INTAKE - CHILD	industrial food		INFANT INDUSTRIAL-PROCESSED FOOD INTAKE	infant-1st year-intake	yes junk food intake <1yr	no junk food intake <1yr	oftenVSnever-rare	yes-no	1=yes	atopic	WHZ.REC		4	0to4	low-normal	High	Unclear-high	Low	Low	101	83	18	79	81																OR	1.55347	0.304315
Zutavern	2004	ZUTAVERN, A	prospective cohort	prospective	meat	meat		INFANT MEAT INTRODUCTION	infant-1st year-intro	<=5	>5	5to7	categ(months)	2=no	atopic	WHZ.REC		5.5	5to14	low-normal	High	Unclear-high	Low	Low						256	47.616	365	70.445					0.83	in the paper they call it prevalence at age 5.5 but based on the definition it is not for AD and transiet wheeze						OR	-0.0455802	0.208304
Oien	2009	PACT	prospective cohort	prospective	Fatty acid	vegetables	VEGETABLES	INFANT VEGETABLE INTAKE	infant-1st year-intake	?1x/week	Almost daily	oftenVSnever-rare	freq(times/week)	2=no	atopic	WHZ.REC		2	0to4	low-normal	Low	Low	Low	Low										OR	0.96	0.67	1.38								OR	-0.040822	0.185156
Oliveti	1995	Oliveti, J. F.	case control	retrospective	SPECIFIC FOOd intake -MOTHER	alcohol		MATERNAL ALCOHOL INTAKE	mother-pregnancy-intake	no	yes	oftenVSnever-rare	yes-no	2=no	atopic	WHZ.REC		2017-09-04	5to14	low-normal	Unclear	Unclear-high	Low	Low	131	15.589	115.411	7.336	123.664					OR						OR					OR	0.82284	0.466061
Erkkola	2012	DIPP	prospective cohort	prospective	cereals	cereal	OTHER- UNCLEAR	MATERNAL CEREAL INTAKE	mother-pregnancy-intake	155.0-246.2	246.2-772.9	HighestVSLowest	tertile-quartile-quintile	2=no	atopic	WHZ.REC		5	5to14	low-normal	High	Unclear-high	Low	Low										HR	0.91	0.59	1.39			HR	0.86	0.52	1.42		HR	-0.0943107	0.21613	-0.150823	0.255857
Erkkola	2012	DIPP	prospective cohort	prospective	chocolate	chocolate	CONFECTIONERY	MATERNAL CONFECTIONERY- SWEET DRINK INTAKE	mother-pregnancy-intake	7.14-26.7	26.7-250.4	HighestVSLowest	tertile-quartile-quintile	2=no	atopic	WHZ.REC		5	5to14	low-normal	High	Unclear-high	Low	Low										HR	0.99	0.6	1.65			HR	1.09	0.66	1.81		HR	-0.0100503	0.260625	0.0861777	0.25875
Maslova	2013	DANISH BIRTH COHORT	prospective cohort	prospective	artificially-swetened non-corbonated soft drinks consumption during pregnancy	artificially-swetened non-corbonated soft drinks	SWEET DRINK	MATERNAL CONFECTIONERY- SWEET DRINK INTAKE	mother-pregnancy-intake	0	>= 1 /DAY	oftenVSnever-rare	freq(times/week)	2=no	atopic	WHZ.REC		1.5	0to4	low-normal	Low	Low	Low	Low										OR	1.38	1.28	1.48			OR	1.23	1.13	1.33		OR	0.322083	0.0356932	0.207014	0.03988
Maslova	2013	DANISH BIRTH COHORT	prospective cohort	prospective	artificially-swetened non-corbonated soft drinks consumption during pregnancy	artificially-swetened non-corbonated soft drinks	SWEET DRINK	MATERNAL CONFECTIONERY- SWEET DRINK INTAKE	mother-pregnancy-intake	0	>= 1 /DAY	oftenVSnever-rare	freq(times/week)	2=no	atopic	WHZ.REC		7	5to14	low-normal	Low	Low	Low	Low										OR	1.22	1.08	1.38			OR	1.14	0.98	1.34		OR	0.198851	0.0628738	0.131028	0.0824701
Lumia	2011	DIPP	prospectvie cohort	prospective	SPECIFIC FOOD INTAKE - MATERNAL	dairy	ALL DAIRY	MATERNAL DAIRY INTAKE	mother-pregnancy-intake	mid-half of intake	highest quartile of intake during pregnancy	HighestVSLowest	tertile-quartile-quintile	2=no	atopic	WHZ.REC		5	5to14	low-normal	Low	Low	Low	Low										HR	0.7	0.45	1.09	0.069		HR	0.73	0.44	1.21	0.282	HR	-0.356675	0.225945	-0.314711	0.257822
Willers	2008	PIAMA	prospectvie cohort	prospective	Cow's milk consumption during pregnancy	milk	MILK	MATERNAL DAIRY INTAKE	mother-pregnancy-intake	Less than once a day	Daily consumption during pregnancy	oftenVSnever-rare	freq(times/week)	2=no	atopic	WHZ.REC		8	5to14	low-normal	Unclear	Unclear-high	Low	Low										OR	0.89	0.72	1.1			OR	0.92	0.74	1.15		OR	-0.116534	0.108084	-0.0833816	0.113849
Willers	2008	PIAMA	prospectvie cohort	prospective	Egg consumption during pregnancy	egg	EGG	MATERNAL EGG INTAKE	mother-pregnancy-intake	Rarely if ever consumed during pregnancy	Daily or regular intake during pregnancy	oftenVSnever-rare	freq(times/week)	2=no	atopic	WHZ.REC		8	5to14	low-normal	Unclear	Unclear-high	Low	Low										OR	1.02	0.87	1.19			OR	1.03	0.88	1.2		OR	0.0198026	0.0786483	0.0295588	0.0779402
Lumia	2011	DIPP	prospectvie cohort	prospective	SPECIFIC FOOD INTAKE - MATERNAL	margarine	MARGARINE	MATERNAL FAT INTAKE	mother-pregnancy-intake	No Margarine during pregnancy	Margarine user during pregnancy	oftenVSnever-rare	yes-no	2=no	atopic	WHZ.REC		5	5to14	low-normal	Low	Low	Low	Low										HR	0.76	0.55	1.04	0.084		HR	0.82	0.58	1.17	0.274	HR	-0.274437	0.160029	-0.198451	0.181354
Fitzsimon	2007	LIFE-WAYS COHORT	prospective cohort	prospective	ADDED -SPREADED FAT	fat from spreads	OTHER- UNCLEAR	MATERNAL FAT INTAKE	mother-pregnancy-intake	Q1	Q4	HighestVSLowest	tertile-quartile-quintile	2=no	atopic	WHZ.REC		3	0to4	low-normal	Low	Low	Low	Low										OR	1.5	0.81	2.8			OR	0.68	0.29	1.6		OR	0.405465	0.318446	-0.385662	0.436564
Oien	2009	PACT	prospective cohort	prospective	Fatty acid	cod liver oil	COD LIVER OIL	MATERNAL FISH OIL SUPPLEMENT	mother-pregnancy-suppl	Never	?4	oftenVSnever-rare	freq(times/week)	2=no	atopic	WHZ.REC		2	0to4	low-normal	Low	Low	Low	Low										OR	0.97	0.69	1.37	0.85							OR	-0.0304592	0.176158
Salam	2005	Children's Health Study	case control	retrospective	SPECIFIC FOOD INTAKE - MATERNAL	fish	FISH	MATERNAL FISH- OMEGA-3- PUFA- SEAFOOD INTAKE	mother-pregnancy-intake	never	At least Monthly ie 0.25 times per week	oftenVSnever-rare	freq(times/week)	2=no	atopic	WHZ.REC		2016-09-01	5to14	low-normal	Unclear	Unclear-high	Low	Low	279															OR	0.8	0.47	1.36		OR			-0.223144	0.270729
Chatzi	2008	Menorca birth cohort	prospective cohort	prospective	Fish	fish	FISH	MATERNAL FISH- OMEGA-3- PUFA- SEAFOOD INTAKE	mother-pregnancy-intake	<=2.5	<=2.5	oftenVSnever-rare	freq(times/week)	2=no	atopic	WHZ.REC		6.5	5to14	low-normal	Low	Low	Low	Low																OR	0.34	0.13	0.84		OR			-1.07881	0.461457
Oien	2009	PACT	prospective cohort	prospective	Fatty acid	fish	FISH	MATERNAL FISH- OMEGA-3- PUFA- SEAFOOD INTAKE	mother-pregnancy-intake	Never	?1x/week	oftenVSnever-rare	freq(times/week)	2=no	atopic	WHZ.REC		2	0to4	low-normal	Low	Low	Low	Low										OR	0.99	0.72	1.37	0.96							OR	-0.0100503	0.165745
Willers	2008	PIAMA	prospectvie cohort	prospective	Fish consumption during pregnancy	fish	FISH	MATERNAL FISH- OMEGA-3- PUFA- SEAFOOD INTAKE	mother-pregnancy-intake	Rarely if ever consumed during pregnancy	Daily or regular intake during pregnancy	oftenVSnever-rare	freq(times/week)	2=no	atopic	WHZ.REC		8	5to14	low-normal	Unclear	Unclear-high	Low	Low										OR	1.03	0.88	1.23			OR	1.01	0.85	1.2		OR	0.0295588	0.0905385	0.00995033	0.0879445
Lumia	2011	DIPP	prospectvie cohort	prospective	SPECIFIC FOOD INTAKE - MATERNAL	fat - n3	OMEGA 3- PUFA	MATERNAL FISH- OMEGA-3- PUFA- SEAFOOD INTAKE	mother-pregnancy-intake	mid-half of intake	highest quartile of intake during pregnancy	HighestVSLowest	tertile-quartile-quintile	2=no	atopic	WHZ.REC		5	5to14	low-normal	Low	Low	Low	Low										HR	1.19	0.81	1.77	0.018		HR	1.09	0.7	1.7	0.036	HR	0.173953	0.202564	0.0861777	0.22676
Erkkola	2012	DIPP	prospective cohort	prospective	vegetable fruits	fruits and vegetables	ANY	MATERNAL FRUIT AND VEGETABLE INTAKE	mother-pregnancy-intake	49.5-138.7	138.7-749	HighestVSLowest	tertile-quartile-quintile	2=no	atopic	WHZ.REC		5	5to14	low-normal	High	Unclear-high	Low	Low										HR	0.78	0.52	1.16		joint p value = 0.469	HR	0.75	0.56	1.22		HR	-0.248461	0.20249	-0.287682	0.248231
Fitzsimon	2007	LIFE-WAYS COHORT	prospective cohort	prospective	fruits and vegetables	fruits and vegetables	ANY	MATERNAL FRUIT AND VEGETABLE INTAKE	mother-pregnancy-intake	Q1	Q4	HighestVSLowest	tertile-quartile-quintile	2=no	atopic	WHZ.REC		3	0to4	low-normal	Low	Low	Low	Low										OR	0.49	0.22	1.1			OR	0.42	0.18	0.99		OR	-0.71335	0.412582	-0.867501	0.437475
Erkkola	2012	DIPP	prospective cohort	prospective	fruits	fruits	ANY FRUIT	MATERNAL FRUIT INTAKE	mother-pregnancy-intake	326.2-793.9	>793.9-3908	HighestVSLowest	tertile-quartile-quintile	2=no	atopic	WHZ.REC		5	5to14	low-normal	High	Unclear-high	Low	Low										HR	1.02	0.67	1.55		joint p value = 0.714	HR	0.97	0.6	1.58		HR	0.0198026	0.213496	-0.0304592	0.24892
Willers	2008	PIAMA	prospectvie cohort	prospective	Fruit consumption during pregnancy	fruits	ANY FRUIT	MATERNAL FRUIT INTAKE	mother-pregnancy-intake	Less than once a day	Daily consumption during pregnancy	oftenVSnever-rare	freq(times/week)	2=no	atopic	WHZ.REC		8	5to14	low-normal	Unclear	Unclear-high	Low	Low										OR	0.87	0.73	1.04			OR	0.91	0.77	1.09		OR	-0.139262	0.0910626	-0.0943107	0.0920859
Willers	2007	ABERDEEN COHORT	prospectvie cohort	prospective	SPECIFIC FOOD INTAKE - MATERNAL	apples	APPLE	MATERNAL FRUIT INTAKE	mother-pregnancy-intake	0-1/week	?4/week	oftenVSnever-rare	freq(times/week)	2=no	atopic	WHZ.REC		5	5to14	low-normal	Low	Low	Low	Low										OR	0.46	0.27	0.78	0.005		OR	0.47	0.27	0.82	0.008	OR	-0.776529	0.269422	-0.755023	0.283965
Erkkola	2012	DIPP	prospective cohort	prospective	meat	meat		MATERNAL MEAT INTAKE	mother-pregnancy-intake	119.2-197.7	197.7-764.7	HighestVSLowest	tertile-quartile-quintile	2=no	atopic	WHZ.REC		5	5to14	low-normal	High	Unclear-high	Low	Low										HR	0.84	0.55	1.27			HR	0.79	0.48	1.32		HR	-0.174353	0.210903	-0.235722	0.261915
Erkkola	2012	DIPP	prospective cohort	prospective	fermented milk products	fermented milk products	FERMENTED MILK	MATERNAL PROBIOTIC	mother-pregnancy-intake	100.0-309.6	309.6-3326.8	HighestVSLowest	tertile-quartile-quintile	2=no	atopic	WHZ.REC		5	5to14	low-normal	High	Unclear-high	Low	Low										HR	1.09	0.69	1.71			HR	1.38	0.81	2.36		HR	0.0861777	0.229753	0.322083	0.273764
Erkkola	2012	DIPP	prospective cohort	prospective	total vegetables	vegetables	ANY VEGETABLE	MATERNAL VEGETABLE INTAKE	mother-pregnancy-intake	149.1-315.1 g/d	315.1-2532.2	HighestVSLowest	tertile-quartile-quintile	2=no	atopic	WHZ.REC		5	5to14	low-normal	High	Unclear-high	Low	Low										HR	0.78	0.47	1.29		joint p value = 0.616	HR	0.75	0.46	1.22		HR	-0.248461	0.256685	-0.287682	0.248231
Chatzi	2008	Menorca birth cohort	prospective cohort	prospective	Vegetables	vegetables	ANY VEGETABLE	MATERNAL VEGETABLE INTAKE	mother-pregnancy-intake	<=8	>8	oftenVSnever-rare	freq(times/week)	2=no	atopic	WHZ.REC		6.5	5to14	low-normal	Low	Low	Low	Low																OR	0.36	0.14	0.92		OR			-1.02165	0.478709
Oien	2009	PACT	prospective cohort	prospective	Fatty acid	vegetables	ANY VEGETABLE	MATERNAL VEGETABLE INTAKE	mother-pregnancy-intake	?1x/week	2 to 5 times	oftenVSnever-rare	freq(times/week)	2=no	atopic	WHZ.REC		2	0to4	low-normal	Low	Low	Low	Low										OR	0.98	0.56	1.69								OR	-0.0202027	0.278026
Willers	2008	PIAMA	prospectvie cohort	prospective	Vegetable consumption during pregnancy	vegetables	ANY VEGETABLE	MATERNAL VEGETABLE INTAKE	mother-pregnancy-intake	Less than once a day	Daily consumption during pregnancy	oftenVSnever-rare	freq(times/week)	2=no	atopic	WHZ.REC		8	5to14	low-normal	Unclear	Unclear-high	Low	Low										OR	0.98	0.85	1.13			OR	0.98	0.84	1.14		OR	-0.0202027	0.0726634	-0.0202027	0.0771587
Maslova	2012	DANISH BIRTH COHORT	prospective cohort	prospective	PEANUT AND PISTACHIO intake during pregnancy	peanut and pistachio	NUTS	MATERNAL VEGETABLE INTAKE	mother-pregnancy-intake	0	2TO3	oftenVSnever-rare	freq(times/week)	2=no	atopic	WHZ.REC		1.5	0to4	low-normal	Low	Low	Low	Low										OR	0.95	0.86	1.04			OR	1.04	0.93	1.17		OR	-0.0512933	0.0461806	0.0392207	0.0600934
Maslova	2012	DANISH BIRTH COHORT	prospective cohort	prospective	TREE NUTS intake during pregnancy	nuts (tree nuts)	NUTS	MATERNAL VEGETABLE INTAKE	mother-pregnancy-intake	0	2TO3	oftenVSnever-rare	freq(times/week)	2=no	atopic	WHZ.REC		7	5to14	low-normal	Low	Low	Low	Low										OR	0.86	0.76	0.97			OR	0.95	0.81	1.11		OR	-0.150823	0.06141	-0.0512933	0.079415
Marini	1996	Marini	prospective cohort (of RCT-CCT)	prospective	CITRUS FRUIT	citrus fruits	FRUIT	INFANT FRUIT INTRODUCTION	infant-1st year-intro	>=4	<4	0to4	categ(months)	1=yes	atopic	WHZ.REC		3	0to4	high	Unclear	Unclear-high	Unclear	Unclear-High																OR	0.6	0.2	1.2		OR			-0.510826	0.353647
Marini	1996	Marini	prospective cohort (of RCT-CCT)	prospective	BEEF	meat		INFANT MEAT INTRODUCTION	infant-1st year-intro	>=6	<6	5to7	categ(months)	1=yes	atopic	WHZ.REC		3	0to4	high	Unclear	Unclear-high	Unclear	Unclear-High																OR	0.7	0.2	1.2		OR			-0.356675	0.274998
Kull	2006	BAMSE	prospective cohort	prospective	FISH	fish	any fish	INFANT FISH- FISH OIL INTAKE	infant-1st year-intake	<=1 time/mo	> =2-3 time/mo	oftenVSnever-rare	freq(times/week)	2=no	atopic	WHZ.RECat		4	0to4	high	Low	Low	Low	Low						324	27	82	6							OR	1.17	0.46	2.96		OR	0.141079	0.469285	0.157004	0.473564
Miyake	2010	OMCHS	Prospective cohort	prospective	Maternal vitamin D intake (preg.)	VIT D	VITAMIN D	MATERNAL VITAMIN INTAKE	mother-pregnancy-intake	Quartile 1 (3.5)	Quartile 4 (9.1)	HighestVSLowest	tertile-quartile-quintile	2=no	atopic	AD		2	0to4	low/normal	Low	Low	Low	Low							36		46	OR	0.73	0.44	1.19		P for trend = 0.18	OR	0.67	0.39	1.13		OR	-0.314711	0.249318	-0.400478	0.266681
Gale	2008	Gale, CR.	Prospective cohort	prospective	Maternal plasma 25(OH)D3 (preg.)	VIT D plasma	MATERNAL PLASMA VITAMIN D	MATERNAL PLASMA VITAMIN D	mother-pregnancy-blood	Quartile 1 (<30 nmol/l)	Quartile 4 (>75 nmol/l(	HighestVSLowest	tertile-quartile-quintile	2=no	atopic	AD		9	5to14	low/normal	Unclear	Unclear/high	Low	Low										OR	1.89	0.51	6.99								OR	0.636577	0.667298
Carmargo	2007	PROJECT VIVA	Prospective cohort	prospective	Maternal vitamin D intake (preg.)	VIT D	VITAMIN D	MATERNAL VITAMIN INTAKE	mother-pregnancy-intake	Quartile 1 (356, 60-445 IU)	Quartile 4 (724, 659-1145)	HighestVSLowest	tertile-quartile-quintile	2=no	atopic	AD		3	0to4	low/normal	Low	Low	Low	Low										OR	1.1	0.79	1.53		P for trend = 0.58	OR	0.95	0.65	1.39		OR	0.0953102	0.168346	-0.0512933	0.194182
Erkkola	2009	DIPP	prospective cohort	prospective	Maternal vitamin D intake (preg. FOOD)	VIT D	VITAMIN D	MATERNAL VITAMIN INTAKE	mother-pregnancy-intake	2nd & 3rd Quartiles (0.31-0.54 microg/MJ)	4th Quartile (>0.54 microg/MJ)	HighestVSLowest	tertile-quartile-quintile	2=no	atopic	AD		5	5to14	low/normal	Low	Low	Low	Low																OR	0.92	0.71	1.2		OR			-0.0833816	0.135563
West	2012	WEST, CE	prospective cohort	prospective	zinc	ZINC	ZINC	MATERNAL MINERAL INTAKE	mother-pregnancy-intake	Q1 - lowest	Q4 - highest	HighestVSLowest	tertile-quartile-quintile	2=no	atopic	AD		1	0to4	high	High	Unclear/high	Low	Low										OR	1.64	0.85	3.18			OR	1.73	0.8	3.73		OR	0.494696	0.337849	0.548121	0.391983
Miyake	2010	OMCHS	prospective cohort	prospective	Maternal intake of zinc	ZINC	ZINC	MATERNAL MINERAL INTAKE	mother-pregnancy-intake	Q1 lowest intake	Q4 highest intake	HighestVSLowest	tertile-quartile-quintile	2=no	atopic	AD		2	0to4	low/normal	Low	Low	Low	Low										OR	1.3	0.78	2.18			OR	1.43	0.82	2.52		OR	0.262364	0.263755	0.357674	0.289074
Devereux	2006	ABERDEEN COHORT	prospectvie cohort	prospective	Zinc intake during pregnancy	ZINC	ZINC	MATERNAL MINERAL INTAKE	mother-pregnancy-intake	lowest (Q1)	Highest (Q5)	HighestVSLowest	tertile-quartile-quintile	2=no	atopic	AD		5	5to14	low/normal	Low	Low	Low	Low										OR	0.73	0.5	1.08			OR	0.63	0.4	0.95		OR	-0.314711	0.199833	-0.462035	0.209562
Allen	2013	HealthNUTS	NESTED CASE CONTROL	prospective	SPECIFIC NUTRIENT EXPOSURES - MOTHER OR CHILD	VIT D plasma	INFANT VITAMIN D level	INFANT VITAMIN D level	infant-1st year-blood	25(OH)D3 >50 nmol/L	25(OH)D3 <=50 nmol/L	HighestVSLowest	tertile-quartile-quintile	1=yes	atopic	AD		1	0to4	low/normal	Low	Low	Low	Low	174	NR (check online supplement)		NR (check online supplement)						OR	0.98	0.58	1.64			OR	1.34	0.37	4.79		OR	-0.0202027	0.262704	0.29267	0.649929
Jones	2012	Jones, PA.	Retrospective cohort	retrospective	CB 25(OH)D3	VIT D cord blood	INFANT VITAMIN D level	INFANT VITAMIN D level	infant-1st year-blood	>=75 nmol/L	<50 nmol/L	HighestVSLowest	tertile-quartile-quintile	1=yes	atopic	AD		1	0to4	high	Unclear	Unclear/high	Low	Low										OR	2.66	1.24	5.72	0.012							OR	0.978326	0.390634
Weisse	2012	LINA cohort study	Prospective cohort	prospective	CB 25(OH)D3	VIT D cord blood	INFANT VITAMIN D level	INFANT VITAMIN D level	infant-1st year-blood		unclear if cont or quartiles	HighestVSLowest	tertile-quartile-quintile	2=no	atopic	AD		2	0to4	low/normal	High	Unclear/high	Low	Low										OR	1.09	0.8	1.48	0.606		OR	1.2	0.81	1.76	0.365	OR	0.0861777	0.156053	0.182322	0.195404
Miyake	2010	OMCHS	prospective cohort	prospective	Maternal intake of Vitamin E	VIT E	VITAMIN E	MATERNAL VITAMIN INTAKE	mother-pregnancy-intake	Q1 lowest intake	Q4 highest intake	HighestVSLowest	tertile-quartile-quintile	2=no	atopic	AD		2	0to4	low/normal	Low	Low	Low	Low										OR	0.6	0.36	0.999			OR	0.59	0.34	1.02		OR	-0.510826	0.260115	-0.527633	0.279304
West	2012	WEST, CE	prospective cohort	prospective	Vitamin E	VIT E	VITAMIN E	MATERNAL VITAMIN INTAKE	mother-pregnancy-intake	Q1 - lowest	Q4 - highest	HighestVSLowest	tertile-quartile-quintile	2=no	atopic	AD		1	0to4	high	High	Unclear/high	Low	Low										OR	1.18	0.61	2.28			OR	1.42	0.68	2.98		OR	0.165514	0.336052	0.350657	0.378197
Martindale	2005	ABERDEEN COHORT	prospective cohort	prospective	Vitamin E-dietary	VIT E	VITAMIN E	MATERNAL VITAMIN INTAKE	mother-pregnancy-intake	lowest	highest	HighestVSLowest	tertile-quartile-quintile	2=no	atopic	AD		2	0to4	low/normal	Low	Low	Low	Low										OR	0.76	0.52	1.13			OR	0.72	0.47	1.09		OR	-0.274437	0.202375	-0.328504	0.211572
Miyake	2010	OMCHS	prospective cohort	prospective	Maternal intake of b-carotene	B-CAROTENE	VITAMIN A	MATERNAL VITAMIN INTAKE	mother-pregnancy-intake	Q1 lowest intake	Q4 highest intake	HighestVSLowest	tertile-quartile-quintile	2=no	atopic	AD		2	0to4	low/normal	Low	Low	Low	Low										OR	0.63	0.38	1.04			OR	0.52	0.3	0.89		OR	-0.462035	0.255743	-0.653926	0.27418
West	2012	WEST, CE	prospective cohort	prospective	b-carotene intake	B-CAROTENE	VITAMIN A	MATERNAL VITAMIN INTAKE	mother-pregnancy-intake	Q1 - lowest	Q4 - highest	HighestVSLowest	tertile-quartile-quintile	2=no	atopic	AD		1	0to4	high	High	Unclear/high	Low	Low										OR	0.85	0.44	1.66			OR	0.67	0.31	1.43		OR	-0.162519	0.341498	-0.400478	0.386812
Martindale	2005	ABERDEEN COHORT	prospective cohort	prospective	Vitamin C-total	VIT C	VITAMIN C	MATERNAL VITAMIN INTAKE	mother-pregnancy-intake	lowest	highest	HighestVSLowest	tertile-quartile-quintile	2=no	atopic	AD		2	0to4	low/normal	Low	Low	Low	Low										OR	1.52	1.02	2.27	0.044		OR	1.56	0.99	2.45	0.048	OR	0.41871	0.204627	0.444686	0.230307
Miyake	2010	OMCHS	prospective cohort	prospective	Maternal intake of Vitamin C	VIT C	VITAMIN C	MATERNAL VITAMIN INTAKE	mother-pregnancy-intake	Q1 lowest intake	Q4 highest intake	HighestVSLowest	tertile-quartile-quintile	2=no	atopic	AD		2	0to4	low/normal	Low	Low	Low	Low										OR	0.62	0.36	1.05			OR	0.67	0.37	1.18		OR	-0.478036	0.268789	-0.400478	0.288771
West	2012	WEST, CE	prospective cohort	prospective	VitaminC intake	VIT C	VITAMIN C	MATERNAL VITAMIN INTAKE	mother-pregnancy-intake	Q1 - lowest	Q4 - highest	HighestVSLowest	tertile-quartile-quintile	2=no	atopic	AD		1	0to4	high	High	Unclear/high	Low	Low										OR	0.69	0.35	1.35			OR	0.72	0.33	1.57		OR	-0.371064	0.342433	-0.328504	0.397745
Miyake	2010	OMCHS	prospective cohort	prospective	calcium intake pregenancy	CALCIUM	CALCIUM	MATERNAL MINERAL INTAKE	mother-pregnancy-intake	Q1 lowest intake	Q4 highest intake	HighestVSLowest	tertile-quartile-quintile	2=no	atopic	AD		2	0to4	low/normal	Low	Low	Low	Low										OR	0.99	0.61	1.63			OR	1.08	0.63	1.86		OR	-0.0100503	0.254403	0.076961	0.277355
Narita	2011	T-CHILD	prospective cohort	prospective	CALCIUM	CALCIUM	CALCIUM	MATERNAL MINERAL INTAKE	mother-pregnancy-intake	Q1 lowest intake	Q4 highest intake	HighestVSLowest	tertile-quartile-quintile	2=no	atopic	AD		0.6	0to4	low/normal	Unclear	Unclear/high	Unclear	Unclear-High										OR	0.632	0.429	0.932		Maternal intake volume of calcium was positively associated with eczema up to 6-8 months (Odds ratio (OR) between extreme quartiles was 0.632, 95%confidence interval (CI) 0.429- 0.932), but not with wheeze.						OR	-0.458866	0.198185
Devereux	2006	ABERDEEN COHORT	prospectvie cohort	prospective	Zinc	ZINC	ZINC	MATERNAL MINERAL INTAKE	mother-pregnancy-intake	lowest (Q1)	Highest (Q5)	HighestVSLowest	tertile-quartile-quintile	2=no	atopic	WHZ.REC		5	5to14	low/normal	Low	Low	Low	Low										OR	0.61	0.36	1.04			OR	0.51	0.27	0.97		OR	-0.494296	0.272203	-0.673345	0.328003
Litonjua	2006	PROJECT VIVA	prospectvie cohort	prospective	Zinc	ZINC	ZINC	MATERNAL MINERAL INTAKE	mother-pregnancy-intake	lowest	Highest	HighestVSLowest	tertile-quartile-quintile	2=no	atopic	WHZ.REC		2	0to4	low/normal	Unclear	Unclear/high	Low	Low										OR	0.41	0.24	0.69	0.004		OR	0.49	0.27	0.87	0.06	OR	-0.891598	0.265579	-0.71335	0.292902
Miyake	2010	OMCHS	prospective cohort	prospective	Maternal intake of zinc	ZINC	ZINC	MATERNAL MINERAL INTAKE	mother-pregnancy-intake	Q1 lowest intake	Q4 highest intake	HighestVSLowest	tertile-quartile-quintile	2=no	atopic	WHZ		2	0to4	low/normal	Low	Low	Low	Low										OR	0.74	0.46	1.19			OR	0.69	0.41	1.17		OR	-0.301105	0.242377	-0.371064	0.269422
Litonjua	2006	PROJECT VIVA	prospectvie cohort	prospective	Zinc	ZINC	ZINC	MATERNAL MINERAL INTAKE	mother-pregnancy-intake	lowest	Highest	HighestVSLowest	tertile-quartile-quintile	2=no	atopic	WHZ		2	0to4	low/normal	Unclear	Unclear/high	Low	Low										OR	0.49	0.34	0.7	<0.0001		OR	0.59	0.41	0.88	0.01	OR	-0.71335	0.181977	-0.527633	0.203979
West	2012	WEST, CE	prospective cohort	prospective	zinc	ZINC	ZINC	MATERNAL MINERAL INTAKE	mother-pregnancy-intake	Q1 - lowest	Q4 - highest	HighestVSLowest	tertile-quartile-quintile	2=no	atopic	WHZ		1	0to4	high	High	Unclear/high	Low	Low										OR	0.53	0.25	1.12			OR	0.47	0.2	1.08		OR	-0.634878	0.381738	-0.755023	0.424481
Miyake	2010	OMCHS	Prospective cohort	prospective	Maternal vitamin D intake (preg.)	VIT D	VITAMIN D	MATERNAL VITAMIN INTAKE	mother-pregnancy-intake	Quartile 1 (3.5)	Quartile 4 (9.1)	HighestVSLowest	tertile-quartile-quintile	2=no	atopic	WHZ		2	0to4	low/normal	Low	Low	Low	Low							42		53	OR	0.73	0.46	1.16		P for trend = 0.44	OR	0.69	0.42	1.14		OR	-0.314711	0.236291	-0.371064	0.256169
Devereux	2007	ABERDEEN COHORT	Prospective cohort	prospective	Maternal vitamin D intake (preg.)	VIT D	VITAMIN D	MATERNAL VITAMIN INTAKE	mother-pregnancy-intake	Quintile 1 (77, 46-92 IU/d)	Quintile 5 (275, 189-751 IU/d)	HighestVSLowest	tertile-quartile-quintile	2=no	atopic	WHZ		5	5to14	low/normal	High	Unclear/high	Low	Low										OR	0.53	0.34	0.85		Wald P test = 0.004	OR	0.56	0.31	1.01		OR	-0.634878	0.241	-0.579818	0.300902
Pike	2012	Southampton Women's Survey	Prospective cohort	prospective	Maternal vitamin D intake (preg.)	VIT D	VITAMIN D	MATERNAL VITAMIN INTAKE	mother-pregnancy-intake	Quartile 1	Quartile 4	HighestVSLowest	tertile-quartile-quintile	2=no	atopic	WHZ		6	5to14	low/normal	Low	Low	Low	Low										RR	1.03	0.86	1.23		P for trend = 0.87						RR	0.0295588	0.0905385
Carmargo	2007	PROJECT VIVA	Prospective cohort	prospective	Maternal vitamin D intake (preg.)	VIT D	VITAMIN D	MATERNAL VITAMIN INTAKE	mother-pregnancy-intake	Quartile 1 (356, 60-445 IU)	Quartile 4 (724, 659-1145)	HighestVSLowest	tertile-quartile-quintile	2=no	atopic	WHZ.REC		3	0to4	low/normal	Low	Low	Low	Low										OR	0.39	0.25	0.62		P for trend = <0.001	OR	0.41	0.24	0.7		OR	-0.941609	0.236517	-0.891598	0.27292
Devereux	2007	ABERDEEN COHORT	Prospective cohort	prospective	Maternal vitamin D intake (preg.)	VIT D	VITAMIN D	MATERNAL VITAMIN INTAKE	mother-pregnancy-intake	Quintile 1 (77, 46-92 IU/d)	Quintile 5 (275, 189-751 IU/d)	HighestVSLowest	tertile-quartile-quintile	2=no	atopic	WHZ.REC		5	5to14	low/normal	High	Unclear/high	Low	Low										OR	0.39	0.18	0.84		Wald P test = 0.01	OR	0.43	0.16	1.12		OR	-0.941609	0.391457	-0.84397	0.488418
Maslova	2013	DANISH BIRTH COHORT	Prospective cohort	prospective	Maternal vitamin D intake (preg.)	VIT D	VITAMIN D	MATERNAL VITAMIN INTAKE	mother-pregnancy-intake	Quintile 1 (5.5, 1.8-7.1)	Quintile 5 (16.5, 14.2-27.4)	HighestVSLowest	tertile-quartile-quintile	2=no	atopic	WHZ.REC		7	5to14	low/normal	Low	Low	Low	Low						5611	207	5728	219	RR	0.96	0.8	1.16			RR	0.91	0.75	1.11		RR	-0.040822	0.096552	-0.0943107	0.101363
Erkkola	2009	DIPP	prospective cohort	prospective	Maternal vitamin D intake (preg. FOOD)	VIT D	VITAMIN D	MATERNAL VITAMIN INTAKE	mother-pregnancy-intake	2nd & 3rd Quartiles (0.31-0.54 microg/MJ)	4th Quartile (>0.54 microg/MJ)	HighestVSLowest	tertile-quartile-quintile	2=no	atopic	WHZ.REC		5	5to14	low/normal	Low	Low	Low	Low																HR	0.81	0.45	1.47		HR			-0.210721	0.304073
Pike	2012	Southampton Women's Survey	Prospective cohort	prospective	Maternal vitamin D intake (preg.)	VIT D	VITAMIN D	MATERNAL VITAMIN INTAKE	mother-pregnancy-intake	Quartile 1	Quartile 4	HighestVSLowest	tertile-quartile-quintile	2=no	atopic	WHZ.REC		6	5to14	low/normal	Low	Low	Low	Low										RR	1.23	0.65	2.33		P for trend = 0.74						RR	0.207014	0.325946
Miyake	2011	OMCHS	prospectvie cohort	prospective	Maternal folate intake during pregnancy	FOLATE	FOLIC ACID	MATERNAL VITAMIN SUPPLEMENT [ANY]	mother-pregnancy-intake	Lowest Q1 [median 206.8 micrograms per day]	Highest Q4 [median 370.6 micrograms per day]	HighestVSLowest	tertile-quartile-quintile	2=no	atopic	WHZ		2	0to4	low/normal	Low	Low	Low	Low							40			OR	0.88	0.54	1.43			OR	1.28	0.65	2.5		OR	-0.127833	0.247708	0.24686	0.341546
Litonjua	2006	PROJECT VIVA	prospectvie cohort	prospective	Folic acid [supplemental or dietary - mostly supplemental]	FOLIC ACID	FOLIC ACID	MATERNAL VITAMIN SUPPLEMENT [ANY]	mother-pregnancy-suppl	lowest	Highest	HighestVSLowest	tertile-quartile-quintile	2=no	atopic	WHZ		2	0to4	low/normal	Unclear	Unclear/high	Low	Low										OR	0.64	0.45	0.91	0.002		OR	0.89	0.6	1.31	0.2	OR	-0.446287	0.17958	-0.116534	0.197225
Miyake	2010	OMCHS	prospective cohort	prospective	Maternal intake of b-carotene	B-CAROTENE	VITAMIN A	MATERNAL VITAMIN INTAKE	mother-pregnancy-intake	Q1 lowest intake	Q4 highest intake	HighestVSLowest	tertile-quartile-quintile	2=no	atopic	WHZ		2	0to4	low/normal	Low	Low	Low	Low										OR	1.19	0.74	1.93			OR	1.06	0.63	1.77		OR	0.173953	0.246718	0.0582689	0.261587
Litonjua	2006	PROJECT VIVA	prospectvie cohort	prospective	b-carotene	B-CAROTENE	VITAMIN A	MATERNAL VITAMIN INTAKE	mother-pregnancy-intake	lowest	Highest	HighestVSLowest	tertile-quartile-quintile	2=no	atopic	WHZ		2	0to4	low/normal	Unclear	Unclear/high	Low	Low										OR	0.71	0.5	1.02	0.04		OR	0.98	0.66	1.47	0.9	OR	-0.34249	0.184843	-0.0202027	0.20687
West	2012	WEST, CE	prospective cohort	prospective	b-carotene intake	B-CAROTENE	VITAMIN A	MATERNAL VITAMIN INTAKE	mother-pregnancy-intake	Q1 - lowest	Q4 - highest	HighestVSLowest	tertile-quartile-quintile	2=no	atopic	WHZ		1	0to4	high	High	Unclear/high	Low	Low										OR	0.77	0.38	1.57			OR	0.73	0.33	1.61		OR	-0.261365	0.36349	-0.314711	0.403543
Martindale	2005	ABERDEEN COHORT	prospective cohort	prospective	Vitamin C-dietary	VIT C	VITAMIN C	MATERNAL VITAMIN INTAKE	mother-pregnancy-intake	lowest	highest	HighestVSLowest	tertile-quartile-quintile	2=no	atopic	WHZ		2	0to4	low/normal	Low	Low	Low	Low										OR	1.4	0.83	2.36			OR	1.71	0.95	3.06		OR	0.336472	0.266423	0.536493	0.296899
Miyake	2010	OMCHS	prospective cohort	prospective	Maternal intake of Vitamin C	VIT C	VITAMIN C	MATERNAL VITAMIN INTAKE	mother-pregnancy-intake	Q1 lowest intake	Q4 highest intake	HighestVSLowest	tertile-quartile-quintile	2=no	atopic	WHZ		2	0to4	low/normal	Low	Low	Low	Low										OR	0.8	0.49	1.3			OR	0.98	0.58	1.66		OR	-0.223144	0.247708	-0.0202027	0.268888
Litonjua	2006	PROJECT VIVA	prospectvie cohort	prospective	Vitamin C	VIT C	VITAMIN C	MATERNAL VITAMIN INTAKE	mother-pregnancy-intake	lowest	Highest	HighestVSLowest	tertile-quartile-quintile	2=no	atopic	WHZ		2	0to4	low/normal	Unclear	Unclear/high	Low	Low										OR	0.67	0.47	0.94	0.01		OR	0.79	0.54	1.15	0.2	OR	-0.400478	0.172756	-0.235722	0.191574
West	2012	WEST, CE	prospective cohort	prospective	Vitamin C intake	VIT C	VITAMIN C	MATERNAL VITAMIN INTAKE	mother-pregnancy-intake	Q1 - lowest	Q4 - highest	HighestVSLowest	tertile-quartile-quintile	2=no	atopic	WHZ		1	0to4	high	High	Unclear/high	Low	Low										OR	0.4	0.18	0.87			OR	0.4	0.16	0.98		OR	-0.916291	0.396443	-0.916291	0.457188
Martindale	2005	ABERDEEN COHORT	prospective cohort	prospective	Vitamin E-dietary	VIT E	VITAMIN E	MATERNAL VITAMIN INTAKE	mother-pregnancy-intake	lowest	highest	HighestVSLowest	tertile-quartile-quintile	2=no	atopic	WHZ		2	0to4	low/normal	Low	Low	Low	Low										OR	0.57	0.35	0.92			OR	0.6	0.36	1		OR	-0.562119	0.244254	-0.510826	0.260625
Miyake	2010	OMCHS	prospective cohort	prospective	Maternal intake of Vitamin E	VIT E	VITAMIN E	MATERNAL VITAMIN INTAKE	mother-pregnancy-intake	Q1 lowest intake	Q4 highest intake	HighestVSLowest	tertile-quartile-quintile	2=no	atopic	WHZ		2	0to4	low/normal	Low	Low	Low	Low										OR	0.57	0.35	0.92			OR	0.54	0.32	0.9		OR	-0.562119	0.244254	-0.616186	0.260625
Litonjua	2006	PROJECT VIVA	prospectvie cohort	prospective	Vitamin E	VIT E	VITAMIN E	MATERNAL VITAMIN INTAKE	mother-pregnancy-intake	lowest	Highest	HighestVSLowest	tertile-quartile-quintile	2=no	atopic	WHZ		2	0to4	low/normal	Unclear	Unclear/high	Low	Low										OR	0.52	0.36	0.74	0.0004		OR	0.7	0.48	1.03	0.06	OR	-0.653926	0.180011	-0.356675	0.197058
West	2012	WEST, CE	prospective cohort	prospective	Vitamin	VIT E	VITAMIN E	MATERNAL VITAMIN INTAKE	mother-pregnancy-intake	Q1 - lowest	Q4 - highest	HighestVSLowest	tertile-quartile-quintile	2=no	atopic	WHZ		1	0to4	high	High	Unclear/high	Low	Low										OR	1.06	0.53	2.12			OR	0.77	0.36	1.66		OR	0.0582689	0.353647	-0.261365	0.39193
Devereux	2006	ABERDEEN COHORT	prospectvie cohort	prospective	Vitamin E intake during pregnancy	VIT E	VITAMIN E	MATERNAL VITAMIN INTAKE	mother-pregnancy-intake	lowest (Q1)	Highest (Q5)	HighestVSLowest	tertile-quartile-quintile	2=no	atopic	WHZ		5	5to14	low/normal	Low	Low	Low	Low										OR	0.49	0.5	1.18			OR	0.75	0.44	1.28		OR	-0.71335	0.4484	-0.287682	0.272726
Devereux	2006	ABERDEEN COHORT	prospectvie cohort	prospective	Vitamin E intake during pregnancy	VIT E	VITAMIN E	MATERNAL VITAMIN INTAKE	mother-pregnancy-intake	lowest (Q1)	Highest (Q5)	HighestVSLowest	tertile-quartile-quintile	2=no	atopic	WHZ.REC		5	5to14	low/normal	Low	Low	Low	Low										OR	0.59	0.35	1			OR	0.45	0.23	0.89		OR	-0.527633	0.2692	-0.798508	0.347946
Litonjua	2006	PROJECT VIVA	prospectvie cohort	prospective	Vitamin E	VIT E	VITAMIN E	MATERNAL VITAMIN INTAKE	mother-pregnancy-intake	lowest	Highest	HighestVSLowest	tertile-quartile-quintile	2=no	atopic	WHZ.REC		2	0to4	low/normal	Unclear	Unclear/high	Low	Low										OR	0.36	0.2	0.62	0.0007		OR	0.49	0.27	0.9	0.05	OR	-1.02165	0.277355	-0.71335	0.310199
Bekkers	2012	PIAMA	prospectvie cohort	prospective	Folic acid supplements during pregnancy	FOLIC ACID	FOLIC ACID	MATERNAL VITAMIN SUPPLEMENT [ANY]	mother-pregnancy-suppl	No folic acid or vitamin supplement during pregnancy	Folic acid supplement during pregnancy [approx 500mcg per day]	oftenVSnever-rare	yes-no	2=no	atopic	WHZ.REC		8	5to14	low/normal	Unclear	Unclear/high	Low	Low						1998		1302		Prevalence ratio (PR) generated using GEE	0.99	0.89	1.11			Adjusted Prevalence ratio (PR) - generated using GEE	1.03	0.92	1.16		PR	-0.0100503	0.0583726	0.0295588	0.0606435
Magdelijns	2011	KOALA	prospectvie cohort	prospective	FOLIC ACID-ANY - PREGNANCY	FOLIC ACID	FOLIC ACID	MATERNAL VITAMIN SUPPLEMENT [ANY]	mother-pregnancy-suppl	no use	yes	oftenVSnever-rare	yes-no	2=no	atopic	WHZ.REC		7	5to14	low/normal	Unclear	Unclear/high	Low	Low										OR	1.23	0.69	2.18			OR	1.19	0.65	2.2		OR	0.207014	0.291995	0.173953	0.313522
Magdelijns	2011	KOALA	prospectvie cohort	prospective	FOLIC ACID-ANY - PREGNANCY	FOLIC ACID	FOLIC ACID	MATERNAL VITAMIN SUPPLEMENT [ANY]	mother-pregnancy-suppl	no use	yes	oftenVSnever-rare	yes-no	2=no	atopic	WHZ		7	5to14	low/normal	Unclear	Unclear/high	Low	Low										OR	1.08	0.87	1.34			OR	0.99	0.8	1.23		OR	0.076961	0.110055	-0.0100503	0.110747
Bekkers	2012	PIAMA	prospectvie cohort	prospective	Folic acid supplements during pregnancy	FOLIC ACID	FOLIC ACID	MATERNAL VITAMIN SUPPLEMENT [ANY]	mother-pregnancy-suppl	No folic acid or vitamin supplement during pregnancy	Folic acid supplement during pregnancy [approx 500mcg per day]	oftenVSnever-rare	yes-no	2=no	atopic	WHZ		8	5to14	low/normal	Unclear	Unclear/high	Low	Low						1998		1302		Prevalence ratio (PR) generated using GEE	1	0.89	1.11			Adjusted Prevalence ratio (PR) - generated using GEE	1.07	0.96	1.2		PR	0	0.0532449	0.0676586	0.0585015
Erkkola	2009	DIPP	prospective cohort	prospective	Maternal vitamin D intake (preg.; supp)	VIT D	VITAMIN D	MATERNAL VITAMIN SUPPLEMENT [ANY]	mother-pregnancy-suppl	no use	use	oftenVSnever-rare	yes-no	2=no	atopic	AD		5	5to14	low/normal	Low	Low	Low	Low																OR	1.08	0.86	1.36		OR			0.076961	0.117614
de Jong	2012	GENERATION R	prospectvie cohort	prospective	FOLATE-MATERNAL SUPPL PREGNANCY	FOLATE	FOLIC ACID	MATERNAL VITAMIN SUPPLEMENT [ANY]	mother-pregnancy-suppl	No Folate during the first trimester	Folate supplement [usu about 400-500mcg daily] within 10 weeks of conception	oftenVSnever-rare	yes-no	2=no	atopic	AD		4	0to4	low/normal	Low	Low	Low	Low										OR	1.16	0.91	1.48			OR	1.15	0.9	1.47		OR	0.14842	0.124297	0.139762	0.125255
Magdelijns	2011	KOALA	prospectvie cohort	prospective	FOLIC ACID-ANY - PREGNANCY	FOLIC ACID	FOLIC ACID	MATERNAL VITAMIN SUPPLEMENT [ANY]	mother-pregnancy-suppl	no use	yes	oftenVSnever-rare	yes-no	2=no	atopic	AD		2	0to4	low/normal	Unclear	Unclear/high	Low	Low										OR	1.17	0.66	2.06			OR	1.15	0.63	2.1		OR	0.157004	0.288624	0.139762	0.307232
Bekkers	2012	PIAMA	prospectvie cohort	prospective	Folic acid supplements during pregnancy	FOLIC ACID	FOLIC ACID	MATERNAL VITAMIN SUPPLEMENT [ANY]	mother-pregnancy-suppl	No folic acid or vitamin supplement during pregnancy	Folic acid supplement during pregnancy [approx 500mcg per day]	oftenVSnever-rare	yes-no	2=no	atopic	AD		8	5to14	low/normal	Unclear	Unclear/high	Low	Low						1998		1302		Prevalence ratio (PR) generated using GEE	0.99	0.89	1.1			Adjusted Prevalence ratio (PR) - generated using GEE	0.98	0.87	1.09		PR	-0.0100503	0.0537554	-0.0202027	0.0542757
Bekkers	2012	PIAMA	prospectvie cohort	prospective	Multivitamin supplement during pregnancy	MULTIVITAMINS	MULTIVITAMIN	MATERNAL VITAMIN SUPPLEMENT [ANY]	mother-pregnancy-suppl	No folic acid or vitamin supplement during pregnancy	Multivitamin supplement during pregnancy [usually 400mcg daily folate dose]	oftenVSnever-rare	yes-no	2=no	atopic	AD		8	5to14	low/normal	Unclear	Unclear/high	Low	Low						287		1302		Prevalence ratio (PR) generated using GEE	1.1	0.91	1.32			Adjusted Prevalence ratio (PR) - generated using GEE	1.07	0.89	1.29		PR	0.0953102	0.0930212	0.0676586	0.0953998
Wang	2007	Tiawan Nationation Birth Cohort Study	prospective cohort	prospective	Specific food intake - maternal	CALCIUM	CALCIUM	MATERNAL MINERAL SUPPLEMENT	mother-pregnancy-suppl	No maternal intake during pregnancy	Maternal intake during pregnancy	oftenVSnever-rare	yes-no	2=no	atopic	AD		0.5	0to4	low/normal	Low	Low	Low	Low						152		1608		OR	1.22	0.83	1.79								OR	0.198851	0.195594
de Jong	2012	GENERATION R	prospectvie cohort	prospective	FOLATE-MATERNAL SUPPL PREGNANCY	FOLATE	FOLIC ACID	MATERNAL VITAMIN SUPPLEMENT [ANY]	mother-pregnancy-suppl	No Folate during the first trimester	Folate supplement [usu about 400-500mcg daily] within 10 weeks of conception	oftenVSnever-rare	yes-no	2=no	atopic	WHZ		4	0to4	low/normal	Low	Low	Low	Low										OR	0.94	0.81	1.07			OR	1.02	0.9	1.16		OR	-0.0618754	0.0660888	0.0198026	0.0656211
Magdelijns	2011	KOALA	prospectvie cohort	prospective	FOLIC ACID-ANY - PREGNANCY	FOLIC ACID	FOLIC ACID	MATERNAL VITAMIN SUPPLEMENT [ANY]	mother-pregnancy-suppl	no use	yes	oftenVSnever-rare	yes-no	2=no	atopic	WHZ		7	5to14	low/normal	Unclear	Unclear/high	Low	Low										OR	1.08	0.87	1.34			OR	0.99	0.8	1.23		OR	0.076961	0.110055	-0.0100503	0.110747
Haberg	2009	Norwegian Mother & Child Cohort Study	prospectvie cohort	prospective	Folic acid after first trimester	FOLIC ACID	FOLIC ACID	MATERNAL VITAMIN SUPPLEMENT [ANY]	mother-pregnancy-suppl	No folate in 2nd/3rd trimester	Folate supplement in 2nd/3rd trimester	oftenVSnever-rare	yes-no	2=no	atopic	WHZ		1.5	0to4	low/normal	Unclear	Unclear/high	Low	Low																RR	1	0.97	1.03		RR			0	0.015081
Bekkers	2012	PIAMA	prospectvie cohort	prospective	Folic acid supplements during pregnancy	FOLIC ACID	FOLIC ACID	MATERNAL VITAMIN SUPPLEMENT [ANY]	mother-pregnancy-suppl	No folic acid or vitamin supplement during pregnancy	Folic acid supplement during pregnancy [approx 500mcg per day]	oftenVSnever-rare	yes-no	2=no	atopic	WHZ		8	5to14	low/normal	Unclear	Unclear/high	Low	Low						1998		1302		Prevalence ratio (PR) generated using GEE	1	0.89	1.11			Adjusted Prevalence ratio (PR) - generated using GEE	1.07	0.96	1.2		PR	0	0.0532449	0.0676586	0.0585015
Bekkers	2012	PIAMA	prospectvie cohort	prospective	Multivitamin supplement during pregnancy	MULTIVITAMINS	MULTIVITAMIN	MATERNAL VITAMIN SUPPLEMENT [ANY]	mother-pregnancy-suppl	No folic acid or vitamin supplement during pregnancy	Multivitamin supplement during pregnancy [usually 400mcg daily folate dose]	oftenVSnever-rare	yes-no	2=no	atopic	WHZ		8	5to14	low/normal	Unclear	Unclear/high	Low	Low						287		1302		Prevalence ratio (PR) generated using GEE	1.04	0.85	1.27			Adjusted Prevalence ratio (PR) - generated using GEE	1.04	0.85	1.27		PR	0.0392207	0.101937	0.0392207	0.101937
Erkkola	2009	DIPP	prospective cohort	prospective	Maternal vitamin D intake (preg.; supp)	VIT D	VITAMIN D	MATERNAL VITAMIN SUPPLEMENT [ANY]	mother-pregnancy-suppl	no use	use	oftenVSnever-rare	yes-no	2=no	atopic	WHZ.REC		5	5to14	low/normal	Low	Low	Low	Low																HR	0.99	0.63	1.57		HR			-0.0100503	0.235268
Magdelijns	2011	KOALA	prospectvie cohort	prospective	FOLIC ACID-ANY - PREGNANCY	FOLIC ACID	FOLIC ACID	MATERNAL VITAMIN SUPPLEMENT [ANY]	mother-pregnancy-suppl	no use	yes	oftenVSnever-rare	yes-no	2=no	atopic	WHZ.REC		7	5to14	low/normal	Unclear	Unclear/high	Low	Low										OR	1.23	0.69	2.18			OR	1.19	0.65	2.2		OR	0.207014	0.291995	0.173953	0.313522
Milner	2004	National Maternal and Infant Health Survey and Longitudinal Follow Up	prospective cohort	prospective	NON-MILK FLUIDS VITAMINS AGE AT INTRODUCTION	VITAMINS	INFANT-MULTIVITAMIN	INFANT VITAMIN INTAKE [ANY]	infant-1st year-intake	no	intake in the first 6 months	oftenVSnever-rare	categ(months)	1=yes	atopic	WHZ.REC		3	0to4	low/normal	Unclear	Unclear/high	Low	Low										OR	1.13	0.98	1.3								OR	0.122218	0.0715034
Hypponen	2004	Northern Finland Birth Cohort	Prospective cohort	prospective	Infant vitamin D supplementation	VIT D	INFANT-MULTIVITAMIN	INFANT VITAMIN INTAKE [ANY]	infant-1st year-suppl	None/irregularly	Regularly	oftenVSnever-rare	yes-no	2=no	atopic	WHZ.REC		31	15plus	low/normal	Unclear	Unclear/high	Low	Low										OR	1.35	0.99	1.84		('Unadjusted - adjusted for sex)	OR	1.33	0.97	1.82		OR	0.300105	0.15799	0.285179	0.160029
Bekkers	2012	PIAMA	prospectvie cohort	prospective	Folic acid supplements during pregnancy	FOLIC ACID	FOLIC ACID	MATERNAL VITAMIN SUPPLEMENT [ANY]	mother-pregnancy-suppl	No folic acid or vitamin supplement during pregnancy	Folic acid supplement during pregnancy [approx 500mcg per day]	oftenVSnever-rare	yes-no	2=no	atopic	WHZ.REC		8	5to14	low/normal	Unclear	Unclear/high	Low	Low						1998		1302		Prevalence ratio (PR) generated using GEE	0.99	0.89	1.11			Adjusted Prevalence ratio (PR) - generated using GEE	1.03	0.92	1.16		PR	-0.0100503	0.0583726	0.0295588	0.0606435
Bekkers	2012	PIAMA	prospectvie cohort	prospective	Multivitamin supplement during pregnancy	MULTIVITAMINS	MULTIVITAMIN	MATERNAL VITAMIN SUPPLEMENT [ANY]	mother-pregnancy-suppl	No folic acid or vitamin supplement during pregnancy	Multivitamin supplement during pregnancy [usually 400mcg daily folate dose]	oftenVSnever-rare	yes-no	2=no	atopic	WHZ.REC		8	5to14	low/normal	Unclear	Unclear/high	Low	Low						287		1302		Prevalence ratio (PR) generated using GEE	1.03	0.84	1.25			Adjusted Prevalence ratio (PR) - generated using GEE	1	0.81	1.23		PR	0.0295588	0.0987677	0	0.105619
Pike	2012	Southampton Women's Survey	Prospective cohort	prospective	Average maternal daily vitamin D intake from FOOD during pregnancy	VIT D	VITAMIN D	MATERNAL VITAMIN INTAKE	mother-pregnancy-intake			continuous-EM	continuous	2=no	atopic	WHZ.REC		6	5to14	low/normal	Low	Low	Low	Low										RR	1.06	0.93	1.21	0.36	n = 689	RR	1.06	0.95	1.19	0.3	RR	0.0582689	0.0675263	0.0582689	0.0590227
Maslova	2013	DANISH BIRTH COHORT	Prospective cohort	prospective	Maternal vitamin D intake (preg.)	VIT D	VITAMIN D	MATERNAL VITAMIN INTAKE	mother-pregnancy-intake			continuous-EM	continuous	2=no	atopic	WHZ.REC		7	5to14	low/normal	Low	Low	Low	Low										RR	1	0.99	1.01			RR	1	0.99	1.01		RR	0	0.0050767	0	0.0050767
Cremers	2011	KOALA	Prospective cohort	prospective	Maternal plasma vitamin D	VIT D plasma		MATERNAL PLASMA VITAMIN D	mother-pregnancy-blood	Quintile 1 (21.5, 12.0-28.2)	Quintile 5 (72.6, 61.8-106.9)	HighestVSLowest	tertile-quartile-quintile	2=no	atopic	LF-FEV1(SDS)		6.5	5to14	low/normal	Low	Low	Low	Low										B	-0.09	-0.3	0.11		P for trend = 0.22	B	-0.1	-0.31	0.11		B	-0.09	0.1	-0.1	0.11
Wills	2013	ALSPAC	Prospective cohort	prospective	Maternal plasma vitamin D	VIT D plasma		MATERNAL PLASMA VITAMIN D	mother-pregnancy-blood	Quintile1 (min -38)	Quintile 5 (89-max)	HighestVSLowest	tertile-quartile-quintile	2=no	atopic	LF-FEV1(SDS)		8.7	5to14	low/normal	Unclear	Unclear/high	Low	Low										B	0.13	0.03	0.23	0.012		B	0.11	0.01	0.21	0.036	B	0.13	0.05	0.11	0.05
[truncated: 27 more columns]

## Sheet: REVIEW A-OBSERVAT
FIRST AUTHOR	YEAR OF PUBLICATION	STUDY NAME	STUDY DESIGN	STUDY DESIGN GROUP	EXPOSURE	SPECIFIC EXPOSURE	if exposure is categorical reference group	if exposure is categorical comparison groups	EXPOSURE cutoff	EXPOSURE GROUP	to reverse REFERENCE GROUP	CODE.larger comparison group	larger comparison group	OUTCOME	SPECIFIC OUTCOME	OUTCOME SUBGROUP	OUTCOME GROUP	SPECIFIC OUTCOME	AGE AT OUTCOME GROUP	AGE AT OUTCOME	DISEASE RISK	DISEASE RISK GROUP	Overall risk of bias	Overall.risk	Risk of Bias due to potential conflict of interest [No evidence of industry involvement = Low Risk of Bias]. Look at the the funding/acknowledgements/conflict of interest sections of the paper, if available	Risk of Bias due to potential conflict of interest [No evidence of industry involvement = Low Risk of Bias]. Look at the the funding/acknowledgements/conflict of interest sections of the paper, if available	No. EXPOSED in CASES (if exposure is categorical)	No. NON-Exposed in CASES (if exposure is categorical)	No. EXPOSED in CONTROLS (if exposure is categorical)	No. NON-Exposed in CONTROLS (if exposure is categorical)	Effect measure association (OR, HR, Mean Difference (B))	Effect size	95% CI [lower]	95% CI [upper]	p-value	Other	Effect measure association (OR, HR, Mean Difference (B))	adj. Effect size	adj.95% CI [lower]	adj.95% CI [upper]	adj.p-value	Other	Risk of Bias due to potential conflict of interest [No evidence of industry involvement = Low Risk of Bias]. Look at the the funding/acknowledgements/conflict of interest sections of the paper, if available	FINAL_Effect	unadj.lnOR (RAW NUMBERS OR unadj.OR/RR/HR)	unadj.SE(lnOR) (RAW NUMBERS OR unadj.OR/RR/HR)	adj.lnOR.original	adj.SE(lnOR)	Final.lnOR.original
AUTHOR	YEAR	STUDY	Design	design	EXPOSURE	exp	if exposure is categorical reference group	if exposure is categorical comparison groups	cutoff	cutoff_new	toreverse	CODE.larger.group	larger comp.group	OUTCOME	SPECIFIC OUTCOME	specific outcome	class.out	sp.out	CODE.AGE	age.last FU	risk of disease	Disease.risk	Overall risk of bias	Overall.risk	Risk of Bias due to potential conflict of interest [No evidence of industry involvement = Low Risk of Bias]. Look at the the funding/acknowledgements/conflict of interest sections of the paper, if available	Risk of Bias due to potential conflict of interest [No evidence of industry involvement = Low Risk of Bias]. Look at the the funding/acknowledgements/conflict of interest sections of the paper, if available	No. EXPOSED in CASES (if exposure is categorical)	No. NON-Exposed in CASES (if exposure is categorical)	No. EXPOSED in CONTROLS (if exposure is categorical)	No. NON-Exposed in CONTROLS (if exposure is categorical)	Effect measure association (OR, HR, Mean Difference (B))	Effect size	95% CI [lower]	95% CI [upper]	p-value	Other	Effect measure association (OR, HR, Mean Difference (B))	adj. Effect size	adj.95% CI [lower]	adj.95% CI [upper]	adj.p-value	Other	Risk of Bias due to potential conflict of interest [No evidence of industry involvement = Low Risk of Bias]. Look at the the funding/acknowledgements/conflict of interest sections of the paper, if available	FINAL_Effect	combined.unadj.lnOR.original	combined.unadj.SE(lnOR)	adj.lnOR.original	adj.SE(lnOR)	Final.lnOR.original
Matheson (FH+)	2007	Tasmanian ASTHMA Study	prospective cohort	prospective	Duration of exclusive breastfeeding	eBF	<3	3	3	3to4	2	>=3		Asthma-Wheeze	Asthma		atopic	wheeze.rec	ge15	32	high	high	Unclear	Other	High	Unclear-High											OR	1.84	1.03	3.29			High	OR	0.29	0.22	0.61	0.3	0.61
Matheson (FH-)	2007	Tasmanian ASTHMA Study	prospective cohort	prospective	Duration of exclusive breastfeeding	eBF	<3	3	3	3to4	2	>=3		Asthma-Wheeze	Asthma		atopic	wheeze.rec	ge15	32	normal/low	low	Unclear	Other	High	Unclear-High											OR	1.06	0.69	1.62			High	OR	0.1	0.18	0.06	0.22	0.06
Matheson (FH+)	2007	Tasmanian ASTHMA Study	prospective cohort	prospective	Duration of exclusive breastfeeding	eBF	<3	3	3	3to4	2	>=3		Asthma-Wheeze	Asthma		atopic	wheeze.rec	5to14	7	high	high	Unclear	Other	High	Unclear-High											OR	0.75	0.58	0.97			High	OR	-0.32	0.12	-0.29	0.13	-0.29
Matheson (FH-)	2007	Tasmanian ASTHMA Study	prospective cohort	prospective	Duration of exclusive breastfeeding	eBF	<3	3	3	3to4	2	>=3		Asthma-Wheeze	Asthma		atopic	wheeze.rec	5to14	7	normal/low	low	Unclear	Other	High	Unclear-High											OR	1.12	0.91	1.37			High	OR	0.06	0.09	0.11	0.1	0.11
Rylander	1993	Rylander, E.	CASE CONTROL	retrospective	Duration of exclusive breastfeeding	eBF	?3	>3	3	3to4	2	>=3		Asthma-Wheeze	wheeze		atopic	wheeze	0to4	4	normal/low	normal	High	Other	High	Unclear-High	112	87	233	118							OR						High	OR	-0.43	0.18			-0.43
Stene	2003	Stene, L. C.	case control	retrospective	BF present/absent	eBF	0	3.5-6	0	0to2	2	3.5-6		DM	Medical diagnosis	TIDM	autoim	TIDM	auto	9	normal/low	normal	Unclear	Other	High	Unclear-High	77		38		OR	0.537634	0.355872	0.813008	p for trend = <0.001		OR	0.689655	0.398406	1.20482	p for trend = 0.004		High	OR	-0.62	0.21	-0.37	0.28	-0.37
Matheson	2007	Tasmanian ASTHMA Study	prospective cohort	prospective	Duration of exclusive breastfeeding	eBF	<3	3	3	3to4	2	>=3		Food Allergy	ANY FOOD		atopic	FA-ANY	ge15	44	normal/low	normal	Unclear	Other	High	Unclear-High											OR	1.25	1.05	1.51		NO SIGN. INTERACTION WITH MATERNAL ALLERGY	High	OR	0.21	0.09	0.22	0.1	0.22
Matheson	2007	Tasmanian ASTHMA Study	prospective cohort	prospective	Duration of exclusive breastfeeding	eBF	<3	3	3	3to4	2	>=3		Rhinoconjunctivits	ALLERGIC RHINITIS		atopic	AR	ge15	44	normal/low	normal	Unclear	Other	High	Unclear-High											OR	1.14	1.01	1.28		NO SIGN. INTERACTION WITH MATERNAL ALLERGY	High	OR	0.11	0.06	0.13	0.06	0.13
Kellberger	2012	SOLAR survey (f.u)	prospective cohort	prospective	Duration of exclusive breastfeeding	eBF	>=2	<2	2	0to2	1	>=2		Rhinoconjunctivits	Ever AR		atopic	AR	ge15	6TO18	normal/low	normal	Unclear	Other	High	Unclear-High					OR	3.5	2.2	4.9			or	1.6	1.1	2.2			High	or	1.25	0.17	0.47	0.16	0.47
Laubereau	2003	GINI	prospective cohort	prospective	Duration of exclusive breastfeeding	eBF	<4	4	4	3to4	2	4		AD	Ever AD		atopic	AD	0to4	3	normal/low	normal	Low	Low	High	Unclear-High					OR	1.08					OR	0.95	0.79	1.14			High	OR			-0.05	0.09	-0.05
Matheson	2007	Tasmanian ASTHMA Study	prospective cohort	prospective	Duration of exclusive breastfeeding	eBF	<3	3	3	3to4	2	>=3		AD	EVER eczema		atopic	AD	ge15	44	normal/low	normal	Unclear	Other	High	Unclear-High											OR	1.06	0.95	1.19			High	OR			0.06	0.06	0.06
Gruber	2010	MIPS-1	prospective cohort	prospective	Total BF duration	eBF	<2	2+	2	0to2	2		>=2	Allergic Sensitization	sIgE - CM	sIgE-CM	atopic	CM	0to4	1	normal/low	Low	High	Other	High	Unclear-High																	High	OR	-0.99	1.08			-0.99
Gruber	2010	MIPS-1	prospective cohort	prospective	Total BF duration	eBF	<2	2+	2	0to2	2		>=2	Allergic Sensitization	sIgE - egg	sIgE-EGG	atopic	EGG	0to4	1	normal/low	Low	High	Other	High	Unclear-High																	High	OR	0.61	0.93			0.61
Koplin	2010	HealthNUTS	prospective cohort	prospective	SOLID FOOD	solid	<4	>6	4	3to4	2	long	>=6	FOOD ALLERGY	IgE-mediated egg allergy		atopic	FA-EGG	0to4	1	low	low/normal	Low	Low	High	Unclear-High					OR	1.3	0.3	5.5			OR	0.7	0.2	3			High	OR	0.26	0.74	-0.36	0.74	-0.36
Martel	2008	Martel, M. J.	nested case-control	prospective	Total duration of breastfeeding	TBF	0	?6	0	0	2	long	>=6	Asthma-Wheeze	Doctor-diagnosed Asthma		atopic	wheeze.rec	5to14	<10	normal	low/normal	High	Other	High	Unclear-High					OR	0.6	0.46	0.78	<0.01		OR	0.77	0.57	1.03			High	OR	-0.51	0.13	-0.26	0.15	-0.26
Björkstén	2011	ISAAC Phase 3	CROSS SECTIONAL	retrospective	Ever breastfed	TBF	never	ever	0	0	2	>0	>0	Asthma-Wheeze	Asthma Ever		atopic	wheeze.rec	5to14	7	normal	low/normal	Low	Low	High	Unclear-High					OR						OR	0.96	0.9	1.03			High	OR			-0.04	0.04	-0.04
Björkstén	2011	ISAAC Phase 3	CROSS SECTIONAL	retrospective	Ever breastfed	TBF	never	ever	0	0	2	>0	>0	Asthma-Wheeze	current wheeze		atopic	wheeze	5to14	7	normal	low/normal	Low	Low	High	Unclear-High					OR						OR	0.99	0.92	1.05			High	OR			-0.01	0.03	-0.01
Miskelly	1988	Miskelly, South Whales	prospective cohort (of RCT)	prospective	duration of total BF	TBF	never	ever	0	0	2	>0	>0	Asthma-Wheeze	wheeze		atopic	wheeze	0to4	1	high	high	High	Other	High	Unclear-High									<0.001								High	OR	-0.99	0.21			-0.99
Miskelly	1988	Miskelly, South Whales	prospective cohort (of RCT)	prospective	duration of total BF	TBF	<6	>=6	6	5to7	2	>=6	>=6	Asthma-Wheeze	wheeze		atopic	wheeze	0to4	1	high	high	High	Other	High	Unclear-High																	High	OR	-0.35	0.37			-0.35
Thompson	1999	NSHD+NCDS Surveys	NESTED CASE CONTROL	prospective	Ever breastfed	TBF	never	ever	0	0	2	>0	>0	IBD	Ulcerarive colitis		autoim	IBD-UC	auto	33-43	normal	low/normal	High	Other	High	Unclear-High	23	4	146	70	OR	2.76	0.86	9.81	0.1		OR						High	OR	1.02	0.65			1.02
Thompson	1999	NSHD+NCDS Surveys	NESTED CASE CONTROL	prospective	Ever breastfed	TBF	never	ever	0	0	2	>0	>0	IBD	Crohn's disease		autoim	IBD-CRD	auto	33-43	normal	low/normal	High	Other	High	Unclear-High	13	11	139	47	OR	0.4	0.15	1.03	0.06		OR						High	OR	-0.92	0.48			-0.92
Koplin	2010	HealthNUTS	prospective cohort	prospective	Total breastfeeding duration	TBF	<1	>12	1	1to2	2	long	>=12	FOOD ALLERGY	IgE-mediated egg allergy		atopic	FA-EGG	0to4	1	low	low/normal	Low	Low	High	Unclear-High					OR	2.1	1.2	3.7			OR	0.7	0.4	1.4			High	OR	0.74	0.29	-0.36	0.35	-0.36
Björkstén	2011	ISAAC Phase 3	CROSS SECTIONAL	retrospective	Ever breastfed	TBF	never	ever	0	0	2	>0	>0	Rhinoconjunctivits	Hay Fever Ever		atopic	AR	5to14	7	normal	low/normal	Low	Low	High	Unclear-High					OR						OR	0.93	0.86	1			High	OR			-0.07	0.04	-0.07
Miskelly	1988	Miskelly, South Whales	prospective cohort (of RCT)	prospective	duration of total BF	TBF	never	ever	0	0	2	>0	>0	Rhinoconjunctivits	nasal discharge		atopic	AR	0to4	1	high	high	High	Other	High	Unclear-High																	High	OR	-0.33	0.19			-0.33
Björkstén	2011	ISAAC Phase 3	CROSS SECTIONAL	retrospective	Ever breastfed	TBF	never	ever	0	0	2	>0	>0	AD	Eczema Ever		atopic	AD	5to14	7	normal	low/normal	Low	Low	High	Unclear-High					OR						OR	1.05	1	1.11			High	OR			0.05	0.03	0.05
Miskelly	1988	Miskelly, South Whales	prospective cohort (of RCT)	prospective	duration of total BF	TBF	never	ever	0	0	2	>0	>0	AD	eczema		atopic	AD	0to4	1	high	high	High	Other	High	Unclear-High									ns	The incidence of eczema was similar in those ever and never breast fed (35% and 40%, respectively), so the effect of duration on eczema was not examined.							High	OR	-0.21	0.19			-0.21
Sicherer	2010	The Consortium of Food Allergy Research	prospective cohort	prospective	Ever breastfed	TBF	ever	never	0	0	1	>0	>0	Allergic Sensitization	IgE-peanut	sIgE-PEANUT	atopic	PEANUT	0to4	1	high	high	High	Other	High	Unclear-High					OR				ns	(Additional analyses of peanut specific IgE sensitization (>0.35 kUA/L) and linear regression modeling was performed. Univariate analyses were also performed for detectable peanut IgE (>0.35 kUA/L), and results showed similar trends and conclusions as those for peanut IgE >5 kUA/L.)					not tested		High	OR	-0.11	0.28			-0.11
Nagel (Affluent countries)	2008	ISAAC Phase 2 - Affluent countries	CROSS SECTIONAL	retrospective	Duration of exclusive breastfeeding	eBF	0	?4	0	0to2	2	>=4		Asthma-Wheeze	Nonatopic Wheeze		atopic	wheeze-non atopic	5to14	12	normal/low	normal	High	Other	Low	Low					OR	0.96	0.72	1.27			OR	0.98	0.73	1.31			Low	OR	-0.04	0.14	-0.02	0.15	-0.02
Nagel (Non Affluent countries)	2008	ISAAC Phase 2- Nonaffluent countries	CROSS SECTIONAL	retrospective	Duration of exclusive breastfeeding	eBF	0	?4	0	0to2	2	>=4		Asthma-Wheeze	Nonatopic Wheeze		atopic	wheeze-non atopic	5to14	12	normal/low	normal	High	Other	Low	Low					OR	0.73	0.55	0.98			OR	0.75	0.55	1			Low	OR	-0.31	0.15	-0.29	0.15	-0.29
Salam	2003	Child Health's Study	nested case-control	prospective	Duration of exclusive breastfeeding	eBF	?4	<4	4	3to4	1	>=4		Asthma-Wheeze	late-onset asthma		atopic	wheeze-Late onset	5to14	6TO18	normal/low	normal	Unclear	Other	Low	Low	35	31	121	280	OR						OR	1.98	0.96	4.07			Low	OR	0.96	0.27	0.68	0.37	0.68
Salam	2003	Child Health's Study	nested case-control	prospective	Duration of exclusive breastfeeding	eBF	?4	<4	4	3to4	1	>=4		Asthma-Wheeze	Early-transient wheeze		atopic	wheeze-Early transient	5to14	6TO18	normal/low	normal	Unclear	Other	Low	Low	14	32	121	280	OR						OR	1.34	0.54	3.33			Low	OR	0.01	0.34	0.29	0.46	0.29
Simon	2008	Childhood Atopy Study (CAS)	prospective cohort	prospective	Duration of exclusive breastfeeding	eBF	0	>=4	0	0to2	2	>=4		Asthma-Wheeze	transient wheeze		atopic	wheeze-Early transient	5to14	6	normal/low	normal	Unclear	Other	Low	Low											RR	0.9	0.7	1.1			Low	RR	-0.51	0.29	-0.11	0.1	-0.11
Nagel (Affluent countries)	2008	ISAAC Phase 2 - Affluent countries	CROSS SECTIONAL	retrospective	Duration of exclusive breastfeeding	eBF	0	?4	0	0to2	2	>=4		Asthma-Wheeze	Atopic Wheeze		atopic	wheeze-atopic	5to14	12	normal/low	normal	High	Other	Low	Low					OR	0.9	0.68	1.21			OR	0.92	0.69	1.24			Low	OR	-0.11	0.15	-0.08	0.15	-0.08
Nagel (Non Affluent countries)	2008	ISAAC Phase 2- Nonaffluent countries	CROSS SECTIONAL	retrospective	Duration of exclusive breastfeeding	eBF	0	?4	0	0to2	2	>=4		Asthma-Wheeze	Atopic Wheeze		atopic	wheeze-atopic	5to14	12	normal/low	normal	High	Other	Low	Low					OR	0.66	0.44	0.98			OR	0.68	0.44	1.05			Low	OR	-0.42	0.2	-0.39	0.22	-0.39
Kull	2010	BAMSE	prospective cohort	prospective	Duration of exclusive breastfeeding	eBF	< 4	>= 4	4	3to4	2	>=4		Asthma-Wheeze	Non Atopic Asthma		atopic	wheeze.rec-non atopic	0to4	4	normal/low	normal	Low	Low	Low	Low											OR	0.8	0.45	1.4			Low	OR			-0.22	0.29	-0.22
Kull	2004	BAMSE	prospective cohort	prospective	Duration of exclusive breastfeeding	eBF	<=2	=>5	2	0to2	2	>=5		Asthma-Wheeze	NON ATOPIC Asthma		atopic	wheeze.rec-non atopic	0to4	4	normal/low	normal	Low	Low	Low	Low											OR	0.64	0.38	1.07			Low	OR	-0.47	0.27	-0.45	0.26	-0.45
Kull	2010	BAMSE	prospective cohort	prospective	Duration of exclusive breastfeeding	eBF	< 4	>= 4	4	3to4	2	>=4		Asthma-Wheeze	Non Atopic Asthma		atopic	wheeze.rec-non atopic	5to14	8	normal/low	normal	Low	Low	Low	Low											OR	1.18	0.56	2.48			Low	OR			0.17	0.38	0.17
Kull	2010	BAMSE	prospective cohort	prospective	Duration of exclusive breastfeeding	eBF	< 4	>= 4	4	3to4	2	>=4		Asthma-Wheeze	Atopic Asthma		atopic	wheeze.rec-atopic	0to4	4	normal/low	normal	Low	Low	Low	Low											OR	0.69	0.37	1.29			Low	OR			-0.37	0.32	-0.37
Kull	2004	BAMSE	prospective cohort	prospective	Duration of exclusive breastfeeding	eBF	<=2	=>5	2	0to2	2	>=5		Asthma-Wheeze	ATOPIC Asthma		atopic	wheeze.rec-atopic	0to4	4	normal/low	normal	Low	Low	Low	Low											OR	0.45	0.21	0.96			Low	OR	-0.97	0.37	-0.8	0.39	-0.8
Kull	2010	BAMSE	prospective cohort	prospective	Duration of exclusive breastfeeding	eBF	< 4	>= 4	4	3to4	2	>=4		Asthma-Wheeze	Atopic Asthma		atopic	wheeze.rec-atopic	5to14	8	normal/low	normal	Low	Low	Low	Low											OR	0.58	0.37	0.93			Low	OR			-0.54	0.24	-0.54
Fergusson	1983	Chirstchurch Child Development Study	prospective cohort	prospective	Duration of exclusive breastfeeding	eBF	<4	4	4	3to4	2	4		Asthma-Wheeze	Ever Asthma(DD)		atopic	wheeze.rec	0to4	4	normal/low	normal	High	Other	Low	Low																	Low	OR	0.34	0.48			0.34
Miyake	2008	Osaka Maternal and Child Health Study (OMCHS)	prospective cohort	prospective	Duration of exclusive breastfeeding	eBF	< 4	>=4	4	3to4	2	>=4		Asthma-Wheeze	Ever Asthma(DD)		atopic	wheeze.rec	0to4	2	normal/low	normal	High	Other	Low	Low					OR	1.09	0.54	2.2			OR	1.07	0.52	2.23			Low	OR	0.09	0.36	0.07	0.37	0.07
Siltanen	2003	Saarinen KM, 1999 (#1282)	prospective cohort (of RCT)	prospective	duration of exclusive breastfeeding	eBF	<3	>=3	3	3to4	2	>=3		Asthma-Wheeze	Asthma		atopic	wheeze.rec	0to4	4	normal/low	normal	High	Other	Low	Low																	Low	OR	0.41	0.5			0.41
Wilson	1998	Dundee infant feeding study	prospective cohort	prospective	Duration of exclusive breastfeeding	eBF	>=4	<4	4	3to4	1	>=4		Asthma-Wheeze	Ever Asthma(DD)		atopic	wheeze.rec	5to14	7	normal/low	normal	High	Other	Low	Low																	Low	OR	0.69	0.41			0.69
Nagel (Affluent countries)	2008	ISAAC Phase 2 - Affluent countries	CROSS SECTIONAL	retrospective	Duration of exclusive breastfeeding	eBF	0	?4	0	0to2	2	>=4		Asthma-Wheeze	ever Asthma		atopic	wheeze.rec	5to14	12	normal/low	normal	High	Other	Low	Low					OR	0.87	0.75	1.02			OR	0.91	0.78	1.07			Low	OR	-0.14	0.08	-0.09	0.08	-0.09
Nagel (Non Affluent countries)	2008	ISAAC Phase 2- Nonaffluent countries	CROSS SECTIONAL	retrospective	Duration of exclusive breastfeeding	eBF	0	?4	0	0to2	2	>=4		Asthma-Wheeze	ever Asthma		atopic	wheeze.rec	5to14	12	normal/low	normal	High	Other	Low	Low					OR	0.74	0.59	0.92			OR	0.75	0.6	0.94			Low	OR	-0.3	0.11	-0.29	0.12	-0.29
Erkkola	2012	DIPP (Type 1 Diabetes Prediction and Prevention Project)	prospective cohort	prospective	Duration of exclusive breastfeeding	eBF	1st third	3rd third	1	0to2	2	>=3		Asthma-Wheeze	Asthma(ICS/excercise).12mo		atopic	wheeze.rec	5to14	5	normal/low	normal	High	Other	Low	Low					chi square												Low	OR	-0.53	0.21			-0.53
Rothenbacher	2005	Rothenbacher, Ulm University	prospective cohort	prospective	Duration of exclusive breastfeeding	eBF	<3	>6	3	3to4	2	>=3		Asthma-Wheeze	Ever Asthma(DD)		atopic	wheeze.rec	0to4	2	normal/low	normal	Low	Low	Low	Low																	Low	OR	-0.48	0.22			-0.48
Kull	2002	BAMSE	prospective cohort	prospective	Duration of exclusive breastfeeding	eBF	< 4	>= 4	4	3to4	2	>=4		Asthma-Wheeze	Ever Asthma(ICS/excercise)		atopic	wheeze.rec	0to4	2	normal/low	normal	Low	Low	Low	Low											OR	0.66	0.51	0.87			Low	OR	-0.46	0.13	-0.42	0.14	-0.42
Arshad	1992	Isle of Wight Prevention Study	prospective cohort	prospective	Duration of exclusive breastfeeding	eBF	<3	3	3	3to4	2	>=3		Asthma-Wheeze	Asthma.12mo		atopic	wheeze.rec	0to4	1	normal/low	normal	Low	Low	Low	Low											OR	1.65	0.91	2.99			Low	OR	-0.64	0.23	0.5	0.3	0.5
Hetzner	2009	Early Child Longitudinal Study Birth Cohort	prospective cohort	prospective	Duration of exclusive breastfeeding	eBF	6	< 6	6	ge5	1	6		Asthma-Wheeze	Ever Asthma (DD)		atopic	wheeze.rec	0to4	2	normal/low	normal	Low	Low	Low	Low					OR				NS		OR	0.92	0.54	1.56			Low	OR			-0.08	0.27	-0.08
Strassburger	2010	Strassburger, Sao Leopoldo Brazil	prospective cohort	prospective	duration of exclusive breastfeeding	eBF	>=6	<6	6	ge5	1	>=6		Asthma-Wheeze	EVER ASTHMA		atopic	wheeze.rec	0to4	3.5	normal/low	normal	Low	Low	Low	Low					OR	1.55	0.61	3.92	0.351		OR					hierarchical logistic model (The third level (Level III) included variables related to feeding practices in the first year of life, with p < 0.2 on crude analysis, and variables that remained in previous models, being considered statistically significant when p < 0.05.)- NOT INCLDUDED IN THE FINAL MODEL	Low	OR	0.44	0.47			0.44
Pesonen	2006	Pesonen	prospective cohort	prospective	Duration of exclusive breastfeeding	eBF	<9	>=9	9	ge5	2	>0		Asthma-Wheeze	recurrent wheeze		atopic	wheeze.rec	ge15	20	normal/low	normal	Low	Low	Low	Low					OR	1.4	0.5	4.3	0.51								Low	OR	0.34	0.57			0.34
Pesonen	2006	Pesonen	prospective cohort	prospective	Duration of exclusive breastfeeding	eBF	<2	2- <6	2	0to2	2	>=2		Asthma-Wheeze	recurrent wheeze		atopic	wheeze.rec	ge15	20	normal/low	normal	Low	Low	Low	Low																	Low	OR	-0.83	0.62			-0.83
Mihrshahi	2007	Childhood ASTHMA Prevention Study (CAPS)	prospective cohort	prospective	Duration of exclusive breastfeeding	eBF	<3	3	3	3to4	2	>=3		Asthma-Wheeze	Ever Asthma(DD)		atopic	wheeze.rec	5to14	5	high	high	Low	Low	Low	Low					OR	0.9	0.56	1.47			OR	0.93	0.56	1.53			Low	OR	-0.11	0.25	-0.07	0.25	-0.07
Kull	2010	BAMSE	prospective cohort	prospective	Duration of exclusive breastfeeding	eBF	< 4	>= 4	4	3to4	2	>=4		Asthma-Wheeze	Ever Asthma(ICS/excercise)		atopic	wheeze.rec	5to14	8	normal/low	normal	Low	Low	Low	Low											OR	0.63	0.5	0.78			Low	OR			-0.46	0.11	-0.46
Horwood	1995	Christchurch Child Development Study	prospective cohort	prospective	Duration of exclusive breastfeeding	eBF	<4	4	4	3to4	2	4		Asthma-Wheeze	Ever Asthma(DD)		atopic	wheeze.rec	5to14	6	normal/low	normal	Low	Low	Low	Low									ns								Low	OR	0.34	0.24			0.34
Kurukulaaratchy	2004	Isle of Wight Prevention Study	prospective cohort	prospective	Duration of exclusive breastfeeding	eBF	<3	3	3	3to4	2	>=3		Asthma-Wheeze	early-onset persistent wheezers		atopic	wheeze.rec	5to14	10	normal/low	normal	Low	Low	Low	Low					OR	0.38	0.24	0.62							NS	non estatistically significant	Low	OR	-0.97	0.25			-0.97
Pesonen	2006	Pesonen	prospective cohort	prospective	Duration of exclusive breastfeeding	eBF	<9	>=9	9	ge5	2	>=9		Asthma-Wheeze	recurrent wheeze		atopic	wheeze.rec	5to14	5	normal/low	normal	Low	Low	Low	Low					OR	6.1	0.9	38.4	0.03								Low	OR	1.81	0.94			1.81
Pesonen	2006	Pesonen	prospective cohort	prospective	Duration of exclusive breastfeeding	eBF	<2	>=9	2	0to2	2	>=9		Asthma-Wheeze	recurrent wheeze		atopic	wheeze.rec	5to14	5	normal/low	normal	Low	Low	Low	Low																	Low	OR	0.96	1.18			0.96
Mai	2007	SAGE	nested case-control	prospective	Duration of exclusive breastfeeding	eBF	?3	<3	3	3to4	1	>=3		Asthma-Wheeze	Doctor-diagnosed Asthma		atopic	wheeze.rec	5to14	10	normal/low	normal	Unclear	Other	Low	Low					OR	1.38	1	1.89	<0.05		OR	1.37	0.97	1.94			Low	OR	0.32	0.16	0.31	0.18	0.31
Whu	2007	Whu, R., BRONX, NY	CASE CONTROL	retrospective	Exclusive BF	eBF	exclusive BF first 3 months	not exlusive BF first 3 months	3	3to4	1	>=3		Asthma-Wheeze	Asthma diagnosis		atopic	wheeze.rec	0to4	4	normal/low	normal	High	Other	Low	Low	10	91	34	126						X2 = 5.65; df = 1; p = 0.03.							Low	OR	-0.9	0.39			-0.9
Garcia-Marcos	2010	‘Estudio Internacional de Sibilancias en Lactantes’’ (EISL) (International Study of Wheezing in Infants)	CROSS SECTIONAL	retrospective	Duration of exclusive breastfeeding	eBF	?3	>3	3	3to4	2	>=3		Asthma-Wheeze	Recurrent wheezing (RW)		atopic	wheeze.rec	0to4	1	normal/low	normal	High	Other	Low	Low					OR						OR	0.79	0.72	0.87			Low	OR			-0.24	0.05	-0.24
Tanaka	2009	Fukuoka Child Health Study	CROSS SECTIONAL	retrospective	Duration of exclusive breastfeeding	eBF	<4	?4	4	3to4	2	>=4		ASTHMA	Asthma		atopic	wheeze.rec	0to4	3	normal/low	normal	High	Other	Low	Low					OR	0.69	0.51	0.95			OR	0.69	0.5	0.96			Low	OR	-0.37	0.16	-0.37	0.17	-0.37
Huang	2013	Huang	prospective cohort	prospective	exclusive breastfeeding	eBF	no	exclusive vs non exclusive breastfeeding	6	ge5	2	>=6		Asthma-Wheeze	Infant or baby asthma		atopic	wheeze.rec	0to4	2	normal/low	normal	High	Other	Low	Low					OR	0.191	0.045	0.818	0.0257		Not available						Low	OR	-1.66	0.74			-1.66
Rothenbacher	2005	Rothenbacher, Ulm University	prospective cohort	prospective	Duration of exclusive breastfeeding	eBF	<3	0	0	0to2	1	0-3		Asthma-Wheeze	Ever Asthma(DD)		atopic	wheeze.rec	0to4	2	normal/low	normal	Low	Low	Low	Low																	Low	OR	-0.33	0.32			-0.33
Wright (FH+)	2001	Tuscon Children's Respiratory Study	prospective cohort	prospective	Duration of exclusive breastfeeding	eBF	0	>=4	0	0to2	2	>=4		Asthma-Wheeze	recurrent wheeze		atopic	wheeze.rec	0to4	3	high	high	High	Other	Low	Low																	Low	OR	-0.88	0.83			-0.88
Wright (FH-)	2001	Tuscon Children's Respiratory Study	prospective cohort	prospective	Duration of exclusive breastfeeding	eBF	0	>=4	0	0to2	2	>=4		Asthma-Wheeze	recurrent wheeze		atopic	wheeze.rec	0to4	3	normal/low	low	High	Other	Low	Low																	Low	OR	-0.68	0.33			-0.68
Ehlayel	2008	Hamad Medical Corportation, Qatar	CROSS SECTIONAL	retrospective	Duration of exclusive breastfeeding	eBF	?6	<6	6	ge5	1	>=6		ASTHMA	Doctor-diagnosed Asthma		atopic	wheeze.rec	5to14	5	normal/low	low	High	Other	Low	Low					OR	1.98	1.49	2.63	0.001								Low	OR	0.68	0.14			0.68
Wright	2001	Tuscon Children's Respiratory Study	prospective cohort	prospective	Duration of exclusive breastfeeding	eBF	0	>=4	0	0to2	2	>=4		Asthma-Wheeze	Ever Asthma		atopic	wheeze.rec	5to14	13	normal/low	normal	High	Other	Low	Low																	Low	OR	0.35	0.29			0.35
Hetzner	2009	Early Child Longitudinal Study Birth Cohort	prospective cohort	prospective	Duration of exclusive breastfeeding	eBF	6	0	0	0to2	1	6		Asthma-Wheeze	Ever Asthma (DD)		atopic	wheeze.rec	0to4	2	normal/low	normal	Low	Low	Low	Low					OR				<0.001		OR	1.1	0.64	1.93			Low	OR			0.1	0.29	0.1
Rullo	2009	Rullo	prospective cohort	prospective	Duration of exclusive breastfeeding	eBF	<1	>=1	1	0to2	2	>=1		Asthma-Wheeze	recurrent wheezing		atopic	wheeze.rec	0to4	2.5	high	high	Unclear	Other	Low	Low					OR	0.14	0.004	0.54			OR	0.09	0.01	0.51			Low	OR	-1.97	0.69	-2.41	0.89	-2.41
Silva	2005	Silva, J.M., Sao Paulo-Brazil	prospective cohort	prospective	Duration of exclusive breastfeeding	eBF	<1	>=1	1	0to2	2	>=1		Asthma-Wheeze	Persistent wheezers (vs transient)		atopic	wheeze.rec	0to4	4	high	high	Unclear	Other	Low	Low					0.2	0.07	0.65		0.007		OR	0.12	0.02	0.63	0.013	adjusted Or is from table 3 and adjusted for sensitisation at baseline (model 1 in table)	Low	OR	-1.61	0.6	-2.12	0.85	-2.12
Salam	2003	Child Health's Study	nested case-control	prospective	Duration of exclusive breastfeeding	eBF	?4	<4	4	3to4	1	>=4		Asthma-Wheeze	Doctor-diagnosed Asthma		atopic	wheeze.rec	5to14	6TO18	normal/low	normal	Unclear	Other	Low	Low	111	163	121	280	OR						OR	1.34	0.88	2.04			Low	OR	0.45	0.16	0.29	0.21	0.29
Bacopoulou	2009	Bocopoulou, GREECE	prospective cohort	prospective	Duration of exclusive breastfeeding	eBF	<3	>=3	3	3to4	2	>=3		Asthma-Wheeze	Ever Asthma		atopic	wheeze.rec	5to14	7	normal/low	normal	Unclear	Other	Low	Low											OR	0.8	0.7	0.9	0.004	The results of the present study illustrated a protective role of breastfeeding, when practiced for at least three months, on lifetime asthma at 7 years, but not at 18 years.	Low	OR			-0.22	0.06	-0.22
Takemura	2002	The Tokorozawa Childhood Asthma and Pollinosis Study	CROSS SECTIONAL	retrospective	Duration of exclusive breastfeeding	eBF	<3	>=3	3	3to4	2	>=3		Asthma-Wheeze	Asthma		atopic	wheeze.rec	5to14	6TO15	normal/low	normal	Unclear	Other	Low	Low	992	1323	8620	12893	OR						OR						Low	OR	0.11	0.04			0.11
Prietsch	2006	Prietsch	cross-sectional	retrospective	breastfeeding	eBF	mixed feeding (not clearly defined in methods, but from the results section it transpires that it would be having breastfeeding and another form of milk consumption	being breastfed (reference) compared to mixed feeding	0	0to2	1	>0		wheeze	recurrent wheeze at present		atopic	wheeze.rec	5to14	13	normal/low	normal	unclear	Other	low	low	191				OR	1.68	0.97	2.91	0.01		OR	2.06	1.1	3.85			low	OR	0.52	0.28	0.72	0.32	0.72
Takemura	2002	The Tokorozawa Childhood Asthma and Pollinosis Study	CROSS SECTIONAL	retrospective	Duration of exclusive breastfeeding	eBF	0	>=3	0	0to2	2	>0		Asthma-Wheeze	Asthma		atopic	wheeze.rec	5to14	6TO15	normal/low	normal	Unclear	Other	Low	Low	992	357	8620	3759	OR						OR	1.198	1.054	1363			Low	OR	0.19	0.06	0.18	3.59	0.18
Van Asperen	1983	Van Asperen	prospective cohort	prospective	duration of exclusive breastfeeding	eBF	>=4	< 4	4	3to4	1	>=4		WHEEZE			atopic	wheeze	0to4	1	high	high	High	Other	Low	Low									NS	no significant difference							Low	OR	-0.47	0.63			-0.47
Miyake	2008	Osaka Maternal and Child Health Study (OMCHS)	prospective cohort	prospective	Duration of exclusive breastfeeding	eBF	< 4	>=4	4	3to4	2	>=4		Asthma-Wheeze	Wheeze.12mo		atopic	wheeze	0to4	2	normal/low	normal	High	Other	Low	Low					OR	1.08	0.77	1.52			OR	1.05	0.73	1.5			Low	OR	0.08	0.17	0.05	0.18	0.05
Elliott	2008	ALSPAC	prospective cohort	prospective	Duration of exclusive breastfeeding	eBF	0	?4	0	0to2	2	>=4		Asthma-Wheeze	Ever Wheeze		atopic	wheeze	0to4	3	normal/low	normal	Unclear	Other	Low	Low					OR	0.64	0.55	0.75			OR	0.83	0.7	0.98			Low	OR	-0.45	0.08	-0.19	0.08	-0.19
Giwercman	2010	Copenhagen Prospective Study on Asthma in Childhood (COPSAC)	prospective cohort	prospective	Duration of exclusive breastfeeding	eBF	0	>0	0	0to2	2	>0		Asthma-Wheeze	Ever Wheeze		atopic	wheeze	0to4	2	high	high	Unclear	Other	Low	Low											HR	0.67	0.48	0.96	0.021	Exclusive breast-feeding reduced the risk of wheezy episodes in the multivariate analysis adjusted for mothers smoking and age at start in day care (RR, 0.67; 95% CI 0.48-0.96; P 5 .021) without any further effect from duration of breast-feeding (P = .637).	Low	HR			-0.4	0.18	-0.4
Wilson	1998	Dundee infant feeding study	prospective cohort	prospective	Duration of exclusive breastfeeding	eBF	>=4	<4	4	3to4	1	>=4		Asthma-Wheeze	Ever Wheeze		atopic	wheeze	5to14	7	normal/low	normal	High	Other	Low	Low																	Low	OR	1	0.45			1
Nagel (Affluent countries)	2008	ISAAC Phase 2 - Affluent countries	CROSS SECTIONAL	retrospective	Duration of exclusive breastfeeding	eBF	0	?4	0	0to2	2	>=4		Asthma-Wheeze	Wheeze		atopic	wheeze	5to14	12	normal/low	normal	High	Other	Low	Low					OR	0.93	0.8	1.08			OR	0.92	0.78	1.1			Low	OR	-0.07	0.08	-0.08	0.09	-0.08
Nagel (Non Affluent countries)	2008	ISAAC Phase 2- Nonaffluent countries	CROSS SECTIONAL	retrospective	Duration of exclusive breastfeeding	eBF	0	?4	0	0to2	2	>=4		Asthma-Wheeze	Wheeze		atopic	wheeze	5to14	12	normal/low	normal	High	Other	Low	Low					OR	0.74	0.61	0.89			OR	0.74	0.61	0.9			Low	OR	-0.3	0.09	-0.3	0.1	-0.3
Erkkola	2012	DIPP (Type 1 Diabetes Prediction and Prevention Project)	prospective cohort	prospective	Duration of exclusive breastfeeding	eBF	1st third	2nd third	1	0to2	2	>=1		Asthma-Wheeze	Wheeze.12mo		atopic	wheeze	5to14	5	normal/low	normal	High	Other	Low	Low					chi square				0.153								Low	OR	-0.18	0.1			-0.18
Strassburger	2010	Strassburger, Sao Leopoldo Brazil	prospective cohort	prospective	duration of exclusive breastfeeding	eBF	>=4	<4	4	3to4	1	>=4		Asthma-Wheeze	WHEEZE		atopic	wheeze	0to4	3.5	normal/low	normal	Low	Low	Low	Low					OR	1.52	0.87	2.67	0.139		OR	1.33	0.73	2.41	0.341		Low	OR	0.42	0.29	0.29	0.3	0.29
Kull	2002	BAMSE	prospective cohort	prospective	Duration of exclusive breastfeeding	eBF	< 4	>= 4	4	3to4	2	>=4		Asthma-Wheeze	Ever Wheeze		atopic	wheeze	0to4	2	normal/low	normal	Low	Low	Low	Low											OR	0.78	0.65	0.93			Low	OR	-0.29	0.09	-0.25	0.09	-0.25
Linneberg	2006	Danish National Birth Cohort (DNBC)	prospective cohort	prospective	Duration of exclusive beastfeeding	eBF	<= 2	> 4	2	0to2	2	>=4		Asthma-Wheeze	Ever Wheeze		atopic	wheeze	0to4	1.5	normal/low	normal	Unclear	Other	Low	Low											OR	0.76	0.71	0.81			Low	OR			-0.27	0.03	-0.27
Kramer	2009	PROBIT	prospective cohort	prospective	Duration of exclusive breastfeeding	eBF	3	6	3	3to4	2	>=6		Asthma-Wheeze	Wheeze.12mo		atopic	wheeze	5to14	6.5	normal/low	normal	Low	Low	Low	Low											OR	0.8	0.4	1.6			Low	OR	-0.37	0.31	-0.22	0.35	-0.22
Oddy	2003	Western Australia Pregnancy Cohort	prospective cohort	prospective	Duration of exclusive breastfeeding	eBF	<2	>=2	2	0to2	2	>=2		Asthma-Wheeze	Ever Wheeze		atopic	wheeze	0to4	1	normal/low	normal	Unclear	Other	Low	Low					OR	1.7	1.32	2.1			OR	1.36	0.99	1.88			Low	OR	0.53	0.11	0.31	0.17	0.31
Elliott	2008	ALSPAC	prospective cohort	prospective	Duration of exclusive breastfeeding	eBF	0	?4	0	0to2	2	>=4		WHEEZE	Wheeze.12mo		atopic	wheeze	5to14	7.5	normal/low	normal	Unclear	Other	Low	Low					OR	0.83	0.62	1.1			OR	0.83	0.61	1.12			Low	OR	-0.19	0.14	-0.19	0.15	-0.19
Garcia-Marcos	2010	‘Estudio Internacional de Sibilancias en Lactantes’’ (EISL) (International Study of Wheezing in Infants)	CROSS SECTIONAL	retrospective	Duration of exclusive breastfeeding	eBF	?3	>3	3	3to4	2	>=3		Asthma-Wheeze	occasional wheeze (OW)		atopic	wheeze	0to4	1	normal/low	normal	High	Other	Low	Low					OR						OR	0.92	0.84	1.01			Low	OR			-0.08	0.05	-0.08
Tanaka	2009	Fukuoka Child Health Study	CROSS SECTIONAL	retrospective	Duration of exclusive breastfeeding	eBF	<4	?4	4	3to4	2	>=4		Asthma-Wheeze	Wheeze		atopic	wheeze	0to4	3	normal/low	normal	High	Other	Low	Low					OR	0.84	0.68	1.04			OR	0.84	0.68	1.05			Low	OR	-0.17	0.11	-0.17	0.11	-0.17
van der Voort	2012	GENERATION R STUDY	prospective cohort	prospective	Duration of exclusive breastfeeding	eBF	4	0	0	0to2	1	4		Asthma-Wheeze	Ever Wheeze		atopic	wheeze	0to4	1	normal/low	normal	Low	Low	Low	Low					OR	1.68	1.29	2.19								Analysesfocused on these symptoms per year showedthat childrenwho had been breastfed for shorter periods had increased risks of wheezing at 1, 2 and 3 yrs (p,0.05) (fig. 1a). A nonsignificant trend in the same directionwas observed at the age of 4 yrs.	Low	OR	0.52	0.14			0.52
Van Asperen	1983	Van Asperen	prospective cohort	prospective	duration of exclusive breastfeeding	eBF	>= 2	< 2	2	0to2	1	>=2		WHEEZE			atopic	wheeze	0to4	1	high	high	High	Other	Low	Low									NS	no significant difference							Low	OR	-0.57	0.52			-0.57
Watson	2013	Watson, New Zealand	prospective cohort	prospective	Duration of exclusive breastfeeding	eBF	<2	2	2	0to2	2	>=2		Asthma-Wheeze	Wheeze.12mo		atopic	wheeze	0to4	1.5	high	high	Low	Low	Low	Low					OR	0.6	0.36	1			OR	0.53	0.29	0.99			Low	OR	-0.51	0.26	-0.63	0.32	-0.63
Miyake	2003	Miyake, Osaka City	CROSS SECTIONAL	retrospective	Duration of exclusive breastfeeding	eBF	0	>=3	0	0to2	2	>=3		Asthma-Wheeze	WHEEZE		atopic	wheeze	ge15	15	normal/low	normal	High	Other	Low	Low					OR	1.01	0.69	1.54			OR	0.98	0.66	1.5			Low	OR	0.01	0.22	-0.02	0.22	-0.02
Ehlayel	2008	Hamad Medical Corportation, Qatar	CROSS SECTIONAL	retrospective	Duration of exclusive breastfeeding	eBF	?6	<6	6	ge5	1	>=6		Asthma-Wheeze	Wheeze		atopic	wheeze	5to14	5	normal/low	low	High	Other	Low	Low					OR	1.44	1.04	2	0.024								Low	OR	0.36	0.17			0.36
Oddy	2003	Western Australia Pregnancy Cohort	prospective cohort	prospective	Duration of exclusive breastfeeding	eBF	<4	>=4	4	3to4	2	>=4		Asthma-Wheeze	Ever Wheeze		atopic	wheeze	0to4	1	normal/low	normal	Unclear	Other	Low	Low					OR	1.96	1.49	2.56			OR	1.7	1.25	2.3			Low	OR	0.67	0.14	0.53	0.15	0.53
Cano Garcinuno	2003	Cano Garcinuno	cross-sectional	retrospective	Breastfeeding for at least 3 months	eBF	Breastfeeing for less than 3 months	Exclusive breastfeeding for at least 3 months	3	3to4	2	>=3		Asthma-Wheeze	1 episode of wheeze		atopic	wheeze	0to4	3	normal/low	normal	Unclear	Other	Low	Low					HR	1.1	0.61	2.63			HR	0.83	0.42	1.64			Low	HR	0.1	0.44	-0.19	0.35	-0.19
Oddy	2003	Western Australia Pregnancy Cohort	prospective cohort	prospective	Duration of exclusive breastfeeding	eBF	<6	>=6	6	ge5	2	>=6		Asthma-Wheeze	Ever Wheeze		atopic	wheeze	0to4	1	normal/low	normal	Unclear	Other	Low	Low					OR	1.67	1.22	2.38			OR	2.07	1.47	2.9			Low	OR	0.51	0.18	0.73	0.17	0.73
Virtanen	1992	Childhood Diabetes in Finland	case control	retrospective		eBF	0-3	3+	3	3to4	2	>=3		DM	Medical diagnosis	TIDM	autoim	TIDM	auto	7TO14	normal/low	normal	Low	Low	Low	Low											OR	0.63	0.43	0.93			Low	OR			-0.46	0.2	-0.46
Patterson	1994	Patterson, C. C.	case control	retrospective	Exclusive BF and no artificial feeds at 2wk	eBF	Not exclusive BF 2wk	Exclusive BF at 2wk	0	0to2	2	>0		DM	Medical diagnosis	TIDM	autoim	TIDM	auto	<16	normal/low	normal	Unclear	Other	Low	Low	48	202	260	995	OR	0.89	0.63	1.26			OR	0.73	0.5	1.05			Low	OR	-0.12	0.18	-0.31	0.19	-0.31
Stene	2003	Norwegian Childhood Diabetes Study Group	case control	retrospective		eBF	0.5-3	3.5-6	3	3to4	2	3.5-6		DM	Medical diagnosis	TIDM	autoim	TIDM	auto	9	normal/low	normal	High	Other	Low	Low	558		226		OR	0.653595	0.531915	0.806452			OR	0.588235	0.42735	0.806452			Low	OR	-0.43	0.11	-0.53	0.16	-0.53
Verge	1994	Verge, C. F.	case control	retrospective	Exclusive BF duration	eBF	0-3	3+	3	3to4	2	>=3		DM	Medical diagnosis	TIDM	autoim	TIDM	auto	9	normal/low	normal	High	Other	Low	Low	102	114	153	105	OR	0.61	0.43	0.88			OR	0.66	0.45	0.97			Low	OR	-0.49	0.19	-0.42	0.2	-0.42
Esfarjani	2001	Esfarjani, F.	case control	retrospective	Exclusive BF duration	eBF	0-3	3+	3	3to4	2	>=3		DM	Medical diagnosis	TIDM	autoim	TIDM	auto	<14	normal/low	normal	High	Other	Low	Low	32	20	31	21	OR	1.08387											Low	OR	0.08	0.4			0.08
Sadauskaite-Kuehne (Sweden)	2004	DEBS (Diaberes and Environment at the Baltic Sea)	case control	retrospective	Total BF duration	eBF	0-5	5+	5	ge5	2	>=5		DM	Medical diagnosis	TIDM	autoim	TIDM	auto	7	normal/low	normal	High	Other	Low	Low	165		349		OR	0.61	0.43	0.88			OR	0.54	0.36	0.81			Low	OR			-0.62	0.21	-0.62
Sadauskaite-Kuehne (Lithuania)	2004	DEBS (Diaberes and Environment at the Baltic Sea)	case control	retrospective	Exclusive BF duration	eBF	0-2	2+	2	0to2	2	>=2		DM	Medical diagnosis	TIDM	autoim	TIDM	auto	7	normal/low	normal	High	Other	Low	Low	81		221		OR	0.59	0.3	0.98			OR	0.58	0.34	0.99			Low	OR			-0.54	0.27	-0.54
Rabiei	2011	Rabiei	case control	retrospective	Exclusive BF	eBF	0-4	4+	4	3to4	2	>=4		DM	DMT1	TIDM	autoim	TIDM	auto	11	normal/low	normal	Unclear	Other	Low	Low	80	20	175	25	No data on unadjusted measures						OR	0.178571	0.0505051	0.632911			Low	OR	-0.56	0.33	-1.72	0.65	-1.72
Gimeno	1997	Gimeno, S. D.	case control	retrospective	Total BF duration	eBF	0-2	2+	2	0to2	2	>=2		DM	Medical diagnosis	TIDM	autoim	TIDM	auto	<18	normal/low	normal	Unclear	Other	Low	Low											OR	0.78125	0.578035	1.05263			Low	OR			-0.25	0.15	-0.25
Ziegler	2003	German BABYDIAB	prospective cohort	prospective	Exclusive BF duration	eBF	0.1-3	3.1-6	3	3to4	2	3TO6		DM	IAA, GADA or IA2 >99th percentile	TIDM-Ab	autoim	TIDM	auto	5	high	high	Low	Low	Low	Low					Hazard ratio	1.11111	0.625	2			Hazard ratio	1	0.6	1.7	0.93		Low	HR	0.11	0.3	0	0.27	0
Virtanen	2011	The DIPP Nutrition Study	prospective cohort	prospective	Excluisve BF duration	eBF	0.69-3	3+	3	3to4	2	>=3		DM	Advanced beta cell autoimmunity defeined as being positive for ICA plus at elast one antibody endpoint (IAA, GADA, IA2A) OR clinical T1DM.	TIDM-Ab	autoim	TIDM	auto	6-18	high	high	Low	Low	Low	Low											HR	0.740741	0.529101	1.03093			Low	HR	-0.2	0.17	-0.3	0.17	-0.3
Ziegler	2003	German BABYDIAB	prospective cohort	prospective	Exclusive BF duration	eBF	0	3.1-6	0	0to2	2	3TO6		DM	IAA, GADA or IA2 >99th percentile	TIDM-Ab	autoim	TIDM	auto	5	high	high	Low	Low	Low	Low					Hazard ratio	1.42857	0.833333	2.5			Hazard ratio	1.42857	0.769231	2.5	0.35	overall p=.5	Low	HR	0.36	0.29	0.36	0.29	0.36
Virtanen	2011	The DIPP Nutrition Study	prospective cohort	prospective	Excluisve BF duration	eBF	0-0.69	3+	0	0to2	2	>=3		DM	Advanced beta cell autoimmunity defeined as being positive for ICA plus at elast one antibody endpoint (IAA, GADA, IA2A) OR clinical T1DM.	TIDM-Ab	autoim	TIDM	auto	6-18	high	high	Low	Low	Low	Low											HR	0.694444	0.487805	0.990099	0.091		Low	HR	-0.25	0.18	-0.36	0.18	-0.36
Couper	2009	Australian BABYDIAB	prospective cohort	prospective	Excluisve BF duration	eBF	0-3	3+	3	3to4	2	>=3		DM	Islet autoimmunity defined as persistent elevation of one or more islet autoantibodies on consecutive 6 month tests.	TIDM-Ab	autoim	TIDM	auto	1.7	high	high	High	Other	Low	Low					HR	0.892857	0.406504	1.96078		OVERL ALL P VALUE INCLUDING UNKNOW/MISSING EXPOSURES WHO WERE ANALYZED						it says adjusted analyses was done - no results shown	Low	HR	-0.11	0.4			-0.11
Couper	2009	Australian BABYDIAB	prospective cohort	prospective	Excluisve BF duration	eBF	0	3+	0	0to2	2	>=3		DM	Islet autoimmunity defined as persistent elevation of one or more islet autoantibodies on consecutive 6 month tests.	TIDM-Ab	autoim	TIDM	auto	1.7	high	high	High	Other	Low	Low					HR	1.05263	0.452489	2.5	0.94	OVERL ALL P VALUE INCLUDING UNKNOW/MISSING EXPOSURES WHO WERE ANALYZED						it says adjusted analyses was done - no results shown	Low	HR	0.05	0.44			0.05
Wahlberg	2006	ABIS (All Babies in Southeast Sweden)	prospectvie cohort	prospective	Exclusive BF durtion	eBF	0-2	3+	3	3to4	2	>=3		DM	GADA and/or IA2A at 1 and 2 yo	TIDM-Ab	autoim	TIDM	auto	2	normal/low	normal	High	Other	Low	Low					OR	0.34	0.13	0.91	0.04							variables did not remained in the step-wise logistic regression	Low	OR	-1.06	0.49			-1.06
Wahlberg	2006	ABIS (All Babies in Southeast Sweden)	prospectvie cohort	prospective	Exclusive BF durtion	eBF	0-5	5+	5	ge5	2	>=5		DM	GADA and/or IA2A at 1 and 2 yo	TIDM-Ab	autoim	TIDM	auto	2	normal/low	normal	High	Other	Low	Low																variables did not remained in the step-wise logistic regression	Low	OR	0.36	0.37			0.36
Wahlberg	2006	ABIS (All Babies in Southeast Sweden)	prospectvie cohort	prospective	Exclusive BF durtion	eBF	0-1	2+	2	0to2	2	>=2		DM	GADA and/or IA2A at 1 and 2 yo	TIDM-Ab	autoim	TIDM	auto	2	normal/low	normal	High	Other	Low	Low																variables did not remained in the step-wise logistic regression	Low	OR	-0.87	0.46			-0.87
Paton	2012	ACT Kindergarten Health Check	CROSS SECTIONAL	retrospective	Exclusive BF	eBF	<6	6+	6	ge5	2	>=6		FOOD ALLERGY	parent reported nut allergy		atopic	FA-NUTS-PEANUTS	5to14	7	normal/low	normal	High	Other	Low	Low	232		4415								OR	1.43	1.21	1.69	0	Adjusted for age and sex where appropriate	Low	OR			0.36	0.09	0.36
Arshad	1992	Isle of Wight Prevention Study	prospective cohort	prospective	Duration of exclusive breastfeeding	eBF	<3	3	3	3to4	2	>=3		Food Allergy	FA.12mo		atopic	FA-ANY	0to4	1	normal/low	normal	High	Other	Low	Low																	Low	OR	0.26	0.23			0.26
Ehlayel	2008	Hamad Medical Corportation, Qatar	CROSS SECTIONAL	retrospective	Duration of exclusive breastfeeding	eBF	?6	<6	6	ge5	1	>=6		Food Allergy	Allergy to foods		atopic	FA-ANY	5to14	5	normal/low	low	High	Other	Low	Low					OR	1.47	1.28	1.69	0.001								Low	OR	0.39	0.07			0.39
Kull	2002	BAMSE	prospective cohort	prospective	Duration of exclusive breastfeeding	eBF	< 4	>= 4	4	3to4	2	>=4		Food Allergy	Ever FA-any		atopic	FA-ANY	0to4	2	normal/low	normal	Unclear	Other	Low	Low											OR	0.91	0.75	1.1			Low	OR	-0.09	0.1	-0.09	0.1	-0.09
Kim	2011	Kim, Korea	prospective cohort	prospective	Duration of exclusive breastfeeding	eBF	>=6	<6	6	ge5	1	>=6		Food Allergy	ANY		atopic	FA-ANY	0to4	1	normal/low		Unclear	Other	Low	Low					OR				0.739	duration of exclusive BF, age at the introduction to solid foods, were not found to be related to the development of FA in infancy according to univariate and multivariate analyses.	OR	1.02	0.55	1.88	0.953	duration of exclusive BF, age at the introduction to solid foods, were not found to be related to the development of FA in infancy according to univariate and multivariate analyses.	Low	OR	0.1	0.3	0.02	0.31	0.02
Pesonen	2006	Pesonen	prospective cohort	prospective	Duration of exclusive breastfeeding	eBF	<9	>=9	9	ge5	2	>=9		Food Allergy	any		atopic	FA-ANY	5to14	5	normal/low	normal	Unclear	Other	Low	Low					OR	3.3	1.2	9	0.02		OR	2.5	0.8	7.6	0.11		Low	OR	1.19	0.51	0.92	0.57	0.92
Pesonen	2006	Pesonen	prospective cohort	prospective	Duration of exclusive breastfeeding	eBF	<2	2- <6	2	0to2	2	>=2		Food Allergy	any		atopic	FA-ANY	5to14	5	normal/low	normal	Unclear	Other	Low	Low																	Low	OR	0.65	0.78			0.65
Greco	1988	Greco, L.	CASE CONTROL	retrospective	Duration of exclusive breastfeeding	eBF	<3	>3	3	3to4	2	>=3		CD		CD	autoim	CD	auto	2	normal/low	normal	High	Other	Low	Low	38	163	1047	902	OR	0.201207	0.144928	0.285714	<0.0001								Low	OR	-1.6	0.18			-1.6
Ziegler	2003	German BABYDIAB	prospective cohort	prospective	Exclusive BF duration	eBF	0.1-3	3.1-6	3	3to4	2	3TO6		CD	IgA-Ttgca	CD-Ab	autoim	CD	auto	5	high	high	Low	Low	Low	Low					Hazard ratio	0.909091	0.322581	2.5			Hazard ratio	0.833333	0.285714	2.5			Low	HR	-0.1	0.52	-0.18	0.56	-0.18
Ziegler	2003	German BABYDIAB	prospective cohort	prospective	Exclusive BF duration	eBF	0	3.1-6	0	0to2	2	3TO6		CD	IgA-Ttgca	CD-Ab	autoim	CD	auto	5	high	high	Low	Low	Low	Low					Hazard ratio	1	0.357143	2.5			Hazard ratio	1	0.357143	2.5			Low	HR	0	0.47	0	0.47	0
Elliott	2008	ALSPAC	prospective cohort	prospective	Duration of exclusive breastfeeding	eBF	0	?4	0	0to2	2	>=4		BHR	BHR	LF-PC20(FEV1)	atopic	BHR	5to14	8	normal/low	normal	Unclear	Other	Low	Low					OR	0.83	0.58	1.18			OR	0.87	0.61	1.26			Low	OR	-0.19	0.18	-0.14	0.19	-0.14
Siltanen	2003	Saarinen KM, 1999 (#1282)	prospective cohort (of RCT)	prospective	duration of exclusive breastfeeding	eBF	<3	>=3	3	3to4	2	>=3		Rhinoconjunctivits	Allergic rhino-conjunctivitis		atopic	AR	0to4	4	normal/low	normal	High	Other	Low	Low																	Low	OR	-0.5	0.31			-0.5
Strachan	1996	Sheffield Child Development Study	prospective cohort	prospective	Duration of exclusive breastfeeding	eBF	<1	1	1	0to2	2	>=1		Rhinoconjunctivits	hay fever		atopic	AR	ge15	16	normal/low	normal	High	Other	Low	Low											OR						Low	OR	0.12	0.09			0.12
Erkkola	2012	DIPP (Type 1 Diabetes Prediction and Prevention Project)	prospective cohort	prospective	Duration of exclusive breastfeeding	eBF	1st third	3rd third	1	0to2	2	>=3		Rhinoconjunctivits	AR.12mo		atopic	AR	5to14	5	normal/low	normal	High	Other	Low	Low					chi square												Low	OR	-0.3	0.14			-0.3
Kramer	2009	PROBIT	prospective cohort	prospective	Duration of exclusive breastfeeding	eBF	3	6	3	3to4	2	>=6		Rhinoconjunctivits	AR.12mo		atopic	AR	5to14	6.5	normal/low	normal	Low	Low	Low	Low									NS		OR	1.3	0.8	2			Low	OR	-0.18	0.28	0.26	0.22	0.26
Van Asperen	1983	Van Asperen	prospective cohort	prospective	duration of exclusive breastfeeding	eBF	>=4	< 4	4	3to4	1	>=4		RHINOCONJUNCTIVITIS			atopic	AR	0to4	1	high	high	High	Other	Low	Low									NS	no significant difference							Low	OR	0.41	0.54			0.41
Arshad	1992	Isle of Wight Prevention Study	prospective cohort	prospective	Duration of exclusive breastfeeding	eBF	<3	3	3	3to4	2	>=3		Rhinoconjunctivits	AR.12mo		atopic	AR	0to4	1	normal/low	normal	High	Other	Low	Low																	Low	OR	0.28	0.34			0.28
Van Asperen	1983	Van Asperen	prospective cohort	prospective	duration of exclusive breastfeeding	eBF	>= 2	< 2	2	0to2	1	>=2		RHINOCONJUNCTIVITIS			atopic	AR	0to4	1	high	high	High	Other	Low	Low									NS	no significant difference							Low	OR	0.45	0.49			0.45
Miyake	2003	Miyake, Osaka City	CROSS SECTIONAL	retrospective	Duration of exclusive breastfeeding	eBF	0	>=3	0	0to2	2	>=3		Rhinoconjunctivits			atopic	AR	ge15	15	normal/low	normal	High	Other	Low	Low	567	87	1820	338	OR	1.21	0.94	1.57			OR	1.07	0.83	1.4			Low	OR	0.19	0.13	0.07	0.14	0.07
Ehlayel	2008	Hamad Medical Corportation, Qatar	CROSS SECTIONAL	retrospective	Duration of exclusive breastfeeding	eBF	?6	<6	6	ge5	1	>=6		Rhinoconjunctivits	Allergic rhinitis		atopic	AR	5to14	5	normal/low	low	High	Other	Low	Low					OR	1.79	1.38	3.31	0.0001								Low	OR	0.58	0.31			0.58
Kull	2002	BAMSE	prospective cohort	prospective	Duration of exclusive breastfeeding	eBF	< 4	>= 4	4	3to4	2	>=4		Rhinoconjunctivits	Ever AR		atopic	AR	0to4	2	normal/low	normal	Unclear	Other	Low	Low											OR	0.73	0.54	0.99			Low	OR	-0.38	0.15	-0.31	0.16	-0.31
Kull	2005	BAMSE	prospective cohort	prospective	Duration of exclusive breastfeeding	eBF	< 4	>= 4	4	3to4	2	>=4		AD	NON ATOPIC AD		atopic	AD-non atopic	0to4	4	normal/low	normal	Unclear	Other	Low	Low											OR	0.77	0.56	1.05			Low	OR	-0.25	0.15	-0.26	0.16	-0.26
Kull	2009	BAMSE	prospective cohort	prospective	Duration of exclusive breastfeeding	eBF	< 4	>= 4	4	3to4	2	>=4		AD	NON ATOPIC AD		atopic	AD-non atopic	5to14	8	normal/low	normal	Unclear	Other	Low	Low											OR	0.7	0.49	1			Low	OR			-0.36	0.18	-0.36
Cogswell	1987	Cogswell	prospective cohort	prospective	Duration of exclusive breastfeeding	eBF	<=1	>3.5	1	0to2	2	>1		AD	ATOPIC AD		atopic	AD-atopic	5to14	5	high	high	High	Other	Low	Low																	Low	OR	0.41	0.53			0.41
Kull	2005	BAMSE	prospective cohort	prospective	Duration of exclusive breastfeeding	eBF	< 4	>= 4	4	3to4	2	>=4		AD	ATOPIC AD		atopic	AD-atopic	0to4	4	normal/low	normal	Unclear	Other	Low	Low											OR	0.79	0.39	1.21			Low	OR	-0.21	0.23	-0.24	0.22	-0.24
Kull	2009	BAMSE	prospective cohort	prospective	Duration of exclusive breastfeeding	eBF	< 4	>= 4	4	3to4	2	>=4		AD	ATOPIC AD		atopic	AD-atopic	5to14	8	normal/low	normal	Unclear	Other	Low	Low											OR	0.94	0.66	1.34			Low	OR			-0.06	0.18	-0.06
Fergusson	1982	Chirstchurch Child Development Study	prospective cohort	prospective	Duration of exclusive breastfeeding	eBF	<4	4	4	3to4	2	4		AD	Ever AD		atopic	AD	0to4	1	normal/low	normal	High	Other	Low	Low																They only report OR and p-value. table 4 In addition based on the grouping we used we cannot use the adj analyses as in tabl34	Low	OR	-0.21	0.38			-0.21
Wang	2007	Tiawan Nationation Birth Cohort Study	prospective cohort	prospective	Total BF duration	eBF	<3 months	3+	3	3to4	2	>=3		AD			atopic	AD	0to4	0.5	normal/low	normal	High	Other	Low	Low																	Low	OR	-0.24	0.33			-0.24
Jedrychowski	2011	JEDRYCHOWSKI, W	prospective cohort	prospective	Duration of exclusive breastfeeding	eBF	<=3	>3	3	3to4	2	>=3		AD			atopic	AD	0to4	1	normal/low	normal	High	Other	Low	Low									0.654							INCLUDED AS CONFOUNDER IN MULTIVARIATE MODEL BUT NOT REPORTED	Low	OR	0.1	0.19			0.1
Miyake	2009	Osaka Maternal and Child Health Study (OMCHS)	prospective cohort	prospective	Duration of exclusive breastfeeding	eBF	< 4	>=4	4	3to4	2	>=4		AD	Ever AD		atopic	AD	0to4	2	normal/low	normal	High	Other	Low	Low					OR	1.24	0.86	1.78			OR	1.23	0.84	1.81			Low	OR	0.22	0.18	0.21	0.2	0.21
Siltanen	2003	Saarinen KM, 1999 (#1282)	prospective cohort (of RCT)	prospective	duration of exclusive breastfeeding	eBF	<3	>=3	3	3to4	2	>=3		AD			atopic	AD	0to4	4	normal/low	normal	High	Other	Low	Low																	Low	OR	0.14	0.24			0.14
Giwercman	2010	Copenhagen Prospective Study on Asthma in Childhood (COPSAC)	prospective cohort	prospective	Duration of exclusive breastfeeding	eBF	0	>0	0	0to2	2	>0		AD	Ever AD		atopic	AD	0to4	2	high	high	Unclear	Other	Low	Low											HR	2.09	1.15	3.8	0.016	The effect of exclusive breast-feeding on the risk of development of eczema was significant after adjustment for demographics, filaggrin variants R501X and 2282del4 status, parents’ eczema, and pets at home (RR, 2.09; 95% CI 1.15-3.80; P = .016). In addition, there was a significant effect of duration of exclusive breast-feeding (P5.0430), because theRRof eczemawas increasing with increasing dura…	Low	HR			0.74	0.31	0.74
Benn	2004	Danish National Birth Cohort	prospective cohort	prospective	Duration of exclusive breastfeeding	eBF	<4	>=4	4	3to4	2	>=4		AD	Ever AD		atopic	AD	0to4	1.5	normal/low	normal	Low	Low	Low	Low											HR	1.12	0.98	1.28			Low	HR			0.11	0.07	0.11
Linneberg	2006	Danish National Birth Cohort (DNBC)	prospective cohort	prospective	Duration of exclusive beastfeeding	eBF	<= 2	> 4	2	0to2	2	>=4		AD	Ever AD		atopic	AD	0to4	1.5	normal/low	normal	Unclear	Other	Low	Low											OR	1.12	1	1.25			Low	OR			0.11	0.06	0.11
Pesonen	2006	Pesonen	prospective cohort	prospective	Duration of exclusive breastfeeding	eBF	<9	>=9	9	ge5	2	>=9		AD			atopic	AD	ge15	20	normal/low	normal	Low	Low	Low	Low					OR	1.9	0.8	4.6	0.13		OR	1.2	0.4	0.5			Low	OR	0.64	0.45	0.18	0.55	0.18
Pesonen	2006	Pesonen	prospective cohort	prospective	Duration of exclusive breastfeeding	eBF	<2	2- <6	2	0to2	2	>=2		AD			atopic	AD	ge15	20	normal/low	normal	Low	Low	Low	Low																	Low	OR	0.36	0.59			0.36
Mihrshahi	2007	Childhood ASTHMA Prevention Study (CAPS)	prospective cohort	prospective	Duration of exclusive breastfeeding	eBF	<3	3	3	3to4	2	>=3		AD	Ever AD		atopic	AD	5to14	5	high	high	Low	Low	Low	Low					OR	1.72	1.12	2.65			OR	1.52	0.96	2.4			Low	OR	0.54	0.22	0.42	0.23	0.42
Kramer	2009	PROBIT	prospective cohort	prospective	Duration of exclusive breastfeeding	eBF	3	6	3	3to4	2	>=6		AD	recurrent itchy rash		atopic	AD	5to14	6.5	normal/low	normal	Low	Low	Low	Low									NS		OR	1.1	0.9	1.3			Low	OR	0.05	0.22	0.1	0.09	0.1
Pesonen	2006	Pesonen	prospective cohort	prospective	Duration of exclusive breastfeeding	eBF	<9	>=9	9	ge5	2	>=9		AD			atopic	AD	5to14	5	normal/low	normal	Low	Low	Low	Low					OR	3.8	1.6	9.3	0.002		OR	3	1.1	8.3	0.03		Low	OR	1.34	0.46	1.1	0.52	1.1
Pesonen	2006	Pesonen	prospective cohort	prospective	Duration of exclusive breastfeeding	eBF	<2	2- <6	2	0to2	2	2TO6		AD			atopic	AD	5to14	5	normal/low	normal	Low	Low	Low	Low																	Low	OR	-0.19	0.76			-0.19
Purvis	2005	Auckland Birthweight Collaborative study	prospective cohort	prospective	Duration of exclusive breastfeeding	eBF	0	? 6	0	0to2	2	>=6		AD	AD.12mo		atopic	AD	0to4	3.5	normal/low	normal	High	Other	Low	Low					OR	8.58	2.7	33.48								for adjusted they only used total bf </>6 most likely because excl. and total unadjusted effects were similar	Low	OR	2.15	0.69			2.15
Van Asperen	1983	Van Asperen	prospective cohort	prospective	duration of exclusive breastfeeding	eBF	>=4	< 4	4	3to4	1	>=4		AD			atopic	AD	0to4	1	high	high	High	Other	Low	Low									NS	no significant difference							Low	OR	0.52	0.53			0.52
Ludvigsson	2005	ABIS	prospective cohort	prospective	Duration of exclusive breastfeeding	eBF	>=4	<4	4	3to4	1	>=4		AD	any atopic dermatitis		atopic	AD	0to4	1	normal/low	normal	High	Other	Low	Low					OR	1.03	0.91	1.17			OR	1.07	0.94	1.21			Low	OR	0.03	0.07	0.07	0.06	0.07
Dunlop	2006	Slovak birth cohort	prospective cohort	prospective	Duration of exclusive breast feeding	eBF	<4	>=4	4	3to4	2	>=4		AD			atopic	AD	0to4	1	normal/low	normal	High	Other	Low	Low					OR	0.3	0.1	0.8									Low	OR	-1.2	0.5			-1.2
Arshad	1992	Isle of Wight Prevention Study	prospective cohort	prospective	Duration of exclusive breastfeeding	eBF	<3	3	3	3to4	2	>=3		AD	AD.12mo		atopic	AD	0to4	1	normal/low	normal	High	Other	Low	Low																	Low	OR	0.21	0.19			0.21
Tanaka	2009	Fukuoka Child Health Study	CROSS SECTIONAL	retrospective	Duration of exclusive breastfeeding	eBF	<4	?4	4	3to4	2	>=4		AD			atopic	AD	0to4	3	normal/low	normal	High	Other	Low	Low					OR	0.9	0.71	1.13			OR	0.9	0.71	1.15			Low	OR	-0.11	0.12	-0.11	0.13	-0.11
Van Asperen	1983	Van Asperen	prospective cohort	prospective	duration of exclusive breastfeeding	eBF	>= 2	< 2	2	0to2	1	>=2		AD			atopic	AD	0to4	1	high	high	High	Other	Low	Low									NS	no significant difference							Low	OR	0.48	0.49			0.48
Miyake	2003	Miyake, Osaka City	CROSS SECTIONAL	retrospective	Duration of exclusive breastfeeding	eBF	0	>=3	0	0to2	2	>=3		AD	Atopic eczema		atopic	AD	ge15	15	normal/low	normal	High	Other	Low	Low					OR	1.67	1.21	2.36			OR	1.56	1.13	2.22			Low	OR	0.51	0.18	0.44	0.18	0.44
Ehlayel	2008	Hamad Medical Corportation, Qatar	CROSS SECTIONAL	retrospective	Duration of exclusive breastfeeding	eBF	?6	<6	6	ge5	1	>=6		AD			atopic	AD	5to14	5	normal/low	low	High	Other	Low	Low					OR	1.58	1.2	2.07	0.0001								Low	OR	0.46	0.14			0.46
Cogswell	1987	Cogswell	prospective cohort	prospective	Duration of exclusive breastfeeding	eBF	<=1	>3.5	1	0to2	2	>1		AD	Ever AD		atopic	AD	5to14	5	high	high	High	Other	Low	Low																	Low	OR	-0.07	0.58			-0.07
Moore	2004	PROJECT VIVA	prospective cohort	prospective	Duration of exclusive breastfeeding	eBF	>=3	<3	3	3to4	1	>=3		AD	Ever AD		atopic	AD	0to4	6.5	normal/low		Unclear	Other	Low	Low					OR	1.06	0.75	1.5							ns	infant feeding...none of these variables were associated with atopic dermatitis in multivariate models (data not shown). (page 740 2nd column)	Low	OR	0.06	0.18			0.06
Kull	2002	BAMSE	prospective cohort	prospective	Duration of exclusive breastfeeding	eBF	< 4	>= 4	4	3to4	2	>=4		AD	Ever AD		atopic	AD	0to4	2	normal/low	normal	Unclear	Other	Low	Low											OR	0.85	0.71	1			Low	OR	-0.13	0.09	-0.16	0.08	-0.16
Kerkhof	2003	PIAMA	prospective cohort	prospective	Duration of exclusive breastfeeding	eBF	<=3	>3	3	3to4	2	>=3		AD	AD.12mo		atopic	AD	0to4	1	normal/low	normal	Unclear	Other	Low	Low					OR				NS		OR	0.6	0.3	1.2	NS		Low	OR			-0.51	0.35	-0.51
Sahakyan	2006	Sahakyan, A.	CASE CONTROL	retrospective	Duration of exclusive breastfeeding	eBF	?6	<6	6	ge5	1	>=6		AD			atopic	AD	5to14	7	normal/low	low	Unclear	Other	Low	Low					OR						OR	2	0.9	4.5	0.08		Low	OR			0.69	0.41	0.69
Moore	2004	PROJECT VIVA	prospective cohort	prospective	Duration of exclusive breastfeeding	eBF	>=6	<6	6	ge5	1	>=6		AD	Ever AD		atopic	AD	0to4	0.5	normal/low		Unclear	Other	Low	Low					OR	0.96	0.64	1.43							ns	infant feeding...none of these variables were associated with atopic dermatitis in multivariate models (data not shown). (page 740 2nd column)	Low	OR	-0.04	0.2			-0.04
Moore	1985	Moore	prospective cohort (of RCT)	prospective	DURATION OF EXCLUSIVE BF	eBF	<1	>=1	1	0to2	2	>=1		AD	eczema at 3 months		atopic	AD	0to4	0.25	high	high	Low	Low	Low	Low																	Low	OR	-0.55	0.26			-0.55
Kull	2009	BAMSE	prospective cohort	prospective	Duration of exclusive breastfeeding	eBF	< 4	>= 4	4	3to4	2	>=4		AD	AD.12mo		atopic	AD	5to14	8	normal/low	normal	Unclear	Other	Low	Low											OR	0.89	0.77	1.03			Low	OR			-0.12	0.07	-0.12
Peters	1987	British Cohort Study (BCS70)	prospective cohort	prospective	Duration of exclusive breastfeeding	eBF	>=0.25	<0.25	0	0to2	1	>0		AD	Ever AD		atopic	AD	5to14	5	normal/low	normal	Unclear	Other	Low	Low																	Low	OR	-0.18	0.08			-0.18
Flohr	2011	ISAAC Phase 2	CROSS SECTIONAL	retrospective	Duration of exclusive breastfeeding	eBF	0	>4	0	0to2	2	>=4		AD	Eczema Ever		atopic	AD	5to14	12	normal/low	normal	Unclear	Other	Low	Low					OR						OR	1.05	0.89	1.24			Low	OR			0.05	0.08	0.05
Siltanen	2003	Saarinen KM, 1999 (#1282)	prospective cohort (of RCT)	prospective	duration of exclusive breastfeeding	eBF	<3	>=3	3	3to4	2		>=3	Allergic Sensitization	Total IgE		atopic	Total IgE	0to4	4	normal/low	normal	High	Other	Low	Low																	Low	OR	0.26	0.29			0.26
Kull	2004	BAMSE	prospective cohort	prospective	Duration of exclusive breastfeeding	eBF	<=2	=>5	2	0to2	2		>=5	Allergic Sensitization	IgE-aeroallergen	sIgE-AEROALLERGEN	atopic	AEROALLERGEN	0to4	4	normal/low	normal	Low	Low	Low	Low											OR	0.93	0.7	1.22			Low	OR			-0.07	0.14	-0.07
Nwaru	2010	DIPP (Type 1 Diabetes Prediction and Prevention Project)	prospective cohort	prospective	Duration of exclusive breastfeeding	eBF	<0.92	> 3.0	1	0to2	2		>=3	Allergic Sensitization	IgE-aeoallergen	sIgE-AEROALLERGEN	atopic	AEROALLERGEN	5to14	5	normal/low	normal	Low	Low	Low	Low					OR	1.29	0.9	1.84			OR	1.3	0.85	1.98			Low	OR	0.25	0.18	0.26	0.21	0.26
Kull	2010	BAMSE	prospective cohort	prospective	Duration of exclusive breastfeeding	eBF	< 4	>= 4	4	3to4	2		>=4	Allergic Sensitization	IgE-aeroallergen	sIgE-AEROALLERGEN	atopic	AEROALLERGEN	5to14	8	normal/low	normal	Low	Low	Low	Low											OR	0.81	0.63	1.03			Low	OR			-0.21	0.12	-0.21
Sears	2002	Dunedin Multidisciplinary Health and Development Research Study	prospective cohort	prospective	Duration of exclusive breastfeeding	eBF	<3	>=3	3	3to4	2		>=3	Allergic Sensitization	SPT-any	SPT-AEROALLERGEN	atopic	AEROALLERGEN	5to14	13	normal/low	normal	Unclear	Other	Low	Low					OR	1.55	1.13	2.12			OR	1.94	1.42	2.65			Low	OR	0.44	0.16	0.66	0.16	0.66
Kramer	2009	PROBIT	prospective cohort	prospective	Duration of exclusive breastfeeding	eBF	3	6	3	3to4	2		>=6	Allergic Sensitization	SPT-any	SPT-AEROALLERGEN	atopic	AEROALLERGEN	5to14	6.5	normal/low	normal	Low	Low	Low	Low									NS		OR	1.1	0.8	1.3			Low	OR	0.19	0.1	0.1	0.09	0.1
Strassburger	2010	Strassburger, Sao Leopoldo Brazil	prospective cohort	prospective	duration of exclusive breastfeeding	eBF	>=6	<6	6	ge5	1		>=6	ALLERGIC SENSITISATION	SPT-common	SPT-AEROALLERGEN	atopic	AEROALLERGEN	0to4	3.5	normal/low	normal	Low	Low	Low	Low					OR	1.72	1.05	2.81	0.028		OR	1.61	0.94	2.75	0.077		Low	OR	0.54	0.25	0.48	0.27	0.48
Cogswell	1987	Cogswell	prospective cohort	prospective	Duration of exclusive breastfeeding	eBF	<=1	>3.5	1	0to2	2		>1	Allergic Sensitization	SPT-any	SPT-ANY	atopic	ANY	5to14	5	high	high	High	Other	Low	Low																	Low	OR	0.59	0.66			0.59
Elliott	2008	ALSPAC	prospective cohort	prospective	Duration of exclusive breastfeeding	eBF	0	?4	0	0to2	2		>=4	Allergic Sensitization	SPT-ANY	SPT-ANY	atopic	ANY	5to14	7	normal/low	normal	Unclear	Other	Low	Low					OR	1.14	0.9	1.44			OR	1.07	0.84	1.38			Low	OR	0.13	0.12	0.07	0.13	0.07
Huurre	2008	Huurre	prospective cohort	prospective	Duration of exclusive breastfeeding	eBF	<2	>=2	2	0to2	2		>=2	Allergic Sensitization	SPT-any	SPT-ANY	atopic	ANY	0to4	1	high	high	Unclear	Other	Low	Low											OR	3.43	1.19	9.89	0.018	Exclusive breastfeeding followed the same pattern (Fig. 1b), and a significant interaction between the allergy status of the mother and the duration of exclusive breastfeeding (interaction test P = 0.025) was detected.	Low	OR			1.23	0.54	1.23
Arshad	1992	Isle of Wight Prevention Study	prospective cohort	prospective	Duration of exclusive breastfeeding	eBF	<3	3	3	3to4	2		>=3	Allergic Sensitization	STP-any	SPT-ANY	atopic	ANY	0to4	1	normal/low	normal	High	Other	Low	Low																	Low	OR	0.21	0.65			0.21
Kull	2010	BAMSE	prospective cohort	prospective	Duration of exclusive breastfeeding	eBF	< 4	>= 4	4	3to4	2		>=4	Allergic Sensitization	IgE-any	sIgE-ANY	atopic	ANY	5to14	8	normal/low	normal	Low	Low	Low	Low											OR	0.79	0.64	0.99			Low	OR			-0.24	0.12	-0.24
Mihrshahi	2007	Childhood ASTHMA Prevention Study (CAPS)	prospective cohort	prospective	Duration of exclusive breastfeeding	eBF	<3	3	3	3to4	2		>=3	Allergic Sensitization	SPT-any	SPT-ANY	atopic	ANY	5to14	5	high	high	Low	Low	Low	Low					OR	1.55	1.04	2.31			OR	1.36	0.9	2.07			Low	OR	0.44	0.2	0.31	0.21	0.31
Siltanen	2003	Saarinen KM, 1999 (#1282)	prospective cohort (of RCT)	prospective	duration of exclusive breastfeeding	eBF	<3	>=3	3	3to4	2		>=3	Allergic Sensitization	SPT-any	SPT-ANY	atopic	ANY	0to4	4	normal/low	normal	High	Other	Low	Low																	Low	OR	-0.56	0.27			-0.56
Arshad	1992	Isle of Wight Prevention Study	prospective cohort	prospective	Duration of exclusive breastfeeding	eBF	<3	3	3	3to4	2		>=3	Allergic Sensitization	STP-cow's milk	SPT-CM	atopic	CM	0to4	1	normal/low	normal	High	Other	Low	Low																	Low	OR	0.6	0.55			0.6
Kull	2010	BAMSE	prospective cohort	prospective	Duration of exclusive breastfeeding	eBF	< 4	>= 4	4	3to4	2		>=4	Allergic Sensitization	IgE-cow milk	sIgE-CM	atopic	CM	5to14	8	normal/low	normal	Low	Low	Low	Low											OR	0.78	0.55	1.07			Low	OR			-0.25	0.16	-0.25
Schoetzau	2002	GINI (COHORT)	prospective cohort	prospective	duration of exclusive breastfeeding	eBF	<4	>=4	4	3to4	2		>=4	Allergic Sensitization	IgE-Cow's milk	sIgE-CM	atopic	CM	0to4	1	high	high	High	Other	Low	Low					OR				0.457		OR	1.3	0.74	2.28		Factors without influence on the exposure or outcome variables were excluded from the multiple logistic regression model in a backward stepping procedure.	Low	OR	0.2	0.27	0.26	0.29	0.26
Arshad	1992	Isle of Wight Prevention Study	prospective cohort	prospective	Duration of exclusive breastfeeding	eBF	<3	3	3	3to4	2		>=3	Allergic Sensitization	STP-egg	SPT-EGG	atopic	EGG	0to4	1	normal/low	normal	High	Other	Low	Low																	Low	OR	0.09	0.38			0.09
Kull	2010	BAMSE	prospective cohort	prospective	Duration of exclusive breastfeeding	eBF	< 4	>= 4	4	3to4	2		>=4	Allergic Sensitization	IgE-egg	sIgE-EGG	atopic	EGG	5to14	8	normal/low	normal	Low	Low	Low	Low											OR	1.3	0.81	2.09			Low	OR			0.26	0.24	0.26
Nwaru	2010	DIPP (Type 1 Diabetes Prediction and Prevention Project)	prospective cohort	prospective	Duration of exclusive breastfeeding	eBF	<0.92	> 3.0	1	0to2	2		>=3	Allergic Sensitization	IgE-foodallergen	sIgE-FOOD	atopic	FOOD	5to14	5	normal/low	normal	Low	Low	Low	Low					OR	1.33	0.87	2.02			OR	1.61	0.98	2.65			Low	OR	0.29	0.21	0.48	0.25	0.48
Van Asperen	1983	Van Asperen	prospective cohort	prospective	duration of exclusive breastfeeding	eBF	> 2	< 2	2	0to2	1		>=2	Allergic Sensitization	SPT-FOOD	SPT-FOOD	atopic	FOOD	0to4	1	high	high	High	Other	Low	Low										no significant difference/Ten (19%) of the fifty-four infants exclusively breast fed for 2 months developed positive skin tests to foods which were not significantly different to three (12%) ofthe twenty-five infants not breast fed.							Low	OR	-0.51	0.71			-0.51
Hong	2011	Boston Birth Cohort	prospective cohort	prospective	Duration of exclusive breastfeeding	eBF	0	>=4	0	0to2	2		>=4	Allergic Sensitization	IgE- any food allergen	sIgE-FOOD	atopic	FOOD	0to4	2.5	normal/low	normal	Unclear	Other	Low	Low					OR	1.6	1.1	2.4	0.22		OR	1.6	1.1	2.5	0.029	Because FS status defined at the age of 2 years or greater might be more stable and persistent, we then stratified the total sample into 2 groups according to the age when FS status was defined.We observed that the positive association between breast-feeding and FS was stronger in children aged 2 or more years (OR, 2.3; 95% CI, 1.3-4.1) than in those aged less than 2 years (OR, 1.1; 95% CI, 0.7-1…	Low	OR	0.47	0.21	0.47	0.23	0.47
Kull	2010	BAMSE	prospective cohort	prospective	Duration of exclusive breastfeeding	eBF	< 4	>= 4	4	3to4	2		>=4	Allergic Sensitization	IgE-foodallergen	sIgE-FOOD	atopic	FOOD	5to14	8	normal/low	normal	Low	Low	Low	Low											OR	0.93	0.72	1.21			Low	OR			-0.07	0.13	-0.07
Van Asperen	1983	Van Asperen	prospective cohort	prospective	duration of exclusive breastfeeding	eBF	> 4	< 4	4	3to4	1		>=4	Allergic Sensitization	SPT-FOOD	SPT-FOOD	atopic	FOOD	0to4	1	high	high	High	Other	Low	Low										no significant difference/There was also no difference for infants breast fed exclusively for 4 months compared to those receiving cow's milk and/or solids, the figures being three (16%) and ten (17%) respectively.							Low	OR	0.08	0.72			0.08
Kull	2010	BAMSE	prospective cohort	prospective	Duration of exclusive breastfeeding	eBF	< 4	>= 4	4	3to4	2		>=4	Allergic Sensitization	IgE-peanut	sIgE-PEANUT	atopic	PEANUT	5to14	8	normal/low	normal	Low	Low	Low	Low											OR	1.01	0.68	1.5			Low	OR			0.01	0.2	0.01
Poikonen	2008	Poikonen, S.	CASE CONTROL	retrospective	Duration of exclusive breastfeeding	eBF	<3	3	3	3to4	2		>=3	ALLERGIC SENSITISATION	SPT-turnip rape and oilseed rape	SPT-turnip rape and oilseed rape	atopic	turnip-oilseed rape	0to4	2.5	normal/low	normal	High	Other	Low	Low	50	14	39	25	OR	2.22	1.01	4.88	0.047		OR						Low	OR	0.8	0.4			0.8
Fergusson	1983	Chirstchurch Child Development Study	prospective cohort	prospective	SOLID FOOD	solid	<4	4	4	3to4	2	medium	4	Asthma-Wheeze	Ever Asthma(DD)		atopic	wheeze.rec	0to4	4	normal	low/normal	Other	Other	Low	Low																	Low	OR	-0.13	0.26			-0.13
Snijders	2008	KOALA	prospective cohort	prospective	SOLID FOOD	solid	3	>7	3	3to4	2	medium	4TO6	Asthma-Wheeze	recurrent wheezing		atopic	wheeze.rec	0to4	2	normal	low/normal	Low	Low	Low	Low					OR	1.74	0.74	4.07			OR	3.52	1.42	8.73			Low	OR	0.55	0.43	1.26	0.46	1.26
Wilson	1998	Dundee infant feeding study	prospective cohort	prospective	solid food	solid	>=4	<4	4	3to4	1	>=4	>=4	Asthma-Wheeze	Ever Asthma(DD)		atopic	wheeze.rec	5to14	7.3	normal	low/normal	Other	Other	Low	Low																	Low	OR	0.41	0.27			0.41
Mihrshahi	2007	Childhood ASTHMA Prevention Study (CAPS)	prospective cohort	prospective	SOLID FOOD	solid	>3	<3	3	3to4	1	>=3	>=3	Asthma-Wheeze	Ever Asthma(DD)		atopic	wheeze.rec	5to14	5	high	high	Low	Low	Low	Low					OR	0.7	0.4	1.22			OR	0.65	0.36	1.15			Low	OR	-0.36	0.28	-0.43	0.29	-0.43
Larsson	2008	Dampness in Buildings and Health (DBH)	prospective cohort	prospective	solid food	solid	>6	<3	3	3to4	1	long	>=6	Asthma-Wheeze	Doctor diagnosed asthma and/or wheezing ever in 2005 No Doctor diagnosed asthma and no wheezing ever at baseline		atopic	wheeze.rec	5to14	9	normal	low/normal	Low	Low	Low	Low					OR	1.36	0.59	3.14		5-YRS INCEDENCE	OR				ns		Low	OR	0.31	0.43			0.31
Zutavern	2008	LISA STUDY	prospective cohort	prospective	First introduction of any solids	solid	Solids introduced by 4 months	4-6 months	4	3to4	2	medium	4TO6	Asthma-Wheeze	DD Asthma		atopic	wheeze.rec	5to14	6	normal	low/normal	Low	Low	Low	Low											OR	1.1	0.36	3.32			Low	OR			0.1	0.56	0.1
Kurukulaaratchy	2004	The Isle of Wight Prevention Study	prospective cohort	prospective	SOLID FOOD	solid	<3	3	3	3to4	2	>=3	>=3	Asthma-Wheeze	early-onset persistent wheezers		atopic	wheeze.rec	5to14	10	normal	low/normal	Other	Other	Low	Low					OR	1.77	1.09	2.88	0.02						NS	non statistically significant	Low	OR	0.57	0.25			0.57
Karunasekera	2001	Karunasekera, K. A.	CASE CONTROL	retrospective	SOLID FOOD	solid	?4	?3	3	3to4	1	>=3	>=3	Asthma-Wheeze	Doctor diagnosed Asthma		atopic	wheeze.rec	5to14	10	normal	low/normal	Other	Other	Low	Low	49	251	54	246	OR	0.9	0.6	1.4			OR				ns		Low	OR	-0.11	0.23			-0.11
Hide	1981	The Isle of Wight Prevention study	prospective cohort	prospective	SOLID FOOD OR CEREAL	solid	>=3	<3	3	3to4	1	>=3	>=3	Asthma-Wheeze	Ever Asthma		atopic	wheeze	0to4	1	normal	low/normal	Other	Other	Low	Low																	Low	OR	-0.64	0.32			-0.64
Van Asperen	1983	Van Asperen	prospective cohort	prospective	SOLID FOOD	solid	> 4	< 4	4	3to4	1	>=4	>=4	WHEEZE			atopic	wheeze	0to4	1.3	high	high	Other	Other	Low	Low										no significant difference							Low	OR	0.31	0.52			0.31
Wilson	1998	Dundee infant feeding study	prospective cohort	prospective	solid food	solid	>=4	<4	4	3to4	1	>=4	>=4	Asthma-Wheeze	Ever Wheeze		atopic	wheeze	5to14	7.3	normal	low/normal	Other	Other	Low	Low																	Low	OR	0.91	0.31			0.91
Zutavern	2008	LISA STUDY	prospective cohort	prospective	First introduction of any solids	solid	Solids introduced by 4 months	4-6 months	4	3to4	2	medium	4TO6	Asthma-Wheeze	Parent report of wheezing		atopic	wheeze	5to14	6	normal	low/normal	Other	Other	Low	Low											OR	0.76	0.46	1.27			Low	OR			-0.27	0.26	-0.27
Ziegler	2003	German BABYDIAB	prospective cohort	prospective	Total BF duration	solid	<3	>=3	3	3to4	2		>=3	DM	IAA, GADA or IA2 >99th percentile	TIDM-Ab	autoim	TIDM	auto	5	high	high	Low	Low	Low	Low					Hazard ratio	3.33333	0.434783	25			Hazard ratio	3.33333	0.4	20	0.3		Low	HR	1.2	1.03	1.2	0.91	1.2
Kostraba	1993	COLORADO DIABETES REGISTRY	case control	retrospective	SOLID FOOD	solid	3+	0-3	3	3to4	1	>=3	>=3	DM	Medical diagnosis	TIDM	autoim	TIDM	auto	<18	normal	low/normal	Low	Low	Low	Low					OR	2.6	1.3	5.3			OR	2.5	1.4	4.3			Low	OR	0.96	0.36	0.92	0.28	0.92
Stene	2003	Norwegian Childhood Diabetes Study Group	CASE CONTROL	retrospective		solid	?3	?5	3	3to4	2	medium	>=5	TIDM	Medical diagnosis	TIDM	autoim	TIDM	auto	8.8	normal	low/normal	Other	Other	Low	Low	135	119	466	318	OR	0.77	0.58	1.03	0.08	p for trend	OR	1.45	0.95	2.21	0.12	p for trend	Low	OR	-0.26	0.15	0.37	0.22	0.37
Visalli	2003	EURODIAB Italy	CASE CONTROL	retrospective	WEANING'	solid	?3	<3	3	3to4	1	>=3	>=3	DM	T1DM diagnosis using WHO criteria	TIDM	autoim	TIDM	auto	12	normal	low/normal	Other	Other	Low	Low					OR	1.81	1.06	3.07									Low	OR	0.59	0.27			0.59
Frederikson	2012	DAISY (Diabetes Autoimmunity Study in the Young)	prospectvie cohort	prospective	Timing of specific food introduction - ANY SOLID FOOD	solid	2017-05-04	0-4	4	3to4	1	medium	4TO5	DM	Medical diagnosis	TIDM	autoim	TIDM	auto	<7	high	high	Other	Other	Low	Low					HR						HR	2.03	1.09	3.77			Low	HR			0.71	0.32	0.71
Dahlquist	2002	EURODIAB Substudy 2 Study Grp Austria, Latvia, Lithuania, Luxembourg and UK	CASE CONTROL	retrospective	AGE AT INTRODUCTION solid foods	solid	?3	<3	3	3to4	1	>=3	>=3	TIDM	T1DM diagnosed <15yrs	TIDM	autoim	TIDM	auto	<15	normal	low/normal	Other	Other	Low	Low					OR	0.74	0.57	0.95								Adjustment for several confounding variables [maternal age at delivery, neonatal jaundice, neonatal resp infectio, asthma, vitD supplementation] did not alter these results significantly	Low	OR	-0.3	0.13			-0.3
Venter	2009	VENTER, C	prospective cohort	prospective	solid food	solid	>4	<4	4	3to4	1	>=4	>=4	Food Allergy	any		atopic	FA-ANY	0to4	1	normal	low/normal	Other	Other	Low	Low					OR	0.41	0.18	0.89									Low	OR	-0.89	0.4			-0.89
Hummel	2006	German BABYDIAB	prospective cohort	prospective	SOLID FOOD	solid	>3	<3	3	3to4	1	>=3	>=3	CD	Antibodies to TGC	CD-Ab	autoim	CD-Ab	auto	8	high	high	Other	Other	Low	Low					HR	1.8	0.5	6	0.3							Hazard ratios are from univariate analysis unless otherwise stated.	Low	HR	0.59	0.61			0.59
Hide	1981	The Isle of Wight Prevention study	prospective cohort	prospective	SOLID FOOD OR CEREAL	solid	>=3	<3	3	3to4	1	>=3	>=3	Rhinoconjunctivits	Ever AR		atopic	AR	0to4	1	normal	low/normal	Other	Other	Low	Low																	Low	OR	-0.25	0.19			-0.25
Van Asperen	1983	Van Asperen	prospective cohort	prospective	SOLID FOOD	solid	> 4	< 4	4	3to4	1	>=4	>=4	RHINOCONJUNCTIVITIS			atopic	AR	0to4	1.3	high	high	Other	Other	Low	Low										no significant difference							Low	OR	0.29	0.46			0.29
Larsson	2008	Dampness in Buildings and Health (DBH)	prospective cohort	prospective	solid food	solid	>6	<3	3	3to4	1	long	>=6	Rhinoconjunctivits	any rhinitis symptoms in 2005 and no rhinitis smptoms at baseline		atopic	AR	5to14	9	normal	low/normal	Low	Low	Low	Low					OR	0.74	0.32	1.68		5-YRS INCEDENCE	OR				ns		Low	OR	-0.3	0.42			-0.3
Zutavern	2008	LISA STUDY	prospective cohort	prospective	First introduction of any solids	solid	Solids introduced by 4 months	4-6 months	4	3to4	2	medium	4TO6	Rhinoconjunctivits	DD AR		atopic	AR	5to14	6	normal	low/normal	Low	Low	Low	Low											OR	1.12	0.42	2.99			Low	OR			0.11	0.5	0.11
Chuang	2011	TaiwanBirth Cohort Study	prospective cohort	prospective	solid food	solid	<4	2017-06-04	4	3to4	2	medium	4TO6	AD			atopic	AD	0to4	1.5	normal	low/normal	Low	Low	Low	Low					OR	1.18	0.85	1.62			OR	1.11	0.8	1.53		Considering the effect of maternal education on breastfeeding practice and AD reported, we analyzed odds ratio of AD beyond 6 months by maternal educational level in Table 4. After adjustment for potential confounders, prolonging breastfeeding did not show the protective effect on AD among 18 months children, even significantly increased the risk of AD in children whose mothers had high education…	Low	OR	0.17	0.16	0.1	0.16	0.1
Haileamlak	2005	Haileamlak, A.	case control	retrospective	age of initiation of weaning (not defined)	solid	<4	2017-06-04	4	3to4	2	long	>=6	AD	AD		atopic	AD	0to4	5	normal	low/normal	Other	Other	Low	Low											OR	0.76	0.51	1.13			Low	OR			-0.27	0.2	-0.27
Mihrshahi	2007	Childhood ASTHMA Prevention Study (CAPS)	prospective cohort	prospective	SOLID FOOD	solid	>3	<3	3	3to4	1	>=3	>=3	AD	Ever AD		atopic	AD	5to14	5	high	high	Low	Low	Low	Low					OR	0.56	0.32	0.97			OR	0.59	0.33	1.04			Low	OR	-0.58	0.28	-0.53	0.29	-0.53
Larsson	2008	Dampness in Buildings and Health (DBH)	prospective cohort	prospective	solid food	solid	>6	<3	3	3to4	1	long	>=6	AD	eczema ever and no eczema ever at baseline		atopic	AD	5to14	9	normal	low/normal	Low	Low	Low	Low					OR	2.43	1.24	4.74		5-YRS INCEDENCE	OR	2.76	1.35	5.67			Low	OR	0.89	0.34	1.02	0.37	1.02
Hide	1981	The Isle of Wight Prevention study	prospective cohort	prospective	SOLID FOOD OR CEREAL	solid	>=3	<3	3	3to4	1	>=3	>=3	AD	Ever AD		atopic	AD	0to4	1	normal	low/normal	Other	Other	Low	Low																	Low	OR	0.33	0.27			0.33
Huang	2013	Huang	prospective cohort	prospective	Introduction of supplementary food before 4 months	solid	before 4 months	after 4 months	4	3to4	1	>=4	>=4	AD	eczema		atopic	AD	0to4	2	normal	low/normal	Other	Other	Low	Low					OR	1.576	1.035	2.402	0.0341		Not available						Low	OR	0.45	0.22			0.45
Zutavern	2008	LISA STUDY	prospective cohort	prospective	First introduction of any solids	solid	Solids introduced by 4 months	4-6 months	4	3to4	2	medium	4TO6	AD	Parent report of eczema		atopic	AD	5to14	6	normal	low/normal	Other	Other	Low	Low											OR	0.6	0.24	1.51			Low	OR			-0.51	0.47	-0.51
Sahakyan	2006	Sahakyan, A.	CASE CONTROL	retrospective	SOLID FOOD	solid	?4	<4	4	3to4	1	>=4	>=4	AD			atopic	AD	0to4	7	normal	low/normal	Low	Low	Low	Low					OR						OR	3.1	1.4	6.9	0.006		Low	OR			1.13	0.41	1.13
Van Asperen	1983	Van Asperen	prospective cohort	prospective	SOLID FOOD	solid	> 4	< 4	4	3to4	1	>=4	>=4	AD			atopic	AD	0to4	1.3	high	high	Other	Other	Low	Low										no significant difference							Low	OR	-0.03	0.46			-0.03
Filipiak	2007	GINI	prospective cohort	prospective	AGE AT INTRODUCTION/the introduction of solid foods in the first 12 mo	solid	0-4 mo	> 6 mo	4	3to4	2	long	>=6	AD	DD eczema		atopic	AD	0to4	4	normal	low/normal	Low	Low	Low	Low											OR	1	0.72	1.4			Low	OR			0	0.17	0
Zutavern	2006	LISA STUDY	prospective cohort	prospective	SOLID FOOD	solid	0-4	>6m	4	3to4	2	long	>=6	AD	Doctor Diagnosed AD		atopic	AD	0to4	2	normal	low/normal	Low	Low	Low	Low											OR	1.31	0.93	1.86		We repeated the analyses for a stricter AD definition that comprised the combination of doctor-diagnosis and symptoms of AD. There was no evidence for a protective effect of a delayed introduction of solids in months 5 to 6 or beyond 6 months on this outcome (data not shown). Analyses for the associations between any solids and solid diversity at ages 4 and 6 months in relation to AD and sensitiz…	Low	OR			0.27	0.18	0.27
Snijders	2008	KOALA	prospective cohort	prospective	SOLID FOOD	solid	3	>7	3	3to4	2	medium	4TO6	AD	paretn questionnaire		atopic	AD	0to4	2	normal	low/normal	Low	Low	Low	Low					OR	1.98	1.13	3.47			OR	2.1	1.17	3.76			Low	OR	0.68	0.29	0.74	0.3	0.74
Ruiz	1992	Ruiz	prospective cohort	prospective	SOLID FOOD	solid	>3	<=3	3	3to4	1	>=3	>=3	AD			atopic	AD	0to4	1	high	high	Other	Other	Low	Low									NS								Low	OR	-0.49	0.73			-0.49
Dunlop	2006	Slovak birth cohort	prospective cohort	prospective	SOLID FOOD	solid	>4	<4	4	3to4	1	>=4	>=4	AD			atopic	AD	0to4	1	normal	low/normal	Other	Other	Low	Low					OR	0.81	0.6	1.1									Low	OR	-0.21	0.16			-0.21
Fergusson	1982	Chirstchurch Child Development Study	prospective cohort	prospective	SOLID FOOD	solid	<4	4	4	3to4	2	medium	4	AD	Ever AD		atopic	AD	0to4	1	normal	low/normal	Other	Other	Low	Low																They only report OR and p-value. table 4 In addition based on the grouping we used we cannot use the adj analyses as in tabl34	Low	OR	-0.32	0.27			-0.32
Zutavern	2008	LISA STUDY	prospective cohort	prospective	First introduction of any solids	solid	Solids introduced by 4 months	4-6 months	4	3to4	2	medium	4TO6	Allergic Sensitization	inhalant sensitisation	sIgE-AEROALLERGEN	atopic	AEROALLERGEN	5to14	6	normal	low/normal	Low		Low	Low											OR	0.92	0.57	1.49			Low	OR			-0.08	0.25	-0.08
Snijders	2008	KOALA	prospective cohort	prospective	SOLID FOOD	solid	3	>7	3	3to4	2	long	>=7	Allergic Sensitization	IgE-AEROALLERGEN	sIgE-AEROALLERGEN	atopic	AEROALLERGEN	0to4	2	normal	low/normal	Low		Low	Low					OR	17.29	1.94	154.17			OR	20.86	2.17	200.75			Low	OR	2.85	1.12	3.04	1.16	3.04
Mihrshahi	2007	Childhood ASTHMA Prevention Study (CAPS)	prospective cohort	prospective	SOLID FOOD	solid	>3	<3	3	3to4	1	>=3	>=3	Allergic Sensitization	SPT-any	SPT-ANY	atopic	ANY	5to14	5	high	high	Low		Low	Low					OR	0.49	0.31	0.79			OR	0.54	0.33	0.87			Low	OR	-0.71	0.24	-0.62	0.24	-0.62
Zutavern	2006	LISA STUDY	prospective cohort	prospective	SOLID FOOD	solid	0-4	>6m	4	3to4	2	long	>=6	Allergic Sensitization	IgE-ANY	sIgE-ANY	atopic	ANY	0to4	2	normal	low/normal	Low		Low	Low											OR	0.86	0.54	1.37		We repeated the analyses for a stricter AD definition that comprised the combination of doctor-diagnosis and symptoms of AD. There was no evidence for a protective effect of a delayed introduction of solids in months 5 to 6 or beyond 6 months on this outcome (data not shown). Analyses for the associations between any solids and solid diversity at ages 4 and 6 months in relation to AD and sensitiz…	Low	OR			-0.15	0.24	-0.15
Snijders	2008	KOALA	prospective cohort	prospective	SOLID FOOD	solid	3	>7	3	3to4	2	long	>=7	Allergic Sensitization	IgE-ANY	sIgE-ANY	atopic	ANY	0to4	2	normal	low/normal	Low		Low	Low					OR	3.94	1.09	14.19			OR	4.31	1.14	16.22			Low	OR	1.37	0.65	1.46	0.68	1.46
Joseph	2011	WHEALS STUDY	prospective cohort	prospective	complementary food' introduced <4 months age.	solid	Complementary foods introduced at 4 months or later	Early' complementary food introduction ie <4 months	4	3to4	1	>=4	>=4	Allergic Sensitization	sIgE to milk	sIgE-CM	atopic	CM	0to4	3	normal	low/normal	Other		Low	Low					OR	1.1	0.7	1.5	0.786								Low	OR	0.1	0.16			0.1
Snijders	2008	KOALA	prospective cohort	prospective	SOLID FOOD	solid	3	>7	3	3to4	2	long	>=7	Allergic Sensitization	IgE-Milk	sIgE-CM	atopic	CM	0to4	2	normal	low/normal	Low		Low	Low					OR	1.73	0.35	8.43			OR	1.82	0.35	9.37			Low	OR	0.55	0.81	0.6	0.84	0.6
Joseph	2011	WHEALS STUDY	prospective cohort	prospective	complementary food' introduced <4 months age.	solid	Complementary foods introduced at 4 months or later	Early' complementary food introduction ie <4 months	4	3to4	1	>=4	>=4	Allergic Sensitization	sIgE to egg	sIgE-EGG	atopic	EGG	0to4	3	normal	low/normal	Other		Low	Low					OR	1	0.7	1.5	0.846								Low	OR	0	0.21			0
Snijders	2008	KOALA	prospective cohort	prospective	SOLID FOOD	solid	3	>7	3	3to4	2	long	>=7	Allergic Sensitization	IgE-EGG	sIgE-EGG	atopic	EGG	0to4	2	normal	low/normal	Low		Low	Low					OR	4.67	0.4	54.31			OR	5.88	0.45	76.85			Low	OR	1.54	1.25	1.77	1.31	1.77
Venter	2009	VENTER, C	prospective cohort	prospective	solid food	solid	>4	<4	4	3to4	1	>=4	>=4	Allergic Sensitization	SPT-any	SPT-FOOD	atopic	FOOD	0to4	1	normal	low/normal	Other		Low	Low					OR	0.26	0.05	0.94									Low	OR	-1.35	0.66			-1.35
Zutavern	2006	LISA STUDY	prospective cohort	prospective	SOLID FOOD	solid	0-4	>6m	4	3to4	2	long	>=6	Allergic Sensitization	IgE-food	sIgE-FOOD	atopic	FOOD	0to4	2	normal	low/normal	Low		Low	Low											OR	0.83	0.49	1.41		We repeated the analyses for a stricter AD definition that comprised the combination of doctor-diagnosis and symptoms of AD. There was no evidence for a protective effect of a delayed introduction of solids in months 5 to 6 or beyond 6 months on this outcome (data not shown). Analyses for the associations between any solids and solid diversity at ages 4 and 6 months in relation to AD and sensitiz…	Low	OR			-0.19	0.27	-0.19
Joseph	2011	WHEALS STUDY	prospective cohort	prospective	complementary food' introduced <4 months age.	solid	Complementary foods introduced at 4 months or later	Early' complementary food introduction ie <4 months	4	3to4	1	>=4	>=4	Allergic Sensitization	sIgE to peanut	sIgE-PEANUT	atopic	PEANUT	0to4	3	normal	low/normal	Other		Low	Low					OR	0.6	0.4	1.1	0.121								Low	OR	-0.51	0.31			-0.51
Snijders	2008	KOALA	prospective cohort	prospective	SOLID FOOD	solid	3	>7	3	3to4	2	long	>=7	Allergic Sensitization	IgE-PEANUT	sIgE-PEANUT	atopic	PEANUT	0to4	2	normal	low/normal	Low		Low	Low					OR	4.67	0.4	54.31			OR	7.85	0.58	106.55			Low	OR	1.54	1.25	2.06	1.33	2.06
Nagel (Affluent countries)	2008	ISAAC Phase 2 - Affluent countries	CROSS SECTIONAL	retrospective	Ever breastfed	TBF	never	ever	0	0	2	>0	>0	Asthma-Wheeze	Nonatopic Wheeze		atopic	wheeze-non atopic	5to14	12	normal	low/normal	High	Other	Low	Low					OR	0.88	0.73	1.05			OR	0.87	0.72	1.06			Low	OR	-0.13	0.09	-0.14	0.1	-0.14
Nagel (Non Affluent countries)	2008	ISAAC Phase 2- Nonaffluent countries	CROSS SECTIONAL	retrospective	Ever breastfed	TBF	never	ever	0	0	2	>0	>0	Asthma-Wheeze	Nonatopic Wheeze		atopic	wheeze-non atopic	5to14	12	normal	low/normal	High	Other	Low	Low					OR	0.71	0.55	0.92			OR	0.69	0.53	0.9			Low	OR	-0.34	0.13	-0.37	0.14	-0.37
Burr	1993	Burr	prospective cohort	prospective	Ever breastfed	TBF	never	ever	0	0	2	>0	>0	Asthma-Wheeze	wheeze		atopic	wheeze-non atopic	5to14	7	high	high	Low	Low	Low	Low					OR						OR	0.52	0.27	0.98			Low	OR			-0.65	0.32	-0.65
Granell	2012	ALSPAC	prospective cohort	prospective	Total duration of breastfeeding	TBF	0	>6	0	0	2	long	>=6	Asthma-Wheeze	late onset wheeze		atopic	wheeze-Late onset	5to14	7	normal	low/normal	Low	Low	Low	Low					OR	1	0.76	1.31			OR	1.07	0.8	1.45			Low	OR	0	0.14	0.07	0.16	0.07
Granell	2012	ALSPAC	prospective cohort	prospective	Total duration of breastfeeding	TBF	<= 3	>3	3	3to4	2	>=3	>=3	Asthma-Wheeze	late onset wheeze		atopic	wheeze-Late onset	5to14	7	normal	low/normal	Low	Low	Low	Low					OR	0.95	0.69	1.33			OR	1.02	0.82	1.26			Low	OR	-0.05	0.17	0.02	0.11	0.02
Caudri	2013	PIAMA	prospective cohort	prospective	Total duration of breastfeeding	TBF	<=3	>3	3	3to4	2	>=3	>=3	Asthma-Wheeze	Late onset wheeze		atopic	wheeze-Late onset	5to14	8	normal	low/normal	Low	Low	Low	Low											OR	0.87	0.46	1.62			Low	OR			-0.14	0.32	-0.14
Midodzi	2008	National Longitudinal Survey of Children and Youth	prospective cohort	prospective	Ever breastfed	TBF	never	ever	0	0	2	>0	>0	Asthma-Wheeze	primary school wheeze		atopic	wheeze-Late onset	5to14	9	normal	low/normal	Unclear	Other	Low	Low					OR	1.04	0.67	1.6							ns		Low	OR	0.04	0.22			0.04
Rusconi	1999	SIDRIA	CROSS-SECTIONAL	retrospective	Total duration of breastfeeding	TBF	0	>=6	0	0	2	long	>=6	Asthma-Wheeze	Wheezing of late onset		atopic	wheeze-Late onset	5to14	7	normal	low/normal	Unclear	Other	Low	Low					OR	1.21	1	1.46			OR	1.22	0.99	1.5			Low	OR	0.19	0.1	0.2	0.11	0.2
Alper	2006	BURSA TURKEY	CROSS SECTIONAL	retrospective	TOTAL BF DURATION	TBF	< 3	>3	3	3to4	2	>=3	>=3	WHEEZE	Late-onset wheeze		atopic	wheeze-Late onset	5to14	7	normal	low/normal	Unclear	Other	Low	Low	2.97	63.03	57.96	632.04							OR	0.85	0.42	1.71			Low	OR	-0.67	0.61	-0.16	0.36	-0.16
Sherriff	2001	ALSPAC	prospective cohort	prospective	Ever breastfed	TBF	never	ever	0	0	2	>0	>0	Asthma-Wheeze	late onset wheezing		atopic	wheeze-Late onset	0to4	3.5	normal	low/normal	Low	Low	Low	Low					OR	1.3	1	1.7			OR	1	0.8	1.2		0.9	Low	OR	0.26	0.14	0	0.09	0
Muiño	2008	Muino, Perlotas Brazil	prospective cohort	prospective	Total duration of breastfeeding	TBF	<1	4-8.9	1	1to2	2	medium	4TO9	Asthma-Wheeze	late-onset wheezing		atopic	wheeze-Late onset	5to14	12	normal	low/normal	High	Other	Low	Low					fisher's exact tests					0.05 p vlue for all categories							Low	OR	0.73	0.54			0.73
Granell	2012	ALSPAC	prospective cohort	prospective	Total duration of breastfeeding	TBF	0	>6	0	0	2	long	>=6	Asthma-Wheeze	transient early wheeze		atopic	wheeze-Early transient	5to14	7	normal	low/normal	Low	Low	Low	Low					OR	0.78	0.64	0.96			OR	0.81	0.64	1.01			Low	OR	-0.25	0.11	-0.21	0.11	-0.21
Granell	2012	ALSPAC	prospective cohort	prospective	Total duration of breastfeeding	TBF	<= 3	>3	3	3to4	2	>=3	>=3	Asthma-Wheeze	transient early wheeze		atopic	wheeze-Early transient	5to14	7	normal	low/normal	Low	Low	Low	Low					OR	0.85	0.74	0.99			OR	0.87	0.74	1.02			Low	OR	-0.16	0.08	-0.14	0.08	-0.14
Caudri	2013	PIAMA	prospective cohort	prospective	Total duration of breastfeeding	TBF	<=3	>3	3	3to4	2	>=3	>=3	Asthma-Wheeze	Early transient wheeze		atopic	wheeze-Early transient	5to14	8	normal	low/normal	Low	Low	Low	Low											OR	0.82	0.66	1.02			Low	OR			-0.2	0.11	-0.2
Simon	2008	Childhood Atopy Study (CAS)	prospective cohort	prospective	Ever breastfed	TBF	never	ever	0	0	2	>0	>0	Asthma-Wheeze	transient wheeze		atopic	wheeze-Early transient	5to14	6	normal	low/normal	Unclear	Other	Low	Low																	Low	OR	-0.33	0.24			-0.33
Midodzi	2008	National Longitudinal Survey of Children and Youth	prospective cohort	prospective	Ever breastfed	TBF	never	ever	0	0	2	>0	>0	Asthma-Wheeze	preschool wheezers		atopic	wheeze-Early transient	5to14	9	normal	low/normal	Unclear	Other	Low	Low					OR	1.65	1.24	2.19			OR	1.54	1.13	2.09			Low	OR	0.5	0.14	0.43	0.16	0.43
Rusconi	1999	SIDRIA	CROSS-SECTIONAL	retrospective	Total duration of breastfeeding	TBF	0	>=6	0	0	2	long	>=6	Asthma-Wheeze	Transient Early Wheezing		atopic	wheeze-Early transient	5to14	7	normal	low/normal	Unclear	Other	Low	Low					OR	0.78	0.66	0.92			OR	0.82	0.68	0.97			Low	OR	-0.25	0.08	-0.2	0.09	-0.2
Alper	2006	BURSA TURKEY	CROSS SECTIONAL	retrospective	TOTAL BF DURATION	TBF	< 3	>3	3	3to4	2	>=3	>=3	WHEEZE	Early transient wheeze		atopic	wheeze-Early transient	5to14	7	normal	low/normal	Unclear	Other	Low	Low	13.91	93.09	57.96	632.04							OR	1.48	0.88	2.49			Low	OR	0.49	0.32	0.39	0.27	0.39
Muiño	2008	Muino, Perlotas Brazil	prospective cohort	prospective	Total duration of breastfeeding	TBF	<1	4-8.9	1	1to2	2	medium	4TO9	Asthma-Wheeze	transient wheezing		atopic	wheeze-Early transient	5to14	12	normal	low/normal	High	Other	Low	Low					fisher's exact tests					0.002 p vlue for all categories							Low	OR	-0.32	0.16			-0.32
Nagel (Affluent countries)	2008	ISAAC Phase 2 - Affluent countries	CROSS SECTIONAL	retrospective	Ever breastfed	TBF	never	ever	0	0	2	>0	>0	Asthma-Wheeze	Atopic Wheeze		atopic	wheeze-atopic	5to14	12	normal	low/normal	High	Other	Low	Low					OR	0.87	0.68	1.11			OR	0.85	0.67	1.08			Low	OR	-0.14	0.12	-0.16	0.12	-0.16
Nagel (Non Affluent countries)	2008	ISAAC Phase 2- Nonaffluent countries	CROSS SECTIONAL	retrospective	Ever breastfed	TBF	never	ever	0	0	2	>0	>0	Asthma-Wheeze	Atopic Wheeze		atopic	wheeze-atopic	5to14	12	normal	low/normal	High	Other	Low	Low					OR	0.84	0.57	1.25			OR	0.85	0.54	1.34			Low	OR	-0.17	0.2	-0.16	0.23	-0.16
Wright	1995	Tuscon Children's Respiratory Study	prospective cohort	prospective	Ever breastfed	TBF	ever	never	0	0	1	>0	>0	Asthma-Wheeze	recurrent wheeze		atopic	wheeze.rec-non atopic	5to14	6	high	high	Low	Low	Low	Low										<0.05	OR	3.02	1.05	8.69			Low	OR			1.11	0.54	1.11
Nwaru	2013	DIPP (Type 1 Diabetes Prediction and Prevention Project)	prospective cohort	prospective	Total duration of breastfeeding	TBF	>9.5	<5	5	5to7	1	long	>=10	Asthma-Wheeze	NON ATOPIC Asthma		atopic	wheeze.rec-non atopic	5to14	5	normal	low/normal	Low	Low	Low	Low					HR				<.001	Total breast-feeding for 9.5 months or less was positively associated with the risk of asthma, specifically nonatopic asthma OR>1 FIG 2	HR	2.95	1.31	6.66		We also performed the analysis by treating the food variables in their continuous form, and the results were similar to those obtained based on categorization into thirds (data not shown).	Low	HR			1.08	0.42	1.08
Roenmark	1999	Obstructive Lung Disease in Northern Sweden Study	nested case-control	prospective	Total duration of breastfeeding	TBF	?3	<3	3	3to4	1	>=3	>=3	Asthma-Wheeze	Nonatopic Asthma		atopic	wheeze.rec-non atopic	5to14	8	normal	low/normal	Unclear	Other	Low	Low					OR						OR	1.8	1.11	2.92			Low	OR			0.59	0.25	0.59
Scholtens	2009	PIAMA	prospective cohort	prospective	Total duration of breastfeeding	TBF	0	>3.5	0	0	2	medium	>=4	Asthma-Wheeze	Non atopic asthma		atopic	wheeze.rec-non atopic	5to14	8	normal	low/normal	Low	Low	Low	Low											OR	0.84	0.42	1.68			Low	OR			-0.17	0.35	-0.17
Wright	1995	Tuscon Children's Respiratory Study	prospective cohort	prospective	Ever breastfed	TBF	ever	never	0	0	1	>0	>0	Asthma-Wheeze	recurrent wheeze		atopic	wheeze.rec-atopic	5to14	6	low	low/normal	Low	Low	Low	Low										NS	OR	0.136	0.49	3.73			Low	OR			-2	1.69	-2
Roenmark	1999	Obstructive Lung Disease in Northern Sweden Study	nested case-control	prospective	Total duration of breastfeeding	TBF	?3	<3	3	3to4	1	>=3	>=3	Asthma-Wheeze	Atopic Asthma		atopic	wheeze.rec-atopic	5to14	8	normal	low/normal	Unclear	Other	Low	Low					OR						OR	1	0.55	1.82			Low	OR			0	0.31	0
Rona	2005	Rona, Chile	retrspective cohort	retrospective	Total duration of breastfeeding	TBF	> 1	<=1	1	1to2	1	>=1	>=1	WHEEZE	Atopic Asthma.12mo		atopic	wheeze.rec-atopic	ge15	27	normal	low/normal	Unclear	Other	Low	Low											OR	0.71	0.47	1.07	0.105		Low	OR			-0.34	0.21	-0.34
Scholtens	2009	PIAMA	prospective cohort	prospective	Total duration of breastfeeding	TBF	0	>3.5	0	0	2	medium	>=4	Asthma-Wheeze	Atopic Asthma		atopic	wheeze.rec-atopic	5to14	8	normal	low/normal	Low	Low	Low	Low											OR	0.75	0.42	1.34			Low	OR			-0.29	0.3	-0.29
Mavale-Manuel	2003	Mavale-Manuel, S.	CASE CONTROL	retrospective	Total duration of breastfeeding	TBF	>18	<=18	18	18	1	>=18	>=18	Asthma-Wheeze	Doctor-diagnosed Asthma		atopic	wheeze.rec	5to14	8	normal	low/normal	High	Other	Low	Low	61	39	39	60	OR	2.4	1.3	4.4	<0.001		OR						Low	OR	0.88	0.31			0.88
Larsson	2008	Dampness in Buildings and Health (DBH)	prospective cohort	prospective	Total duration of breastfeeding	TBF	>6	0	0	0	1	long	6	Asthma-Wheeze	doctor diagnosed asthma in 2005 No Doctor diagnosed asthma at baseline		atopic	wheeze.rec	5to14	9	normal	low/normal	Low	Low	Low	Low					OR	2.32	1.22	4.43		5-YRS INCEDENCE	OR	2.64	1.28	5.46			Low	OR	0.84	0.33	0.97	0.37	0.97
Wright	1995	Tuscon Children's Respiratory Study	prospective cohort	prospective	Ever breastfed	TBF	ever	never	0	0	1	>0	>0	Asthma-Wheeze	recurrent wheeze		atopic	wheeze.rec	5to14	6	normal	low/normal	Low	Low	Low	Low										<0.05	OR	1.49	0.8	2.77			Low	OR	0.57	0.29	0.4	0.32	0.4
Larsson	2008	Dampness in Buildings and Health (DBH)	prospective cohort	prospective	Total duration of breastfeeding	TBF	>6	<3	3	3to4	1	long	>=6	Asthma-Wheeze	doctor diagnosed asthma in 2005 No Doctor diagnosed asthma at baseline		atopic	wheeze.rec	5to14	9	normal	low/normal	Low	Low	Low	Low					OR	1.62	1.07	2.46		5-YRS INCEDENCE	OR	1.54	0.98	2.43			Low	OR	0.48	0.21	0.43	0.23	0.43
Nwaru	2013	DIPP (Type 1 Diabetes Prediction and Prevention Project)	prospective cohort	prospective	Total duration of breastfeeding	TBF	>9.5	<5	5	5to7	1	long	>=10	Asthma-Wheeze	Asthma(ICS/excercise).12mo		atopic	wheeze.rec	5to14	5	normal	low/normal	Low	Low	Low	Low					HR				<.001	Total breast-feeding for 9.5 months or less was positively associated with the risk of asthma, specifically nonatopic asthma OR>1 FIG 2	HR	1.91	1.21	3.02		We also performed the analysis by treating the food variables in their continuous form, and the results were similar to those obtained based on categorization into thirds (data not shown).	Low	HR			0.65	0.23	0.65
Fredriksson	2007	Friedriksson, Espoo city	prospective cohort	prospective	Total duration of breastfeeding	TBF	2017-06-04	0-3	3	3to4	1	medium	4TO6	Asthma-Wheeze	Asthma(DD).12mo		atopic	wheeze.rec	5to14	15	normal	low/normal	Unclear	Other	Low	Low											OR	1.44	0.78	2.66			Low	OR	0.43	0.3	0.36	0.31	0.36
Ehrlich	1996	Ehrlich, R. I.	CROSS-SECTIONAL	retrospective	Ever breastfed	TBF	ever	never	0	0	1	>0	>0	Asthma-Wheeze	Asthma		atopic	wheeze.rec	5to14	9	normal	low/normal	Unclear	Other	Low	Low	43.848	304.152	42.704	229.296	OR	0.78	0.49	1.22			OR	0.78	0.49	1.22			Low	OR	-0.25	0.23	-0.25	0.23	-0.25
Roenmark	1999	Obstructive Lung Disease in Northern Sweden Study	nested case-control	prospective	Total duration of breastfeeding	TBF	?3	<3	3	3to4	1	>=3	>=3	Asthma-Wheeze	Ever Asthma		atopic	wheeze.rec	5to14	8	normal	low/normal	Unclear	Other	Low	Low	66.64	127.36	25.792	78.208	OR				<0.001		OR	1.73	1.28	2.35			Low	OR	0.46	0.27	0.55	0.16	0.55
Karunasekera	2001	Karunasekera, K. A.	CASE CONTROL	retrospective	Total duration of breastfeeding	TBF	>6	?6	6	5to7	1	>=6	>=6	Asthma-Wheeze	Doctor diagnosed Asthma		atopic	wheeze.rec	5to14	10	normal	low/normal	Unclear	Other	Low	Low	74	210	41	257	OR	2.5	1.5	4.2			OR	2	1.2	3.2			Low	OR	0.92	0.26	0.69	0.24	0.69
Rosas Vargas	2002	Rosas Vargas	case control	retrospective	Being breastfed less than 3 months	TBF	being breastfed for more than 3 months	being breastfed for less than 3 months	3	3to4	1	>=3	>=3	Asthma-Wheeze	Allergic asthma;		atopic	wheeze.rec	0to4	3	normal	low/normal	High	Other	Low	Low	44	30	15	59													Low	OR	1.75	0.37			1.75
Gustafsson	1999	Gustafasson,SWEDEN	prospective cohort	prospective	Total duration of breastfeeding	TBF	?6	<6	6	5to7	1	>=6	>=6	Asthma-Wheeze	Ever Asthma(DD)		atopic	wheeze.rec	0to4	8	normal	low/normal	Unclear	Other	Low	Low					OR	0.9	0.4	1.9			OR				NS		Low	OR	-0.11	0.38			-0.11
Infante-Rivard	1992	Infante-Rivard, C.	CASE CONTROL	retrospective	Ever breastfed	TBF	ever	never	0	0	1	>0	>0	Asthma-Wheeze	Doctor-diagnosed asthma		atopic	wheeze.rec	0to4	3.5	normal	low/normal	Unclear	Other	Low	Low	232.613	224.387	214.79	242.21	OR	1.24	0.93	1.64			OR	1.47	1.02	2.13			Low	OR	0.22	0.14	0.39	0.19	0.39
Dell	2001	National Longitudinal Survey of Children and Youth (NLSCY)	CROSS SECTIONAL	retrospective	Total duration of breastfeeding	TBF	>=2	<2	2	1to2	1	>=2	>=2	Asthma-Wheeze	Doctor diagnosed Asthma		atopic	wheeze.rec	0to4	2	normal	low/normal	Unclear	Other	Low	Low										NOT TESTED	OR	1.11	0.68	1.83		99%ci	Low	OR			0.1	0.19	0.1
Visser	2010	EISL-Netherlands	CROSS SECTIONAL	retrospective	Total duration of breastfeeding	TBF	?6	<6	6	5to7	1	>=6	>=6	Asthma-Wheeze	Recurrent Wheeze		atopic	wheeze.rec	0to4	1	normal	low/normal	Unclear	Other	Low	Low					OR	0.56	0.28	1.11			OR					NOT TESTED	Low	OR	-0.58	0.35			-0.58
Dell	2001	National Longitudinal Survey of Children and Youth (NLSCY)	CROSS SECTIONAL	retrospective	Total duration of breastfeeding	TBF	>6	?6	6	5to7	1	>=6	>=6	Asthma-Wheeze	Doctor diagnosed Asthma		atopic	wheeze.rec	0to4	2	normal	low/normal	Unclear	Other	Low	Low										NOT TESTED	OR	1.62	0.86	3.08		99%ci	Low	OR			0.48	0.25	0.48
Dell	2001	National Longitudinal Survey of Children and Youth (NLSCY)	CROSS SECTIONAL	retrospective	Total duration of breastfeeding	TBF	>9	?9	9	8to12	1	>=9	>=9	Asthma-Wheeze	Doctor diagnosed Asthma		atopic	wheeze.rec	0to4	2	normal	low/normal	Unclear	Other	Low	Low										NOT TESTED	OR	2.39	0.95	6.03		99%ci	Low	OR			0.87	0.47	0.87
Rona	2005	Rona, Chile	retrspective cohort	retrospective	Total duration of breastfeeding	TBF	> 1	<=1	1	1to2	1	>=1	>=1	Asthma-Wheeze	Wheeze+Waking with breathlessness.12mo		atopic	wheeze.rec	ge15	27	normal	low/normal	Unclear	Other	Low	Low											OR	0.66	0.45	0.97	0.036		Low	OR			-0.42	0.2	-0.42
Farooqi	1998	Farooqi, Oxfordshire	prospective cohort	prospective	Ever breastfed	TBF	ever	never	0	0	1	>0	>0	Asthma-Wheeze	Ever Asthma(DD)		atopic	wheeze.rec	ge15	16	normal	low/normal	High	Other	Low	Low					OR	1.09	0.86	1.4							ns		Low	OR	0.09	0.13			0.09
Sears	2002	Dunedin Multidisciplinary Health and Development Research Study	prospective cohort	prospective	duration of total BF	TBF	<1	>=1	1	1to2	2	>=1	Established breast-feeding was defined as breast-feeding from birth and continu- ing for>=4 weeks. We also analyzed outcomes using 3 levels of breast- feeding duration (nil, not breast-fed or breast-fed for less than 4 weeks [reference]; short, breast-fed for between 4 weeks and 24 weeks; and long, breast-fed for longer than 24 weeks	Asthma-Wheeze	Ever Asthma(ICS/excercise)		atopic	wheeze.rec	ge15	26	normal/low	normal	Unclear	Other	Low	Low					OR	1.79	1.34	2.4			OR	1.83	1.35	2.47			Low	OR	0.58	0.15	0.6	0.15	0.6
Sears	2002	Dunedin Multidisciplinary Health and Development Research Study	prospective cohort	prospective	duration of total BF	TBF	<1	>=1	1	1to2	2	>=1	Established breast-feeding was defined as breast-feeding from birth and continu- ing for>=4 weeks. We also analyzed outcomes using 3 levels of breast- feeding duration (nil, not breast-fed or breast-fed for less than 4 weeks [reference]; short, breast-fed for between 4 weeks and 24 weeks; and long, breast-fed for longer than 24 weeks	Asthma-Wheeze	Asthma(ICS/excercise).12mo		atopic	wheeze.rec	5to14	9	normal/low	normal	Unclear	Other	Low	Low					OR	2.54	1.45	4.44			OR	2.4	1.36	4.26			Low	OR	0.93	0.28	0.88	0.29	0.88
Burr	1993	Burr	prospective cohort (of RCT)	prospective	total BF ever/never	TBF	never	ever	0	0	2	>0	>0	WHEEZE	Asthma (diagnosis)'		atopic	wheeze.rec	5to14	7	high	high	High	Other	Low	Low									ns	no significant difference							Low	OR	-0.33	0.21			-0.33
Van Beijstervelft	2008	Van Beijstervelft, Netherlands Twin Register	prospective cohort	prospective	duration of total breastfeeding	TBF	0	> 3	0	0	2	medium	>=3	Asthma-Wheeze	Asthma		atopic	wheeze.rec	5to14	5	normal	low/normal	High	Other	Low	Low					OR	0.92	0.79	1.08									Low	OR	-0.08	0.08			-0.08
Wilson	1998	Dundee infant feeding study	prospective cohort	prospective	Ever breastfed	TBF	never	ever	0	0	2	>0	>0	Asthma-Wheeze	Ever Asthma(DD)		atopic	wheeze.rec	5to14	7	normal	low/normal	High	Other	Low	Low																	Low	OR	-0.06	0.23			-0.06
Nagel (Affluent countries)	2008	ISAAC Phase 2 - Affluent countries	CROSS SECTIONAL	retrospective	Ever breastfed	TBF	never	ever	0	0	2	>0	>0	Asthma-Wheeze	ever Asthma		atopic	wheeze.rec	5to14	12	normal	low/normal	High	Other	Low	Low					OR	0.87	0.78	0.96			OR	0.87	0.78	0.97			Low	OR	-0.14	0.05	-0.14	0.06	-0.14
Nagel (Non Affluent countries)	2008	ISAAC Phase 2- Nonaffluent countries	CROSS SECTIONAL	retrospective	Ever breastfed	TBF	never	ever	0	0	2	>0	>0	Asthma-Wheeze	ever Asthma		atopic	wheeze.rec	5to14	12	normal	low/normal	High	Other	Low	Low					OR	0.93	0.79	1.1			OR	0.89	0.71	1.11			Low	OR	-0.07	0.09	-0.12	0.11	-0.12
Oliveti	1995	Oliveti, J. F.	case control	retrospective	Ever breastfed	TBF	never	ever	0	0	2	>0	>0	Asthma-Wheeze	Doctor diagnosed Asthma		atopic	wheeze.rec	5to14	9	normal	low/normal	High	Other	Low	Low	31.047	99.953	45.064	87.936	OR						OR					NOT TESTED	Low	OR	-0.5	0.28			-0.5
Bergmann	2000	Multicenter Allergy Study (MAS)	prospective cohort	prospective	Total duration of breastfeeding	TBF	<=6	>6	6	5to7	2	>=6	>=6	Asthma-Wheeze	Ever Asthma(DD)		atopic	wheeze.rec	5to14	6	normal	low/normal	High	Other	Low	Low											OR	0.89	0.58	1.368			Low	OR			-0.12	0.22	-0.12
Mihrshahi	2007	Childhood ASTHMA Prevention Study (CAPS)	prospective cohort	prospective	Ever breastfed	TBF	never	ever	0	0	2	>0	>0	Asthma-Wheeze	Ever Asthma(DD)		atopic	wheeze.rec	5to14	5	high	high	Low	Low	Low	Low					OR	0.54	0.29	1.02			OR	0.59	0.3	1.16			Low	OR	-0.62	0.32	-0.53	0.34	-0.53
Mihrshahi	2007	Childhood ASTHMA Prevention Study (CAPS)	prospective cohort	prospective	Total duration of breastfeeding	TBF	< 6	>= 6	6	5to7	2	>=6	>=6	Asthma-Wheeze	Ever Asthma(DD)		atopic	wheeze.rec	5to14	5	high	high	Low	Low	Low	Low					OR	0.85	0.55	1.31			OR	0.9	0.58	1.4			Low	OR	-0.16	0.22	-0.11	0.23	-0.11
Granell	2012	ALSPAC	prospective cohort	prospective	Total duration of breastfeeding	TBF	0	>6	0	0	2	long	>=6	Asthma-Wheeze	persistent wheeze		atopic	wheeze.rec	5to14	7	normal	low/normal	Low	Low	Low	Low					OR	0.62	0.48	0.8			OR	0.78	0.58	1.03			Low	OR	-0.48	0.13	-0.25	0.14	-0.25
Burgess	2006	Mater-University of Queensland Study of Pregnancy	prospective cohort	prospective	Total duration of breastfeeding	TBF	0	> 4	0	0	2	medium	>=4	Asthma-Wheeze	asthma		atopic	wheeze.rec	5to14	14	normal	low/normal	Low	Low	Low	Low					OR	1.03	0.9	1.2		There was no significant relationship found between the duration of breastfeeding and the report of asthma (P .44) (Table 3). joint p value=0.44 for all these 5 categories. Stratification for the child’s gender and reported parental asthma did not affect the relationship between the duration of breastfeeding and the prevalence of asthma. In particular, the rates of asthma were the same for the gi…					ns	Separate addition of maternal asthma, paternal asthma, smoking in early and late pregnancy, frequency of coughs and colds in the first 6 months of life, and annual family income at birth only minimally altered the odds ratio of developing asthma.	Low	OR	0.03	0.08			0.03
Scholtens	2009	PIAMA	prospective cohort	prospective	Total duration of breastfeeding	TBF	0	>3.5	0	0	2	medium	>=4	Asthma-Wheeze	Ever asthma		atopic	wheeze.rec	5to14	8	normal	low/normal	Low	Low	Low	Low											OR	0.65	0.44	0.96			Low	OR	-0.36	0.19	-0.43	0.2	-0.43
Zutavern	2004	ZUTAVERN, A	prospective cohort	prospective	breastfed	TBF	NEVER	EVER	0	0	2	>0	>0	WHEEZE	recurrent wheeze		atopic	wheeze.rec	5to14	5.5	normal	low/normal	Low	Low	Low	Low									0.14	in the paper they call it prevalence at age 5.5 but based on the definition it is not for AD and transiet wheeze	OR	0.78	0.46	1.3		According to the findings from principal component analysis and the significance levels from the univariate analyses, introduction of egg and vegetables as well as breast feeding were incorporated in the multivariate models	Low	OR	-0.31	0.21	-0.25	0.26	-0.25
Granell	2012	ALSPAC	prospective cohort	prospective	Total duration of breastfeeding	TBF	<= 3	>3	3	3to4	2	>=3	>=3	Asthma-Wheeze	persistent wheeze		atopic	wheeze.rec	5to14	7	normal	low/normal	Low	Low	Low	Low					OR	0.68	0.56	0.83			OR	0.79	0.64	0.98			Low	OR	-0.39	0.1	-0.24	0.11	-0.24
Karmaus	2008	Isle of Wight Prevention Study	prospective cohort	prospective	Total duration of breastfeeding	TBF	<3	>=3	3	3to4	2	>=3	>=3	Asthma-Wheeze	Ever Asthma		atopic	wheeze.rec	5to14	10	normal	low/normal	Low	Low	Low	Low											RR	0.83	0.67	1.02			Low	RR			-0.19	0.11	-0.19
Caudri	2013	PIAMA	prospective cohort	prospective	Total duration of breastfeeding	TBF	<=3	>3	3	3to4	2	>=3	>=3	Asthma-Wheeze	Persistent wheeze		atopic	wheeze.rec	5to14	8	normal	low/normal	Low	Low	Low	Low											OR	0.6	0.38	0.93			Low	OR			-0.51	0.22	-0.51
Sunyer	2006	Sunyer, Menorca Spain	prospective cohort	prospective	Total duration of breastfeeding	TBF	<5	=>5	5	5to7	2	>=5	>=5	Asthma-Wheeze	Ever Asthma(DD)		atopic	wheeze.rec	5to14	6.5	normal	low/normal	Low	Low	Low	Low											OR	0.33	0.08	0.87			Low	OR			-1.11	0.49	-1.11
Midodzi	2008	National Longitudinal Survey of Children and Youth	prospective cohort	prospective	Ever breastfed	TBF	never	ever	0	0	2	>0	>0	Asthma-Wheeze	Persistent wheeze		atopic	wheeze.rec	5to14	9	normal	low/normal	Unclear	Other	Low	Low					OR	1.15	0.76	1.75							ns		Low	OR	0.14	0.21			0.14
Rusconi	1999	SIDRIA	CROSS-SECTIONAL	retrospective	Total duration of breastfeeding	TBF	0	>=6	0	0	2	long	>=6	Asthma-Wheeze	Persistent wheezing		atopic	wheeze.rec	5to14	7	normal	low/normal	Unclear	Other	Low	Low					OR	0.87	0.71	1.08			OR	0.89	0.7	1.14			Low	OR	-0.14	0.11	-0.12	0.13	-0.12
Zhu	2012	Zhu	case control	retrospective	breastfeeding yes /no	TBF	no breastfeeding	yes to breastfeeding	0	0	2	>0	>0	Asthma-Wheeze	Asthma		atopic	wheeze.rec	5to14	14	normal	low/normal	Unclear	Other	Low	Low	121	150	225	46	OR	0.471	0.435	0.861	<0.01		OR	0.513	0.418	0.914	<0.01		Low	OR	-0.75	0.31	-0.67	0.29	-0.67
Alper	2006	BURSA TURKEY	CROSS SECTIONAL	retrospective	TOTAL BF DURATION	TBF	< 3	>3	3	3to4	2	>=3	>=3	WHEEZE	Persistant wheezing		atopic	wheeze.rec	5to14	7	normal	low/normal	Unclear	Other	Low	Low	3.965	57.035	57.96	632.04							OR	1.67	0.89	3.14			Low	OR	-0.28	0.54	0.51	0.32	0.51
Tanaka	2009	Fukuoka Child Health Study	CROSS SECTIONAL	retrospective	Total duration of breastfeeding	TBF	<6	?6	6	5to7	2	>=6	>=6	ASTHMA	Asthma		atopic	wheeze.rec	0to4	3	normal	low/normal	High	Other	Low	Low					OR	0.69	0.49	1			OR	0.72	0.5	1.06			Low	OR	-0.37	0.19	-0.33	0.2	-0.33
Miyake	2008	Osaka Maternal and Child Health Study (OMCHS)	prospective cohort	prospective	Total duration of breastfeeding	TBF	< 6	>=6	6	5to7	2	>=6	>=6	Asthma-Wheeze	Ever Asthma(DD)		atopic	wheeze.rec	0to4	2	normal	low/normal	High	Other	Low	Low					OR	0.56	0.27	1.2			OR	0.63	0.29	1.4			Low	OR	-0.58	0.39	-0.46	0.41	-0.46
Schonberger	2005	Prevention of Asthma in Children Study (PREVASC)	prospective cohort	prospective	Total duration of breastfeeding	TBF	<.25	>=0.25	0	0	2	>0	>0	Asthma-Wheeze	wheezing with awakening		atopic	wheeze.rec	0to4	2	high	high	Low	Low	Low	Low											OR	0.35	0.19	0.66			Low	OR			-1.05	0.32	-1.05
Sherriff	2001	ALSPAC	prospective cohort	prospective	Ever breastfed	TBF	never	ever	0	0	2	>0	>0	Asthma-Wheeze	persistent wheeze		atopic	wheeze.rec	0to4	3.5	normal	low/normal	Low	Low	Low	Low					OR	1	0.9	1.2			OR	1.2	0.9	1.5		0.3	Low	OR	0	0.09	0.18	0.11	0.18
Snijders	2008	KOALA	prospective cohort	prospective	total duration of BF	TBF	0	>9	0	0	2	long	>=9	Asthma-Wheeze	recurrent wheezing		atopic	wheeze.rec	0to4	2	normal	low/normal	Low	Low	Low	Low					OR	0.42	0.27	0.68			OR	0.46	0.21	1.02			Low	OR	-0.87	0.25	-0.78	0.41	-0.78
Alm	2008	Infants of Western Sweden	prospective cohort	prospective	Total breastfeeding duration	TBF	<4	>=4	4	3to4	2	>=4	>=4	WHEEZE	RECURRENT WHEEZE		atopic	wheeze.rec	0to4	4	normal	low/normal	Low	Low	Low	Low											OR	0.7	0.5	0.97			Low	OR			-0.36	0.17	-0.36
Kull	2002	BAMSE	prospective cohort	prospective	Total duration of breastfeeding	TBF	< 6	>= 6	6	5to7	2	>=6	>=6	Asthma-Wheeze	Ever Asthma(DD)		atopic	wheeze.rec	0to4	2	normal	low/normal	Low	Low	Low	Low											OR	0.69	0.5	0.95			Low	OR	-0.52	0.15	-0.37	0.16	-0.37
Milner	2004	National Maternal and Infant Health Survey and Longitudinal Follow Up	prospective cohort	prospective	Ever breastfed	TBF	never	ever	0	0	2	>0	>0	Asthma-Wheeze	asthma		atopic	wheeze.rec	0to4	3	normal	low/normal	Unclear	Other	Low	Low					OR	0.61	0.52	0.71									Low	OR	-0.49	0.08			-0.49
Rust	2001	National Health and Nutrition Examination Survey ((NHANES III)	CROSS SECTIONAL	retrospective	Ever breastfed	TBF	never	ever	0	0	2	>0	>0	Asthma-Wheeze	Asthma		atopic	wheeze.rec	0to4	<6	normal	low/normal	Unclear	Other	Low	Low	155	229	3161	3233							OR	0.89	0.47	1.66		Linear regression modeling revealed that duration of breastfeeding was not a predictor of age at onset of asthma, 3 = 0.01, p = 0.53.	Low	OR	-0.37	0.11	-0.12	0.32	-0.12
Han	2009	Han	CROSS SECTIONAL	retrospective	Ever breastfed	TBF	never	ever	0	0	2	>0	>0	Asthma-Wheeze	Asthma		atopic	wheeze.rec	ge15	15	normal	low/normal	High	Other	Low	Low	711	954	7999	11649	OR				0.001		OR	1.11	1	1.23			Low	OR	0.08	0.05	0.1	0.05	0.1
Kurt	2007	Prevalence and Risk Factors of Allergies in Turkey (PARFAIT)	CROSS SECTIONAL	retrospective	Ever breastfed	TBF	never	ever	0	0	2	>0	>0	Asthma-Wheeze	Asthma		atopic	wheeze.rec	ge15	15	normal	low/normal	Low	Low	Low	Low					OR						OR	0.92	0.86	0.99	<0.05		Low	OR			-0.08	0.04	-0.08
Kurt	2007	Prevalence and Risk Factors of Allergies in Turkey (PARFAIT)	CROSS SECTIONAL	retrospective	Total duration of breastfeeding	TBF	<6	?6	6	5to7	2	>=6	>=6	Asthma-Wheeze	Asthma		atopic	wheeze.rec	ge15	15	normal	low/normal	Low	Low	Low	Low					OR	0.79	0.71	0.89			OR						Low	OR	-0.24	0.06			-0.24
Takemura	2002	The Tokorozawa Childhood Asthma and Pollinosis Study	CROSS SECTIONAL	retrospective	Ever breastfed	TBF	never	ever	0	0	2	>0	>0	Asthma-Wheeze	Asthma		atopic	wheeze.rec	ge15	15	normal	low/normal	Unclear	Other	Low	Low	1958	357	17754	3759	OR						OR						Low	OR	0.15	0.06			0.15
Muiño	2008	Muino, Perlotas Brazil	prospective cohort	prospective	Total duration of breastfeeding	TBF	<1	4-8.9	1	1to2	2	medium	4TO9	Asthma-Wheeze	persistent wheezing		atopic	wheeze.rec	5to14	12	normal	low/normal	High	Other	Low	Low					fisher's exact tests					0.04 p vlue for all categories							Low	OR	-0.14	0.31			-0.14
Rothenbacher	2005	Rothenbacher, Ulm University	prospective cohort	prospective	Total duration of breastfeeding	TBF	0	>0	0	0	2	>=0	>=0	Asthma-Wheeze	Ever Asthma(DD)		atopic	wheeze.rec	0to4	2	normal	low/normal	Low	Low	Low	Low																	Low	OR	-0.1	0.3			-0.1
Rothenbacher	2005	Rothenbacher, Ulm University	prospective cohort	prospective	Total duration of breastfeeding	TBF	<3	>=3	3	3to4	2	>=3	>=3	Asthma-Wheeze	Ever Asthma(DD)		atopic	wheeze.rec	0to4	2	normal	low/normal	Low	Low	Low	Low																	Low	OR	-0.78	0.25			-0.78
Morales	2012	INMA PROJECT	prospective cohort	prospective	Total duration of breastfeeding	TBF	0	>6	0	0	2	>=0	>=0	Asthma-Wheeze	Reccurent Wheeze		atopic	wheeze.rec	0to4	1	normal	low/normal	Unclear	Other	Low	Low																	Low	OR	-0.99	0.26			-0.99
Lewis (BSC58)	1996	British Cohort Study (BCS58)	prospective cohort	prospective	total duration of BF	TBF	0	>1	0	0	2	>0	>0	Asthma-Wheeze	asthma last 12 months		atopic	wheeze.rec	ge15	16	normal	low/normal	High	Other	Low	Low																	Low	OR	-0.22	0.11			-0.22
Lewis (BSC70)	1996	British Cohort Study (BCS70)	prospective cohort	prospective	total duration of BF	TBF	0	>1	0	0	2	>0	>0	Asthma-Wheeze	asthma last 12 months		atopic	wheeze.rec	ge15	16	normal	low/normal	High	Other	Low	Low																	Low	OR	0	0.1			0
Fredriksson	2007	Friedriksson, Espoo city	prospective cohort	prospective	Total duration of breastfeeding	TBF	2017-09-07	0-3	3	3to4	1	long	7TO9	Asthma-Wheeze	Wheezing.12mo		atopic	wheeze	5to14	15	normal	low/normal	Unclear	Other	Low	Low											OR	1.64	0.77	3.52			Low	OR	0.31	0.37	0.49	0.39	0.49
Alho	1990	RANTAKALLIO P.	prospective cohort	prospective	Total duration of breastfeeding	TBF	>=12	<3	3	3to4	1	long	>=12	Asthma-Wheeze	"wheezy bronchitis"		atopic	wheeze	0to4	2	normal	low/normal	High	Other	Low	Low					OR	1.5	1.1	1.9	0.006								Low	OR	0.41	0.12			0.41
van der Voort	2012	GENERATION R STUDY	prospective cohort	prospective	Total duration of breastfeeding	TBF	>=6	0	0	0	1	long	6	Asthma-Wheeze	Wheeze.12mo		atopic	wheeze	0to4	1	normal	low/normal	Low	Low	Low	Low					OR	1.66	1.29	2.14								Analysesfocused on these symptoms per year showedthat childrenwho had been breastfed for shorter periods had increased risks of wheezing at 1, 2 and 3 yrs (p,0.05) (fig. 1a). A nonsignificant trend in the same directionwas observed at the age of 4 yrs.	Low	OR	0.51	0.13			0.51
van den Voort	2012	GENERATION R STUDY	prospective cohort	prospective	Total duration of breastfeeding	TBF	>=6	0-3	3	3to4	1	long	>=6	Asthma-Wheeze	Wheeze.12mo		atopic	wheeze	0to4	1	normal	low/normal	Low	Low	Low	Low					OR	1.33	1.12	1.57								Analysesfocused on these symptoms per year showedthat childrenwho had been breastfed for shorter periods had increased risks of wheezing at 1, 2 and 3 yrs (p,0.05) (fig. 1a). A nonsignificant trend in the same directionwas observed at the age of 4 yrs.	Low	OR	0.29	0.08			0.29
Alm	2008	Infants of Western Sweden	prospective cohort	prospective	Total breastfeeding duration	TBF	>9	0-4	4	3to4	1	long	>=9	WHEEZE	Wheeze		atopic	wheeze	0to4	1	normal	low/normal	Low	Low	Low	Low					OR	1.5	1.2	1.8	<0.001		OR	1.3	1.1	1.7			Low	OR	0.41	0.09	0.26	0.14	0.26
Dell	2001	National Longitudinal Survey of Children and Youth (NLSCY)	CROSS SECTIONAL	retrospective	Total duration of breastfeeding	TBF	>=2	<2	2	1to2	1	>=2	>=2	Asthma-Wheeze	Wheeze		atopic	wheeze	0to4	2	normal	low/normal	Unclear	Other	Low	Low					OR					NOT TESTED	OR	1.01	0.77	1.33		99%ci	Low	OR			0.01	0.11	0.01
Visser	2010	EISL-Netherlands	CROSS SECTIONAL	retrospective	Total duration of breastfeeding	TBF	?6	<6	6	5to7	1	>=6	>=6	Asthma-Wheeze	Wheeze Ever		atopic	wheeze	0to4	1	normal	low/normal	Unclear	Other	Low	Low					OR	0.63	0.39	1.01			OR	0.63	0.36	1.08	<0.05		Low	OR	-0.46	0.24	-0.46	0.27	-0.46
Dell	2001	National Longitudinal Survey of Children and Youth (NLSCY)	CROSS SECTIONAL	retrospective	Total duration of breastfeeding	TBF	>6	?6	6	5to7	1	>=6	>=6	Asthma-Wheeze	Wheeze		atopic	wheeze	0to4	2	normal	low/normal	Unclear	Other	Low	Low					OR					NOT TESTED	OR	1.34	0.98	1.83		99%ci	Low	OR			0.29	0.12	0.29
Dell	2001	National Longitudinal Survey of Children and Youth (NLSCY)	CROSS SECTIONAL	retrospective	Total duration of breastfeeding	TBF	>9	?9	9	8to12	1	>=9	>=9	Asthma-Wheeze	Wheeze		atopic	wheeze	0to4	2	normal	low/normal	Unclear	Other	Low	Low					OR					NOT TESTED	OR	1.54	1.04	2.29		99%ci	Low	OR			0.43	0.2	0.43
Menezes	2008	Pelotas birth cohort	prospective cohort	prospective	Total duration of breastfeeding	TBF	>=12	<1	1	1to2	1	long	>=12	Asthma-Wheeze	Wheeze.12mo		atopic	wheeze	ge15	22	normal	low/normal	Low	Low	Low	Low					OR	0.87	0.68	1.11			OR	0.85	0.66	1.08			Low	OR	-0.14	0.12	-0.16	0.12	-0.16
Rona	2005	Rona, Chile	retrspective cohort	retrospective	Total duration of breastfeeding	TBF	> 1	<=1	1	1to2	1	>=1	>=1	Asthma-Wheeze	Wheeze.12mo		atopic	wheeze	ge15	27	normal	low/normal	Unclear	Other	Low	Low											OR	0.64	0.43	0.94	0.023		Low	OR			-0.45	0.2	-0.45
Wilson	1998	Dundee infant feeding study	prospective cohort	prospective	Ever breastfed	TBF	never	ever	0	0	2	>0	>0	Asthma-Wheeze	Ever Wheeze		atopic	wheeze	5to14	7	normal	low/normal	High	Other	Low	Low																	Low	OR	-0.06	0.23			-0.06
Nagel (Affluent countries)	2008	ISAAC Phase 2 - Affluent countries	CROSS SECTIONAL	retrospective	Ever breastfed	TBF	never	ever	0	0	2	>0	>0	Asthma-Wheeze	Wheeze		atopic	wheeze	5to14	12	normal	low/normal	High	Other	Low	Low					OR	0.89	0.81	0.99			OR	0.87	0.78	0.97			Low	OR	-0.12	0.05	-0.14	0.06	-0.14
Nagel (Non Affluent countries)	2008	ISAAC Phase 2- Nonaffluent countries	CROSS SECTIONAL	retrospective	Ever breastfed	TBF	never	ever	0	0	2	>0	>0	Asthma-Wheeze	Wheeze		atopic	wheeze	5to14	12	normal	low/normal	High	Other	Low	Low					OR	0.81	0.7	0.95			OR	0.8	0.68	0.94			Low	OR	-0.21	0.08	-0.22	0.08	-0.22
Miyake	2003	Miyake, Osaka City	CROSS SECTIONAL	retrospective	Total duration of breastfeeding	TBF	0	>=3	0	0	2	medium	>=3	Asthma-Wheeze	WHEEZE		atopic	wheeze	5to14	15	normal	low/normal	High	Other	Low	Low					OR	0.87	0.59	1.33			OR	0.86	0.58	1.31			Low	OR	-0.14	0.22	-0.15	0.21	-0.15
Camara	2003	Camara, A. A.	CASE CONTROL	retrospective	Total duration of breastfeeding	TBF	<6	?6	6	5to7	2	>=6	>=6	Asthma-Wheeze			atopic	wheeze	5to14	12	normal	low/normal	High	Other	Low	Low	12	44	11	24	OR						OR						Low	OR	-0.52	0.49			-0.52
Burr	1993	Burr	prospective cohort	prospective	Ever breastfed	TBF	never	ever	0	0	2	>0	>0	Asthma-Wheeze	Wheeze		atopic	wheeze	5to14	6	high	high	Low	Low	Low	Low									<.001								Low	OR	-0.68	0.21			-0.68
Scholtens	2009	PIAMA	prospective cohort	prospective	Total duration of breastfeeding	TBF	0	>3.5	0	0	2	medium	>=4	Asthma-Wheeze	Wheeze.12mo		atopic	wheeze	5to14	8	normal	low/normal	Low	Low	Low	Low											OR	0.66	0.42	1.04		The longitudinal analyses accounting for repeated measure- ments (GEE) showed that breast feeding for .16 weeks, compared with no breastfeeding, was associated with a lower risk of wheeze (Supplementary fig S3) and asthma (fig 1) in all years, although not significantly at each year.	Low	OR	-0.34	0.22	-0.42	0.23	-0.42
Elliott	2008	ALSPAC	prospective cohort	prospective	Ever breastfed	TBF	never	ever	0	0	2	>0	>0	Asthma-Wheeze	Wheeze.12mo		atopic	wheeze	5to14	7.5	normal	low/normal	Unclear	Other	Low	Low					OR	0.95	0.8	1.14			OR	0.96	0.79	1.16			Low	OR	-0.05	0.09	-0.04	0.1	-0.04
Lewis	1995	British Cohort Study (BCS70)	prospective cohort	prospective	Ever breastfed	TBF	never	ever	0	0	2	>0	>0	Asthma-Wheeze	Ever Wheeze		atopic	wheeze	5to14	5	normal	low/normal	Unclear	Other	Low	Low											OR	0.9	0.82	0.99			Low	OR	-0.16	0.05	-0.11	0.05	-0.11
Awasthi	2004	ISAAC Phase 3? - Lucknow, India	CROSS SECTIONAL	retrospective	Ever breastfed	TBF	never	ever	0	0	2	>0	>0	Asthma-Wheeze	Wheeze		atopic	wheeze	5to14	7	normal	low/normal	Unclear	Other	Low	Low					OR	0.59	0.38	0.92			OR	0.62	0.37	1.03			Low	OR	-0.53	0.23	-0.48	0.26	-0.48
Wang	2006	Wang	cross-sectional	retrospective	Whether baby was breastfed	TBF	breastfed YES or NO		0	0	2	>0	>0	Asthma-Wheeze	Recent wheezing		atopic	wheeze	5to14	10Y	normal	low/normal	Unclear	Other	Low	Low											OR	0.79	0.66	0.96			Low	OR			-0.24	0.1	-0.24
Alper	2006	BURSA TURKEY	CROSS SECTIONAL	retrospective	TOTAL BF DURATION	TBF	< 3	>3	3	3to4	2	>=3	>=3	WHEEZE	Wheeze in first 3 years		atopic	wheeze	5to14	7	normal	low/normal	Unclear	Other	Low	Low	17.976	150.024	57.96	632.04							OR	1.55	1.02	2.37	< 0.05		Low	OR	0.27	0.28	0.44	0.22	0.44
Hide	1981	The Isle of Wight Prevention study	prospective cohort	prospective	Ever breastfed	TBF	never	ever	0	0	2	>0	>0	Asthma-Wheeze	Ever Asthma		atopic	wheeze	0to4	1	normal	low/normal	High	Other	Low	Low																	Low	OR	-0.51	0.25			-0.51
Tanaka	2009	Fukuoka Child Health Study	CROSS SECTIONAL	retrospective	Total duration of breastfeeding	TBF	<6	?6	6	5to7	2	>=6	>=6	Asthma-Wheeze	Wheeze		atopic	wheeze	0to4	3	normal	low/normal	High	Other	Low	Low					OR	0.81	0.63	1.05			OR	0.83	0.63	1.09			Low	OR	-0.21	0.13	-0.19	0.14	-0.19
Miyake	2008	Osaka Maternal and Child Health Study (OMCHS)	prospective cohort	prospective	Total duration of breastfeeding	TBF	< 6	>=6	6	5to7	2	>=6	>=6	Asthma-Wheeze	Wheeze.12mo		atopic	wheeze	0to4	2	normal	low/normal	High	Other	Low	Low					OR	1.13	0.76	1.7			OR	1.19	0.78	1.84			Low	OR	0.12	0.21	0.17	0.22	0.17
Hide	1981	The Isle of Wight Prevention study	prospective cohort	prospective	Total duration of breastfeeding	TBF	<6	6	6	5to7	2	>=6	>=6	Asthma-Wheeze	Ever Asthma		atopic	wheeze	0to4	1	normal	low/normal	High	Other	Low	Low																	Low	OR	-0.51	0.25			-0.51
Wright	2002	part of a metropolitan Boston prospective birth cohort study	prospective cohort	prospective	Ever breastfed	TBF	never	ever	0	0	2	>0	>0	Asthma-Wheeze	Ever Wheeze		atopic	wheeze	0to4	0-1	high	high	Low	Low	Low	Low					RR	0.71	0.49	1.02			RR				ns		Low	RR	-0.34	0.18			-0.34
Burr	1989	Burr	prospective cohort	prospective	Ever breastfed	TBF	never	ever	0	0	2	>0	>0	Asthma-Wheeze	Ever Wheeze		atopic	wheeze	0to4	1	high	high	Low	Low	Low	Low									< 0.001		OR	0.53	0.33	0.86			Low	OR	-0.98	0.21	-0.63	0.25	-0.63
Schonberger	2005	Prevention of Asthma in Children Study (PREVASC)	prospective cohort	prospective	Total duration of breastfeeding	TBF	<.25	>=0.25	0	0	2	>0	>0	Asthma-Wheeze	Wheeze		atopic	wheeze	0to4	2	high	high	Low	Low	Low	Low											OR	0.42	0.18	0.97			Low	OR			-0.87	0.43	-0.87
Oddy	2003	Western Australia Pregnancy Cohort	prospective cohort	prospective	Ever breastfed	TBF	never	ever	0	0	2	>0	>0	Asthma-Wheeze	Ever Wheeze		atopic	wheeze	0to4	1	normal	low/normal	Low	Low	Low	Low					OR	1.61	1.13	2.29			OR	1.61	1.05	2.48			Low	OR	0.48	0.18	0.48	0.22	0.48
Zutavern	2004	ZUTAVERN, A	prospective cohort	prospective	breastfed	TBF	NEVER	EVER	0	0	2	>0	>0	WHEEZE	wheeze		atopic	wheeze	0to4	2	normal	low/normal	Low	Low	Low	Low									0.27	in the paper they call it prevalence at age 5.5 but based on the definition it is not for AD and transiet wheeze	OR	0.92	0.61	1.4		According to the findings from principal component analysis and the significance levels from the univariate analyses, introduction of egg and vegetables as well as breast feeding were incorporated in the multivariate models	Low	OR	-0.2	0.18	-0.08	0.21	-0.08
Oddy	2003	Western Australia Pregnancy Cohort	prospective cohort	prospective	Total duration of breastfeeding	TBF	<2	>=2	2	1to2	2	>=2	>=2	Asthma-Wheeze	Ever Wheeze		atopic	wheeze	0to4	1	normal	low/normal	Low	Low	Low	Low					OR	1.72	1.33	2.29			OR	1.6	1.14	2.24			Low	OR	0.54	0.15	0.47	0.17	0.47
Oddy	2003	Western Australia Pregnancy Cohort	prospective cohort	prospective	Total duration of breastfeeding	TBF	<4	>=4	4	3to4	2	>=4	>=4	Asthma-Wheeze	Ever Wheeze		atopic	wheeze	0to4	1	normal	low/normal	Low	Low	Low	Low					OR	1.81	1.41	2.33			OR	1.56	1.14	2.12			Low	OR	0.59	0.13	0.44	0.16	0.44
Kull	2002	BAMSE	prospective cohort	prospective	Total duration of breastfeeding	TBF	< 6	>= 6	6	5to7	2	>=6	>=6	Asthma-Wheeze	Ever Wheeze		atopic	wheeze	0to4	2	normal	low/normal	Low	Low	Low	Low											OR	0.81	0.67	0.97			Low	OR	-0.27	0.09	-0.21	0.09	-0.21
Galbally	2013	Longitudinal Study of Australian Children	prospective cohort	prospective	Total duration of breastfeeding	TBF	<6	6	6	5to7	2	>=6	6	Asthma-Wheeze	Ever Wheeze		atopic	wheeze	0to4	1	normal	low/normal	Low	Low	Low	Low											OR	0.65	0.45	0.92			Low	OR	-0.84	0.15	-0.43	0.18	-0.43
Oddy	2003	Western Australia Pregnancy Cohort	prospective cohort	prospective	Total duration of breastfeeding	TBF	<6	>=6	6	5to7	2	>=6	>=6	Asthma-Wheeze	Ever Wheeze		atopic	wheeze	0to4	1	normal	low/normal	Low	Low	Low	Low					OR	1.9	1.46	2.48			OR	1.6	1.17	2.17			Low	OR	0.64	0.14	0.47	0.16	0.47
Oddy	2003	Western Australia Pregnancy Cohort	prospective cohort	prospective	Total duration of breastfeeding	TBF	<8	>=8	8	8to12	2	>=8	>=8	Asthma-Wheeze	Ever Wheeze		atopic	wheeze	0to4	1	normal	low/normal	Low	Low	Low	Low					OR	1.92	1.46	2.52			OR	1.76	1.27	2.44			Low	OR	0.65	0.14	0.57	0.17	0.57
Elliott	2008	ALSPAC	prospective cohort	prospective	Ever breastfed	TBF	never	ever	0	0	2	>0	>0	Asthma-Wheeze	Wheeze.12mo		atopic	wheeze	0to4	3	normal	low/normal	Unclear	Other	Low	Low					OR	0.72	0.66	0.8			OR	0.88	0.79	0.97			Low	OR	-0.33	0.05	-0.13	0.05	-0.13
Morales	2012	INMA PROJECT	prospective cohort	prospective	Total duration of breastfeeding	TBF	0	>6	0	0	2	long	>=6	Asthma-Wheeze	Ever Wheeze		atopic	wheeze	0to4	1	normal	low/normal	Unclear	Other	Low	Low					OR	1.01	0.53	1.92			OR	1.15	0.58	2.28			Low	OR	0.01	0.33	0.14	0.35	0.14
Rust	2001	National Health and Nutrition Examination Survey ((NHANES III)	CROSS SECTIONAL	retrospective	Total duration of breastfeeding	TBF	never	ever	0	0	2	>0	>0	Asthma-Wheeze	Wheeze		atopic	wheeze	0to4	<6	normal	low/normal	Unclear	Other	Low	Low	806	843	2510	2620													Low	OR	0	0.06			0
Kurt	2008	Prevalence and Risk Factors of Allergies in Turkey (PARFAIT)	CROSS SECTIONAL	retrospective	Ever breastfed	TBF	never	ever	0	0	2	>0	>0	Asthma-Wheeze	Wheeze		atopic	wheeze	ge15	15	normal	low/normal	Low	Low	Low	Low					OR						OR	0.93	0.87	0.99	<0.05		Low	OR			-0.07	0.03	-0.07
Kurt	2008	Prevalence and Risk Factors of Allergies in Turkey (PARFAIT)	CROSS SECTIONAL	retrospective	Total duration of breastfeeding	TBF	<6	?6	6	5to7	2	>=6	>=6	Asthma-Wheeze	Wheeze		atopic	wheeze	ge15	15	normal	low/normal	Low	Low	Low	Low					OR	0.82	0.73	0.92			OR						Low	OR	-0.2	0.06			-0.2
Muiño	2008	Muino, Perlotas Brazil	prospective cohort	prospective	Total duration of breastfeeding	TBF	<1	>9	1	1to2	2		>=1	Asthma-Wheeze	Ever Wheeze		atopic	wheeze	5to14	12	normal	low/normal	High	Other	Low	Low					fisher's exact tests					0.006 p vlue for all categories							Low	OR	-0.22	0.16			-0.22
Wahlberg	2006	ABIS (All Babies in Southeast Sweden)	prospectvie cohort	prospective	Total BF duration	TBF	0-1	2+	1	1to2	2	>=1	>=1	DM	GADA and/or IA2A at 1 and 2 yo	TIDM-Ab	autoim	TIDM	auto	2	normal	low/normal	High	Other	Low	Low																variables did not remained in the step-wise logistic regression	Low	OR	-1.35	0.49			-1.35
Wahlberg	2006	ABIS (All Babies in Southeast Sweden)	prospectvie cohort	prospective	Total BF duration	TBF	0-5	5+	5	5to7	2	>=5	>=5	DM	GADA and/or IA2A at 1 and 2 yo	TIDM-Ab	autoim	TIDM	auto	2	normal	low/normal	High	Other	Low	Low																variables did not remained in the step-wise logistic regression	Low	OR	-0.16	0.46			-0.16
Viner	2008	Birtish Cohort Study	prospectvie cohort	prospective	Total BF duration	TBF	0	3+	0	0	2	medium	>=3	DM	IDDM, self reported	TIDM	autoim	TIDM	auto	>10	normal	low/normal	High	Other	Low	Low											HR	1.3	0.4	4.9	0.7		Low	HR			0.26	0.68	0.26
Couper	2009	Australian BABYDIAB	prospective cohort	prospective	Total BF duration	TBF	0	3+	0	0	2	medium	>=3	DM	Islet autoimmunity defined as persistent elevation of one or more islet autoantibodies on consecutive 6 month tests.	TIDM-Ab	autoim	TIDM	auto	1.7	high	high	High	Other	Low	Low					HR	1.07527	0.37037	3.125	0.49	OVERL ALL P VALUE INCLUDING UNKNOW/MISSING EXPOSURES WHO WERE ANALYZED						it says adjusted analyses was done - no results shown	Low	HR	0.07	0.54			0.07
Couper	2009	Australian BABYDIAB	prospective cohort	prospective	Total BF duration	TBF	0-3	3+	3	3to4	2	>=3	>=3	DM	Islet autoimmunity defined as persistent elevation of one or more islet autoantibodies on consecutive 6 month tests.	TIDM-Ab	autoim	TIDM	auto	1.7	high	high	High	Other	Low	Low					HR	1.21951	0.52356	2.85714		OVERL ALL P VALUE INCLUDING UNKNOW/MISSING EXPOSURES WHO WERE ANALYZED						it says adjusted analyses was done - no results shown	Low	HR	0.2	0.43			0.2
Fronczak	2003	DAISY (Diabetes Autoimmunity Study in the Young)	prospective cohort	prospective	Total BF duration	TBF	0-3	3+	3	3to4	2	>=3	>=3	DM	Islet autoimmunity	TIDM-Ab	autoim	TIDM	auto	4	high	high	High	Other	Low	Low					HR	0.769231	0.280899	2.12766	0.619							We used parametric survival analysis (PROC LIFEREG) and specified the Weibull distribution to estimate all uni- variate and adjusted hazard ratios (HRs) and calculated corresponding approxi- mate 95% CI (33,34).Variables were retained in the final model if their exclusion would have resulted in a >10%change in the magnitude of theHR for the dietary variable of interest.	Low	HR	-0.26	0.52			-0.26
Ziegler	2003	German BABYDIAB	prospective cohort	prospective	Total BF duration	TBF	0	3.1-6	0	0	2	medium	3TO6	DM	IAA, GADA or IA2 >99th percentile	TIDM-Ab	autoim	TIDM	auto	5	high	high	Low	Low	Low	Low					Hazard ratio	2	0.909091	5			Hazard ratio	1.66667	0.833333	3.33333	0.13	overall p=.36	Low	HR	0.69	0.47	0.51	0.35	0.51
Ziegler	2003	German BABYDIAB	prospective cohort	prospective	Total BF duration	TBF	0.1-3	3.1-6	3	3to4	2	medium	3TO6	DM	IAA, GADA or IA2 >99th percentile	TIDM-Ab	autoim	TIDM	auto	5	high	high	Low	Low	Low	Low					Hazard ratio	1.42857	0.714286	2.5			Hazard ratio	1.25	0.666667	2.5	0.44		Low	HR	0.36	0.29	0.22	0.35	0.22
Holmberg	2007	ABIS (All Babies in Southeast Sweden)	prospective cohort	prospective	Total BF duration	TBF	0-3	4+	3	3to4	2	>=3	>=3	DM	GADA, IAA 95th	TIDM-Ab	autoim	TIDM	auto	5.5	normal	low/normal	High	Other	Low	Low					OR	0.48	0.33	0.69	<0.01		OR		-	-	-	regression not done	Low	OR	-0.73	0.19			-0.73
Virtanen	2011	DIPP (Type 1 Diabetes Prediction and Prevention Project)	prospective cohort	prospective	Total BF duration	TBF	0-5	9+	5	5to7	2	long	>=9	DM	Advanced beta cell autoimmunity defeined as being positive for ICA plus at elast one antibody endpoint (IAA, GADA, IA2A) OR clinical T1DM.	TIDM-Ab	autoim	TIDM	auto	6-18	high	high	Low	Low	Low	Low											HR	0.714286	0.515464	0.990099	0.123		Low	HR	-0.13	0.16	-0.34	0.17	-0.34
Savilahti	2009	Savilhati, E.	nested case-control	nested CC		TBF	<6	?6	6	5to7	2	>=6	>=6	DM	Medical diagnosis	TIDM	autoim	TIDM	auto	11.5	normal	low/normal	High	Other	Low	Low					OR	1.05	0.77	1.43									Low	OR	0.05	0.16			0.05
Kyvik	1992	Kyvik, K. O.	nested case-control	nested CC	Total BF duration	TBF	0	5+	0	0	2	medium	>=5	DM	Medical diagnosis	TIDM	autoim	TIDM	auto	<20	normal	low/normal	High	Other	Low	Low		3		9	OR	1.51515	0.396825	5.88235									Low	OR	0.42	0.69			0.42
Kyvik	1992	Kyvik, K. O.	nested case-control	nested CC	Total BF duration	TBF	0-1	5+	1	1to2	2	medium	>=5	DM	Medical diagnosis	TIDM	autoim	TIDM	auto	<20	normal	low/normal	High	Other	Low	Low		11		21	OR	1.07527	0.529101	2.17391									Low	OR	0.07	0.36			0.07
Norris	1996	DAISY (Diabetes Autoimmunity Study in the Young)	nested case-control	nested CC		TBF	Not breast fed	Breast fed	0	0	2	>0	>0	DM	1+ of IAA, GADA, or IA2A	TIDM-Ab	autoim	TIDM	auto	<7	High	high	Low	Low	Low	Low	16	2	132	21							OR	1.27	0.27	5.95			Low	OR	0.24	0.79	0.24	0.79	0.24
Jones	1998	Oxford Record Linkage Study	nested case-control	nested CC	BF at discharge	TBF	Not breast fed	Breast fed	0	0	2	>0	>0	DM	Medical diagnosis	TIDM	autoim	TIDM	auto	5TO9	normal	low/normal	High	Other	Low	Low					OR	0.030303	0.42735	1.31579								wrong confounding risk of bias- high risk is correct (they used conditional matched logistic regression but not conditional multiple log.regr)	Low	OR	-0.28	0.3			-0.28
Glathaar	1988	Glatthaar, C.	cross-sectional	retrospective	Total BF duration	TBF	0-0.25	0.25+	0	0	2	>0	>0	DM	Medical diagnosis	TIDM	autoim	TIDM	auto	<18	normal	low/normal	Unclear	Other	Low	Low	183	10	728	25							OR	0.714286	0.512821	1	0.05		Low	OR	-0.46	0.38	-0.34	0.17	-0.34
Alves	2012	Alves, J. G. B.	case control	retrospective	BF present/absent	TBF	Not breast fed	Breast fed	0	0	2	>0	>0	DM	T1DM diagnosis using WHO criteria	TIDM	autoim	TIDM	auto	6.7	normal	low/normal	High	Other	Low	Low	116	7	122	1	OR	0.135831			0.07	0.07						To ascertain the possible confounding effects of birth weight and age at exposure to cow’s milk, cereals, and solid foods on the duration of breastfeeding, regression models were fitted using the Generalized Estimation Equations method, with an unstructured correlation matrix and SE robust option. This method estimates model coefficients and SEs, adjusting for the correlation within each case–con…	Low	OR	-2	1.08			-2
Ahabi	2011	Ahadi, M.	case control	retrospective	Total BF duration	TBF	0-12	12+	12	8to12	2	>=12	>=12	DM	T1DM diagnosis using WHO criteria	TIDM	autoim	TIDM	auto	6.7	normal	low/normal	Unclear	Other	Low	Low	72	29	87	14	OR	0.399524			0.009						NS-While univariable analysis revealed total durations of breast feeding of more than 12 months to have a protective effect against the development of T1DM, such associations were not present on the multivariable analysis	Univariable and multivariable conditional logistic regression methods were also performed. Variables which were related to diabetes at significance level of p value < 0.1 in univariable analysis were entered into the multivariable analysis. The level p < 0.05 was con- sidered as the cut-off value for significance.	Low	OR	-0.92	0.36			-0.92
Blom	1989	Swedish Childhood Diabetes Study	case control	retrospective	Total BF duration	TBF	Not breast fed	Breast fed	0	0	2	>0	>0	DM	Medical diagnosis of T1DM	TIDM	autoim	TIDM	auto	7	normal	low/normal	High	Other	Low	Low	308.49	30.51	459.36	68.64												As the incidence of Type 1 diabetes in age-dependent, the odds ratios given are age-adjusted according to the direct method.	Low	OR	0.41	0.23			0.41
Blom	1989	Swedish Childhood Diabetes Study	case control	retrospective	Exclusive BF duration	TBF	0-3	3+	3	3to4	2	>=3	>=3	DM	Medical diagnosis of T1DM	TIDM	autoim	TIDM	auto	7	normal	low/normal	High	Other	Low	Low					OR	0.588235	0.346021	0.980392								As the incidence of Type 1 diabetes in age-dependent, the odds ratios given are age-adjusted according to the direct method.	Low	OR	-0.53	0.26			-0.53
Sadauskaite-Kuehne (Sweden)	2004	DEBS (Diaberes and Environment at the Baltic Sea)	case control	retrospective	BF present/absent	TBF	0-7	7+	7	5to7	2	>=7	>=7	DM	Medical diagnosis	TIDM	autoim	TIDM	auto	7	normal	low/normal	High	Other	Low	Low	166		420		OR	0.68	0.48	0.96			OR	0.56	0.38	0.84			Low	OR			-0.58	0.21	-0.58
Sadauskaite-Kuehne (Sweden)	2004	DEBS (Diaberes and Environment at the Baltic Sea)	case control	retrospective	Exclusive BF duration	TBF	0-9	9+	9	8to12	2	>=9	>=9	DM	Medical diagnosis	TIDM	autoim	TIDM	auto	7	normal	low/normal	High	Other	Low	Low	92		174		OR	0.65	0.44	0.96			OR	0.61	0.41	0.92			Low	OR			-0.49	0.21	-0.49
Hathout	2006	Hathout, E. H.	case control	retrospective	Total BF duration	TBF	Not breast fed	Breast fed	0	0	2	>0	>0	DM	Medical diagnosis	TIDM	autoim	TIDM	auto	7.4	normal	low/normal	Unclear	Other	Low	Low	60.18	41.82	234	66					0.001							primary exposure ozone: model adjusted for BF but coefficient for Bf is not shown	Low	OR	-0.9	0.24			-0.9
Tai	1998	Tai, T. Y.	case control	retrospective	BF present/absent	TBF	Not breast fed	Breast fed	0	0	2	>0	>0	DM	Medical diagnosis	TIDM	autoim	TIDM	auto	8.3	normal	low/normal	High	Other	Low	Low	46	70	82	109	OR	0.699301	0.404858	1.20482								BF ever not tested becaused not significant in univariate analysis. Multiple logistic regression analysis was then carried out by including risk factors which were statistically significant in univariate analyses as well as those reported in other studies in the model.	Low	OR	-0.36	0.28			-0.36
Verge	1994	Verge, C. F.	case control	retrospective	AGE AT SOLID FOOD INTRO	TBF	0-2	7+	2	1to2	2	long	>=7	DM	Medical diagnosis	TIDM	autoim	TIDM	auto	9	normal	low/normal	High	Other	Low	Low	62	85	86	69	OR	0.59	0.37	0.92			OR	0.68	0.42	1.09			Low	OR	-0.53	0.23	-0.39	0.24	-0.39
Skrodeniene	2010	DEBS (Diaberes and Environment at the Baltic Sea)	case control	retrospective	BF present/absent	TBF	0-3	3+	3	3to4	2	>=3	>=3	DM	Medical diagnosis	TIDM	autoim	TIDM	auto	9	normal	low/normal	Unclear	Other	Low	Low											OR	0.289017	0.0952381	0.877193	0.028		Low	OR			-1.24	0.57	-1.24
Strotmeyer	2004	Strotmeyer, E. S.	case control	retrospective	BF present/absent	TBF	Not breast fed	Breast fed	0	0	2	>0	>0	DM	Medical diagnosis	TIDM	autoim	TIDM	auto	9.7	normal	low/normal	Unclear	Other	Low	Low	222.95	22.05	218.64	21.36												NS in multivariate analysis	Low	OR	-0.01	0.32			-0.01
Tenconi	2007	Tenconi, M. T.	case control	retrospective	Solid food introduction	TBF	Not breast fed	Breast fed	0	0	2	>0	>0	DM	Medical diagnosis	TIDM	autoim	TIDM	auto	15.5	normal	low/normal	Unclear	Other	Low	Low					OR	0.769231	0.478469	1.23457	0.273		OR	0.546448	0.323625	0.925926	0.023		Low	OR	-0.26	0.24	-0.6	0.27	-0.6
Virtanen	1992	Childhood Diabetes in Finland	case control	retrospective		TBF	0-2	2+	2	1to2	2	>=2	>=2	DM	Medical diagnosis	TIDM	autoim	TIDM	auto	7TO14	normal	low/normal	Low	Low	Low	Low											OR	0.64	0.42	0.98			Low	OR			-0.45	0.22	-0.45
Virtanen	1992	Childhood Diabetes in Finland	case control	retrospective		TBF	0-3	3+	3	3to4	2	>=3	>=3	DM	Medical diagnosis	TIDM	autoim	TIDM	auto	7TO14	normal	low/normal	Low	Low	Low	Low											OR	0.67	0.48	0.95			Low	OR			-0.4	0.18	-0.4
Visalli	2003	EURODIAB Italy	case control	retrospective	Exclusive BF duration	TBF	0-3	3+	3	3to4	2	>=3	>=3	DM	T1DM diagnosis using WHO criteria	TIDM	autoim	TIDM	auto	7TO14	normal	low/normal	Unclear	Other	Low	Low											OR	0.471698	0.306748	0.724638			Low	OR			-0.75	0.22	-0.75
Borras	2011	Borras, V.	case control	retrospective	BF present/absent	TBF	Not breast fed	Breast fed	0	0	2	>0	>0	DM	T1DM diagnosis using WHO criteria	TIDM	autoim	TIDM	auto	<10	normal	low/normal	High	Other	Low	Low	245	61	980	244	OR	1	0.73	1.36									Low	OR	0	0.16			0
Esfarjani	2001	Esfarjani, F.	case control	retrospective	BF present/absent	TBF	Not breast fed	Breast fed	0	0	2	>0	>0	DM	Medical diagnosis	TIDM	autoim	TIDM	auto	<14	normal	low/normal	High	Other	Low	Low	43	9	40	12	OR	1.43333											Low	OR	0.36	0.49			0.36
Soltesz	1994	Hungarian Childhood Diabetes Epidemiology Study Group (part of EUROBIAB/DIAMOND)	case control	retrospective		TBF	Not breast fed	Breast fed	0	0	2	>0	>0	DM	Medical diagnosis	TIDM	autoim	TIDM	auto	<14	normal	low/normal	High	Other	Low	Low		21		16	OR	0.568182	0.293255	1.0989	0.09							wrong confounding risk of bias- high risk is correct	Low	OR	-0.57	0.34			-0.57
Bodington	1994	Bodington, M. J.	case control	retrospective		TBF	Not breast fed	Breast fed	0	0	2	>0	>0	DM	Medical diagnosis	TIDM	autoim	TIDM	auto	<15	normal	low/normal	High	Other	Low	Low	95	85	96	86	OR	1.02041	0.680272	1.53846									Low	OR	0.02	0.21			0.02
Malcova	2006	Malcova, H.	case control	retrospective	Total BF duration	TBF	0	1.0-3.0	0	0	2	>0	>0	DM	Medical diagnosis	TIDM	autoim	TIDM	auto	<15	normal	low/normal	High	Other	Low	Low	268	79	471	113	OR	0.813008	0.588235	1.1236			OR	0.518135	0.357143	0.75188			Low	OR	-0.21	0.17	-0.66	0.19	-0.66
Perez-Bravo	1996	Perez-Bravo	case control	retrospective	Total BF duration	TBF	0	0+	0	0	2	>0	>0	DM	Medical diagnosis	TIDM	autoim	TIDM	auto	<15	normal	low/normal	High	Other	Low	Low	70	10	81	4													Low	OR	-1.06	0.61			-1.06
Samuelsson	1993	Samuelsson, U.	case control	retrospective	Total BF duration	TBF	Not breast fed	Breast fed	0	0	2	>0	>0	DM	Medical diagnosis	TIDM	autoim	TIDM	auto	<15	normal	low/normal	High	Other	Low	Low	260	30	674	81	OR	1.04154										wrong confounding risk of bias- it should be high	Low	OR	0.04	0.23			0.04
Malcova	2006	Malcova, H.	case control	retrospective	Total BF duration	TBF	1.0-3.0	12+	3	3to4	2	long	>=12	DM	Medical diagnosis	TIDM	autoim	TIDM	auto	<15	normal	low/normal	High	Other	Low	Low	30	708	88	1268	OR	0.6	0.39	0.93			OR	0.42	0.22	0.81			Low	OR	-0.51	0.22	-0.87	0.34	-0.87
Patterson	1994	Patterson, C. C.	case control	retrospective	BF at 2 wk	TBF	0-0.5	0.5	0	0	2	>0	>0	DM	Medical diagnosis	TIDM	autoim	TIDM	auto	<15	normal	low/normal	Unclear	Other	Low	Low	64	186	327	895	OR	0.93	0.67	1.28			OR	0.76	0.54	1.07			Low	OR	-0.07	0.16	-0.27	0.17	-0.27
Robertson	2010	Robertson, L.	case control	retrospective	BF at discharge	TBF	Not BF at discharge	BF at discharge	0	0	2	>0	>0	DM	Medical diagnosis	TIDM	autoim	TIDM	auto	<15	normal	low/normal	Unclear	Other	Low	Low	32	23	90	80	OR	1.27	0.67	2.42			OR	1.62	0.77	3.44			Low	OR	0.24	0.33	0.48	0.38	0.48
Dahlquist	2002	EURODIAB Substudy 2 Study Grp Austria, Latvia, Lithuania, Luxembourg and UK	case control	retrospective	BF present/absent	TBF	Not breast fed	Breast fed	0	0	2	>0	>0	DM	Medical diagnosis	TIDM	autoim	TIDM	auto	<15	normal	low/normal	Unclear	Other	Low	Low											OR	0.75	0.58	0.96			Low	OR			-0.29	0.13	-0.29
Marshall	2004	Marshall, A. L.	case control	retrospective	Total BF duration	TBF	Not breast fed	Breast fed	0	0	2	>0	>0	DM	Medical diagnosis	TIDM	autoim	TIDM	auto	<16	normal	low/normal	High	Other	Low	Low	0.59		0.64		OR	0.702	0.485	1.02								only CM was remained in multivariated analyses : Those variables that were significant at the 5% level or were borderline significant were considered as candidates for inclusion in the multivariate model. Variables were added using forward selection and included if there addi- tion was significant at the 5% level. -	Low	OR	-0.35	0.19			-0.35
McKinney	1999	McKinney, P. A.	case control	retrospective	BF present/absent	TBF	Not breast fed	Breast fed	0	0	2	>0	>0	DM	Medical diagnosis	TIDM	autoim	TIDM	auto	<16	normal	low/normal	Unclear	Other	Low	Low	73	123	151	174	OR	0.65	0.45	0.94			OR	0.6	0.41	0.89			Low	OR	-0.43	0.19	-0.51	0.2	-0.51
Sipetic	2005	Sipetic, S.	case control	retrospective	Exclusive BF duration	TBF	0-4	4+	4	3to4	2	>=4	>=4	DM	Medical diagnosis	TIDM	autoim	TIDM	auto	<16	normal	low/normal	Unclear	Other	Low	Low	0.371		0.552		OR	0.478469	0.769231	0.297619								NS in multivariate analysis	Low	OR	-0.74	0.48			-0.74
Meloni	1997	Meloni, T.	case control	retrospective	BF present/absent	TBF	Not breast fed	Breast fed	0	0	2	>0	>0	DM	Medical diagnosis	TIDM	autoim	TIDM	auto	<17	normal	low/normal	Unclear	Other	Low	Low	84	16	70	30							OR	2.43902	1.0989	5.26316			Low	OR	0.81	0.35	0.89	0.39	0.89
Siemiatycki	1989	Siemiatycki, J.	case control	retrospective	Exclusive BF duration	TBF	Not breast fed	Breast fed	0	0	2	>0	>0	DM	Medical diagnosis	TIDM	autoim	TIDM	auto	<17	normal	low/normal	Unclear	Other	Low	Low	215		116		OR	0.769231	0.47619	1.25			OR	0.833333	0.4	1.66667			Low	OR	-0.26	0.25	-0.18	0.35	-0.18
Mayer	1988	COLORADO DIABETES REGISTRY	case control	retrospective	Total BF duration	TBF	Not breast fed	Breast fed	0	0	2	>0	>0	DM	Medical diagnosis	TIDM	autoim	TIDM	auto	<18	normal	low/normal	High	Other	Low	Low	134	134	299	180	OR	0.6	0.45	0.82			OR	0.7	0.5	0.97	0.03		Low	OR	-0.51	0.16	-0.36	0.17	-0.36
Gimeno	1997	Gimeno, S. D.	case control	retrospective	Total BF duration	TBF	Not breast fed	Breast fed	0	0	2	>0	>0	DM	Medical diagnosis	TIDM	autoim	TIDM	auto	<18	normal	low/normal	Unclear	Other	Low	Low											OR	0.436681	0.233645	0.819672			Low	OR			-0.83	0.32	-0.83
Rosenbauer	2008	Rosenbauer, J.	case control	retrospective	Total BF duration	TBF	0-0.5	5+	0	0	2	medium	>=5	DM	Medical diagnosis	TIDM	autoim	TIDM	auto	<5	normal	low/normal	High	Other	Low	Low	253	214	792	380	OR	0.57	0.45	0.72	<0.001		OR	0.71	0.54	0.93	0.012		Low	OR	-0.56	0.12	-0.34	0.14	-0.34
Majeed	2011	Majeed	case control	retrospective	Total BF duration	TBF	0-6	6+	6	5to7	2	>=6	>=6	TIDM	Medical diagnosis	TIDM	autoim	TIDM	auto	18 mths - 17yrs	normal	low/normal	Unclear	Other	Low	Low	55	10	243	2	OR	0.0452675									NS		Low	OR	-3.1	0.79			-3.1
Ahabi	2011	Ahadi, M.		retrospective	Total BF duration	TBF	0-6	6+	6	5to7	2	>=6	>=6	DM	T1DM diagnosis using WHO criteria	TIDM	autoim	TIDM	auto	6.7	normal	low/normal	Unclear	Other	Low	Low	78	23	90	11	OR	0.414493			0.03							Univariable and multivariable conditional logistic regression methods were also performed. Variables which were related to diabetes at significance level of p value < 0.1 in univariable analysis were entered into the multivariable analysis. The level p < 0.05 was con- sidered as the cut-off value for significance.	Low	OR	-0.88	0.4			-0.88
Mason	1995	Mason	CASE CONTROL	retrospective	Ever breastfed	TBF	never	ever	0	0	2	>0	>0	JRA	polyarticular onset		autoim	JRA-polyarticular	auto	6	normal	low/normal	High	Other	Low	Low	10	14	18	15	OR	0.6	0.21	1.7	<0.001		OR						Low	OR	-0.51	0.53			-0.51
Mason	1995	Mason	CASE CONTROL	retrospective	Ever breastfed	TBF	never	ever	0	0	2	>0	>0	JRA	pauciarticular onset		autoim	JRA-pauciarticular	auto	6	normal	low/normal	High	Other	Low	Low	10	18	27	15	OR	0.31	0.2	0.93	<0.001		OR						Low	OR	-1.17	0.56			-1.17
Mason	1995	Mason	CASE CONTROL	retrospective	Ever breastfed	TBF	never	ever	0	0	2	>0	>0	JRA			autoim	JRA	auto	6	normal	low/normal	High	Other	Low	Low	20	34	47	32	OR	0.4	0.2	0.81	<0.001		OR						Low	OR	-0.92	0.36			-0.92
Ellis	2012	CLARITY	case control	retrospective	Total BF duration	TBF	0	0+	0	0	2	>0	>0	Juvenile idiopathic arthritis	Juvenile idiopathic arthritis		autoim	JRA	auto	<18	normal	low/normal	High	Other	Low	Low	197	31	369	85	OR						OR	0.86	0.39	1.89			Low	OR	0.38	0.23	-0.15	0.4	-0.15
Sonntag	2007	Sonntag, B.	CASE CONTROL	retrospective	Ever breastfed	TBF	never	ever	0	0	2	>0	>0	IBD	Ulcerative colitis		autoim	IBD-UC	auto	40	normal	low/normal	High	Other	Low	Low					OR	1.015	0.812	1.267		without significant differences in the duration of breastfeeding be- tween groups.	OR						Low	OR	0.01	0.11			0.01
Corrao	1997	GISC	CASE CONTROL	retrospective	Ever breastfed	TBF	ever	never	0	0	1	>0	>0	IBD	Ulcerative colitis		autoim	IBD-UC	auto	18-65	normal	low/normal	Unclear	Other	Low	Low	111	483	81	513	OR						OR	1.5	1.1	2.1			Low	OR	0.38	0.16	0.41	0.17	0.41
Koletzko	1991	Koletzko, S.	CASE CONTROL	retrospective	Ever breastfed	TBF	never	ever	0	0	2	>0	>0	IBD	Ulcerative colitis		autoim	IBD-UC	auto	15	normal	low/normal	Low	Low	Low	Low					OR						OR	1.7	0.77	3.65	0.19	Duration of exclusive breast feeding, total length of breast feeding, and age at introduction of solid foods did not differ between children with ulcerative colitis and their siblings.	Low	OR			0.53	0.39	0.53
Hansen	2011	Hansen	CASE CONTROL	retrospective	Ever breastfed	TBF	never	ever	0	0	2	>0	>0	IBD	Ulcerative colitis		autoim	IBD-UC	auto	38	normal	low/normal	High	Other	Low	Low					OR	0.7	0.27	1.84	<0.05		OR	0.7	0.27	1.84		Adjusted estimates are mentioned in the text only if differing from unadjusted estimates.	Low	OR	-0.36	0.49	-0.36	0.49	-0.36
Hansen	2011	Hansen	CASE CONTROL	retrospective	Total duration of breastfeeding	TBF	?6	>6	6	5to7	2	>=6	>=6	IBD	Ulcerative colitis		autoim	IBD-UC	auto	38	normal	low/normal	High	Other	Low	Low					OR	0.4	0.13	1.28	<0.05		OR	0.4	0.13	1.28		Adjusted estimates are mentioned in the text only if differing from unadjusted estimates.	Low	OR	-0.92	0.59	-0.92	0.59	-0.92
Wang	2013	Wang, Y. F., CHINA	CASE CONTROL	retrospective	Ever breastfed	TBF	never	ever	0	0	2	>0	>0	IBD	Ulcerative colitis		autoim	IBD-UC	auto	<70	normal	low/normal	Unclear	Other	Low	Low	608.22	699.78	699.78	608.22	OR	1.08	0.79	1.477	0.628		OR						Low	OR	0.08	0.16			0.08
Gearry	2010	Canterbury Inflammatory Bowel Disease Project.	CASE CONTROL	retrospective	Ever breastfed	TBF	never	ever	0	0	2	>0	>0	IBD	Ulcerative colitis		autoim	IBD-UC	auto	>20	normal	low/normal	High	Other	Low	Low					OR						OR	0.71	0.52	0.96			Low	OR			-0.34	0.15	-0.34
Castiglione	2011	Castiglione	CASE CONTROL	retrospective	Ever breastfed	TBF	never	ever	0	0	2	>0	>0	IBD	Ulcerarive colitis		autoim	IBD-UC	auto	16-66	normal	low/normal	High	Other	Low	Low	416	111	419	143	OR	1.27	0.96	1.69	<0.05		OR						Low	OR	0.24	0.15			0.24
Sonntag	2007	Sonntag, B.	CASE CONTROL	retrospective	Ever breastfed	TBF	never	ever	0	0	2	>0	>0	IBD	Crohn’s disease		autoim	IBD-CRD	auto	40	normal	low/normal	High	Other	Low	Low					OR	0.831	0.68	1.015		without significant differences in the duration of breastfeeding be- tween groups.	OR						Low	OR	-0.19	0.1			-0.19
Corrao	1997	GISC	CASE CONTROL	retrospective	Ever breastfed	TBF	ever	never	0	0	1	>0	>0	IBD	Crohn’s disease		autoim	IBD-CRD	auto	18-65	normal	low/normal	Unclear	Other	Low	Low	42	183	30	195	OR						OR	1.9	1.1	3.3			Low	OR	0.4	0.26	0.64	0.28	0.64
Bergstrand	1983	Hellers	case control	retrospective	Total BF duration	TBF	0	1-2 months	0	0	2	short	0TO2	IBD	Crohn's disease		autoim	IBD-CRD	auto	20	normal	low/normal	High	Other	Low	Low	57	36	39	11					<0.01								Low	OR	-0.81	0.4			-0.81
Bergstrand	1983	Hellers	case control	retrospective	Total BF duration	TBF	0-2 months	3-4 months	2	1to2	2	short	3TO4	IBD	Crohn's disease		autoim	IBD-CRD	auto	20	normal	low/normal	High	Other	Low	Low	66	93	53	50					<0.01								Low	OR	-0.4	0.25			-0.4
Bergstrand	1983	Hellers	case control	retrospective	Total BF duration	TBF	0-4 months	5-6 months	4	3to4	2	medium	5TO6	IBD	Crohn's disease		autoim	IBD-CRD	auto	20	normal	low/normal	High	Other	Low	Low	75	159	84	103					<0.01								Low	OR	-0.55	0.2			-0.55
Bergstrand	1983	Hellers	case control	retrospective	Total BF duration	TBF	0-6 months	7+	6	5to7	2	>=6	>=6	IBD	Crohn's disease		autoim	IBD-CRD	auto	20	normal	low/normal	High	Other	Low	Low	74	234	121	187					<0.01								Low	OR	-0.72	0.18			-0.72
Hansen	2011	Hansen	CASE CONTROL	retrospective	Ever breastfed	TBF	never	ever	0	0	2	>0	>0	IBD	Crohn’s disease		autoim	IBD-CRD	auto	38	normal	low/normal	High	Other	Low	Low					OR	1.8	0.6	5.38	<0.05		OR	1.8	0.6	5.38		Adjusted estimates are mentioned in the text only if differing from unadjusted estimates.	Low	OR	0.59	0.56	0.59	0.56	0.59
Hansen	2011	Hansen	CASE CONTROL	retrospective	Total duration of breastfeeding	TBF	?6	>6	6	5to7	2	>=6	>=6	IBD	Crohn’s disease		autoim	IBD-CRD	auto	38	normal	low/normal	High	Other	Low	Low					OR	0.63	0.2	1.91	<0.05		OR	0.63	0.2	1.91		Adjusted estimates are mentioned in the text only if differing from unadjusted estimates.	Low	OR	-0.46	0.57	-0.46	0.57	-0.46
Baron	2005	Baron, S.	CASE CONTROL	retrospective	Ever breastfed	TBF	never	ever	0	0	2	>0	>0	IBD	Crohn’s disease		autoim	IBD-CRD	auto	<17	normal	low/normal	Unclear	Other	Low	Low					OR	1.6	1.1	2.4	0.01	CD children were breast fed exclusively and non-exclusively on average two weeks more than controls but the difference was not significant (10 weeks v eight weeks, and eight weeks v six weeks, respectively) (p=0.08)	OR	2.1	1.3	3.4	0.003		Low	OR	0.47	0.21	0.74	0.25	0.74
Gruber	1996	Gruber, M.	CASE CONTROL	retrospective	Ever breastfed	TBF	never	ever	0	0	2	>0	>0	IBD	Crohn’s disease		autoim	IBD-CRD	auto	<22	normal	low/normal	Unclear	Other	Low	Low	14	40	33	57	OR	0.604	0.29	1.3	0.183		OR				ns		Low	OR	-0.5	0.39			-0.5
Gearry	2010	Canterbury Inflammatory Bowel Disease Project.	CASE CONTROL	retrospective	Ever breastfed	TBF	never	ever	0	0	2	>0	>0	IBD	Crohn’s disease		autoim	IBD-CRD	auto	>20	normal	low/normal	High	Other	Low	Low					OR						OR	0.55	0.41	0.74			Low	OR			-0.6	0.15	-0.6
Castiglione	2011	Castiglione	CASE CONTROL	retrospective	Ever breastfed	TBF	never	ever	0	0	2	>0	>0	IBD	Crohn's disease		autoim	IBD-CRD	auto	16-66	normal	low/normal	High	Other	Low	Low	353	115	419	143	OR	1.04	0.78	1.39	<0.05		OR						Low	OR	0.04	0.15			0.04
Hansen	2011	Hansen	CASE CONTROL	retrospective	Ever breastfed	TBF	never	ever	0	0	2	>0	>0	IBD	IBD		autoim	IBD	auto	38	normal	low/normal	High	Other	Low	Low					OR	1.07	0.52	2.16	<0.05		OR	1.07	0.52	2.16		Adjusted estimates are mentioned in the text only if differing from unadjusted estimates.	Low	OR	0.07	0.36	0.07	0.36	0.07
Hansen	2011	Hansen	CASE CONTROL	retrospective	Total duration of breastfeeding	TBF	?6	>6	6	5to7	2	>=6	>=6	IBD	IBD		autoim	IBD	auto	38	normal	low/normal	High	Other	Low	Low					OR	0.5	0.23	1.11	<0.05		OR	0.5	0.23	1.11		Adjusted estimates are mentioned in the text only if differing from unadjusted estimates.	Low	OR	-0.69	0.41	-0.69	0.41	-0.69
DesRoches	2010	DesRoches, A.	CASE CONTROL	retrospective	Ever breastfed	TBF	ever	never	0	0	1	>0	>0	FOOD ALLERGY	Peanut allergy	FA-PEANUT	atopic	FA-PEANUT	0to4	<1.5	normal	low/normal	Unclear	Other	Low	Low	40	162	40	161												In this study, breastfeeding did not appear to be in itself a risk factor for the development of peanut allergy as a high rate of breastfeeding (80%) and similar breastfeeding durations were observed in both groups.	Low	OR	-0.01	0.25			-0.01
Paton	2012	ACT Kindergarten Health Check	CROSS SECTIONAL	retrospective	Total BF duration	TBF	0	0+	0	0	2	>0	>0	FOOD ALLERGY	parent reported nut allergy	FA-NUTS-PEANUTS	atopic	FA-PEANUT	5to14	7	normal	low/normal	High	Other	Low	Low	549	2	12599	101							OR	1.53	1.11	2.11	0.01	Adjusted for age and sex where appropriate	Low	OR	0.79	0.72	0.43	0.16	0.43
Lack	2003	ALSPAC	prospective cohort	prospective	EVER BF	TBF	NEVER	EVER	0	0	2	>0	>0	Food Allergy	peanut allergy based on questionnaire	FA-PEANUT	atopic	FA-PEANUT	5to14	6	normal	low/normal	High	Other	Low	Low					OR	3.11	0.73	13.32							NOT TESTED	All the significant factors listed in Table 1 were entered into a regression analysis. Early soy consumption, rash over the joints and skin creases (eczema), and oozing, crusted rash remained independent risk factors for peanut allergy and for a positive peanut-challenge test after adjustment for other factors (Table 2).	Low	OR	1.13	0.74			1.13
Ventura	1988	Italian Working Group on CMPA	CASE CONTROL	retrospective	Ever breastfed	TBF	ever	never	0	0	1	>0	>0	FOOD ALLERGY	Cow's milk		atopic	FA-CM	0to4	<1	normal	low/normal	High	Other	Low	Low	89	59	104	87	OR					Bf was not more common or of longer duration in controls compared to cases	OR						Low	OR	0.23	0.22			0.23
Hikino	2001	Hikino, Fukoka City	prospective cohort	prospective	Ever breastfed	TBF	ever	never	0	0	1	>0	>0	Food Allergy	FA-any.12mo		atopic	FA-ANY	0to4	1.5	normal	low/normal	Unclear	Other	Low	Low											OR	0.58	0.52	0.66			Low	OR	-0.37	0.06	-0.54	0.07	-0.54
Milner	2004	National Maternal and Infant Health Survey and Longitudinal Follow Up	prospective cohort	prospective	Ever breastfed	TBF	never	ever	0	0	2	>0	>0	Food Allergy	ANY		atopic	FA-ANY	0to4	3	normal	low/normal	Unclear	Other	Low	Low					OR	1.39	1.13	1.71									Low	OR	0.33	0.11			0.33
Kull	2002	BAMSE	prospective cohort	prospective	Total duration of breastfeeding	TBF	< 6	>= 6	6	5to7	2	>=6	>=6	Food Allergy	Ever FA-any		atopic	FA-ANY	0to4	2	normal	low/normal	Unclear	Other	Low	Low											OR	1	0.85	1.31			Low	OR	0.03	0.11	0	0.14	0
Welander	2010	ABIS COHORT	prospective cohort	prospective	duration of total BF	TBF	2017-12-11	0-2	2	1to2	1	long	11TO12	CD	tTG/biopsy	CD-Ab	autoim	CD	auto	8.4	normal	low/normal	High	Other	Low	Low					HR	0.7	0.2	3.1		Ages at the introduction of gluten and the end of breastfeeding were not associated with future CD (Table 2). Almost one half of partici- pating children were breastfed for >10 months (Table 2).							Low	HR	-0.36	0.76			-0.36
Auricchio	1983	Auricchio, S.	CASE CONTROL	retrospective	Total duration of breastfeeding	TBF	>1	<1	1	1to2	1	>=1	>=1	CD	pathology-CD	CD	autoim	CD	auto	<18	normal	low/normal	High	Other	Low	Low	134	56	134	113	OR						OR						Low	OR	0.7	0.2			0.7
Ziegler	2003	German BABYDIAB	prospective cohort	prospective	Total BF duration	TBF	0	3.1-6	0	0	2	medium	3TO6	CD	IgA-Ttgca	CD-Ab	autoim	CD	auto	5	high	high	Low	Low	Low	Low					Hazard ratio	1.11111	0.333333	3.33333			Hazard ratio	1.25	0.37037	5			Low	HR	0.11	0.56	0.22	0.71	0.22
Ziegler	2003	German BABYDIAB	prospective cohort	prospective	Total BF duration	TBF	0.1-3	3.1-6	3	3to4	2	medium	3TO6	CD	IgA-Ttgca	CD-Ab	autoim	CD	auto	5	high	high	Low	Low	Low	Low					Hazard ratio	0.833333	0.27027	2.5			Hazard ratio	0.833333	0.277778	2.5			Low	HR	-0.18	0.56	-0.18	0.56	-0.18
Peters	2001	Peters, U.	CASE CONTROL	retrospective	total Duration of Breast feeding	TBF	0	?7	0	0	2	long	>=7	CD		CD	autoim	CD	auto	< 10	normal	low/normal	High	Other	Low	Low											OR	0.18	0.06	0.52			Low	OR			-1.71	0.54	-1.71
Peters	2001	Peters, U.	CASE CONTROL	retrospective	total Duration of Breast feeding	TBF	?2	>2	2	1to2	2	>=2	>=2	CD		CD	autoim	CD	auto	< 10	normal	low/normal	High	Other	Low	Low											OR	0.37	0.21	0.64			Low	OR			-0.99	0.28	-0.99
Rona	2005	Rona, Chile	retrspective cohort	retrospective	Total duration of breastfeeding	TBF	> 1	<=1	1	1to2	1	>=1	>=1	BHR	BHR	LF-PC20(FEV1)	atopic	BHR	ge15	27	normal	low/normal	Unclear	Other	Low	Low											OR	0.8	0.46	1.39	0.428		Low	OR			-0.22	0.28	-0.22
Nagel (Affluent countries)	2008	ISAAC Phase 2 - Affluent countries	CROSS SECTIONAL	retrospective	Ever breastfed	TBF	never	ever	0	0	2	>0	>0	BHR	BHR	LF-PC15(FEV1)	atopic	BHR	5to14	12	normal	low/normal	High	Other	Low	Low					OR						OR	0.92	0.75	1.12			Low	OR			-0.08	0.1	-0.08
Nagel (Non Affluent countries)	2008	ISAAC Phase 2- Nonaffluent countries	CROSS SECTIONAL	retrospective	Ever breastfed	TBF	never	ever	0	0	2	>0	>0	BHR	BHR	LF-PC15(FEV1)	atopic	BHR	5to14	12	normal	low/normal	High	Other	Low	Low					OR						OR	0.66	0.37	1.2			Low	OR			-0.42	0.31	-0.42
Scholtens	2009	PIAMA	prospective cohort	prospective	Total duration of breastfeeding	TBF	0	>3.5	0	0	2	medium	>=4	BHR	BHR	LF-PC20(FEV1)	atopic	BHR	5to14	8	normal	low/normal	Low	Low	Low	Low											OR	0.94	0.61	1.44			Low	OR	-0.02	0.2	-0.06	0.22	-0.06
Elliott	2008	ALSPAC	prospective cohort	prospective	Ever breastfed	TBF	never	ever	0	0	2	>0	>0	BHR	BHR	LF-PC20(FEV1)	atopic	BHR	5to14	8	normal	low/normal	Unclear	Other	Low	Low					OR	1.11	0.88	1.39			OR	1.14	0.9	1.44			Low	OR	0.1	0.11	0.13	0.12	0.13
Virtanen	2010	DIPP (Type 1 Diabetes Prediction and Prevention Project)	prospective cohort	prospective	total duration of BF	TBF	higher tertile	lowest tertile	5	5to7	1	long	>=10	Rhinoconjunctivits			atopic	AR	5to14	5	normal	low/normal	High	Other	Low	Low					HR	1.1	0.64	1.88			HR					NOT TESTED -the least significant one/ones were removed from the multiple regression model and the possible confound- ing variables were included in the model, and this was repeated until all dietary variables remaining in the model were statistically significant at the 5% level.	Low	HR	0.1	0.27			0.1
Larsson	2008	Dampness in Buildings and Health (DBH)	prospective cohort	prospective	Total duration of breastfeeding	TBF	>6	0	0	0	1	long	6	Rhinoconjunctivits	doctor diagnosed rhinitis in 2005 and no doctor diagnosed rhinitis at baseline		atopic	AR	5to14	9	normal	low/normal	Low	Low	Low	Low					OR	1.11	0.53	2.3		5-YRS INCEDENCE	OR				ns		Low	OR	0.1	0.37			0.1
Larsson	2008	Dampness in Buildings and Health (DBH)	prospective cohort	prospective	Total duration of breastfeeding	TBF	>6	<3	3	3to4	1	long	>=6	Rhinoconjunctivits	doctor diagnosed rhinitis in 2005 and no doctor diagnosed rhinitis at baseline		atopic	AR	5to14	9	normal	low/normal	Low	Low	Low	Low					OR	0.96	0.63	1.46		5-YRS INCEDENCE	OR				ns		Low	OR	-0.04	0.21			-0.04
Farooqi	1998	Farooqi, Oxfordshire	prospective cohort	prospective	Ever breastfed	TBF	ever	never	0	0	1	>0	>0	Rhinoconjunctivits	Ever AR		atopic	AR	ge15	16	normal	low/normal	High	Other	Low	Low					OR	1.08	0.85	1.39							ns		Low	OR	0.08	0.13			0.08
Burr	1993	Burr	prospective cohort (of RCT)	prospective	Ever BF	TBF	never	ever	0	0	2	>0	>0	Rhinoconjunctivits			atopic	AR	5to14	7	high	high	High	Other	Low	Low									ns	no significant difference							Low	OR	-0.05	0.22			-0.05
Bergmann	2000	Multicenter Allergy Study (MAS)	prospective cohort	prospective	Total duration of breastfeeding	TBF	<=6	>6	6	5to7	2	>=6	>=6	Rhinoconjunctivits	Ever AR		atopic	AR	5to14	6	normal	low/normal	High	Other	Low	Low											OR	1.136	0.759	1.7			Low	OR			0.13	0.21	0.13
Hide	1981	The Isle of Wight Prevention study	prospective cohort	prospective	Ever breastfed	TBF	never	ever	0	0	2	>0	>0	Rhinoconjunctivits	Ever AR		atopic	AR	0to4	1	normal	low/normal	High	Other	Low	Low																	Low	OR	-0.2	0.17			-0.2
Hide	1981	The Isle of Wight Prevention study	prospective cohort	prospective	Total duration of breastfeeding	TBF	<6	6	6	5to7	2	>=6	>=6	Rhinoconjunctivits	Ever AR		atopic	AR	0to4	1	normal	low/normal	High	Other	Low	Low																	Low	OR	-0.2	0.17			-0.2
Kull	2002	BAMSE	prospective cohort	prospective	Total duration of breastfeeding	TBF	< 6	>= 6	6	5to7	2	>=6	>=6	Rhinoconjunctivits	Ever AR		atopic	AR	0to4	2	normal	low/normal	Unclear	Other	Low	Low											OR	0.8	0.58	1.09			Low	OR	-0.36	0.15	-0.22	0.16	-0.22
Strachan	1996	Sheffield Child Development Study	prospective cohort	prospective	Ever breastfed	TBF	never	ever	0	0	2	>0	>0	Rhinoconjunctivits	hay fever		atopic	AR	ge15	16	normal	low/normal	High	Other	Low	Low											OR						Low	OR	0.12	0.05			0.12
Miyake	2003	Miyake, Osaka City	CROSS SECTIONAL	retrospective	Total duration of breastfeeding	TBF	0	>=3	0	0	2	medium	>=3	Rhinoconjunctivits			atopic	AR	ge15	15	normal	low/normal	High	Other	Low	Low	686	87	2116	338	OR	1.26	0.98	1.63			OR	1.13	0.87	1.47			Low	OR	0.23	0.13	0.12	0.13	0.12
Kurt	2009	Prevalence and Risk Factors of Allergies in Turkey (PARFAIT)	CROSS SECTIONAL	retrospective	Ever breastfed	TBF	never	ever	0	0	2	>0	>0	Rhinoconjunctivits	Hay fever		atopic	AR	ge15	15	normal	low/normal	Low	Low	Low	Low					OR						OR	1.005	0.95	1.07	<0.05		Low	OR			0	0.03	0
Butland (BCS58/70)	1997	British Cohort Study (BCS58 and BCS70)	prospective cohort	prospective	Total duration of breastfeeding	TBF	0	>1	0	0	2	>0	>0	Rhinoconjunctivits	AR.12mo		atopic	AR	ge15	16	normal	low/normal	Unclear	Other	Low	Low											OR	1.2	1.08	1.33		this adjusted OR is for both cohorts	Low	OR	0.45	0.08	0.18	0.05	0.18
Larsson	2008	Dampness in Buildings and Health (DBH)	prospective cohort	prospective	Total duration of breastfeeding	TBF	>6	0	0	0	1	medium	6	AD	eczema ever and no eczema ever at baseline		atopic	AD	5to14	9	normal	low/normal	Low	Low	Low	Low					OR	0.64	0.33	1.24		5-YRS INCEDENCE	OR				ns		Low	OR	-0.45	0.34			-0.45
Larsson	2008	Dampness in Buildings and Health (DBH)	prospective cohort	prospective	Total duration of breastfeeding	TBF	>6	<3	3	3to4	1	long	>=6	AD	eczema ever and no eczema ever at baseline		atopic	AD	5to14	9	normal	low/normal	Low	Low	Low	Low					OR	0.88	0.64	1.23		5-YRS INCEDENCE	OR				ns		Low	OR	-0.13	0.17			-0.13
Ruiz	1992	Ruiz	prospective cohort	prospective	duration of total breastfeeding	TBF	>3	<=3	3	3to4	1	>=3	>=3	AD			atopic	AD	0to4	1	high	high	High	Other	Low	Low									NS								Low	OR	0.11	0.72			0.11
Ghaderi	2014	Ghaderi, R.	CASE CONTROL	retrospective	Total duration of breastfeeding	TBF	>=12	<12	12	8to12	1	>=12	>=12	AD			atopic	AD	0to4	5	normal	low/normal	High	Other	Low	Low	42	51	18	79	OR						OR						Low	OR	1.28	0.33			1.28
Farooqi	1998	Farooqi, Oxfordshire	prospective cohort	prospective	Ever breastfed	TBF	ever	never	0	0	1	>0	>0	AD	Ever AD		atopic	AD	ge15	16	normal	low/normal	High	Other	Low	Low					OR	1.02	0.77	1.35							ns		Low	OR	0.02	0.14			0.02
Kramer	1981	Kramer, M. S.	CASE CONTROL	retrospective	Ever breastfed	TBF	never	ever	0	0	2	>0	>0	AD			atopic	AD	5to14	<20	normal	low/normal	High	Other	Low	Low	59	83	102	226	OR					MATCH ANALYSES SHOWS NOT SIGNIFICANT ASSOCIATION (NUMBERS OR ODDS RATION NOT AVAILABLE)	OR						Low	OR	0.45	0.21			0.45
Mihrshahi	2007	Childhood ASTHMA Prevention Study (CAPS)	prospective cohort	prospective	Ever breastfed	TBF	never	ever	0	0	2	>0	>0	AD	Ever AD		atopic	AD	5to14	5	high	high	Low	Low	Low	Low					OR	1.81	0.83	3.97			OR	1.38	0.61	3.12			Low	OR	0.59	0.4	0.32	0.42	0.32
Mihrshahi	2007	Childhood ASTHMA Prevention Study (CAPS)	prospective cohort	prospective	Total duration of breastfeeding	TBF	< 6	>= 6	6	5to7	2	>=6	>=6	AD	Ever AD		atopic	AD	5to14	5	high	high	Low	Low	Low	Low					OR	1.56	1.05	2.33			OR	1.42	0.94	2.16			Low	OR	0.44	0.2	0.35	0.21	0.35
Taylor (BCS46)	1984	British Cohort Study (BCS46)	prospective cohort	prospective	Total duration of breastfeeding	TBF	0	>1	0	0	2	>0	>0	AD	Ever AD		atopic	AD	5to14	6	normal	low/normal	Low	Low	Low	Low															ns		Low	OR	-0.13	0.16			-0.13
Zutavern	2004	ZUTAVERN, A	prospective cohort	prospective	breastfed	TBF	NEVER	EVER	0	0	2	>0	>0	AD			atopic	AD	5to14	5.5	normal	low/normal	Low	Low	Low	Low									0.12	in the paper they call it prevalence at age 5.5 but based on the definition it is not for AD and transiet wheeze	OR	0.71	0.47	1.1		According to the findings from principal component analysis and the significance levels from the univariate analyses, introduction of egg and vegetables as well as breast feeding were incorporated in the multivariate models	Low	OR	-0.27	0.17	-0.34	0.22	-0.34
Burr	1993	Burr	prospective cohort	prospective	Ever breastfed	TBF	never	ever	0	0	2	>0	>0	AD			atopic	AD	5to14	7	high	high	Unclear	Other	Low	Low										A history of wheeze was significantly less common among children who had ever been breast fed. No significant differences were found in respect of asthma, eczema, or allergic rhinitis.							Low	OR	-0.38	0.21			-0.38
Taylor (BCS58)	1984	British Cohort Study (BCS58)	prospective cohort	prospective	Total duration of breastfeeding	TBF	0	>1	0	0	2	>0	>0	AD	Ever AD		atopic	AD	5to14	7	normal	low/normal	Unclear	Other	Low	Low															<.001		Low	OR	0.44	0.08			0.44
Flohr	2011	ISAAC Phase 2	CROSS SECTIONAL	retrospective	Ever breastfed	TBF	never	ever	0	0	2	>0	>0	AD	Eczema Ever		atopic	AD	5to14	12	normal	low/normal	Unclear	Other	Low	Low					OR						OR	1.1	1	1.22			Low	OR			0.1	0.05	0.1
Purvis	2005	Auckland Birthweight Collaborative study	prospective cohort	prospective	Total duration of breastfeeding	TBF	0	? 6	0	0	2	long	>=6	AD	AD.12mo		atopic	AD	0to4	3.5	normal	low/normal	High	Other	Low	Low					OR	9.95	2.66	37.14			OR	9.93	2.18	45.36			Low	OR	2.3	0.67	2.3	0.78	2.3
Pratt	1984	Pratt	prospective cohort	prospective	Ever breastfed	TBF	never	ever	0	0	2	>0	>0	AD			atopic	AD	0to4	4.5	normal	low/normal	High	Other	Low	Low																	Low	OR	-0.11	0.3			-0.11
Hide	1981	The Isle of Wight study	prospective cohort	prospective	Ever breastfed	TBF	never	ever	0	0	2	>0	>0	AD	Ever AD		atopic	AD	0to4	1	normal	low/normal	High	Other	Low	Low																	Low	OR	-0.13	0.27			-0.13
Wang	2007	Tiawan Nationation Birth Cohort Study	prospective cohort	prospective	Total BF duration	TBF	No BF	BF	0	0	2	>0	>0	AD			atopic	AD	0to4	0.5	normal	low/normal	High	Other	Low	Low																	Low	OR	0.17	0.28			0.17
Tanaka	2009	Fukuoka Child Health Study	CROSS SECTIONAL	retrospective	Total duration of breastfeeding	TBF	<6	?6	6	5to7	2	>=6	>=6	AD			atopic	AD	0to4	3	normal	low/normal	High	Other	Low	Low					OR	0.95	0.71	1.27			OR	0.95	0.71	1.3			Low	OR	-0.05	0.15	-0.05	0.16	-0.05
Miyake	2009	Osaka Maternal and Child Health Study (OMCHS)	prospective cohort	prospective	Total duration of breastfeeding	TBF	< 6	>=6	6	5to7	2	>=6	>=6	AD	Ever AD		atopic	AD	0to4	2	normal	low/normal	High	Other	Low	Low					OR	1.35	0.88	2.14			OR	1.39	0.88	2.26			Low	OR	0.3	0.24	0.33	0.25	0.33
Hide	1981	The Isle of Wight Prevention study	prospective cohort	prospective	Total duration of breastfeeding	TBF	<6	6	6	5to7	2	>=6	>=6	AD	Ever AD		atopic	AD	0to4	1	normal	low/normal	High	Other	Low	Low																	Low	OR	-0.13	0.27			-0.13
Haileamlak	2005	Haileamlak, A.	case control	retrospective	Total BF duration	TBF	?12	>24	12	8to12	2	long	>=12	AD	AD		atopic	AD	0to4	5	normal	low/normal	High	Other	Low	Low											OR	0.76	0.49	1.18			Low	OR			-0.27	0.22	-0.27
Burr	1989	Burr	prospective cohort	prospective	Ever breastfed	TBF	never	ever	0	0	2	>0	>0	AD	Ever AD		atopic	AD	0to4	1	high	high	Low	Low	Low	Low									ns								Low	OR	-0.2	0.19			-0.2
Moore	1985	Moore	prospective cohort (of RCT)	prospective	EVER BF	TBF	NEVER	EVER	0	0	2	>0	>0	AD	eczema at 3 months		atopic	AD	0to4	0.25	high	high	Low	Low	Low	Low																	Low	OR	-0.27	0.4			-0.27
Harris	2001	Harris	prospective cohort	prospective	Ever breastfed	TBF	never	ever	0	0	2	>0	>0	AD	Ever AD		atopic	AD	0to4	2	normal	low/normal	Low	Low	Low	Low											OR	0.97	0.64	1.47	0.89		Low	OR	0.13	0.18	-0.03	0.21	-0.03
Snijders	2008	KOALA	prospective cohort	prospective	total duration of BF	TBF	0	>9	0	0	2	long	>=9	AD	parent questionnaire		atopic	AD	0to4	2	normal	low/normal	Low	Low	Low	Low					OR	1	0.74	1.35			OR	0.66	0.4	1.09			Low	OR	0	0.15	-0.42	0.26	-0.42
Chuang	2011	TaiwanBirth Cohort Study	prospective cohort	prospective	Total duration of breastfeeding	TBF	0	<=12	0	0	2	long	<=12	AD			atopic	AD	0to4	1.5	normal	low/normal	Low	Low	Low	Low					OR	1.65	1.28	2.13			OR	1.44	1.11	1.87	0.006	Considering the effect of maternal education on breastfeeding practice and AD reported, we analyzed odds ratio of AD beyond 6 months by maternal educational level in Table 4. After adjustment for potential confounders, prolonging breastfeeding did not show the protective effect on AD among 18 months children, even significantly increased the risk of AD in children whose mothers had high education…	Low	OR	0.5	0.13	0.36	0.13	0.36
Abd	2012	ALSPAC	prospective cohort	prospective	Ever breastfed	TBF	never	ever	0	0	2	>0	>0	AD	Ever AD		atopic	AD	0to4	3.5	normal	low/normal	Unclear	Other	Low	Low					OR	1.43	1.26	1.61								and there was evidence of increased eczema risk with increasing breastfeeding duration. This association persisted on adjustment for potential confound- ers including parental education and history of atopy, and on exclusion of children with symptoms of rash in the fi rst six months.	Low	OR	0.36	0.06			0.36
Hikino	2001	Hikino, Fukoka City	prospective cohort	prospective	Ever breastfed	TBF	never	ever	0	0	2	>0	>0	AD	AD.12mo		atopic	AD	0to4	1.5	normal	low/normal	Unclear	Other	Low	Low																	Low	OR	0.4	0.12			0.4
Morales	2012	INMA PROJECT	prospective cohort	prospective	Total duration of breastfeeding	TBF	0	>6	0	0	2	long	>=6	AD	Ever AD		atopic	AD	0to4	1	normal	low/normal	Unclear	Other	Low	Low					OR	0.64	0.29	1.43			OR	0.64	0.28	1.44			Low	OR	-0.45	0.41	-0.45	0.41	-0.45
Sariachvili	2007	Prospective study on the Influence of Perinatal factors on the Occurrence of asthma and allergies (PIPO )	prospective cohort	prospective	Ever breastfed	TBF	never	ever	0	0	2	>0	>0	AD	Ever AD		atopic	AD	0to4	1	normal	low/normal	Unclear	Other	Low	Low					OR	1.3	0.9	1.8	0.22								Low	OR	0.26	0.17			0.26
Kull	2002	BAMSE	prospective cohort	prospective	Total duration of breastfeeding	TBF	< 6	>= 6	6	5to7	2	>=6	>=6	AD	Ever AD		atopic	AD	0to4	2	normal	low/normal	Unclear	Other	Low	Low											OR	0.88	0.72	1.05			Low	OR	-0.1	0.1	-0.13	0.09	-0.13
Nakamura	1999	Nakamura, Y.	CROSS SECTIONAL	retrospective	Ever breastfed	TBF	never	ever	0	0	2	>0	>0	AD	history of atopic dermatitis		atopic	AD	0to4	3	normal	low/normal	Unclear	Other	Low	Low	243	152	844	694	OR	1.17	0.97	1.4			OR	1.16	0.96	1.4			Low	OR	0.16	0.09	0.15	0.1	0.15
Karino	2008	Karino, University of Tokyo	CROSS SECTIONAL	retrospective	Total duration of breastfeeding	TBF	?3	>3	3	3to4	2	>=3	>=3	AD			atopic	AD	ge15	18	normal	low/normal	Unclear	Other	Low	Low					OR	1.3			0.001	FOR AD: Nutrition in infancy caused no significant. difference between the groups in each of the 2 classifications. As for the duration of breastfeeding, longer durations were significant correlates of increased odds for AD. However, ORs showed that the effect was very weak. The OR for the duration of more than 24 weeks in duration 1 was 1.3 (P .03). The OR in duration 2, duration 3, and duration…	OR	1.2	1	1.4		Besides the 5 significant variables, duration 3 was used as a potential explanatory variable for logistic regression analysis with multiple variables (Table 4).	Low	OR			0.18	0.08	0.18
Miyake	2003	Miyake, Osaka City	CROSS SECTIONAL	retrospective	Total duration of breastfeeding	TBF	0	>=3	0	0	2	medium	>=3	AD	Atopic eczema		atopic	AD	ge15	15	normal	low/normal	High	Other	Low	Low					OR	1.45	1.05	2.05			OR	1.4	1.01	1.98			Low	OR	0.37	0.18	0.34	0.18	0.34
Kurt	2010	Prevalence and Risk Factors of Allergies in Turkey (PARFAIT)	CROSS SECTIONAL	retrospective	Ever breastfed	TBF	never	ever	0	0	2	>0	>0	AD	Eczema		atopic	AD	ge15	15	normal	low/normal	Low	Low	Low	Low					OR						OR	1.01	0.92	1.12	<0.05		Low	OR			0.01	0.05	0.01
Rothenbacher	2005	Rothenbacher, Ulm University	prospective cohort	prospective	Total duration of breastfeeding	TBF	<3	0	0	0	2	>0	>0	AD	Ever AD		atopic	AD	0to4	2	normal	low/normal	Low	Low	Low	Low																	Low	OR	0.58	0.35			0.58
Rothenbacher	2005	Rothenbacher, Ulm University	prospective cohort	prospective	Total duration of breastfeeding	TBF	<3	>=3	3	3to4	2		>=3	AD	Ever AD		atopic	AD	0to4	2	normal	low/normal	Low	Low	Low	Low																	Low	OR	-0.42	0.26			-0.42
Sears	2002	Dunedin Multidisciplinary Health and Development Research Study	prospective cohort	prospective	duration of total BF	TBF	<1	>=1	1	1to2	2	>=1	Established breast-feeding was defined as breast-feeding from birth and continu- ing for>=4 weeks. We also analyzed outcomes using 3 levels of breast- feeding duration (nil, not breast-fed or breast-fed for less than 4 weeks [reference]; short, breast-fed for between 4 weeks and 24 weeks; and long, breast-fed for longer than 24 weeks	Allergic Sensitization	SPT-any	SPT-AEROALLERGEN	atopic	AEROALLERGEN	5to14	13	normal/low	normal	Unclear	Other	Low	Low					OR	1.91	1.42	2.58			OR	1.94	1.42	2.65			Low	OR	0.65	0.15	0.66	0.16	0.66
Rona	2005	Rona, Chile	retrspective cohort	retrospective	Total duration of breastfeeding	TBF	> 1	<=1	1	1to2	1	>=1	>=1	Allergic Sensitization	SPT-any	SPT-AEROALLERGEN	atopic	AEROALLERGEN	ge15	27	normal	low/normal	Unclear	Other	Low	Low											OR	0.98	0.7	1.35	0.883		Low	OR			-0.02	0.16	-0.02
Snijders (maternal IgE<=100IUm/ml)	2007	KOALA	prospective cohort	prospective	Total duration of breastfeeding	TBF	0	>9	0	0	2	long	>=9	Allergic Sensitization	total IgE		atopic	Total IgE	0to4	2	normal	low/normal	Low	Low	Low	Low					OR	2.73	1.5	4.98			OR	1.8	0.67	4.82			Low	OR	1	0.31	0.59	0.5	0.59
Snijders (maternal IgE>100IUm/ml)	2007	KOALA	prospective cohort	prospective	Total duration of breastfeeding	TBF	0	>9	0	0	2	long	>=9	Allergic Sensitization	total IgE		atopic	Total IgE	0to4	2	normal	low/normal	Low	Low	Low	Low					OR	5.21	1.32	20.67			OR	4.66	0.94	23.18			Low	OR	1.65	0.7	1.54	0.82	1.54
Scholtens	2009	PIAMA	prospective cohort	prospective	Total duration of breastfeeding	TBF	0	>3.5	0	0	2	medium	>=4	Allergic Sensitization	IgE-aeroallergen	sIgE-AEROALLERGEN	atopic	AEROALLERGEN	5to14	8	normal	low/normal	Low	Low	Low	Low											OR	0.8	0.57	1.14			Low	OR			-0.22	0.18	-0.22
Zutavern	2004	ZUTAVERN, A	prospective cohort	prospective	breastfed	TBF	NEVER	EVER	0	0	2	>0	>0	ALLERGIC SENSITISATION	SPT-aeroallergen	SPT-AEROALLERGEN	atopic	AEROALLERGEN	5to14	5.5	normal	low/normal	Low	Low	Low	Low									0.09	in the paper they call it prevalence at age 5.5 but based on the definition it is not for AD and transiet wheeze	OR	1.1	0.63	2		According to the findings from principal component analysis and the significance levels from the univariate analyses, introduction of egg and vegetables as well as breast feeding were incorporated in the multivariate models	Low	OR	0.41	0.23	0.1	0.31	0.1
Strachan (BCS58/70)	1997	National Child Development Study (British Cohort Study BSC58 and BSC70)	prospective cohort	prospective	Ever breastfed	TBF	never	ever	0	0	2	>0	>0	Allergic Sensitization	SPT-any	SPT-AEROALLERGEN	atopic	AEROALLERGEN	ge15	35	normal	low/normal	High	Other	Low	Low					OR	1.9	0.82	1.45			OR	1.09	0.82	1.45	0.4		Low	OR	0.64	-0.14	0.09	0.15	0.09
Snijders	2008	KOALA	prospective cohort	prospective	total duration of BF	TBF	0	>9	0	0	2	long	>=9	Allergic Sensitization	IgE-AEROALLERGEN	sIgE-AEROALLERGEN	atopic	AEROALLERGEN	0to4	2	normal	low/normal	Low	Low	Low	Low					OR	1.83	0.81	4.14			OR	1.6	0.36	7.17			Low	OR	0.6	0.42	0.47	0.77	0.47
Kuehr	1992	Kuehr, J.	CROSS SECTIONAL	retrospective	Total duration of breastfeeding	TBF	<1	<8	1	1to2	2		>=1	ALLERGIC SENSITISATION	SPT-any	SPT-AEROALLERGEN	atopic	AEROALLERGEN	5to14	8	normal	low/normal	High	Other	Low	Low	149.745	150.75	234.765	328.671	OR						OR					NOT TESTED	Low	OR	0.23	0.22			0.23
Kuyucu	2004	ISAAC Phase 2 - Ankara,Turkey	CROSS SECTIONAL	retrospective	Total duration of breastfeeding	TBF	?6	>6	6	5to7	2	>=6	>=6	ALLERGIC SENSITISATION	SPT-any	SPT-AEROALLERGEN	atopic	AEROALLERGEN	5to14	11	normal	low/normal	Unclear	Other	Low	Low					OR	0.62	0.47	0.83	<0.25		OR	0.65	0.47	0.88		in multivariate analyses lack of, or short (<6 months) duration of breastfeeding significantly increased the risk of pollen sensitization.	Low	OR	-0.48	0.15	-0.43	0.15	-0.43
Nwaru	2010	DIPP (Type 1 Diabetes Prediction and Prevention Project)	prospective cohort	prospective	Total duration of breastfeeding	TBF	< 5	>9	5	5to7	2	long	>=9	Allergic Sensitization	IgE-aeoallergen	sIgE-AEROALLERGEN	atopic	AEROALLERGEN	5to14	5	normal	low/normal	Low	Low	Low	Low					OR	0.86	0.6	1.26			OR	0.69	0.43	1.11			Low	OR	-0.15	0.19	-0.37	0.24	-0.37
Shaheen	1996	Guinea-Bissau,West Africa	prospective cohort	prospective	Total duration of breastfeeding	TBF	<= 12	> 12	12	8to12	2	>=12	>=12	Allergic Sensitization	SPT-any	SPT-AEROALLERGEN	atopic	AEROALLERGEN	ge15	21	normal	low/normal	Unclear	Other	Low	Low											OR	0.47	0.12	1.9			Low	OR			-0.76	0.71	-0.76
Elliott	2008	ALSPAC	prospective cohort	prospective	Ever breastfed	TBF	never	ever	0	0	2	>0	>0	Allergic Sensitization	SPT-ANY	SPT-ANY	atopic	ANY	5to14	7	normal	low/normal	Unclear	Other	Low	Low					OR	1.14	0.97	1.34			OR	1.07	0.9	1.27			Low	OR	0.13	0.08	0.07	0.09	0.07
Mihrshahi	2007	Childhood ASTHMA Prevention Study (CAPS)	prospective cohort	prospective	Ever breastfed	TBF	never	ever	0	0	2	>0	>0	Allergic Sensitization	SPT-any	SPT-ANY	atopic	ANY	5to14	5	high	high	Low	Low	Low	Low					OR	1.12	0.6	2.12			OR	0.89	0.45	1.76			Low	OR	0.11	0.33	-0.12	0.35	-0.12
Snijders	2008	KOALA	prospective cohort	prospective	total duration of BF	TBF	0	>9	0	0	2	long	>=9	Allergic Sensitization	IgE-ANY	sIgE-ANY	atopic	ANY	0to4	2	normal	low/normal	Low	Low	Low	Low					OR	1.11	0.62	2			OR	1.89	0.7	5.12			Low	OR	0.1	0.3	0.64	0.51	0.64
Mihrshahi	2007	Childhood ASTHMA Prevention Study (CAPS)	prospective cohort	prospective	Total duration of breastfeeding	TBF	< 6	>= 6	6	5to7	2	>=6	>=6	Allergic Sensitization	SPT-any	SPT-ANY	atopic	ANY	5to14	5	high	high	Low	Low	Low	Low					OR	1.71	1.19	2.46			OR	1.56	1.07	2.27			Low	OR	0.54	0.19	0.44	0.19	0.44
Huurre	2008	Huurre	prospective cohort	prospective	Total duration of breastfeeding	TBF	<6	>=6	6	5to7	2	>=6	>=6	Allergic Sensitization	SPT-any	SPT-ANY	atopic	ANY	0to4	1	high	high	Low	Low	Low	Low											OR	4.83	1.52	15.38	0.005		Low	OR			1.57	0.59	1.57
Snijders	2008	KOALA	prospective cohort	prospective	total duration of BF	TBF	0	>9	0	0	2	long	>=9	Allergic Sensitization	IgE-Milk	sIgE-CM	atopic	CM	0to4	2	normal	low/normal	Low	Low	Low	Low					OR	0.66	0.33	1.33			OR	1.19	0.38	3.67			Low	OR	-0.42	0.36	0.17	0.57	0.17
Snijders	2008	KOALA	prospective cohort	prospective	total duration of BF	TBF	0	>9	0	0	2	long	>=9	Allergic Sensitization	IgE-EGG	sIgE-EGG	atopic	EGG	0to4	2	normal	low/normal	Low	Low	Low	Low					OR	1.18	0.34	4.12			OR	1.89	0.28	12.68			Low	OR	0.17	0.64	0.64	0.97	0.64
Rowntree	1985	Rowntree	prospective cohort	prospective	Total duration of breastfeeding	TBF	0	>3	0	0	2		>0	Allergic Sensitization	IgE-egg	sIgE-EGG	atopic	EGG	5to14	5	high	high	High	Other	Low	Low										As reported previously, the prevalence of allergic disease appeared to be greater in children who were breast fed for greater than 3 months (definite disease 65%, no disease 13%) than in those who were bottle fed (definite disease 46%, no disease 31%). The difference could not be explained by immune responses to inhalant allergens as no significant differences in either development or concentrati…							Low	OR	-0.7	0.61			-0.7
Hong	2011	Boston Birth Cohort	prospective cohort	prospective	Ever breastfed	TBF	never	ever	0	0	2	>0	>0	Allergic Sensitization	IgE- any food allergen	sIgE-FOOD	atopic	FOOD	0to4	3	normal	low/normal	Unclear	Other	Low	Low					OR	1.6	1.1	2.2	0.005		OR	1.5	1.1	2.1	0.019	Because FS status defined at the age of 2 years or greater might be more stable and persistent, we then stratified the total sample into 2 groups according to the age when FS status was defined.We observed that the positive association between breast-feeding and FS was stronger in children aged 2 or more years (OR, 2.3; 95% CI, 1.3-4.1) than in those aged less than 2 years (OR, 1.1; 95% CI, 0.7-1…	Low	OR	0.47	0.16	0.41	0.17	0.41
Nwaru	2010	DIPP (Type 1 Diabetes Prediction and Prevention Project)	prospective cohort	prospective	Total duration of breastfeeding	TBF	< 5	>9	5	5to7	2	long	>=9	Allergic Sensitization	IgE-foodallergen	sIgE-FOOD	atopic	FOOD	5to14	5	normal	low/normal	Low	Low	Low	Low					OR	0.96	0.62	1.47			OR	1.07	0.63	1.83			Low	OR	-0.04	0.22	0.07	0.27	0.07
Snijders	2008	KOALA	prospective cohort	prospective	total duration of BF	TBF	0	>9	0	0	2	long	>=9	Allergic Sensitization	IgE-PEANUT	sIgE-PEANUT	atopic	PEANUT	0to4	2	normal	low/normal	Low	Low	Low	Low					OR	0.52	0.14	1.97			OR	1.15	0.15	9.03			Low	OR	-0.65	0.68	0.14	1.05	0.14
Taylor (BCS70)	1984	British Cohort Study (BCS70)	prospective cohort	prospective	Total duration of breastfeeding	TBF	0	>1	0	0	2	>0	>0	AD	Ever AD		atopic	AD	5to14	5	normal	low/normal	Unclear	Other	Low	Low																		OR	0.31	0.05			0.31
Mandhane	2007	Dunedin Multidisciplinary Health and Development Research Study	prospective cohort	prospective	Duration of exclusive breastfeeding	eBF	<1	>=1	1	1to2	2	>=1		Asthma(ICS/excercise).12mo			atopic	BHR	5to14	9	normal	low/normal	High	Other								OR				0.07	Irrespective of sex and parental history of atopy, asthma (wheeze with AHR) at age 9 years and atopy at age 13 years (see odds ration in id 3338) were more prevalent among breast-fed study members (asthma, 13.7% vs 5.3%, P < .001; atopy, 52.7% vs 36.8%, P < .001). The influence of breast-feeding on asthma and atopy was greatest among those infants breast-fed for between 4 weeks and 24 weeks, alth…	OR						OR	1.13	0.26			1.13
Oddy	1999	Western Australia Pregnancy Cohort, Oddy	prospective cohort	prospective	duration of exclusive breastfeeding	eBF	> =3	< 3	3	3to4	1	>=3		Asthma-Wheeze	asthma diagnosed by a doctor		atopic	wheeze.rec	5to14	6	normal/low	normal	Low	Low	Unclear	Unclear-High											OR	1.2	0.98	1.48	0.084		Unclear	OR			0.18	0.11	0.18
Oddy	1999	Western Australia Pregnancy Cohort, Oddy	prospective cohort	prospective	duration of exclusive breastfeeding	eBF	> = 5	< 5	5	ge5	1	>=5		Asthma-Wheeze	asthma diagnosed by a doctor		atopic	wheeze.rec	5to14	6	normal/low	normal	Low	Low	Unclear	Unclear-High											OR	1.21	0.99	1.47	0.063		Unclear	OR			0.19	0.1	0.19
Besednjak-Kocijancic	2010	Besednjak-Kocijancic	prospective cohort	prospective	Duration of exclusive breastfeeding	eBF	4	6	4	3to4	2	6		Asthma-Wheeze	Asthma		atopic	wheeze.rec	0to4	1	high	high	High	Other	Unclear	Unclear-High									>0.01	in two groups: group A-286 children exclusively breastfed for 6 and group B 122 children exclusive breastfed for 4 months. The prevalence of asthma, AD and of cow's milk, hen's egg, wheat allergy at the age of 1 and 5 years was observed. Statistical analysis was performed with SPSS 11.0 using chi-square analysis with Yates' correction. P-values <0.01 were considered significant. Results: At 1 yea…							Unclear	OR	-0.41	0.37			-0.41
Nielsen	2002	Nielsen	prospective cohort	prospective	exclusive or partial breastfeeding for at least 4 months	eBF	less than months	4 months of either exclusive or partial breastfeeding	4	3to4	2	4		Asthma-Wheeze	wheeze		atopic	wheeze.rec	0to4	0.5	normal/low	normal	High	Other	Unclear	Unclear-High					OR	0.72	0.62	0.83	<0.001		Not available						Unclear	OR	-0.33	0.07			-0.33
Majeed	2008	Majeed, R.	CASE CONTROL	retrospective	Exclusive BF	eBF	<4	4+	4	3to4	2	>=4		Asthma-Wheeze	Recurrent wheeze		atopic	wheeze.rec	0to4	3	normal/low	normal	High	Other	Unclear	Unclear-High	70	130	45	153													Unclear	OR	0.6	0.23			0.6
Besednjak-Kocijancic	2010	Besednjak-Kocijancic	prospective cohort	prospective	Duration of exclusive breastfeeding	eBF	4	6	4	3to4	2	6		Asthma-Wheeze	Asthma		atopic	wheeze.rec	5to14	5	high	high	High	Other	Unclear	Unclear-High									<0.01	At the age of 5 years the difference between two groups in prevalence of asthma (A: 5.6%, B: 14.6%) and AD (A: 7.4%, B: 18.9%), (P < 0.01) was significant, but the increase of the prevalence of both diseases from 1 to 5 years of age in each group wasn't significant (P > 0.05). Also the prevalence of allergy to observed allergens wasn't significantly higher (P > 0.01).							Unclear	OR	-1.06	0.36			-1.06
Liu	2012	Liu 2012	cross-sectional	retrospective	duration	eBF		yes/no	3	3to4	2	>=3		Asthma-Wheeze	Asthma		atopic	wheeze.rec	5to14	8	normal/low	normal	High	Other	Unclear	Unclear-High	NA	NA	NA	NA	OR	0.78	0.64	0.96									Unclear	OR	-0.25	0.11			-0.25
Midwinter	1987	MIDWINTER, RE.	prospective cohort	prospective	Duration of exclusive breastfeeding	eBF	<1	1	1	0to2	2	0TO2		Asthma-Wheeze	asthma		atopic	wheeze.rec	5to14	5	high	high	High	Other	Unclear	Unclear-High										Table 1 shows the association between infant feeding and risk of developing asthma: there were no significant differences.							Unclear	OR	-0.25	0.32			-0.25
Marini	1996	Marini	see ever BF and other exposures IN NON-INTERVENTION GROUP- THIS IS THE INTERVENTION GROUP	prospective	CM vs HM	eBF	Breast milk	adapted cow's milk formula	4	3to4	1	>=4		WHEEZE	recurrent wheeze		atopic	wheeze.rec	0to4	1	high	high	Unclear	Other	Unclear	Unclear-High																	Unclear	OR	1.63	1.24			1.63
Ratageri	2002	Ratageri, INDIA	CASE CONTROL	retrospective	Duration of exclusive breastfeeding	eBF	<4	?4	4	3to4	2	>=4		Asthma-Wheeze	Doctor-diagnosed asthma		atopic	wheeze.rec	5to14	9	normal/low	normal	Unclear	Other	Unclear	Unclear-High					OR				ns		OR	0.25	0.08	0.7	<0.05		Unclear	OR			-1.39	0.53	-1.39
Oddy	1999	Western Australia Pregnancy Cohort, Oddy	prospective cohort	prospective	duration of exclusive breastfeeding	eBF	> =3	< 3	3	3to4	1	>=3		Asthma-Wheeze	wheezing in the past year		atopic	wheeze	5to14	6	normal/low	normal	Low	Low	Unclear	Unclear-High											OR	1.19	0.95	1.49	0.135		Unclear	OR			0.17	0.11	0.17
Oddy	1999	Western Australia Pregnancy Cohort, Oddy	prospective cohort	prospective	duration of exclusive breastfeeding	eBF	> =6	< 6	6	ge5	1	>=6		Asthma-Wheeze	wheezing in the past year		atopic	wheeze	5to14	6	normal/low	normal	Low	Low	Unclear	Unclear-High											OR	1.26	1	1.59	0.046		Unclear	OR			0.23	0.12	0.23
Kemeny	1991	Kemeny, King's and Dulwich Hospitals	prospective cohort	prospective	Duration of exclusive breastfeeding	eBF	>=3	<3	3	3to4	1	>=3		Asthma-Wheeze	Ever Wheeze		atopic	wheeze	0to4	1	normal/low	normal	High	Other	Unclear	Unclear-High																	Unclear	OR	0.91	0.43			0.91
Salem	2002	Salem, M. B.	CROSS SECTIONAL	retrospective	Duration of exclusive breastfeeding	eBF	>6	?6	6	ge5	1	>=6		Asthma-Wheeze	Wheeze		atopic	wheeze	0to4	5	normal/low	normal	High	Other	Unclear	Unclear-High	22	45	103	254	OR				ns		OR						Unclear	OR	0.19	0.29			0.19
Liu	2012	Liu 2012	cross-sectional	retrospective	duration	eBF		yes/no	3	3to4	2	>=3		Asthma-Wheeze	wheezing prevalence		atopic	wheeze	5to14	8	normal/low	normal	High	Other	Unclear	Unclear-High					OR	0.92	0.74	1.15									Unclear	OR	-0.08	0.11			-0.08
Kemeny	1991	Kemeny, King's and Dulwich Hospitals	prospective cohort	prospective	Duration of exclusive breastfeeding	eBF	>=3	<3	3	3to4	1	>=3		Food Allergy	Ever FA-egg		atopic	FA-EGG	0to4	1	normal/low	normal	High	Other	Unclear	Unclear-High																	Unclear	OR	0.76	1.13			0.76
Besednjak-Kocijancic	2010	Besednjak-Kocijancic	prospective cohort	prospective	Duration of exclusive breastfeeding	eBF	4	6	4	3to4	2	6		Food Allergy	egg		atopic	FA-EGG	0to4	1	high	high	High	Other	Unclear	Unclear-High									>0.01	in two groups: group A-286 children exclusively breastfed for 6 and group B 122 children exclusive breastfed for 4 months. The prevalence of asthma, AD and of cow's milk, hen's egg, wheat allergy at the age of 1 and 5 years was observed. Statistical analysis was performed with SPSS 11.0 using chi-square analysis with Yates' correction. P-values <0.01 were considered significant. Results: At 1 yea…							Unclear	OR	-0.65	0.35			-0.65
Besednjak-Kocijancic	2010	Besednjak-Kocijancic	prospective cohort	prospective	Duration of exclusive breastfeeding	eBF	4	6	4	3to4	2	6		Food Allergy	cow's milk		atopic	FA-CM	0to4	1	high	high	High	Other	Unclear	Unclear-High									>0.01	in two groups: group A-286 children exclusively breastfed for 6 and group B 122 children exclusive breastfed for 4 months. The prevalence of asthma, AD and of cow's milk, hen's egg, wheat allergy at the age of 1 and 5 years was observed. Statistical analysis was performed with SPSS 11.0 using chi-square analysis with Yates' correction. P-values <0.01 were considered significant. Results: At 1 yea…							Unclear	OR	-3.11	1.14			-3.11
Host	1991	ODENSE BIRTH COHORT	prospective cohort	prospective	Duration of exclusive breastfeeding	eBF	<1	>1	1	0to2	2	>=1		Food Allergy	cow's milk allergy (CMA)only		atopic	FA-CM	0to4	1	normal/low	normal	High	Other	Unclear	Unclear-High																	Unclear	OR	0.5	0.7			0.5
Saarinen	1979	Saarinen	prospective cohort	prospective	Duration of exclusive breast feeding	eBF	<2	6	2	0to2	2	6		FOOD ALLERGY			atopic	FA-ANY	0to4	1	normal/low	normal	High	Other	Unclear	Unclear-High																	Unclear	OR	-0.85	0.64			-0.85
Poysa	1992	Poysa	prospective cohort	prospective	duration of exclusive breastfeeding	eBF	<3	>=3	3	3to4	2	>=3		other	BHR was considered to be present if PEF fell at least 20% after a dose below 4,900 pg of methacholine.	LF-PC20(PEF)	atopic	BHR	5to14	10	high	high	High	Other	Unclear	Unclear-High									ns	The diet consumed in infancy seemed to have no influence on subsequent SPT or MIC results.							Unclear	OR	-0.66	0.54			-0.66
Liu	2012	Liu 2012	cross-sectional	retrospective	duration	eBF		yes/no	3	3to4	2	>=3		Rhinoconjunctivits	allergic rhinitis		atopic	AR	5to14	8	normal/low	normal	High	Other	Unclear	Unclear-High					OR	0.72	0.57	0.9									Unclear	OR	-0.33	0.11			-0.33
Marini	1996	Marini	see ever BF and other exposures IN NON-INTERVENTION GROUP- THIS IS THE INTERVENTION GROUP	prospective	CM vs HM	eBF	Breast milk	adapted cow's milk formula	4	3to4	1	>=4		RHINOCONJUNCTIVITIS			atopic	AR	0to4	3	high	high	Unclear	Other	Unclear	Unclear-High																	Unclear	OR	-0.18	1.03			-0.18
Kitz	2006	Kitz	Prospective cohort	prospective	Exclusive BF duration	eBF	0	0+	0	0to2	2	>0		AD			atopic	AD	0to4	1	high	high	High	Other	Unclear	Unclear-High																	Unclear	OR	1.6	1.05			1.6
Kemeny	1991	Kemeny, King's and Dulwich Hospitals	prospective cohort	prospective	Duration of exclusive breastfeeding	eBF	>=3	<3	3	3to4	1	>=3		AD	Ever AD		atopic	AD	0to4	1	normal/low	normal	High	Other	Unclear	Unclear-High																	Unclear	OR	0.21	0.4			0.21
Kitz	2006	Kitz	Prospective cohort	prospective	Exclusive BF duration	eBF	<4	4+	4	3to4	2	>=4		AD			atopic	AD	0to4	1	high	high	High	Other	Unclear	Unclear-High																	Unclear	OR	-0.34	0.46			-0.34
Besednjak-Kocijancic	2010	Besednjak-Kocijancic	prospective cohort	prospective	Duration of exclusive breastfeeding	eBF	4	6	4	3to4	2	6		AD			atopic	AD	0to4	1	high	high	High	Other	Unclear	Unclear-High									<0.01	in two groups: group A-286 children exclusively breastfed for 6 and group B 122 children exclusive breastfed for 4 months. The prevalence of asthma, AD and of cow's milk, hen's egg, wheat allergy at the age of 1 and 5 years was observed. Statistical analysis was performed with SPSS 11.0 using chi-square analysis with Yates' correction. P-values <0.01 were considered significant. Results: At 1 yea…							Unclear	OR	-1.02	0.26			-1.02
Shohet	1985	Shohet	prospective cohort	prospective	Duration of exclusive breast feeding	eBF	6	0-6	6	ge5	1	>=6		AD			atopic	AD	0to4	0.5	normal/low	normal	High	Other	Unclear	Unclear-High									NS	No significant difference							Unclear	OR	-0.16	0.54			-0.16
Saarinen	1979	Saarinen	prospective cohort	prospective	Duration of exclusive breast feeding	eBF	<2	6	2	0to2	2	6		AD			atopic	AD	0to4	1	normal/low	normal	High	Other	Unclear	Unclear-High																	Unclear	OR	-0.9	0.53			-0.9
Shohet	1985	Shohet	prospective cohort	prospective	Duration of exclusive breast feeding	eBF	6	0	0	0to2	1	6		AD			atopic	AD	0to4	0.5	normal/low	normal	High	Other	Unclear	Unclear-High									NS	No significant difference							Unclear	OR	0.38	0.45			0.38
Besednjak-Kocijancic	2010	Besednjak-Kocijancic	prospective cohort	prospective	Duration of exclusive breastfeeding	eBF	4	6	4	3to4	2	6		AD			atopic	AD	5to14	5	high	high	High	Other	Unclear	Unclear-High									<0.01	At the age of 5 years the difference between two groups in prevalence of asthma (A: 5.6%, B: 14.6%) and AD (A: 7.4%, B: 18.9%), (P < 0.01) was significant, but the increase of the prevalence of both diseases from 1 to 5 years of age in each group wasn't significant (P > 0.05). Also the prevalence of allergy to observed allergens wasn't significantly higher (P > 0.01).							Unclear	OR	-1.07	0.32			-1.07
Midwinter	1987	MIDWINTER, RE.	prospective cohort	prospective	Duration of exclusive breastfeeding	eBF	<1	1	1	0to2	2	0TO2		AD			atopic	AD	5to14	5	high	high	High	Other	Unclear	Unclear-High										The association between early feeding and eczema during the first 5 years is shown in Table 2; there were no significant differences.							Unclear	OR	0.03	0.19			0.03
Marini	1996	Marini	see ever BF and other exposures IN NON-INTERVENTION GROUP- THIS IS THE INTERVENTION GROUP	prospective	CM vs HM	eBF	Breast milk	adapted cow's milk formula	4	3to4	1	>=4		AD			atopic	AD	0to4	1	high	high	Unclear	Other	Unclear	Unclear-High																	Unclear	OR	0.76	0.57			0.76
Vandenplas	1988	Vandenplas	prospective cohort (of RCT)	prospective	duration of exclusive bf	eBF	<4	>=4	4	3to4	2		>=4	ALLERGIC SENSITISATION	Total IgE		atopic	Total IgE	0to4	0.33	high	high	High	Other	Unclear	Unclear-High																	Unclear	OR	1.54	0.8			1.54
Odelram	1996	Odelram,SWEDEN	prospective cohort	prospective	Duration of exclusive breastfeeding	eBF	<=9	>9	9	ge5	2		>=9	Allergic Sensitization	total IgE		atopic	Total IgE	0to4	1.5	high	high	High	Other	Unclear	Unclear-High																	Unclear	OR	0.02	0.62			0.02
Poysa	1992	Poysa	prospective cohort	prospective	duration of exclusive breastfeeding	eBF	<3	>=3	3	3to4	2		>=3	Allergic Sensitization	SPT-aeroallergen	SPT-AEROALLERGEN	atopic	AEROALLERGEN	5to14	10	high	high	High	Other	Unclear	Unclear-High									ns	The diet consumed in infancy seemed to have no influence on subsequent SPT or MIC results.							Unclear	OR	0.03	0.5			0.03
Oddy	1999	Western Australia Pregnancy Cohort, Oddy	prospective cohort	prospective	duration of exclusive breastfeeding	eBF	> =3	< 3	3	3to4	1		>=3	Allergic Sensitization	SPT-AEROALLERGEN	SPT-AEROALLERGEN	atopic	AEROALLERGEN	5to14	6	normal/low	normal	Low	Low	Unclear	Unclear-High											OR	1.19	0.95	1.48	0.138		Unclear	OR			0.17	0.11	0.17
Oddy	1999	Western Australia Pregnancy Cohort, Oddy	prospective cohort	prospective	duration of exclusive breastfeeding	eBF	> =6	< 6	6	ge5	1		>=6	Allergic Sensitization	SPT-AEROALLERGEN	SPT-AEROALLERGEN	atopic	AEROALLERGEN	5to14	6	normal/low	normal	Low	Low	Unclear	Unclear-High											OR	1.11	0.89	1.38	0.356		Unclear	OR			0.1	0.11	0.1
Odelram	1996	Odelram,SWEDEN	prospective cohort	prospective	Duration of exclusive breastfeeding	eBF	<=9	>9	9	ge5	2		>=9	Allergic Sensitization	SPT-any allergen	SPT-ANY	atopic	ANY	0to4	1.5	high	high	High	Other	Unclear	Unclear-High																	Unclear	OR	0.44	0.88			0.44
Kemeny	1991	Kemeny, King's and Dulwich Hospitals	prospective cohort	prospective	Duration of exclusive breastfeeding	eBF	>=3	<3	3	3to4	1		>=3	Allergic Sensitization	IgE-cow's milk	sIgE-CM	atopic	CM	0to4	1	normal/low	normal	High	Other	Unclear	Unclear-High																	Unclear	OR	-0.65	1.42			-0.65
Odelram	1996	Odelram,SWEDEN	prospective cohort	prospective	Duration of exclusive breastfeeding	eBF	<=9	>9	9	ge5	2		>=9	Allergic Sensitization	IgE- cow's milk	sIgE-CM	atopic	CM	0to4	1.5	high	high	High	Other	Unclear	Unclear-High																	Unclear	OR	-0.12	0.66			-0.12
Kemeny	1991	Kemeny, King's and Dulwich Hospitals	prospective cohort	prospective	Duration of exclusive breastfeeding	eBF	>=3	<3	3	3to4	1		>=3	Allergic Sensitization	IgE-egg	sIgE-EGG	atopic	EGG	0to4	1	normal/low	normal	High	Other	Unclear	Unclear-High																	Unclear	OR	-0.45	0.69			-0.45
Majeed	2008	Majeed, R.	CASE CONTROL	retrospective	weaning not defined (formula or non-milk feed) time of initiation	solid	4+	<4	4	3to4	1	>=4	>=4	Asthma-Wheeze	Recurrent wheeze		atopic	wheeze.rec	0to4	3	normal	low/normal	Other	Other	Unclear	Unclear-High	124	76	80	118													Unclear	OR	0.88	0.21			0.88
Marini	1996	Marini	prospective cohort (of RCT-CCT)	prospective	SOLID FOOD	solid	>=4	<4	4	3to4	1	>=4	>=4	WHEEZE	recurrent wheeze		atopic	wheeze.rec	0to4	3	high	high	Other	Other	Unclear	Unclear-High											OR	0.4	0.1	1.3			Unclear	OR			-0.92	0.6	-0.92
Marini	1996	Marini	prospective cohort (of RCT-CCT)	prospective	SOLID FOOD	solid	>=4	<4	4	3to4	1	>=4	>=4	RHINOCONJUNCTIVITIS			atopic	AR	0to4	3	high	high	Other	Other	Unclear	Unclear-High											OR	0.7	0.2	1.2			Unclear	OR			-0.36	0.27	-0.36
Marini	1996	Marini	prospective cohort (of RCT-CCT)	prospective	SOLID FOOD	solid	>=4	<4	4	3to4	1	>=4	>=4	AD			atopic	AD	0to4	1	high	high	Other	Other	Unclear	Unclear-High											OR	3.9	1.1	13.9			Unclear	OR			1.36	0.65	1.36
Sariachvili	2010	PIPO COHORT	NESTED CASE CONTROL	prospective	Any Solid Food	solid	>4	<=4	4	3to4	1	>=4	>=4	AD			atopic	AD	0to4	4	normal	low/normal	Low	Low	Unclear	Unclear-High	100	252	160	205	OR	0.6	0.43	0.84	<0.01		OR	0.49	0.32	0.74			Unclear	OR	-0.51	0.17	-0.71	0.21	-0.71
Al-Kubaisy	2005	Al-Kubaisy, W.	CROSS-SECTIONAL	retrospective	Ever breastfed	TBF	ever	never	0	0	1	>0	>0	Asthma-Wheeze	Doctor-diagnosed Asthma		atopic	wheeze.rec	5to14	12	normal	low/normal	High	Other	Unclear	Unclear-High	163	481	454	1164	OR	0.87	0.7	1.07			OR						Unclear	OR	-0.14	0.11			-0.14
Al-Kubaisy	2005	Al-Kubaisy, W.	CROSS-SECTIONAL	retrospective	Total duration of breastfeeding	TBF	>=6	<6	6	5to7	1	>=6	>=6	Asthma-Wheeze	Doctor-diagnosed Asthma		atopic	wheeze.rec	5to14	12	normal	low/normal	High	Other	Unclear	Unclear-High	83	398	185	979	OR	1.11	0.82	1.49			OR						Unclear	OR	0.1	0.15			0.1
Puig	2010	Hospital del Mar, Spain	prospective cohort	prospective	Ever breastfed	TBF	ever	never	0	0	1	>0	>0	Asthma-Wheeze	Ever Asthma		atopic	wheeze.rec	5to14	6	normal	low/normal	Low	Low	Unclear	Unclear-High										data of BF on wheeze not show in tbales. Most likely not significant	OR	1.05	1.18	9.3	0.035		Unclear	OR			0.05	1.11	0.05
Selcuk	1996	Selcuk, Z. T. TURKEY	CROSS SECTIONAL	retrospective	Ever breastfed	TBF	ever	never	0	0	1	>0	>0	Asthma-Wheeze	ever Asthma		atopic	wheeze.rec	5to14	12	normal	low/normal	Low	Low	Unclear	Unclear-High					OR						OR	1.62	1.1	2.38	<0.05		Unclear	OR			0.48	0.2	0.48
Oddy	1999	Western Australia Pregnancy Cohort, Oddy	prospective cohort	prospective	duration of total breastfeeding	TBF	> =4	< 4	4	3to4	1	>=4	>=4	Asthma-Wheeze	asthma diagnosed by a doctor		atopic	wheeze.rec	5to14	6	normal	low/normal	Low	Low	Unclear	Unclear-High											OR	1.14	0.94	1.4	0.187		Unclear	OR			0.13	0.1	0.13
Oddy	1999	Western Australia Pregnancy Cohort, Oddy	prospective cohort	prospective	duration of total breastfeeding	TBF	> =6	< 6	6	5to7	1	>=6	>=6	Asthma-Wheeze	asthma diagnosed by a doctor		atopic	wheeze.rec	5to14	6	normal	low/normal	Low	Low	Unclear	Unclear-High											OR	1.18	0.97	1.45	0.101		Unclear	OR			0.17	0.11	0.17
Halken	1991	HALKEN, S	prospective cohort	prospective	Total duration of breastfeeding	TBF	>=6	0	0	0	1	long	6	Asthma-Wheeze	recurrent wheeze		atopic	wheeze.rec	0to4	1.5	low	low/normal	Low	Low	Unclear	Unclear-High											OR	1.6	0.9	2.8	>0.05		Unclear	OR	1.04	0.52	0.47	0.29	0.47
Halken	1991	HALKEN, S	prospective cohort	prospective	Total duration of breastfeeding	TBF	>=6	0-1	1	1to2	1	long	>=6	Asthma-Wheeze	recurrent wheeze		atopic	wheeze.rec	0to4	1.5	low	low/normal	Low	Low	Unclear	Unclear-High											OR	2	1	4	>0.05		Unclear	OR	0.98	0.47	0.69	0.35	0.69
Rhodes	2001	Rhodes-Poole hospital	prospective cohort	prospective	total duration of BF	TBF	>=3	<3	3	3to4	1	>=3	>=3	Asthma-Wheeze	Asthma		atopic	wheeze.rec	ge15	22	high	high	High	Other	Unclear	Unclear-High					OR	2.2	0.6	7.8	0.25						not tested	The variables (from Tables II-V) with P values of less than .2 were selected for multivariable analysis	Unclear	OR	0.79	0.65			0.79
Friday	2000	Friday	retrspective cohort	retrospective	Total duration of breastfeeding	TBF	never	ever	0	0	2	>0	>0	Asthma-Wheeze	Asthma(DD).12mo		atopic	wheeze.rec	5to14	10?	high	high	High	Other	Unclear	Unclear-High																	Unclear	OR	-0.14	0.44			-0.14
Friday	2000	Friday	retrspective cohort	retrospective	Total duration of breastfeeding	TBF	<3	>=3	3	3to4	2	>=3	>=3	Asthma-Wheeze	Asthma(DD).12mo		atopic	wheeze.rec	5to14	10?	high	high	High	Other	Unclear	Unclear-High																	Unclear	OR	-0.4	0.44			-0.4
Friday	2000	Friday	retrspective cohort	retrospective	Total duration of breastfeeding	TBF	<6	>=6	6	5to7	2	>=6	>=6	Asthma-Wheeze	Asthma(DD).12mo		atopic	wheeze.rec	5to14	10?	high	high	High	Other	Unclear	Unclear-High																	Unclear	OR	0.07	0.51			0.07
Wickens	2001	Wickens,K. NEW ZEALAND	case control	retrospective	Ever breastfed	TBF	never	ever	0	0	2	>0	>0	Asthma-Wheeze	wheeze		atopic	wheeze.rec	5to14	6.5	normal	low/normal	High	Other	Unclear	Unclear-High	208	21	219	20	OR	0.91	0.48	1.72									Unclear	OR	-0.09	0.32			-0.09
Goksor	2009	Infants of Western Sweden	prospective cohort	prospective	BF present/absent	TBF	<4	4+	4	3to4	2	>=4	>=4	Asthma-Wheeze	Recurrent wheeze		atopic	wheeze.rec	5to14	4.5	normal	low/normal	High	Other	Unclear	Unclear-High					OR	0.7	0.5	0.97		Not clear whether this is adjusted or unadjusted - no mention of adjustment made, so presumed to be unadjusted							Unclear	OR	-0.36	0.17			-0.36
Midodzi	2010	Canadian Early Childhood Development Cohort Study (part of National Longitudinal Survey of Children and Youth)	prospective cohort	prospective	Total duration of breastfeeding	TBF	0	>3	0	0	2	medium	>3	Asthma-Wheeze	Ever Asthma		atopic	wheeze.rec	5to14	5	normal	low/normal	Unclear	Other	Unclear	Unclear-High					HR	0.71	0.61	0.82			HR	0.82	0.69	0.97			Unclear	HR	-0.34	0.07	-0.2	0.09	-0.2
Businco	1987	BUSINCO L	prospective cohort	prospective	Ever breastfed	TBF	never	ever	0	0	2	>0	>0	Asthma-Wheeze	Ever asthma(DD)		atopic	wheeze.rec	0to4	8	high	high	High	Other	Unclear	Unclear-High																	Unclear	OR	-1.08	0.42			-1.08
[truncated: 48 more rows]
[truncated: 4 more columns]
